# Supplementary material for: Biochemical Mechanism of Fresh-Cut Lotus (Nelumbo nucifera Gaertn.) Root with Exogenous Melatonin Treatment by Multiomics Analysis
Source: MDPI journal article supplement (doi:10.3390/foods12010044), 2022-12-22
Supplement: s1 [file s1]

**A**

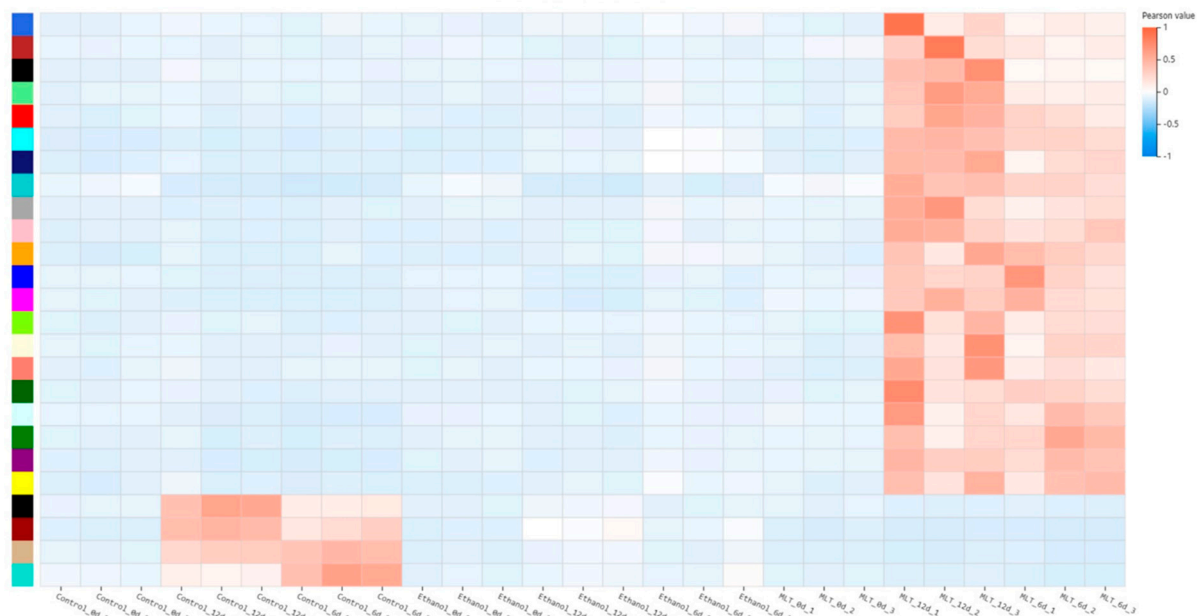

**B**

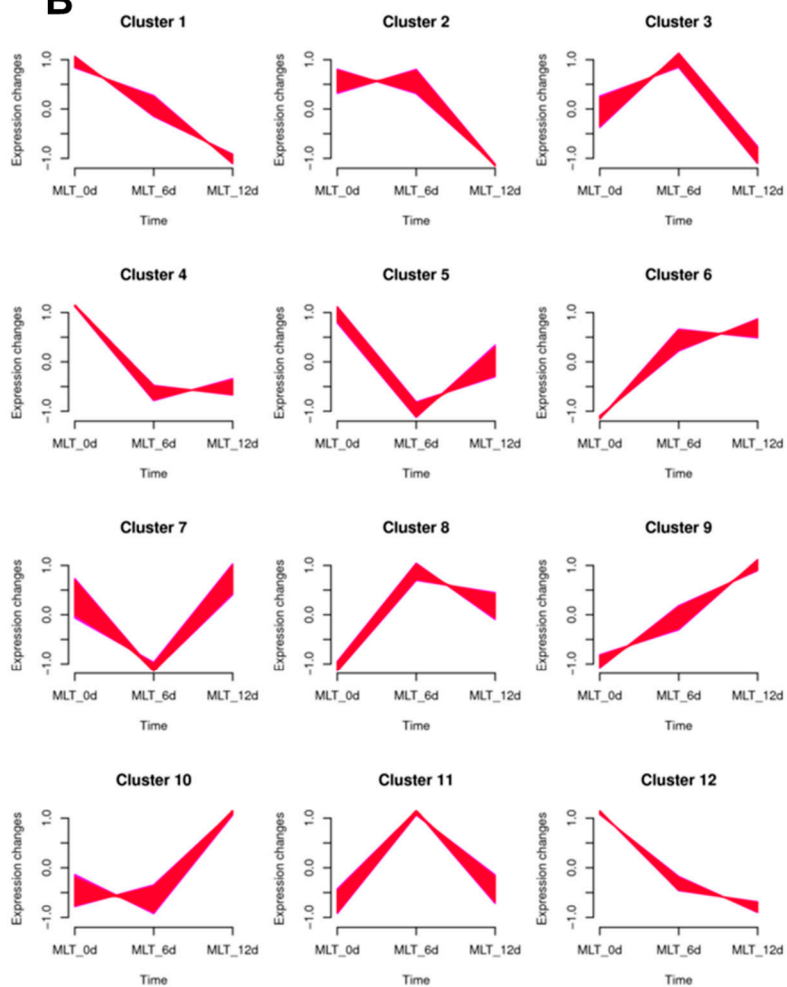

**Figure S1. Co-expression network during melatonin treatment.** A: WGCNA analysis of RNA-seq data from different stages of melatonin treatment. B: Network hubs regulating genes in differentiation stage. Color codes indicate that the gene displayed with the peak expression in the corresponding stages.

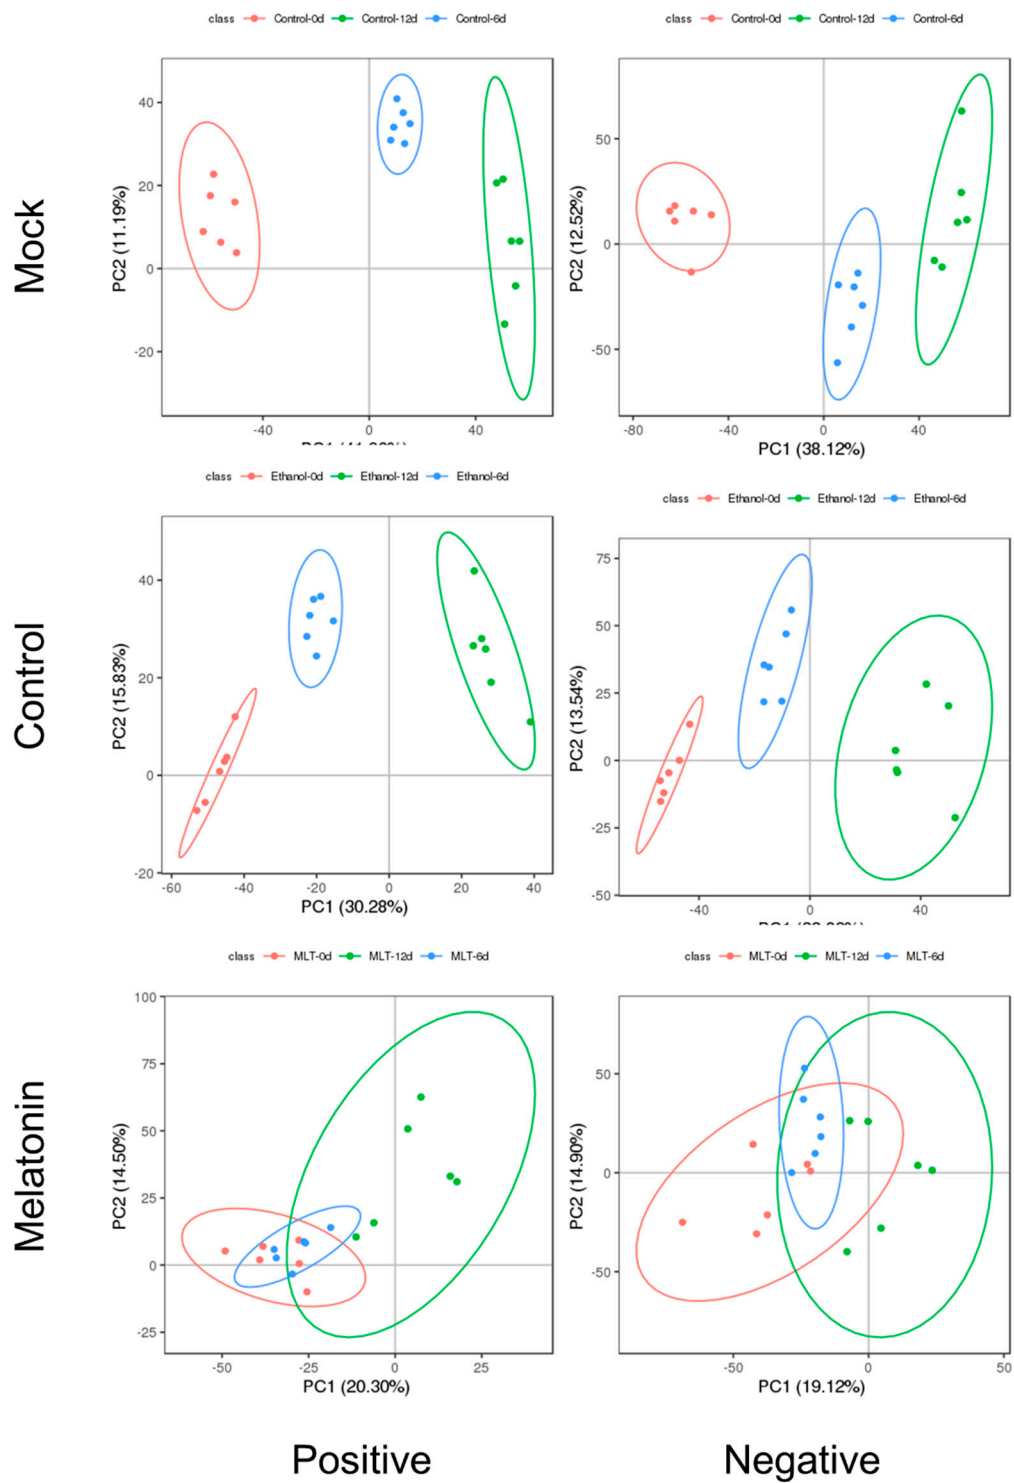

**Figure S2. PCA principal component analysis of the expression profiles of fresh cut lotus root were treated with melatonin solution.**

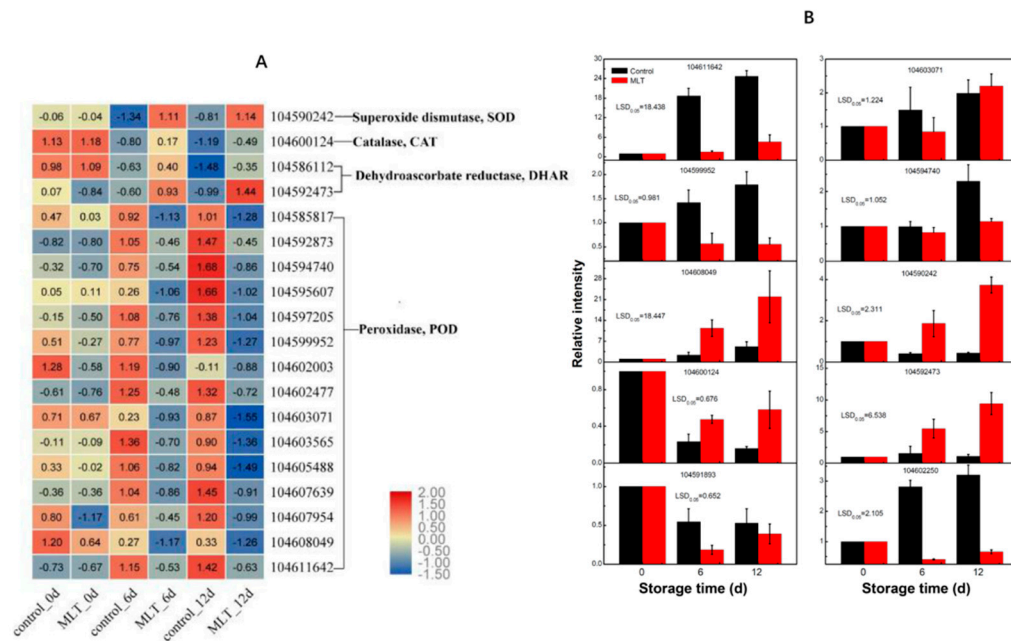

**Figure S3. The expression profiles of ROS metabolism-related candidate genes (A) and the qRT-PCR analysis of 10 DEGs (B).** Rows and columns in the heatmap indicate candidate genes and samples collected. The color scale at the right indicates the log<sub>2</sub> (FPKM) values. CAT, catalase; DHAR, dehydroascorbate reductase; FPKM, expected number of fragments per kilobase of transcript sequence per million base pairs sequenced; POD, peroxidase; SOD, superoxide dismutase. Relative gene expressions were normalized by comparison with the expression of lotus  $\beta$ -actin and analyzed using the  $2^{-\Delta\Delta CT}$  Method. The expression values were adjusted by setting the expression of 0d to be 1 for each gene. All qRT-qPCRs for each gene used three biological replicates, with three technical replicates per experiment; the error bars indicate SE.

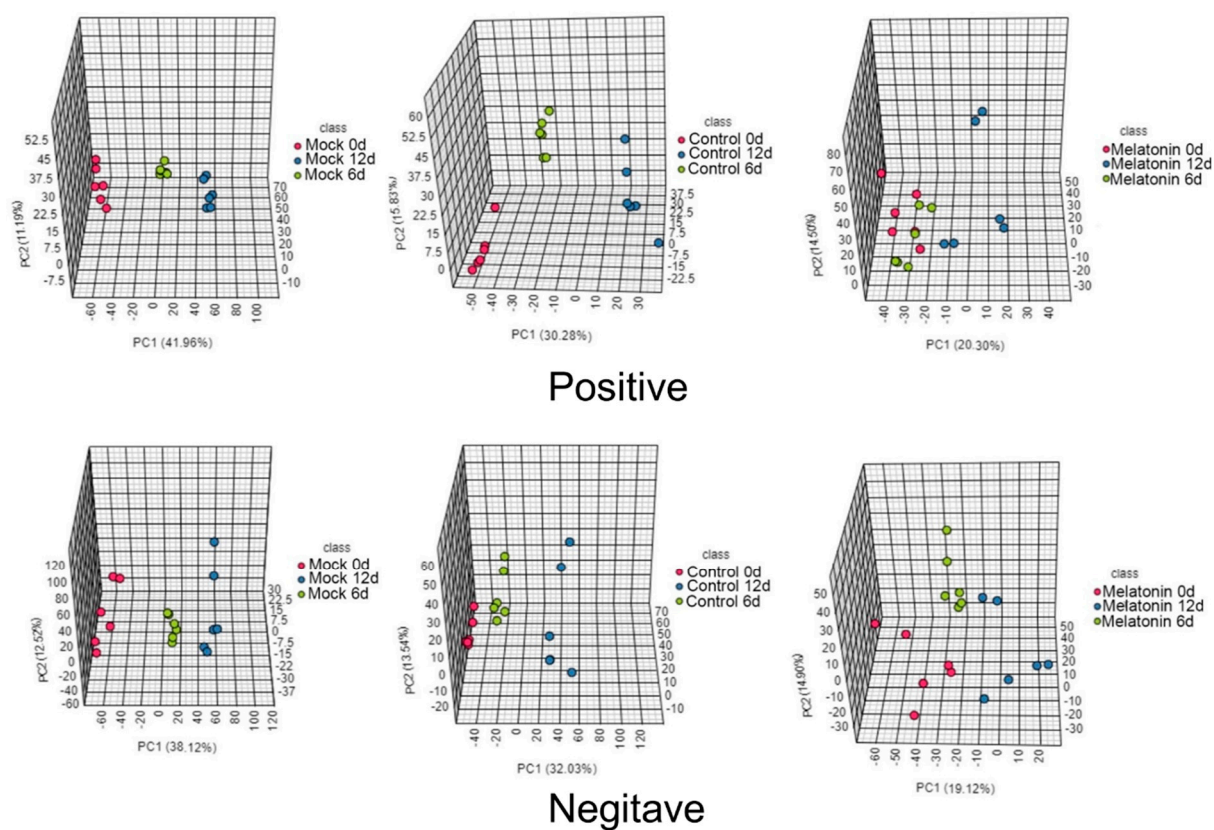

**Figure S4. PLS-DA analysis of metabolomics changes of the fresh-cut lotus roots treated by exogenous melatonin.**

## 6d vs 12d

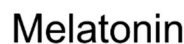

**Figure S5. Differential metabolite pathway analysis of up-induced compounds in different treatment.**

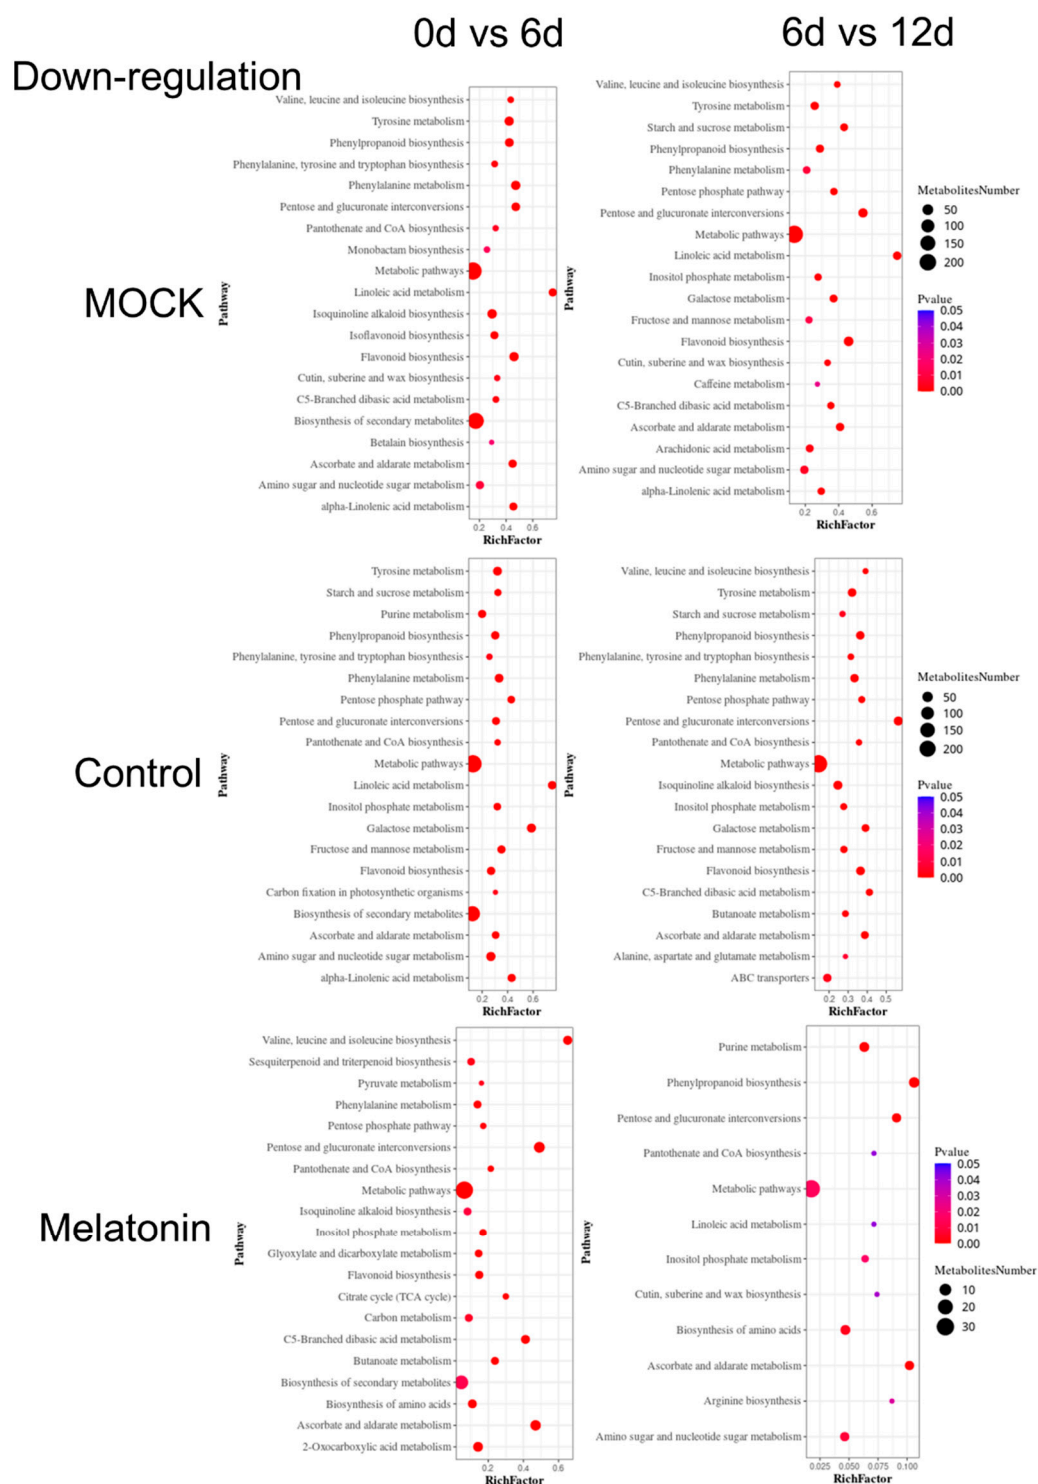

**Figure S6. Differential metabolite pathway analysis of down-induced compounds in different treatment.**

**Table S1.** Real-time PCR primers of genes.

| Gene ID        | Primers  | Sequence (5'-3')        |
|----------------|----------|-------------------------|
| 104611642      | Forward: | CCCCAACGTCGAAACCAT      |
|                | Reverse: | CACAGCCCTGAACAAAGCA     |
| 104603071      | Forward: | GGGAGTTGCTTTGGCTGTG     |
|                | Reverse: | TCCTATGCCGAATGTTGTGA    |
| 104599952      | Forward: | CCATCTGTTTCATCCTCTTGCTT |
|                | Reverse: | TCGCTTCTGATAATGCTTTCC   |
| 104594740      | Forward: | TATCGCCGTTAGGCTCTTGG    |
|                | Reverse: | GGTGGTGGCTCAGGTTTGTG    |
| 104608049      | Forward: | ATGCCCTCCTCAAAATCAACT   |
|                | Reverse: | CCTGCCATCGTCCACTCA      |
| 104590242      | Forward: | CTTGGAAGGGAGGACATG      |
|                | Reverse: | ACAGCAGTAAGAGGTGGCAGA   |
| 104600124      | Forward: | GCAGAGGCAGGTGCTTGA      |
|                | Reverse: | GCTCGTAGGGATTGGTGTCG    |
| 104592473      | Forward: | CCGACCAAGAGCGACCAT      |
|                | Reverse: | AAATCCACGCCTGAACCTAA    |
| 104591893      | Forward: | GTCTGTAGAGGAAGGGAGGGC   |
|                | Reverse: | AGCAGGAACAGCGGGGAG      |
| 104602250      | Forward: | GGAGCAACAGTGGAAGAAGG    |
|                | Reverse: | TCAAAGTAGTCGGGGAAGGTC   |
| $\beta$ -Actin | Forward: | ACCACTGCTGAACGGGAAAT    |
|                | Reverse: | GGATGGCTGGAATAGAACCTCA  |
