# Supplementary material for: Biochemical Mechanism of Fresh-Cut Lotus (Nelumbo nucifera Gaertn.) Root with Exogenous Melatonin Treatment by Multiomics Analysis
Source: Foods. 2022 Dec 22;12(1):44. doi: 10.3390/foods12010044 (PMC9818798; doi:10.3390/foods12010044)
Supplement: Supplementary file 1 [file foods-12-00044-s001.zip › Supplementary Table S2.xlsx]

## Sheet: average
Formula	Description	Pathway		Mock 0d	Mock 6d	Mock 12d	Control 0d	Control 6d	Control 12d	Melatonin 0d	Melatonin 6d	Melatonin 12d
C3H3ClO	trans-3-Chloroallyl aldehyde; trans-3-Chloro-2-propenal;	map00625 Chloroalkane and chloroalkene degradation; map01100 Metabolic pathways; map01120 Microbial metabolism in diverse environments		1.81349e+06	1.73576e+06	1.73845e+06	1.67026e+06	1.67957e+06	1.70498e+06	1.75601e+06	1.81394e+06	1.82547e+06
C3H5ClO	trans-3-Chloro-2-propene-1-ol; trans-3-Chloroallyl alcohol;	map00625 Chloroalkane and chloroalkene degradation; map01100 Metabolic pathways; map01120 Microbial metabolism in diverse environments		362595	347420	348817	337326	333281	342787	345656	373187	364803
C2H8AsNO3	2-Aminoethylarsonate; 2-Aminoethylarsonic acid;	NULL		385987	373097	377603	360562	362490	370445	379276	394101	391820
C5H5ClO3	2-Hydroxy-3-chloropenta-2,4-dienoate;	map00621 Dioxin degradation; map01220 Degradation of aromatic compounds		509929	491420	498421	468846	465799	483478	491035	529809	516891
C11H13NO2	Ephedroxane;	NULL		33076.9	34069.1	38550.2	46614.2	50761.9	63870.3	64947.4	64306	31180.4
C12H3Cl5O2	1,2,3,7,8-Pentachlorodibenzodioxin; 1,2,3,7,8-Pentachlorodibenzo-p-dioxin; 1,2,3,7,8-PeCDD; PCDD 54;	map00621 Dioxin degradation		186703	185250	169514	158716	163241	161315	166210	218448	174344
C6H3ClO4	cis-2-Chloro-4-carboxymethylenebut-2-en-1,4-olide; cis-2-Chlorodienelactone; cis-4-Carboxymethylene-2-chlorobut-2-en-4-olide;	map00361 Chlorocyclohexane and chlorobenzene degradation; map01100 Metabolic pathways; map01120 Microbial metabolism in diverse environments		62053.1	60754.6	60315.9	57791.2	58187.5	58606.8	61722.7	65567.4	62791.7
C4H9NOS	S-Acetylthioethanolamine;	NULL		400434	378214	383830	380823	385876	360787	395353	381523	400093
C12H19NO4	N-(3-Oxooctanoyl)homoserine lactone; N-(3-Oxooctanoyl)-L-homoserine lactone; OOHL;	map02024 Quorum sensing		63432.9	61976.2	60437.9	63162.4	62929.1	56505.6	64763.1	61048.9	63409
CuH2O2	Copper hydroxide;	NULL		5344.51	4631.28	4815.04	4312.38	4907.89	4830.28	5216.61	4709.94	5249.47
CH5AsO2	Methanearsonous acid; Methylarsonite;	NULL		4620.27	3781.82	4748.07	3941.93	4372.51	4260.53	5083.23	4252.8	5103.76
C12H6F2N2O2	Fludioxonil;	NULL		4960.77	5045.19	5130.59	5876.83	4993.49	4897.32	5294.14	5621.73	5102.22
C7H14O11P2	1,7-Diphospho-1-epi-valienol;	map00525 Acarbose and validamycin biosynthesis; map01130 Biosynthesis of antibiotics		11601.3	10412.5	10333.2	9682.08	10272	9761.97	11064.2	11204.7	10027
C16H10N2O6S4	DIDS; 4,4'-Diisothiocyanostilbene-2,2'-disulfonic acid;	NULL		30092.7	28284.6	30417.8	26365.2	30704	26392.8	37086.7	33707.5	27058.2
C9H8N2O2	Pemoline;	NULL		10513.1	9092.25	10626.1	11601.5	11864	10202.1	11874.3	11278.2	10835.6
C8H14N4S2	Thiaburimamide;	map07227 Histamine H2/H3 receptor agonists/antagonists		128226	123614	125562	127560	127717	121025	131633	136289	123518
C11H12N2O3	5-Hydroxy-L-tryptophan; Oxitriptan;	map00380 Tryptophan metabolism; map01063 Biosynthesis of alkaloids derived from shikimate pathway; map01100 Metabolic pathways; map04726 Serotonergic synapse		7762.11	7218.77	7481.71	7311.06	6855.94	6257.85	7192.43	7360.14	6958.48
Pu	Plutonium;	NULL		25426.8	20491.8	16675.2	24706.3	23259.6	22747.2	26163.4	23883.6	19440
C12H8Cl2O3S	Chlorfenson;	NULL		30149.4	30288.5	26482.7	27323.2	27257.9	30477.8	27435.8	29628.8	26192.2
C16H24N2O4	Ubenimex;	NULL		22571.2	20832.8	17293.1	21251.9	22851.6	23031.6	22033.2	22252.4	19415.2
C14H8Cl4	1,1-Dichloro-2,2-bis(4-chlorophenyl)ethylene; 1,1-Dichloro-2,2-bis(4'-chlorophenyl)ethylene; DDE;	map00621 Dioxin degradation; map01120 Microbial metabolism in diverse environments; map01220 Degradation of aromatic compounds		50623.4	54332.7	47287	49605.1	52428	52073.5	56198.7	55612.9	46889.8
C6H6FN	2-Fluoroaniline; o-Fluoroaniline;	NULL		4564.26	4275.99	5027.57	4714.3	4931.97	4731.21	5015.64	5664.21	5281.19
C7H5BrO3	3-Bromo-4-hydroxybenzoate;	NULL		856269	842218	651080	803253	731050	873830	619862	730184	670924
C4H7O6P	2-Oxo-4-phosphonobutanoate; 2-Oxo-4-phosphonobutanoic acid;	map00440 Phosphonate and phosphinate metabolism		17289.7	19323.5	16048.8	17096.5	18356.7	19081.9	16965.5	19194.8	14652
C7H12ClN5	Simazine;	NULL		10504.5	9891.52	5916.9	9501.53	11808.9	15310.9	12077.9	10269.6	8339.01
C5H11NS5	7-N,N-Dimethylamino-1,2,3,4,5-pentathiocyclooctane; PTCA;	NULL		5992.99	5961.39	4634.67	5422.42	5969.84	5519.59	5389.3	5587.72	5432.39
C9H9N3O2S2	Sulfathiazole;	NULL		5534.05	4948.53	3802.12	4816.98	4789.65	5096.85	5176.65	4966.34	3946.84
C6H6Cl2O5	2,4-Dichloro-3-oxoadipate;	map00361 Chlorocyclohexane and chlorobenzene degradation; map01120 Microbial metabolism in diverse environments		1.38102e+07	1.4818e+07	1.21926e+07	1.32703e+07	1.40461e+07	1.53648e+07	1.45409e+07	1.4845e+07	1.1809e+07
C20H34	14alpha-Methylsteroid;	NULL		80256.4	102286	69609.4	81427.2	98163.6	114886	103506	106359	64857.3
C9H10ClN2O5PS	Azamethiphos;	NULL		61900.9	71250.5	60054	62474.9	68088.2	73132.8	70901.1	71788.1	54584.7
C9H5I2NO	Iodoquinol;	NULL		73801.3	78530.3	62601.9	66300.7	64917.4	77557.5	61569.4	71258.5	62534.2
C33H54N6O20	N-Acetyl-D-glucosaminyl-N-acetylmuramoyl-L-Ala-D-glutamyl-6-carboxy-L-lysine;	NULL		14338.2	17654.1	10369.6	13104.8	9141.81	12002.5	12261.8	12763.6	12729.2
C42H52Cl2N6O8	Oxpoconazole fumarate;	NULL		34441.7	34420.4	21067.9	34154	27076.4	43181.3	16545.8	25109.3	21836.6
C36H54N7O19P	5-Methyl-H4SPT; 5-Methyl-tetrahydrosarcinapterin; 5-Methyltetrahydrosarcinapterin; N5-Methyl-tetrahydrosarcinapterin;	NULL		68956.4	76423	50265.2	74833.3	50151.3	73651.4	45284.1	61649.2	55845
C45H54N4O17	Precorrin 5;	map00860 Porphyrin and chlorophyll metabolism; map01100 Metabolic pathways		20041.3	16929.2	13222.6	17802.4	18415.8	25487.1	26638.2	18025.8	16563.1
CH4N2S	Thiourea;	NULL		9530.61	10086.7	8557.25	9171.14	9302.46	10270.8	9801.64	9651.98	8607.73
C37H62N7O17P3S	(6Z,9Z)-Hexadecadienoyl-CoA;	map01040 Biosynthesis of unsaturated fatty acids		10341.8	9898.75	8303.9	8150.88	8041.97	7807.88	10669.1	9236.57	6950.95
C6H2	Triacetylene; 1,3,5-Hexatriyne;	NULL		88101.3	76797.5	67355.3	76532.1	65003.5	72738.7	58912.1	63110.7	74735.7
C3H2ClN3O2	6-Chloro-1,3,5-triazine-2,4(1H,3H)-dione; 2-Chloro-4,6-dihydroxy-1,3,5-triazine;	NULL		98541.4	92741.5	79256.6	92022.6	81108.5	97191	71770.4	82149	83812.4
H4NO4P	O-Phosphorylhydroxylamine; O-Phosphonohydroxylamine;	NULL		12515.6	8031.33	14569	10294.6	10286.7	6491.33	11159	10956.1	13190.8
C7H6Cl2	2,4-Dichlorotoluene;	map00623 Toluene degradation; map01120 Microbial metabolism in diverse environments; map01220 Degradation of aromatic compounds		3.63783e+06	3.73876e+06	3.33184e+06	3.46685e+06	3.51688e+06	3.72662e+06	3.69586e+06	3.75214e+06	3.27612e+06
C5H8N2O4	3-Oxo-3-ureidoisobutyrate;	map00240 Pyrimidine metabolism		6026.23	6768.21	5400.64	5654.82	5454.55	7156.94	6185.06	6215.78	5541.33
C4H5CaNO4	Calcium L-aspartate;	NULL		108951	99632.4	99379.8	101221	96052.4	106346	97366.5	101318	102487
C5H11N2O7P	3-(Phosphoacetylamido)-L-alanine;	NULL		13163.5	13882.8	11290.1	13022.1	13608	13890.6	11514.9	13317.5	10773.6
C12H6Cl4O	2,3,4,5-Tetrachloro-4'-biphenylol; 4-Hydroxy-2',3',4'-5'-tetrachlorobiphenyl;	NULL		651025	590226	505982	575977	491693	620194	455407	514887	549679
C7H7Cl3NO3PS	Chlorpyrifos-methyl; Chloropyriphos-methyl;	NULL		43801	40699.5	41712.5	42207.1	34829	42823.5	33157.9	43330.9	44138.9
C8HCl4F3N2	4,5,6,7-Tetrachloro-2-trifluoromethylbenzimidazole;	NULL		20483.1	18463.4	14520.4	18513.3	13966.1	19261.1	9781	14261.8	14594.2
C16H11ClN2O3	Clorazepate; Clorazepic acid;	NULL		14166.1	7960.39	15824.8	17696.9	19951.4	10806.6	35704.9	27456.3	12924.2
C12H12As2Cl2N2O2	Salvarsan; Arsphenamine;	NULL		61885.3	59564	43664.3	52011.3	44539.6	66148.8	31143.7	39780.5	41802.8
O4STl2	Thallium sulfate;	NULL		90942.6	93755.7	79510.7	80809.2	71940	95837.7	67190.7	75964.9	77217.3
C15H14F3N5NaO7S	Flupyrsulfuron-methyl sodium;	NULL		69722.3	38525.1	71713.3	73096.4	93376.1	52081.6	110037	83943.7	74463.2
C14H10F4N4O7S	Primisulfuron;	NULL		8876.55	4035.47	8741.54	10602	11326.7	6606.38	15920	13068.7	10411.7
C27H50N3O8P	Cytarabine ocfosphate; Fosteabine;	NULL		2191.41	3283.4	1710.82	2603.31	1585.18	2470.14	1991.56	2389.71	1697.05
C23H22F7IN2O4S	Flubendiamide;	NULL		16844.5	6736.61	15853.6	19253.6	21344.9	11550.6	25715.5	22961.2	18093.3
C3H4N2	Pyrazole; 1,2-Diazole;	NULL		1501.4	1117.62	1074.42	1276.6	1537.52	1333.56	1144.24	1442.19	1213.39
C6H11N3O	L-Histidinol;	map00340 Histidine metabolism; map01100 Metabolic pathways; map01110 Biosynthesis of secondary metabolites; map01230 Biosynthesis of amino acids		244.842	371.697	859.67	476.721	1912.22	4809.23	807.088	675.716	1342.26
C6H13NO3	N-Hydroxy-L-isoleucine;	map00460 Cyanoamino acid metabolism; map01110 Biosynthesis of secondary metabolites		203465	108444	218200	219930	264580	137941	267262	226076	236866
C6H14N2O2	L-Lysine; Lysine acid; 2,6-Diaminohexanoic acid;	map00300 Lysine biosynthesis; map00310 Lysine degradation; map00780 Biotin metabolism; map00960 Tropane, piperidine and pyridine alkaloid biosynthesis; map00970 Aminoacyl-tRNA biosynthesis; map01060 Biosynthesis of plant secondary metabolites; map01064 Biosynthesis of alkaloids derived from ornithine, lysine and nicotinic acid; map01100 Metabolic pathways; map01110 Biosynthesis of secondary metab…		89220.5	45394	93702	97943.1	132393	60418.4	120201	100062	113205
C7H19N3	Spermidine; N-(3-Aminopropyl)-1,4-butane-diamine;	map00330 Arginine and proline metabolism; map00410 beta-Alanine metabolism; map00480 Glutathione metabolism; map00940 Phenylpropanoid biosynthesis; map01100 Metabolic pathways; map02010 ABC transporters; map04976 Bile secretion		106936	133378	122455	100076	92447.8	69289.7	89014.5	172873	107208
C11H11ClN5	Phenazopyridine hydrochloride;	NULL		15050.3	10335.3	14305.1	17159.5	17388.2	11413.5	16166.1	14425.1	16628.6
C6H5Cl3O	2,4,5-Trichloro-2,5-cyclohexadiene-1-ol; 1-Hydroxyl-2,4,5-trichloro-2,5-cyclohexadiene;	map00361 Chlorocyclohexane and chlorobenzene degradation; map01120 Microbial metabolism in diverse environments		258548	286205	233480	255961	222571	282979	255505	275992	219986
H2O4W	Tungstate; Tungstic acid;	NULL		5365.4	4586.33	4371.78	4894.5	5877.44	4612.71	5185.41	4701.49	6319.14
C10H16N2O4S	Biotin sulfoxide;	map00780 Biotin metabolism; map01100 Metabolic pathways		233809	117550	225902	262033	301284	166966	332078	282993	258759
C16H13ClN2O2	Temazepam;	NULL		12449.9	6400.96	12731	15199.8	18834.7	9082.88	20918.3	15707.3	15288.1
C16H12N2O	Sudan I; C.I. Solvent Yellow 14;	map05204 Chemical carcinogenesis		1275.26	761.799	1669.17	1853.35	1790.21	925.444	3449.31	2779.41	1380.1
C10H14NO5PS	Parathion; O,O-Diethyl O-p-nitrophenyl phosphorothioate; Thiophos; DNTP;	map00627 Aminobenzoate degradation; map01120 Microbial metabolism in diverse environments		12310.9	5059.1	11636.3	13027.2	15230.6	7686.29	14367.2	13096.3	13530.7
C15H16O6	Dihydromikanolide;	NULL		38400.7	15032.6	42365.9	36767.6	51647.5	18800.2	48479.5	37398.4	43129.1
C17H13ClN2O2S	L787257;	NULL		4252.41	2240.49	3932.7	5382.53	7190.29	2857.98	7676.2	6283.43	6225.75
C17H12O7	Aflatoxin G1;	map00254 Aflatoxin biosynthesis; map01130 Biosynthesis of antibiotics		185867	106739	170414	211730	254651	167441	270585	241121	189871
C14H13ClN6O5S	Imazosulfuron;	NULL		39277.6	19199.7	39426.4	39610.5	49238.6	26116	49071.8	42931.6	37388.4
C15H14N2Na2O6S2	Ticarcillin disodium; Aerugipen;	NULL		40288.4	15357.7	36831.9	47495.5	44498.6	26257.6	52827	50259.3	36840.6
C9H8I2O4	3-(3,5-Diiodo-4-hydroxyphenyl)lactate;	NULL		64138.3	61423.3	63809.7	57211.7	55029.9	58018.8	59699.4	55095.5	55248.9
C16H22N2O14P2	dTDP-2,6-dideoxy-D-glycero-hex-2-enos-4-ulose;	NULL		3905.84	1919.92	3521.93	2840.87	6819.56	2434.98	4971.47	2601.86	3104.79
C11H8N2O	Fuberidazole;	NULL		218605	121399	207525	243431	250290	165614	266650	243682	242154
C5H3Cl3O3	3-Chloro-4-(dichloromethyl)-5-hydroxy-2(5H)-furanone;	NULL		15350.4	17402.3	13715.9	15444.8	14709.2	16939.7	14849.5	16248.3	13412.5
C56H85NO13	Prorocentrolide;	NULL		39978.8	46526.7	34457.4	38307.1	32479.1	44487.3	45288.3	44429.1	36446.7
C57H87N7O15	Plitidepsin; Dehydrodidemnin B; Aplidine; Didemnin A;	NULL		96675.2	120073	76568.2	100987	77495	105044	71724.6	112583	81106.2
C6H14N2O2	(2R,3R)-3-Methylornithine; (3R)-3-Methyl-D-ornithine;	map00300 Lysine biosynthesis; map01120 Microbial metabolism in diverse environments		112438	55872.8	109091	122993	136151	85694.7	139363	125407	130133
C10H14BrCl3O	Costatol;	NULL		38065.2	32930.4	48520.5	22030.5	41059.4	24582.2	25790.2	13162.7	75214.7
C14H16ClO5PS	Coumaphos;	NULL		19251.7	12899.5	17521.5	24173	24388.2	13179.6	24759.5	24915	23118.8
C52H78N10O14	Nostopeptolide A2;	NULL		7519.61	9252.52	8345.03	6915.43	6243.33	8209.52	7569.72	8756.02	7331.46
C50H80N14O14S	Neurokinin A; Substance K; Neuromedin L;	NULL		17779.6	21029.5	13731.3	15056.6	15730.9	16866.8	14213.6	21291.6	16575.3
ClHO3	Chloric acid; Chlorate;	NULL		292391	334594	292447	266539	242862	290832	262744	270244	286468
CH3I	Methyl iodide;	NULL		35236.3	39018.9	35440.9	31478.5	27983.2	34419.6	30130.1	32206.9	33590.3
C7H5BrO4	3-Bromo-4,5-dihydroxybenzoate;	NULL		173146	199395	163749	170624	132416	183463	167530	187389	151036
C6H5IO	2-Iodophenol;	NULL		41448	40528.7	54870	28607.9	44079.6	29063.4	31055.2	23693.4	76063.8
C6H5Cl5	gamma-Pentachlorocyclohexene;	map00361 Chlorocyclohexane and chlorobenzene degradation; map01120 Microbial metabolism in diverse environments		990507	1.16159e+06	933117	988967	736834	1.08397e+06	962880	1.08846e+06	853852
C12H4Cl4O	2,3,7,8-Tetrachlorodibenzofuran; 2,3,7,8-TCDF; PCDF 83;	map00621 Dioxin degradation		13736.5	10956.9	13331.4	10158	13388.5	10917.5	9829.85	7117.05	21430.4
C10H6Cl4O4	Dacthal; Chlorthal-dimethyl; Dimethyl 2,3,5,6-tetrachloroterephthalate;	NULL		625468	666348	610514	540617	508725	578338	557045	548198	592026
C9H6I2O4	3,5-Diiodo-4-hydroxyphenylpyruvate; 3-(3,5-Diiodo-4-hydroxyphenyl)pyruvate;	NULL		167985	193049	166168	171306	131727	238580	164926	197352	147769
C16H9N4Na3O9S2	Tartrazine; Acid Yellow 23; Food yellow No.4;	NULL		21777.9	14565.5	21204.8	19854.9	19936.4	16105.7	21206.9	21480.3	15967.1
C46H94NO8P	2,3-Bis-(O-phytanyl)-sn-glycero-1-phospho-L-serine;	NULL		550065	688597	557833	530955	404509	629484	522624	601679	498481
C10H9ClN4S	Thiacloprid;	NULL		177802	107064	154118	174878	148998	126655	174862	193719	106383
C13H4Cl2F6N4O4	Fluazinam;	NULL		32211.3	16125.9	27010.3	29659.8	26946.7	18807.2	29307.6	29599.1	19597.3
C6H13N3O3	L-Citrulline; 2-Amino-5-ureidovaleric acid; Citrulline;	map00220 Arginine biosynthesis; map01100 Metabolic pathways; map01110 Biosynthesis of secondary metabolites; map01130 Biosynthesis of antibiotics; map01230 Biosynthesis of amino acids		56650.6	27373.7	51723.4	62857.5	58917.7	32522.4	69469.2	73094.4	39836.4
C13H8	Phenylheptatriyne; 1-Phenylhepta-1,3,5-triyne;	NULL		210042	218795	205763	175008	234158	172733	194053	167237	234563
C10H14N4S	6-(Pentylthio)purine; 6-Amylmercaptopurine;	NULL		384921	243015	333568	370886	343329	271884	385959	409781	256287
C16H10O4S	1-Pyrenylsulfate;	map00624 Polycyclic aromatic hydrocarbon degradation; map01120 Microbial metabolism in diverse environments		13699.3	7896	10009.4	13790.3	11640.4	8621.19	11833.2	15427.2	10946.5
C15H14Br2O2	Dibromobisphenol A; 3,3'-Dibromobisphenol A;	map00363 Bisphenol degradation; map01120 Microbial metabolism in diverse environments		114175	138147	96494.4	116314	96445.9	120567	107724	120911	95661.5
C10H14N4O12P2	XDP; Xanthosine 5'-pyrophosphate;	NULL		184509	104384	153276	198644	151787	121759	194287	218194	115148
C10H14Cl6N4O2	Triforine;	NULL		116561	139352	98232.8	120736	97179	135467	114929	126640	102031
C16H24N2O13P2	dTDP-4-oxo-2,3,6-trideoxy-D-glucose; dTDP-[(2R,6R)-tetrahydro-6-methyl-5-oxo-2H-pyran-2-yl] ester; dTDP-4-dehydro-2,3,6-trideoxy-alpha-D-hexopyranose;	map00523 Polyketide sugar unit biosynthesis; map01130 Biosynthesis of antibiotics		45029.4	23832.9	33748.4	37892.1	52355.4	18230.2	46287.1	36495	31860
C15H22N2O18P2	UDP-glucuronate; UDPglucuronate; UDP-D-glucuronate; UDP-alpha-D-glucuronate;	map00040 Pentose and glucuronate interconversions; map00053 Ascorbate and aldarate metabolism; map00520 Amino sugar and nucleotide sugar metabolism; map01100 Metabolic pathways		62137.4	31354	44702.2	54866	69981	29779.1	63611.2	54724.3	46141.2
C20H11N2Na3O10S3	Amaranth; Food red No.2;	NULL		35156.5	34825.9	25374.7	34549.4	36500.2	33302.6	37023.9	37562.5	26967.8
Cl6H42N14O2Ru3	Ruthenium red;	NULL		145493	143104	130407	152085	140192	151985	124229	157024	128339
C6H8N2O3	Imidazole lactate; Imidazole lactic acid; 2-Hydroxy-3-(1H-imidazol-5-yl)-propanoic acid;	map00340 Histidine metabolism		7491.48	6539.24	6794.25	7627.51	9787.26	8509.92	9789.52	7568.7	13764.6
C6H5NO4	4-Nitrocatechol;	map00627 Aminobenzoate degradation; map01120 Microbial metabolism in diverse environments		6577.74	7057.08	5678.32	5656.73	7482.43	3941.66	5483.3	4914.53	7741.3
C7H16N2O2	N6-Methyl-L-lysine;	NULL		6239.63	3857.97	5899.15	7746.6	11196.1	4971.21	10616.7	7543.72	9636.98
C10H10ClNO2	p-Chloroacetoacetanilide; 4'-Chloroacetoacetanilide;	NULL		7343.16	7595.63	8221.3	7000.91	8254.98	8817.71	9558.83	8205.64	15811.4
C6H14N4O2	L-Arginine; (S)-2-Amino-5-guanidinovaleric acid; L-Arg;	map00220 Arginine biosynthesis; map00261 Monobactam biosynthesis; map00330 Arginine and proline metabolism; map00331 Clavulanic acid biosynthesis; map00472 D-Arginine and D-ornithine metabolism; map00970 Aminoacyl-tRNA biosynthesis; map00999 Biosynthesis of secondary metabolites - unclassified; map01060 Biosynthesis of plant secondary metabolites; map01064 Biosynthesis of alkaloids derived from o…		38263.1	19018.1	36952.9	30797.6	35494.9	22067.8	34249.7	32605.3	29423.6
C16H14N2O	Methaqualone;	NULL		1.89051e+06	1.84794e+06	1.96482e+06	1.43973e+06	1.64599e+06	1.63258e+06	1.45713e+06	1.56381e+06	2.184e+06
C12H19BrN2O2	Neostigmine bromide; Neo proserine;	NULL		3.39066e+06	3.65578e+06	3.23592e+06	3.0695e+06	2.67181e+06	3.62549e+06	2.89851e+06	3.65757e+06	2.89406e+06
C11H19NO9	N-Glycolylmuramic acid; 2-Glycolylamido-3-O-[(R)-1-carboxyethyl]-2-deoxy-D-glucopyranose;	NULL		74598.4	68388.7	117260	54134.3	97991.6	89027.4	75332.4	57343.9	99172.7
C11H19NO2S4	Gerrardine;	NULL		10770.1	15903.2	9699.31	3584.23	2993.05	4836.76	4228.32	3956.66	7771.83
C14H17NO9	DIBOA-glucoside; 2,4-Dihydroxy-1,4-benzoxazin-3-one glucoside; (2R)-4-Hydroxy-3-oxo-3,4-dihydro-2H-1,4-benzoxazin-2-yl beta-D-glucopyranoside;	map00402 Benzoxazinoid biosynthesis		192046	161952	208403	182404	201379	230413	219636	202952	220436
C17H24O4	Trichodermin;	NULL		189067	84076.5	188531	158411	199011	111643	200631	164284	132879
C11H16N5O5+	N7-Methylguanosine;	NULL		459845	262844	422907	460156	441629	315576	555374	517437	256105
C12H6Cl4N2S	Chlorfensulphide; Azosulfide;	NULL		9516.26	6879.89	9030.8	6386.62	12599.6	5976.52	7725.05	4714.04	15664.7
C13H9Cl2F3N4OS	Ethiprole;	NULL		1.29044e+06	1.93591e+06	1.36607e+06	1.23215e+06	1.03773e+06	1.67622e+06	1.07173e+06	1.43242e+06	1.15144e+06
C14H6Cl2F4N2O2	Teflubenzuron;	NULL		287851	432013	306239	274645	234595	371737	240494	319227	257235
C7H16O13P2	D-glycero-alpha-D-manno-Heptose 1,7-bisphosphate;	map00540 Lipopolysaccharide biosynthesis		18901.7	44514.8	32792.5	17952	9333.41	42577	12103	23913.7	15403.1
C15H10ClF3N2O6S	Fomesafen;	NULL		152343	134000	135923	149124	137646	155689	140983	172818	147143
C10H14N4O10P2S	6-Mercaptopurine ribonucleoside 5'-diphosphate; 6-Thioinosine-5'-diphosphate;	map00983 Drug metabolism - other enzymes		32132	25483.6	33998.8	22915.7	31082.1	20685.3	26443.2	21343.9	52068.5
C18H14N2O10	Muscapurpurin;	NULL		27211.4	11206.5	17971.8	22719.4	31680	16133.7	23471.1	23970.2	21890.2
C13H15ClN6O7S	Halosulfuron-methyl;	NULL		87555.3	37105.1	63799.7	84102.6	76675.5	48429.7	87385.7	103850	55914.8
C26H26N2O6	(+)-Plicamine;	NULL		29373.5	19420.3	17555.3	21980.3	25958.2	20012	19749	24173	22712.2
C30H16O8	Hypericin;	NULL		65822.4	53972.3	70260.2	58785.8	58586.7	47654.2	60066.2	52949.5	66450.2
C41H28O26	Casuarictin;	NULL		56545.9	71771.9	62253.3	59113.2	48444.3	52715.8	57166.1	80417.9	65992.8
C5H11N3O	4-Guanidinobutanal;	map00330 Arginine and proline metabolism; map01100 Metabolic pathways		464403	283468	503000	502592	564240	319361	565411	549947	369410
C6H9N3O2	L-Histidine; (S)-alpha-Amino-1H-imidazole-4-propionic acid;	map00340 Histidine metabolism; map00410 beta-Alanine metabolism; map00970 Aminoacyl-tRNA biosynthesis; map01060 Biosynthesis of plant secondary metabolites; map01065 Biosynthesis of alkaloids derived from histidine and purine; map01100 Metabolic pathways; map01110 Biosynthesis of secondary metabolites; map01230 Biosynthesis of amino acids; map02010 ABC transporters; map04974 Protein digestion and…		614495	527096	671147	564677	793761	663911	728918	615970	906930
C10H13N	Actinidine; (-)-Actinidine;	map01066 Biosynthesis of alkaloids derived from terpenoid and polyketide; map01110 Biosynthesis of secondary metabolites		8630.77	7938.24	8667.89	9376.89	12346.4	7311.56	9655.1	7447.96	9415.41
C17H27NO7	Uplandicine; 7-Acetyl-9-echimidinylretronecine;	NULL		52950.2	8741.38	6485.22	65498.5	17737.6	3320.22	85630.5	15932.5	6888.35
C9H15N4O8P	1-(5'-Phosphoribosyl)-5-amino-4-imidazolecarboxamide; 5'-Phosphoribosyl-5-amino-4-imidazolecarboxamide; 5'-Phospho-ribosyl-5-amino-4-imidazole carboxamide; AICAR; 5-Aminoimidazole-4-carboxamide ribotide; 5-Phosphoribosyl-4-carbamoyl-5-aminoimidazole; 5-Amino-1-(5-phospho-D-ribosyl)imidazole-4-carboxamide; 5-Amino-1-(5-phospho-beta-D-ribosyl)imidazole-4-carboxamide;	map00230 Purine metabolism; map00340 Histidine metabolism; map01060 Biosynthesis of plant secondary metabolites; map01065 Biosynthesis of alkaloids derived from histidine and purine; map01100 Metabolic pathways; map01110 Biosynthesis of secondary metabolites; map01130 Biosynthesis of antibiotics; map04152 AMPK signaling pathway		6374.74	16353.8	12633.7	5294.27	4398.45	11508.6	4194.62	7743.77	6932.99
C4H8N2O	Gyromitrin; Acetaldehyde methylformylhydrazone;	NULL		3894.53	3366.65	4832.86	4155.5	6341.83	4172.52	5538.11	4536.76	6106.03
C5H6N2	4-Aminopyridine; 4-AP;	NULL		3467.88	3287.75	3858.99	3665.8	5156.63	4033.39	4765.87	3989.78	5852.81
C4H8N2O3	3-Ureidopropionate; 3-Ureidopropanoate; beta-Ureidopropionic acid; N-Carbamoyl-beta-alanine;	map00240 Pyrimidine metabolism; map00410 beta-Alanine metabolism; map00770 Pantothenate and CoA biosynthesis; map01100 Metabolic pathways		5.70523e+06	4.80848e+06	4.53486e+06	5.8539e+06	6.22387e+06	4.61013e+06	6.15412e+06	6.55902e+06	5.43037e+06
C4H7NO4	L-Aspartate; L-Aspartic acid; 2-Aminosuccinic acid; L-Asp;	map00220 Arginine biosynthesis; map00250 Alanine, aspartate and glutamate metabolism; map00260 Glycine, serine and threonine metabolism; map00261 Monobactam biosynthesis; map00270 Cysteine and methionine metabolism; map00300 Lysine biosynthesis; map00340 Histidine metabolism; map00410 beta-Alanine metabolism; map00460 Cyanoamino acid metabolism; map00710 Carbon fixation in photosynthetic organism…		2.36237e+06	2.25317e+06	1.81502e+06	1.7368e+06	1.88025e+06	1.25416e+06	1.85207e+06	1.65986e+06	1.62109e+06
C9H14N4O3	Carnosine; Nalpha-(beta-alanyl)-L-histidine;	map00340 Histidine metabolism; map00410 beta-Alanine metabolism; map01100 Metabolic pathways		26463.5	2394.94	3698.95	10637.3	1378.29	16193.3	9153.74	945.366	2038
C6H7O6P	(5-Formylfuran-3-yl)methyl phosphate; 2-Furaldehyde phosphate; 4-HFC-P; 4-(Hydroxymethyl)-2-furancarboxaldehyde phosphate;	map00680 Methane metabolism		212730	161164	205456	179911	240425	165672	196802	185311	265703
C12H10S2	4,4'-Biphenyldithiol; 4,4'-Dimercaptobiphenyl; 4,4'-Thiobiphenyl;	NULL		9886.02	5208.74	12518.2	5912.61	7467.79	6452.98	7161.29	7160.92	10416.7
OPb	Lead oxide;	NULL		69429.7	56894.5	69562.6	64580.6	60750.4	57825.4	67436.9	74528.3	68753.2
C11H22N5O6P	Rhizocticin A;	map00440 Phosphonate and phosphinate metabolism		11845.3	3045.9	14177.8	19967.3	25487.7	8459.12	17928.4	11770.4	21103.3
C12H23NO6S2	4-Methylthiobutyl-desulfoglucosinolate;	map00966 Glucosinolate biosynthesis; map01210 2-Oxocarboxylic acid metabolism		31147.9	18477.5	21619.2	32712.1	22661.6	20158.1	31012.7	27173.2	28112.7
C22H29N2O4+	Echitamine;	NULL		48268.7	36474.8	48987.5	66098.8	54413.9	53126.6	60317.7	69353.9	61575.8
C10H9Cl4O4P	Tetrachlorvinphos; 2-Chloro-1-(2,4,5-trichlorophenyl)vinyl dimethyl phosphate;	NULL		20369.5	33444.6	29720.4	13466.7	15209	20508.5	15316.8	15493.6	31152.3
C10H15N4O13P3	dITP; 2'-Deoxyinosine-5'-triphosphate; 2'-Deoxyinosine 5'-triphosphate;	map00230 Purine metabolism		97884.9	117688	77432.1	106742	59760.5	74808.4	84416.5	105221	80582.2
C10H16N4O17P4	Inosine 5'-tetraphosphate;	map00230 Purine metabolism		149708	208304	148599	152551	117942	174685	133817	163586	142917
C4H6N2O2	3-Cyano-L-alanine; L-3-Cyanoalanine; L-beta-Cyanoalanine;	map00460 Cyanoamino acid metabolism; map01100 Metabolic pathways; map01110 Biosynthesis of secondary metabolites		151389	122652	115270	161654	174484	112698	172492	179419	146686
C4H10N2O	N-Nitrosodiethylamine; NDEA; Diethylnitrosamine;	NULL		7200.03	4482.03	5218.21	6614.69	7156.43	6296.81	6697.49	8035.68	6961.53
C5H8N2O2	gamma-Amino-gamma-cyanobutanoate; 4-Amino-4-cyanobutanoic acid;	map00460 Cyanoamino acid metabolism		60822	49651.1	70370.3	65795.4	78145.7	80986.4	63897.8	66175.3	57280.9
C8H18O2	Octane-1,8-diol; 1,8-Octanediol;	NULL		10322.6	5317.65	10822.8	13088	12770.2	11263.5	17095.9	14588.6	11591.7
C5H10N2O3	L-Glutamine; L-2-Aminoglutaramic acid;	map00220 Arginine biosynthesis; map00230 Purine metabolism; map00240 Pyrimidine metabolism; map00250 Alanine, aspartate and glutamate metabolism; map00471 D-Glutamine and D-glutamate metabolism; map00630 Glyoxylate and dicarboxylate metabolism; map00910 Nitrogen metabolism; map00970 Aminoacyl-tRNA biosynthesis; map01060 Biosynthesis of plant secondary metabolites; map01100 Metabolic pathways; map…		57672.3	54408.2	61221.4	52212.1	57884.6	50807.6	53362.8	51196	72064
C6H6O7	Oxalosuccinate; Oxalosuccinic acid;	map00020 Citrate cycle (TCA cycle); map01100 Metabolic pathways; map01110 Biosynthesis of secondary metabolites; map01120 Microbial metabolism in diverse environments; map01130 Biosynthesis of antibiotics; map01210 2-Oxocarboxylic acid metabolism		44355.2	66459.9	28444.8	32688.8	20943	35445.4	29387.7	45001.3	41559.8
C7H14N2O4	C20914; Tabtoxin biosynthesis intermediate 4;	map00261 Monobactam biosynthesis; map01130 Biosynthesis of antibiotics		57903.8	28642.9	50535.7	49444.1	42644	36842.3	50668.2	31114.9	46133.4
C6H6NO3S-	Benzenamine sulfate;	NULL		20407.6	43604.4	13191.1	17503.3	8267.43	21382.1	14181.7	31335.4	13869.8
C16H24N2O	Oxymetazoline; Afrin;	NULL		3763.32	4772.62	3907.05	6220.44	2707.74	4619.76	4578.53	7430.25	5650.94
C9H6N2O8	3,5-Dinitro-4-hydroxyphenylpyruvate;	NULL		6472.5	5654.78	4341.14	7265.1	7089.94	8813.68	6260.4	6033.22	5532.02
C8H12N2O5	8-Hydroxyalanylclavam;	map01130 Biosynthesis of antibiotics		89006.8	68495.3	71802.6	91202.9	66161.2	37636.9	87178.7	91678.5	67439.8
C15H18O5	Isohelenol;	NULL		80320.3	62290.1	65946.5	79921.1	77618.6	64658.3	74631.2	80331.3	67516.2
C11H6Cl2N2	Fenpiclonil; 3-(2,3-Dichlorophenyl)-4-cyanopyrrole;	NULL		131227	98171.6	145483	125533	131554	135878	118557	130093	118628
C6H13O9P	1D-myo-Inositol 3-phosphate; D-myo-Inositol 3-phosphate; myo-Inositol 3-phosphate; Inositol 3-phosphate; 1D-myo-Inositol 3-monophosphate; D-myo-Inositol 3-monophosphate; myo-Inositol 3-monophosphate; Inositol 3-monophosphate; 1L-myo-Inositol 1-phosphate; L-myo-Inositol 1-phosphate;	map00521 Streptomycin biosynthesis; map00562 Inositol phosphate metabolism; map01100 Metabolic pathways; map01130 Biosynthesis of antibiotics; map04070 Phosphatidylinositol signaling system		32266.3	63517.8	81075.5	32711.7	73031.9	68423.7	31759.1	18822.9	44706.6
C17H18O4	7,3'-Dihydroxy-4'-methoxy-8-methylflavan;	NULL		695389	422875	768465	767603	812717	525386	876724	762892	663326
C9H19O11P	2-(alpha-D-Galactosyl)-sn-glycerol 3-phosphate;	NULL		135304	59878.1	113079	167700	169617	145725	125021	63044.8	66631.7
C9H7IO4	3-Iodo-4-hydroxyphenylpyruvate;	NULL		34583.6	55342.7	31050.8	29142.6	15887.4	38190.9	23664.9	38498.4	26894.4
C9H19O11P	sn-Glycero-3-phospho-1-inositol; 1-(sn-Glycero-3-phospho)-1D-myo-inositol;	NULL		113111	32631.6	145577	125969	197106	34129.1	269322	117178	107919
C13H10ClN2NaO4S	Pyrithiobac-sodium; Pyrithiobac sodium;	NULL		30926.1	32643.7	25889.3	25658.1	11289.4	21540.5	18042	37236.6	17733.8
C12H3Cl7	2,3,3',4,4',5,5'-Heptachlorobiphenyl; PCB 189;	map00621 Dioxin degradation		125629	96908.6	121454	122787	127443	107854	125135	121503	144305
C9H4Cl8O	Isobenzan; Telodrin;	NULL		135199	123566	119617	151595	116243	134516	141492	164172	131420
C21H22O11	Neoastilbin; (2S,3S)-Taxifolin 3-rhamnoside;	NULL		3400.23	3758.07	7489.44	5454.48	6142.51	8850.02	3749.81	3790.49	2510.09
C19H33N3O14P2	dTDP-4-dimethylamino-4,6-dideoxy-5-C-methyl-D-allose;	map00523 Polyketide sugar unit biosynthesis; map01059 Biosynthesis of enediyne antibiotics; map01130 Biosynthesis of antibiotics		3270.36	2848.54	6149.76	2920.23	5520.9	2864.3	8563.47	3192.82	6029.02
C35H32MgN4O6	Chlorophyllide b;	map00860 Porphyrin and chlorophyll metabolism; map01100 Metabolic pathways; map01110 Biosynthesis of secondary metabolites		85020.2	66414.5	73343.3	84065.1	87961.5	46518.2	82489.6	87573.4	72761.8
C3H8N2O2	L-2,3-Diaminopropanoate; L-2,3-Diaminopropionate; L-2,3-Diaminopropionic acid; L-2,3-Diaminopropanoic acid; 3-Amino-L-alanine; (S)-2,3-Diaminopropanoate;	NULL		150171	136842	113604	148330	177525	110921	164260	158130	141150
C3H8N2O	N,N'-Dimethylurea; 1,3-Dimethylurea;	map00232 Caffeine metabolism; map01120 Microbial metabolism in diverse environments		3138.35	3130.54	2519.45	1971.49	2409.15	1963.84	2352.85	3516.5	2509.01
C5H10O	Prenol; Prenyl alcohol; 3-Methyl-2-buten-1-ol;	NULL		5.65178e+06	4.99599e+06	6.05533e+06	6.68542e+06	6.49165e+06	6.43783e+06	6.32822e+06	5.91624e+06	6.78474e+06
C2H5O4P	Phosphonoacetaldehyde; 2-Phosphonoacetaldehyde; 2-Oxoethylphosphonate;	map00440 Phosphonate and phosphinate metabolism; map01100 Metabolic pathways; map01120 Microbial metabolism in diverse environments; map01130 Biosynthesis of antibiotics		9625.58	2484.77	2371.05	10934.4	4578.61	2216.35	12314.7	2548.06	1911.17
C5H7NO3	4-Oxoproline; 4-Oxo-L-proline;	map00330 Arginine and proline metabolism		1.15984e+07	9.6345e+06	1.38578e+07	1.22693e+07	1.53693e+07	1.16779e+07	1.28167e+07	1.11477e+07	1.11582e+07
C5H11O4P	Isopentenyl phosphate;	map00900 Terpenoid backbone biosynthesis; map01110 Biosynthesis of secondary metabolites; map01130 Biosynthesis of antibiotics		1.63064e+06	552249	493921	1.9057e+06	796876	534520	2.04552e+06	509853	438858
C6H13O8P	2-Deoxy-D-glucose 6-phosphate;	NULL		6910.28	3476.53	2401.85	7097.15	5792.69	4791.28	7135.57	7255.27	4327.22
C15H14NO2PS	Cyanofenphos;	NULL		21265.8	20696.6	15219.3	15739.6	7003.42	7559.09	14061.9	20388.7	13503.8
C7H15O10P	D-glycero-alpha-D-manno-Heptose 1-phosphate;	map00540 Lipopolysaccharide biosynthesis		1849.82	6670.88	6353.75	3408.59	6731.09	10126.3	4108.15	1711.15	4289.96
C18H14O4	Dehydrocycloguanandin;	NULL		29148.5	25758.5	33630.4	28320.8	27825.7	27929.8	27439.4	29460.2	25566.4
C18H14N4O5S	Sulfasalazine; Salicylazosulfapyridine; Salazosulfapyridine;	NULL		18154.3	12716.6	17309.6	15990.9	16506.9	12683.3	17149	16171.8	11037.7
C10H15N5O9P2	dADP; 2'-Deoxyadenosine 5'-diphosphate;	map00230 Purine metabolism; map01100 Metabolic pathways		14201	8451.78	10658.3	14005.7	15858.1	8692.59	14488.6	12615.4	15269.1
C4H6O3	2-Methyl-3-oxopropanoate; 3-Oxo-2-methylpropanoate; Methylmalonate semialdehyde;	map00280 Valine, leucine and isoleucine degradation		333879	357769	334601	288959	238785	258447	285679	331044	286239
C4H11NO3	Tromethamine; 2-Amino-2-(hydroxymethyl)-1,3-propanediol; Trometamol;	NULL		72264.5	56873.2	44479.1	124099	132430	44508.4	66566.6	43933.9	29568.4
C4H9NO3	L-Threonine; 2-Amino-3-hydroxybutyric acid;	map00260 Glycine, serine and threonine metabolism; map00261 Monobactam biosynthesis; map00290 Valine, leucine and isoleucine biosynthesis; map00860 Porphyrin and chlorophyll metabolism; map00970 Aminoacyl-tRNA biosynthesis; map01060 Biosynthesis of plant secondary metabolites; map01100 Metabolic pathways; map01110 Biosynthesis of secondary metabolites; map01120 Microbial metabolism in diverse env…		10590.3	6294.79	6049.24	10425.9	10368.4	5478.86	12291.8	10433.3	11916.1
C5H9NO4	L-Glutamate; L-Glutamic acid; L-Glutaminic acid; Glutamate;	map00220 Arginine biosynthesis; map00250 Alanine, aspartate and glutamate metabolism; map00330 Arginine and proline metabolism; map00332 Carbapenem biosynthesis; map00340 Histidine metabolism; map00430 Taurine and hypotaurine metabolism; map00471 D-Glutamine and D-glutamate metabolism; map00480 Glutathione metabolism; map00524 Neomycin, kanamycin and gentamicin biosynthesis; map00630 Glyoxylate a…		1.25535e+06	983935	875528	1.99052e+06	2.02038e+06	825660	1.21369e+06	891266	628525
C6H12N2O4	Ethylenediamine-N,N'-diacetic acid; Ethylenediaminediacetate; EDDA;	NULL		17176.3	14096	11295.1	31949.2	52442.5	38050.3	24205.8	43402	39843.8
H4O7P2	Diphosphate; Diphosphoric acid; Pyrophosphate; Pyrophosphoric acid; PPi;	map00190 Oxidative phosphorylation; map05012 Parkinson disease		14651.5	15925.2	11497.2	19163.7	25790.5	47184	22534.3	18165.1	18132.1
C7H12N2O4	Tabtoxinine-delta-lactam;	map00261 Monobactam biosynthesis; map01130 Biosynthesis of antibiotics		785.756	2617.51	6652.07	906.682	5555.1	10603.1	860.275	629.236	1221.75
C7H10O8	3-Deoxy-lyxo-heptulosaric acid; 3-Deoxy-D-lyxo-hept-2-ulopyranosaric acid;	NULL		19169.8	25791	14462.8	16114.6	11948.7	11227.3	11834.5	21204.3	17124.8
C6H10CaO4	Calcium propionate;	NULL		11173.3	18940.6	5552.9	11178.8	5040.67	4969.36	8926.74	17054.6	9101.39
C6H13O9P	D-Fructose 1-phosphate;	map00051 Fructose and mannose metabolism; map00400 Phenylalanine, tyrosine and tryptophan biosynthesis; map01100 Metabolic pathways; map01120 Microbial metabolism in diverse environments; map02060 Phosphotransferase system (PTS)		3.64855e+06	4.36767e+06	5.0842e+06	3.62067e+06	5.46286e+06	5.8898e+06	3.92876e+06	2.52852e+06	3.18192e+06
C16H11ClN4	Estazolam;	NULL		64483.3	67720	57678.4	60865.1	52183.4	66287.2	57418.2	72812.4	63135.7
C14H14N2O4S	Phenazine methosulfate; N-Methylphenazonium methosulfate; 5-Methylphenazinium methyl sulphate;	NULL		185658	188859	228236	154728	91639.2	115129	176992	155895	123403
C14H20N2O4S	Penicillin F; 2-Pentenylpenicillin;	NULL		23182.2	21172	36607.3	12764.1	35918.5	43287.1	14801.1	16962.2	14462.1
C7H15O9P	5-epi-Valiolol 7-phosphate;	map00525 Acarbose and validamycin biosynthesis; map01130 Biosynthesis of antibiotics		21781.4	50219.9	73483.2	28436.4	77748.1	117112	35550.8	21568.7	51786.3
C20H19FO3	2,2,4-Trimethyl-3-(4-fluorophenyl)-2H-1-benzopyran-7-ol acetate;	NULL		12342.6	8168.26	29177.9	6781.14	26471	35976.5	6035.72	5777.77	9019.85
C10H13BrCl4	Violacene;	NULL		6246.22	6288.78	3493.73	8597.81	8456.62	14910.7	8863.71	7751.02	9435.92
C11H15Cl2O2PS3	Phenkapton;	NULL		12237.7	14081.4	7970.63	11273.7	3530.26	9853.19	9950.66	15454.5	8167.84
C12H2Cl6O	1,2,3,4,7,8-Hexachlorodibenzofuran; 1,2,3,4,7,8-HxCDF; PCDF 118;	map00621 Dioxin degradation		83813.1	78108.2	71613.9	100403	92480.2	116101	103021	95731.9	108646
C23H22O5	Isouvaretin; 1-(4,6-Dihydroxy-3-((2-hydroxyphenyl)methyl)-2-methoxyphenyl)-3-phenyl-1-propanone;	NULL		69123.4	34081	36264.4	80718.7	35248.6	17910.9	62716.9	91607.8	39245.4
C12H4Cl2F6N4OS	Fipronil;	NULL		137791	133166	126568	153501	120579	142554	116117	143351	113752
C11H13ClF3N3O4S3	Polythiazide;	NULL		44648	52372.1	33148	38208.3	18834.4	27447.9	27193.8	47188.2	30499.4
C20H21N4O5S2+	SM-17466;	NULL		22531.5	11206.8	27072.1	24867	46453.6	17669.5	32007.3	15071.7	22479.9
C26H28O15	Carlinoside;	NULL		307934	196386	363580	301973	401472	250396	412772	270741	292489
C4H7NO2	Diacetylmonoxime; 2,3-Butanedione monoxime;	NULL		95240.7	79680.6	97578.9	117283	149641	94166.7	98181.3	81288.5	84852.9
C12H10OS2	5-(4-Hydroxybut-1-ynyl)-2,2'-bithiophene; 3-Butyn-1-ol, 4-(5-(2-thienyl)-2-thienyl)-;	NULL		675.375	19235.7	17961.9	327.096	703.813	11526.9	1010.88	2530.92	3295.19
C8H15N3O7	Streptozocin; Zanosar;	NULL		68644.7	53234.9	41952.1	52208.8	30106.2	22680.3	52837	62053.4	41869.6
C11H17NO6	Proacacipetalin; 3-Butenenitrile, 2-(beta-D-glucopyranosyloxy)-3-methyl-, (S)-;	NULL		22303.1	29812.3	39372.2	25610.6	35279.4	20008.4	31578.8	41518.2	36312.6
C14H14O9	Sinapoyltartronate;	NULL		20607.4	46930.2	42014.2	19690.4	20190.2	41559.2	19725.7	29342.8	29221.1
C4H6O4	Methylmalonate; Methylmalonic acid;	map00240 Pyrimidine metabolism; map00280 Valine, leucine and isoleucine degradation; map00640 Propanoate metabolism		62095.5	186231	198907	57806.9	89526.7	204314	57819.3	93291	147601
C4H8O4	D-Erythrose;	NULL		2.35806e+06	1.9788e+06	1.45458e+06	2.12734e+06	1.72693e+06	1.73042e+06	1.94302e+06	2.14494e+06	1.68305e+06
C5H8O5	L-Arabinono-1,4-lactone; L-Arabonolactone;	map00053 Ascorbate and aldarate metabolism; map01100 Metabolic pathways		283662	628370	1.19631e+06	242582	357313	915686	224356	392421	377991
C6H10O6	D-Glucono-1,5-lactone; Gluconic lactone; Gluconic acid lactone; 1,5-Gluconolactone; delta-Gluconolactone; D-Gluconolactone; Gluconolactone;	map00030 Pentose phosphate pathway; map01100 Metabolic pathways; map01110 Biosynthesis of secondary metabolites; map01120 Microbial metabolism in diverse environments; map01130 Biosynthesis of antibiotics; map01200 Carbon metabolism		79862.8	152676	289240	77421.9	116402	250414	73651.6	106985	105349
C3H9O6P	sn-Glycerol 3-phosphate; Glycerophosphoric acid; D-Glycerol 1-phosphate;	map00561 Glycerolipid metabolism; map00564 Glycerophospholipid metabolism; map01100 Metabolic pathways; map01110 Biosynthesis of secondary metabolites; map02010 ABC transporters; map05231 Choline metabolism in cancer		15358.7	16285.4	25253.7	20798.4	33141.1	36805.7	14396.8	6060.59	14341.4
C5H11N3O	(R)-Piperazine-2-carboxamide;	NULL		7226.75	4086.09	12713.6	6862.73	6102.41	4537.13	8907.64	17620.2	8304.86
C6H12O7	2-Carboxy-D-arabinitol;	NULL		46486.9	227781	545881	40555.4	119398	413108	44680.2	112452	133830
C6H12O6	L-Fuconate;	map00051 Fructose and mannose metabolism; map01120 Microbial metabolism in diverse environments		1.6822e+06	2.14939e+06	3.20311e+06	943352	2.18247e+06	3.61582e+06	950261	660211	1.3026e+06
C3H10N6S2	Bisthiosemi;	NULL		115343	132203	159729	122823	165211	200896	123029	98277.4	129232
C16H10O4	Phenanthrene-4,5-dicarboxylate;	map00624 Polycyclic aromatic hydrocarbon degradation; map01120 Microbial metabolism in diverse environments		46689.5	35844.2	30359.3	43002.8	28642.8	30940.4	47598.8	53326.9	32544.5
C4H7Cl2O4P	Dichlorvos; 2,2-Dichloroethenyl dimethyl phosphate; DDVP;	NULL		31781.6	35421.4	21479	30237.8	9983.92	8853.42	30907.1	40799.4	27739
C5H13O8P	D-Ribitol 5-phosphate; Ribitol 5-phosphate; L-Ribitol 1-phosphate;	map00040 Pentose and glucuronate interconversions; map00515 Mannose type O-glycan biosynthesis; map01100 Metabolic pathways		221613	219838	430081	106387	317131	774658	107075	81923.8	157535
C14H13Cl2NO	2-Amino-1,2-bis(p-chlorophenyl)ethanol;	NULL		60290.3	31992.5	22066.1	62931.5	31955.7	26679	66028.5	32622	22137.9
C9H11F2N3O4	Gemcitabine;	NULL		111201	96862.6	72770.7	108762	89408.6	65918	106980	118117	102522
C14H13ClO2S	Tos-Ph-CH2Cl;	NULL		18894	93185.1	137899	16435.3	32785.3	80412.9	17331.9	55442.9	88444.7
C5H10O10P2	alpha-D-Ribose 1,2-cyclic phosphate 5-phosphate; 5-Phospho-alpha-D-ribose 1,2-cyclic phosphate;	map00440 Phosphonate and phosphinate metabolism		31998	35931.6	21356.9	26309.3	10699.9	11283.8	27844.9	35643	30486.7
C14H16O9	Bergenin;	NULL		18560.4	17351.6	17030.6	19145.2	12966.5	14500.2	18584	40947.4	15422.4
C18H22O4	Prosolanapyrone III; 4-Methoxy-2-oxo-6-(1E,7E,9E)-undeca-1,7,9-trien-1-yl-2H-pyran-3-carboxaldehyde;	NULL		1199.07	1456	850.281	7016.55	40949.3	31651.7	4328.19	5675.16	10184.3
C5H12O11P2	D-Ribose 1,5-bisphosphate; Ribose 1,5-bisphosphate; alpha-D-Ribose 1,5-bisphosphate;	map00030 Pentose phosphate pathway; map00440 Phosphonate and phosphinate metabolism		32054.5	19254.1	15401.4	34963.4	14484.8	10367.8	33310.4	34308.3	27263.2
C16H18O9	Biflorin;	NULL		1.1332e+06	2.63577e+06	2.52094e+06	1.36212e+06	2.92025e+06	2.49969e+06	1.43856e+06	2.56182e+06	2.1305e+06
C8H20O5P2S2	Sulfotep;	NULL		516221	412754	882310	540294	1.08142e+06	483124	812379	344200	479229
C11H13Cl3N2O3	Fenuron-TCA; Fenuron TCA;	NULL		23592.2	17009.4	21009.3	17323.8	27987.6	24223	18671.1	15946.3	27499.6
C16H18O10	Fraxin;	NULL		419265	295825	75648.3	537552	295502	136488	534402	728447	387796
C19H17N3O7	Nocardicin E;	map00261 Monobactam biosynthesis; map01130 Biosynthesis of antibiotics		174195	502189	486607	219841	549316	480718	244785	489343	454836
C19H12Cl3N3OS	CITCO; 6-(4-Chlorophenyl)imidazo[2,1-b][1,3]thiazole-5-carbaldehyde O-(3,4-dichlorobenzyl)oxime;	NULL		69042.8	71844.5	54439.4	64448	49719.3	53811.9	51115.9	78323.8	60444.1
C14H10N6O9	4,4',6,6'-Tetranitro-2,2'-azoxytoluene;	map00633 Nitrotoluene degradation		56445.9	52182.4	45739.1	49392.9	36871.9	24799.4	52151.5	38598.6	30173.2
C19H24Cl2O7	Chlorohyssopifolin A;	NULL		56620.9	48244.8	49534.7	44795.3	60722.4	41095.3	58438.1	37990.3	47637.9
C18H18N6O8S3	Cefonicid;	NULL		28251.7	48628.2	39210.5	30278.2	47652.4	43365.9	28717.8	17395.7	41808.6
OZn	Zinc oxide;	NULL		2667.4	3353.25	3129.28	2723.06	3259.47	3759.34	2758.95	2492.36	3006.76
C3H4O4	2-Hydroxy-3-oxopropanoate; Tartronate semialdehyde;	map00053 Ascorbate and aldarate metabolism; map00630 Glyoxylate and dicarboxylate metabolism; map01100 Metabolic pathways		2419.01	45160.9	35594.7	1792.38	11757.4	15400	2257.98	107541	333632
CH5O4P	Hydroxymethylphosphonate; P-(Hydroxymethyl)-phosphonic acid;	map00440 Phosphonate and phosphinate metabolism; map01130 Biosynthesis of antibiotics		471975	467240	367040	459372	263922	370181	464684	524893	406897
C5H12N2O2	L-Ornithine; (S)-2,5-Diaminovaleric acid; (S)-2,5-Diaminopentanoic acid; (S)-2,5-Diaminopentanoate;	map00220 Arginine biosynthesis; map00330 Arginine and proline metabolism; map00472 D-Arginine and D-ornithine metabolism; map00480 Glutathione metabolism; map00999 Biosynthesis of secondary metabolites - unclassified; map01060 Biosynthesis of plant secondary metabolites; map01064 Biosynthesis of alkaloids derived from ornithine, lysine and nicotinic acid; map01100 Metabolic pathways; map01110 Bio…		7581.89	6336.05	17024.7	8042.09	12461	9110.35	8653.88	13123.7	9709.62
C5H4O2	Furfural; 2-Furaldehyde;	map00365 Furfural degradation; map01120 Microbial metabolism in diverse environments		3303.95	8650.95	18758.9	3433.86	6601.68	15801.5	2869.48	4130.19	5616.16
C6H7NO3	2-Aminomuconate semialdehyde; 2-Aminomuconate 6-semialdehyde;	map00380 Tryptophan metabolism; map00627 Aminobenzoate degradation; map01100 Metabolic pathways; map01120 Microbial metabolism in diverse environments		150502	131839	520784	331469	685465	504821	278926	616032	571818
C6H8O4	2-Hydroxy-2-(hydroxymethyl)-2H-pyran-3(6H)-one; Microthecin;	NULL		66051.7	60162.6	81876.9	63259.1	72069.6	86781	62628.8	54715.8	54453.7
C6H7N5O	3-Methylguanine; 2-Amino-3,7-dihydro-3-methyl-6H-purin-6-one;	NULL		563669	524229	497942	844064	993839	372793	468610	280591	227693
C6H10O5	L-Fucono-1,5-lactone;	map00051 Fructose and mannose metabolism; map01120 Microbial metabolism in diverse environments		46781.5	43887.6	55339.7	35231.6	46484.7	60495	36788	36670.2	40947.9
C7H8N4O2	Theophylline; 1,3-Dimethylxanthine;	map00232 Caffeine metabolism; map01060 Biosynthesis of plant secondary metabolites; map01065 Biosynthesis of alkaloids derived from histidine and purine; map01100 Metabolic pathways; map01110 Biosynthesis of secondary metabolites; map01120 Microbial metabolism in diverse environments		666913	1.2078e+06	1.70839e+06	321702	617122	1.99421e+06	346093	228910	620294
C3H7O7P	3-Phospho-D-glycerate; D-Glycerate 3-phosphate; 3-Phospho-(R)-glycerate; 3-Phosphoglycerate;	map00010 Glycolysis / Gluconeogenesis; map00030 Pentose phosphate pathway; map00260 Glycine, serine and threonine metabolism; map00561 Glycerolipid metabolism; map00630 Glyoxylate and dicarboxylate metabolism; map00680 Methane metabolism; map00710 Carbon fixation in photosynthetic organisms; map01060 Biosynthesis of plant secondary metabolites; map01061 Biosynthesis of phenylpropanoids; map01062 …		14569.6	25936.8	68322.8	16511.3	24329.4	42145.7	8430.48	4405.67	6711.27
C7H16N4O2	Homoarginine; L-Homoarginine;	NULL		452235	362159	469643	404076	522409	460523	420722	364138	418203
C5H8O6	2-Dehydro-D-xylonate;	NULL		5.67607e+06	3.29415e+06	4.47515e+06	5.20067e+06	5.98617e+06	5.28634e+06	5.05389e+06	3.4634e+06	3.42874e+06
C8H15N3O4	N-Acetyl-L-citrulline;	map00220 Arginine biosynthesis; map01100 Metabolic pathways; map01230 Biosynthesis of amino acids		3328.18	3608.12	3531.91	3373.52	122142	4163.77	3386.92	3395.73	3401.39
C2H5AsO5	Arsonoacetate;	NULL		13693	5659.6	11965	11032.3	21322.4	3900.32	20191.5	9131.2	20936.5
C7H15N3O2S2	Cartap;	NULL		1561.3	3120.82	9133.54	1027.14	1226	3875.25	1126.54	2172.32	3280.13
C8H16N2O5	N-Acetyl-beta-D-glucosaminylamine;	NULL		24830.9	18390.2	13214.4	27321.4	21172.2	21666.1	22698.5	14659.5	15170.6
C8H8N4O4	Nifuradene; 1-[(5-Nitrofurfurylidene)amino]-2-imidazolidinone;	NULL		7.47714e+06	5.91277e+06	6.73316e+06	7.56252e+06	7.27762e+06	7.60978e+06	6.8745e+06	5.39747e+06	5.04657e+06
C13H11NO4	Haplopine; Heliparvifoline;	NULL		23534.3	12512.7	25741.1	25878.7	26420.5	23599.2	19881.8	15372.1	17853.9
C3H7O9PS	(2R)-O-Phospho-3-sulfolactate; (2R)-Phosphosulfolactate;	map00680 Methane metabolism; map01120 Microbial metabolism in diverse environments		27093.3	19373.9	10199.1	24791.2	15862.5	14668.9	23607.9	19689.8	19793.9
C7H8N4O3	3,7-Dimethyluric acid;	map00232 Caffeine metabolism		3645.49	107507	195028	2364.71	8644.33	138305	2439.21	19956.1	30366.2
C7H14O6	Methyl beta-D-galactoside; Methyl beta-D-galactopyranoside;	map02010 ABC transporters		178125	169558	131882	166176	149054	201112	150690	150102	146906
C11H14O2S	Thiolactomycin;	NULL		118754	134149	187082	126670	101051	155637	134505	132632	109683
C6H10O8	D-Galactarate; D-Mucic acid; D-Galactaric acid; Galactaric acid; Galactarate; Mucic acid;	map00053 Ascorbate and aldarate metabolism		9044.94	11207.2	7211.51	6023.16	2257.33	6629.43	6634.96	8207.14	6902.27
C10H13N5O4	Deoxyguanosine; 2'-Deoxyguanosine;	map00230 Purine metabolism; map01100 Metabolic pathways		81471.5	74529.1	100218	46446.3	92910	182576	61298.8	74369	104023
C10H8O6S	4-Methylumbelliferone sulfate; 4-Methylumbelliferyl sulfate;	NULL		2445.58	1801.28	1617.99	2367.91	2503.09	1053.75	2718.48	2638.02	1915.61
C15H11N3O3	Nitrazepam;	NULL		8419.25	10144.5	12769.3	2739.37	9291.34	18113.1	3186.27	1862.21	5296.28
C11H13N3O6	Cucumopine;	NULL		50762.6	32783.4	42622.9	35098	42348.7	28271.3	29628.3	29930	51632.4
C10H18N4O6	N-(L-Arginino)succinate; 2-(Nomega-L-Arginino)succinate; L-Argininosuccinate; L-Argininosuccinic acid; L-Arginosuccinic acid;	map00220 Arginine biosynthesis; map00250 Alanine, aspartate and glutamate metabolism; map01100 Metabolic pathways; map01110 Biosynthesis of secondary metabolites; map01130 Biosynthesis of antibiotics; map01230 Biosynthesis of amino acids		380907	382400	380495	358014	356449	253127	666964	1.14692e+06	542481
C13H12O8	Phaseolic acid;	NULL		66071.3	70787.5	56758.7	54400.8	60726	57657.9	58574.2	62752.4	57745
C11H15N5O3S	5'-Methylthioadenosine; Methylthioadenosine; S-Methyl-5'-thioadenosine; 5-Methylthioadenosine; 5'-Deoxy-5'-(methylthio)adenosine; Thiomethyladenosine; MTA;	map00270 Cysteine and methionine metabolism; map00908 Zeatin biosynthesis; map01060 Biosynthesis of plant secondary metabolites; map01100 Metabolic pathways		69057.7	61207.8	80436.2	53198.7	79925.9	124851	60768.3	77181.6	96740.2
C8H16NO9P	N-Acetyl-D-galactosamine 6-phosphate;	map00052 Galactose metabolism; map02060 Phosphotransferase system (PTS)		221958	67976.1	66193.6	304696	303190	330824	341530	162871	193875
C16H12ClNO	2-(p-Methoxyphenyl)-3-(m-chlorophenyl)acrylonitrile;	NULL		5210.47	10646.4	33087.9	2147.83	1939.76	3623.79	3105.05	2636.69	2325.67
C6H14O10P2	alpha-D-Ribose 1-methylphosphonate 5-phosphate;	map00440 Phosphonate and phosphinate metabolism		137658	60463.7	80424.2	118312	137266	51073.5	176719	108830	131624
C13H10Cl2S	Chlorobenside; 4-Chlorobenzyl 4-chlorophenyl sulfide;	NULL		4163.32	11112.6	6090.28	2014.79	3782.24	5324.11	3076.65	17046.7	56000.4
C16H10O6	Aflatoxin P1; AFP1;	NULL		8494.18	5453.59	4647.28	8775.99	9822.78	4005.23	9203	9609.58	7334.7
C9H17O12P	2-O-(6-Phospho-alpha-mannosyl)-D-glycerate; 2-O-(6-Phospho-alpha-D-mannosyl)-D-glycerate;	map02060 Phosphotransferase system (PTS)		2932.3	20804	17693.6	2876.07	4476.48	12658.6	2723.45	11877.5	10330.8
C10H18N4O4S3	Thiodicarb;	NULL		67575.3	28234.1	44289.3	53535.3	72477.9	29501.4	84284.3	48422.7	57051.2
C15H16O9	Cichoriin;	NULL		241423	117314	74813.8	281322	132265	99279.3	282229	281554	150675
C10H12N5O5P	3',5'-Cyclic dAMP;	NULL		189500	90234.7	147694	197637	302611	90813.5	301370	196998	183204
C9H14N2O11P2	dUDP; 2'-Deoxyuridine 5'-diphosphate;	map00240 Pyrimidine metabolism; map01100 Metabolic pathways		43799.9	49082.4	61615	48696.2	71883.3	46100.9	71282.7	43581.2	49706.4
C12H22O12	Cellobionate; Cellobionic acid; 4-O-beta-D-Glucopyranosyl-D-gluconate;	NULL		7743.5	19946.9	34056.7	7433.08	7227.89	21535.5	7682.5	8931.08	12046.7
C12H14AlMgNO11	Bufferin; Aspirin softam;	NULL		78395.6	45502.7	42936.1	98422.2	115178	69746	139132	64285.3	82172.5
C15H22N6O5S	S-Adenosyl-L-methionine; S-Adenosylmethionine; AdoMet; SAM;	map00261 Monobactam biosynthesis; map00270 Cysteine and methionine metabolism; map00330 Arginine and proline metabolism; map00908 Zeatin biosynthesis; map01060 Biosynthesis of plant secondary metabolites; map01070 Biosynthesis of plant hormones; map01100 Metabolic pathways; map01110 Biosynthesis of secondary metabolites; map01130 Biosynthesis of antibiotics; map01230 Biosynthesis of amino acids; …		427945	280384	453853	221796	509271	1.04362e+06	337079	433798	617190
C10H13N4O10P	Urate D-ribonucleotide;	NULL		22034	50843.2	42438.6	20461.1	23448.3	20989.6	28972.7	64191.4	97934.8
C13H16N10O5S	Azimsulfuron;	NULL		103345	53484.6	63913.8	97067.1	98874.6	69845.1	120111	63406.7	70084
C20H20O14	1-O,6-O-Digalloyl-beta-D-glucose;	NULL		37113.7	28101.3	27360.9	31774.6	36241.2	27245.7	39648.3	29511.2	24457.5
C20H12N2Na2O7S2	Carmoisine; Azorubin; C.I. Acid Red 14;	NULL		12229.1	25404.3	19395.9	8737.55	16378.4	18366.2	13100.7	17030.4	22264.1
C31H23BrO2S	Difethialone;	NULL		114201	176076	185174	117031	234966	174287	159477	85361.3	160528
C10H17N3O6S.[C8H12N2O4S]n	[Glu(-Cys)]n+1-Gly;	NULL		18052.4	20934.7	22876.9	14948	35779.3	22478.2	24096.1	10486.6	12961.4
C28H30ClNO10	Novclobiocin 105;	map00401 Novobiocin biosynthesis; map01130 Biosynthesis of antibiotics		19962.9	12371.8	11515.1	19648.1	21337.8	30035.6	17921.7	28772.2	26575.3
C4H8O5	Threonate; L-Threonate; (2R,3S)-2,3,4-Trihydroxybutanoic acid;	map00053 Ascorbate and aldarate metabolism		288591	325929	258592	294352	234700	378712	341849	305540	290987
C4H6N4O3	(R)(-)-Allantoin; (R)-Allantoin;	map00230 Purine metabolism; map01120 Microbial metabolism in diverse environments		126862	106388	53085.7	96731.7	73049.4	71826.8	111455	114751	78590.3
C7H13NO5	2-Amino-3,7-dideoxy-D-threo-hept-6-ulosonic acid;	map00400 Phenylalanine, tyrosine and tryptophan biosynthesis; map01110 Biosynthesis of secondary metabolites; map01130 Biosynthesis of antibiotics		56571	58739.8	69795.2	60609.5	62669.7	68264.1	53955	50608.4	53805.7
C6H12O7	D-Gluconic acid; D-Gluconate; D-gluco-Hexonic acid;	map00030 Pentose phosphate pathway; map01100 Metabolic pathways; map01110 Biosynthesis of secondary metabolites; map01120 Microbial metabolism in diverse environments; map01130 Biosynthesis of antibiotics; map01200 Carbon metabolism		5.24131e+06	2.00073e+07	3.84779e+07	5.04595e+06	1.16259e+07	3.10361e+07	4.82352e+06	1.10179e+07	1.25239e+07
C6H10NO5P	[5-(Aminomethyl)furan-3-yl]methyl phosphate; 5-(Aminomethyl)-3-furanmethanol phosphate;	map00680 Methane metabolism		2317.38	4630.9	7441.89	1359.01	3067.72	7492.62	1582.02	1820.4	3168.95
C10H17N3O2	Isouron;	NULL		6129.35	5990.05	7555.63	5838.06	6939.4	7802.26	5700.05	4886.39	4770.04
C7H10O6	2-Keto-5-epi-valiolone;	map00525 Acarbose and validamycin biosynthesis; map01130 Biosynthesis of antibiotics		34521.2	50589	29530.2	34393.1	24940.1	28648.9	29487.6	29697.8	38963.1
C8H11NO6	2-(Hydroxymethyl)-3-(acetamidomethylene)succinate; 2-(Acetamidomethylene)-3-(hydroxymethyl)succinate;	map00750 Vitamin B6 metabolism		67661.3	53340.9	66380.1	69042.7	59330.8	50397.9	71382.4	66668.1	64572.3
C8H14O8	Ketodeoxyoctonic acid; Ketodeoxyoctulonic acid; 3-Deoxy-D-manno-oct-2-ulopyranosonic acid;	NULL		457418	433793	418856	382253	401982	461355	390400	332616	373453
C7H16NO7P	Validamine 7-phosphate;	map00525 Acarbose and validamycin biosynthesis; map01130 Biosynthesis of antibiotics		18412.1	29861.6	69522.2	23483.1	23392	36191.3	23194.8	24077.4	29005
C11H21N3O5	epsilon-(gamma-L-Glutamyl)-L-lysine;	NULL		174705	161855	205219	160079	177313	194040	148550	125414	139979
C6H11O8P	6-Deoxy-5-ketofructose 1-phosphate; 1-Deoxy-D-threo-hexo-2,5-diulose 6-phosphate;	map00400 Phenylalanine, tyrosine and tryptophan biosynthesis; map01110 Biosynthesis of secondary metabolites; map01130 Biosynthesis of antibiotics		9970.59	13285	12884.8	10184.4	9051.71	14592.3	10830.1	8406	26132.4
C8H15N2O9P	5'-Phosphoribosyl-N-formylglycinamide; N-Formyl-GAR; N-Formylglycinamide ribonucleotide; N2-Formyl-N1-(5-phospho-D-ribosyl)glycinamide;	map00230 Purine metabolism; map01100 Metabolic pathways; map01110 Biosynthesis of secondary metabolites; map01130 Biosynthesis of antibiotics		49901.4	9803.95	2712.08	83396.3	18617.6	6299.03	82691.8	11298.1	12346.1
C11H20O10	Vicianose; O-alpha-L-Arabinopyranosyl-(1-6)-D-glucopyranose;	NULL		291489	411223	549872	323796	439438	436593	391916	330761	465258
C15H10ClF3N2O3	Triflumuron; Trifluron;	NULL		30244.7	30180.6	86656.4	26500.5	24055	41237.8	50253.4	22158.4	29928.8
C10H14N4O10P2	dIDP; 2'-Deoxyinosine-5'-diphosphate; 2'-Deoxyinosine 5'-diphosphate;	map00230 Purine metabolism		9248.39	1438.56	888.848	8998.84	2950.88	1076.7	21590.8	763.907	1735.4
C12H23O14P	Lactose 6'-phosphate;	map00052 Galactose metabolism; map01100 Metabolic pathways; map02060 Phosphotransferase system (PTS)		812884	1.18052e+06	705302	860399	955891	914754	955077	833894	1.18387e+06
C27H31NO5	Ignavine;	NULL		56629.4	49708.6	53181.7	59691.3	67073.7	54623	60183.3	53447.9	45355.5
C3H9O6P.[C9H17O10P]n	alpha-D-Glucosylpoly(glycerol phosphate);	NULL		268025	182010	110362	295170	169777	131067	267739	272789	213106
C26H27NO10	Carminomycin;	map01057 Biosynthesis of type II polyketide products; map01130 Biosynthesis of antibiotics		292830	154907	106912	305085	301844	274842	289470	349721	262284
C30H27O14+	Delphinidin 3-(6-p-coumaroyl)glucoside;	map00942 Anthocyanin biosynthesis		163006	70506.4	101401	175255	279984	166726	223118	208070	199739
C20H31N3O19P2	UDP-N-acetylmuramate; UDP-N-acetyl-alpha-D-muramate; UDP-N-acetylmuramic acid; UDP-MurNAc;	map00471 D-Glutamine and D-glutamate metabolism; map00520 Amino sugar and nucleotide sugar metabolism; map00550 Peptidoglycan biosynthesis; map01100 Metabolic pathways		20423.4	14780.2	13493.2	42678.8	21898.9	17787.1	23702.6	22731.7	29259
C2H3NO2	Iminoglycine; Iminoacetic acid; 2-Iminoacetate;	map00730 Thiamine metabolism; map01100 Metabolic pathways		6081.86	5811.95	6241.5	6100.86	6926.69	5052.81	6050.73	6188.53	6330.15
C20H26N10O12P2S2	Adenylated molybdopterin; Adenylyl-molybdopterin;	map00790 Folate biosynthesis; map01100 Metabolic pathways		18048.1	27993.9	21363	25172.5	14582.7	17129	15730.6	21104.5	25634.8
C32H38N4O12S3	Sultamicillin tosilate; Sultamicillin tosylate;	NULL		63543.8	26834.8	11879.7	79368.7	32323.3	13791.3	59279.9	67931	56567.6
CH4O3S	Methanesulfonic acid; Methanesulfonate;	map00920 Sulfur metabolism		2320.36	1412.55	1624.97	1945.97	1708.74	2122.25	1920.57	1598.93	1496.93
C4H9NO2	(S)-2-Aminobutanoate; (S)-2-Aminobutanoic acid; (S)-2-Aminobutyric acid;	map00270 Cysteine and methionine metabolism; map01100 Metabolic pathways		19484	15426.6	13961.2	21965.8	19769.9	22989.3	22762.6	18647.6	21197.8
C5H10N2O3	Isoglutamine; 4,5-Diamino-5-oxopentanoic acid; DL-Isoglutamine;	map00340 Histidine metabolism		65690.8	65464.5	71240.4	54459	56052.1	59949.3	62267.2	57733.9	53671.1
C9H11NO2	Benzocaine; Ethyl aminobenzoate;	NULL		30764.6	56807.8	19672.2	42722.3	51172.8	34322.2	34226	36683.9	45508.8
C12H10O2	Eutypine; 4-Hydroxy-3-(3-methyl-3-butene-1-ynyl)benzaldehyde;	NULL		248477	209998	231667	231058	210563	255525	225662	209840	267840
C11H14N2O4	Felbamate;	map00982 Drug metabolism - cytochrome P450		49701.2	49852.3	57046.7	53784.6	56994.4	59935.6	50175.5	41555.6	45761.8
C8H16N4O6	Bluensidine;	map01130 Biosynthesis of antibiotics		102592	84868.4	91175	99923	97991.1	124471	96044.1	98930.7	94243.2
C16H18O3	Dihydroechinofuran;	map00130 Ubiquinone and other terpenoid-quinone biosynthesis		12817.6	13182.1	12410.9	11610.7	21492	17045.1	10969	9618.36	10252.7
C12H22O11	Levanbiose;	map00500 Starch and sucrose metabolism		1.43326e+07	1.78322e+07	9.81235e+06	1.35346e+07	1.00149e+07	1.42318e+07	1.20437e+07	1.43737e+07	1.24534e+07
C21H33NO4	Cardiopetalidine;	NULL		54492.7	103094	25225.2	43588	14021.5	74921.4	29158.6	68979.5	42732.2
C25H30FN3O9	Grepafloxacin glucuronide; Grepafloxacin 3-glucuronide;	NULL		11107.9	8000.57	11597.1	14262.2	16797.9	14633.2	14442	10460.6	9839.37
C31H34O10	100-1;	map01057 Biosynthesis of type II polyketide products; map01130 Biosynthesis of antibiotics		70745.3	86245.3	109265	133178	147443	145894	93132.8	132097	75374.3
C24H42O21	Stachyose;	map00052 Galactose metabolism		1.54519e+06	3.24074e+06	3.86187e+06	1.46524e+06	1.46272e+06	3.7465e+06	1.20158e+06	1.49791e+06	1.68823e+06
C9H11NO2	5-(3-Pyridyl)-2-hydroxytetrahydrofuran;	map00980 Metabolism of xenobiotics by cytochrome P450; map05204 Chemical carcinogenesis		41512.1	7334.32	8470.19	58082.4	64310.6	26643.1	39917.6	44551.2	47611.2
C15H14ClN	4-Chloro-[2-(4-Pyridinyl)-1-butenyl]phenol; 4-[1-[(4-Chlorophenyl)methylene]propyl]pyridine;	NULL		67039.8	95945	95105	82060.8	53295.1	71301.1	81806	70000.8	50602.8
C17H21NO4	Carinatine;	NULL		240524	114171	135817	275924	231124	132680	287166	274286	206427
C10H18O9	alpha-1,5-L-Arabinobiose;	map02010 ABC transporters		130566	167545	159459	152157	130078	176522	129606	151003	147754
C17H10F6N4S	Flubenzimine;	NULL		118405	89763	60445.5	141753	95803.2	63997.5	129138	117634	117079
C21H11ClF6N2O3	Flufenoxuron;	NULL		66667.6	57169.2	36569.7	69816.9	68143.5	46225.3	76277.1	68097.1	71633.5
C21H22O11	Neocarthamin;	NULL		163376	143091	106612	175152	156983	142923	164228	153775	138264
C27H24N4O6	GW1843; 1843U89;	map01523 Antifolate resistance		198195	258217	177587	248480	371587	241381	204028	650810	1.47503e+06
C23H21F7N4O3	Aprepitant;	NULL		814144	718768	580663	685964	538911	433043	704942	775072	640006
C35H39N5O5	Ergocristine;	NULL		28166.1	3626.81	1797.21	29417.5	15003.6	2825.04	29718.5	30421.4	15807.2
C23H42N4O15	6'''-Deamino-6'''-oxoparomomycin II;	map00524 Neomycin, kanamycin and gentamicin biosynthesis; map01130 Biosynthesis of antibiotics		84865.3	147563	303074	101029	218091	207213	69896.4	96137	113595
C29H35O17+	Malvin;	NULL		82860.5	41700.7	25375.8	97600.7	51652.4	31105.8	85376.9	84243.9	51942.3
C37H44O13	Urdamycin B;	map01057 Biosynthesis of type II polyketide products; map01130 Biosynthesis of antibiotics		113632	133926	211709	144304	170254	158611	125628	142399	135557
C37H34N2Na2O9S3	Brilliant blue; Brilliant blue FCF, disodium salt; Food blue No.1;	NULL		58757.8	312908	287842	56933.8	98128.9	297904	58052	95385	95276.5
C5H11NO2	L-Valine; 2-Amino-3-methylbutyric acid;	map00280 Valine, leucine and isoleucine degradation; map00290 Valine, leucine and isoleucine biosynthesis; map00311 Penicillin and cephalosporin biosynthesis; map00460 Cyanoamino acid metabolism; map00770 Pantothenate and CoA biosynthesis; map00966 Glucosinolate biosynthesis; map00970 Aminoacyl-tRNA biosynthesis; map01060 Biosynthesis of plant secondary metabolites; map01063 Biosynthesis of alkal…		2393.18	2678.65	2826.32	2633.71	2406.93	2680.14	2043.26	2255.71	2791.23
C3H6O4	D-Glycerate; Glycerate; (R)-Glycerate; Glyceric acid;	map00030 Pentose phosphate pathway; map00260 Glycine, serine and threonine metabolism; map00561 Glycerolipid metabolism; map00630 Glyoxylate and dicarboxylate metabolism; map00680 Methane metabolism; map01100 Metabolic pathways; map01110 Biosynthesis of secondary metabolites; map01120 Microbial metabolism in diverse environments; map01130 Biosynthesis of antibiotics; map01200 Carbon metabolism		88052.3	90351.9	53690.3	68153.1	52891.1	55079.6	70469.4	69727.2	77698.9
C40H65N9O27P2	UDPMurNAc(oyl-L-Ala-gamma-D-Glu-L-Lys-D-Ala-D-Ser); UDP-N-acetylmuramoyl-L-alanyl-gamma-D-glutamyl-L-lysyl-D-alanyl-D-serine; UDP-N-acetylmuramoyl-L-alanyl-D-glutamyl-L-lysyl-D-alanyl-D-serine;	map01502 Vancomycin resistance		51551.2	136024	114818	62211.3	123172	117791	54131.8	80268.6	108232
C4H7NO3	(Z)-2-Methylperoxyaminoacrylate;	NULL		5827.07	7154.85	7097.6	5994.37	5581.01	8378.72	5775.09	6196.47	5234.16
C5H10O5	D-Ribulose; D-erythro-2-Pentulose; D-Arabinoketose; D-Arabinulose; D-Riboketose;	map00040 Pentose and glucuronate interconversions; map01100 Metabolic pathways		56581.3	64844	94312.6	56726.7	52967.8	69341.8	58573.5	56221.5	61934.4
C6H11N3O4	N-Amidino-L-glutamate;	NULL		10861.4	11006.2	10654.1	11800.5	12770.8	11716.3	12300.2	10991.2	12843.2
C6H12O6	D-Glucose; Grape sugar; Dextrose; Glucose; D-Glucopyranose;	map00010 Glycolysis / Gluconeogenesis; map00030 Pentose phosphate pathway; map00052 Galactose metabolism; map00500 Starch and sucrose metabolism; map00520 Amino sugar and nucleotide sugar metabolism; map00521 Streptomycin biosynthesis; map00524 Neomycin, kanamycin and gentamicin biosynthesis; map00901 Indole alkaloid biosynthesis; map01100 Metabolic pathways; map01110 Biosynthesis of secondary me…		1.17919e+06	1.13658e+06	1.39537e+06	990405	1.18904e+06	1.43024e+06	997905	1.00672e+06	1.00976e+06
C7H14O7	Sedoheptulose; D-altro-Heptulose; D-Sedoheptulose; Volemulose;	map00710 Carbon fixation in photosynthetic organisms		345699	259840	258549	335520	321366	335713	358393	324896	260323
C6H10O6	D-galacto-Hexodialdose;	NULL		2230.18	14293.4	91851.5	5849.15	31948.2	92153.9	3528.33	4813.3	10297
C7H13NO5	2-Amino-5-epi-valiolone;	map00525 Acarbose and validamycin biosynthesis; map01130 Biosynthesis of antibiotics		78120.8	83973.9	66019.7	80455.4	59902	103299	71621.2	75466.8	69050.6
C6H15O5PS2	Demeton-S-methylsulphon;	NULL		195972	242603	203201	168479	142910	305216	154864	156429	130903
C10H12N4O4	Deoxyinosine;	map00230 Purine metabolism; map01100 Metabolic pathways		52363.4	26134.5	25147	63712.5	48739.4	36314.9	62458.9	95754.1	99532
C10H18N2O8	N-Glycosyl-L-asparagine;	NULL		77843	78326.6	95955.4	83051	94278.8	78054.9	76799	81143.1	80408.2
C11H19NO9	O-Acetylneuraminic acid; O-Acetylated sialic acid;	NULL		44937.7	40800.5	60812.6	49914.8	49480.4	52498.5	48572.3	41672.6	46684.7
C11H16N4O4	Deoxycoformycin; Pentostatin;	NULL		52157.7	40243.5	78761.7	63158	65416.6	55729.6	70948.5	51824.2	45044.1
C12H17NO8	Gynocardin; 2-Cyclopentene-1-carbonitrile, 1-(beta-D-glucopyranosyloxy)-4,5-dihydroxy-,(1alpha,4alpha,5beta)-;	NULL		45619	48111.2	60695.9	54686.5	49650.9	53130.4	50147.1	47985.2	46735
C19H26N2O	Astrophylline;	NULL		5898.26	4723.58	12167.7	6720.03	7137.67	7949.93	5814.19	6774.12	5677.44
C17H25NO5	Alloxydim;	NULL		21642	18336.2	23821.9	25145.7	23005	24434.1	26046.3	22209.3	23032.6
C22H29NO2	L-alpha-Acetyl-N-normethadol; nor-LAAM;	map00982 Drug metabolism - cytochrome P450		86699.1	95439.7	81014.9	80109.9	72253.6	102428	71108.5	81663.5	69498.2
C16H18O9	Scopolin;	map00940 Phenylpropanoid biosynthesis; map01061 Biosynthesis of phenylpropanoids; map01110 Biosynthesis of secondary metabolites		16114.1	17886.9	28486.4	18151.4	17608.3	22606.5	17358.3	16795.4	15785.8
C14H25NO11	Lacto-N-biose; beta-D-Gal-(1->3)-D-GlcNAc; beta-D-Galactopyranosyl-(1->3)-N-acetyl-D-glucosamine;	NULL		7236.01	4438.14	7852.08	8789.04	9234.93	9186.96	7722.21	4006.41	8858.9
C21H14FN3O2	Quinoline-3-carboxamides;	NULL		715920	238034	188844	438416	445525	159991	621908	229910	501901
C20H23N3O7	2-N,6-N-Bis(2,3-dihydroxybenzoyl)-L-lysine amide;	NULL		33906.7	29696.4	49653.2	43620.1	44999.6	35087.2	39192.1	35495.9	36466
C17H19ClF2N3O3	Lomefloxacin hydrochloride;	NULL		314041	322916	128488	249939	238108	215250	260385	276237	252132
C15H26O14	2-O-[alpha-D-Glucopyranosyl-(1->6)-alpha-D-glucopyranosyl]-D-glycerate;	NULL		444930	339755	182152	541436	455853	275328	515285	530235	359919
C25H28O12	Chryso-obtusin glucoside;	NULL		346457	354158	304003	371926	574943	708131	346501	325959	363045
C27H29NO11	10-Carboxy-13-deoxycarminomycin; D 788-1;	map01057 Biosynthesis of type II polyketide products; map01130 Biosynthesis of antibiotics		158610	71328.4	29050.4	124252	98143.4	67577.3	138578	124765	123984
C18H32O15	beta-D-Glc-(1->4)-alpha-L-Rha-(1->3)-D-Glc; beta-D-Glcp-(1->4)-alpha-L-Rhap-(1->3)-D-Glcp;	NULL		365299	182580	100014	330773	346005	233000	367011	255088	214679
C33H44O8	5-Oxoavermectin ''1b'' aglycone;	map00522 Biosynthesis of 12-, 14- and 16-membered macrolides; map01130 Biosynthesis of antibiotics		9052.51	27109	31365.9	6348.51	38788.1	30443.8	8589.94	15111.8	28540.6
C26H28O13	Puerarin xyloside;	NULL		670699	494779	464302	545970	527795	466397	551031	529376	615284
C21H39N5O14	Bluensomycin;	map01130 Biosynthesis of antibiotics		30000.2	28997.9	62893.2	38374.4	39599.8	55710.2	37716.5	42575.4	53564.2
C28H34O15	Neohesperidin; Hesperetin 7-O-neohesperidoside;	map00941 Flavonoid biosynthesis		597879	746589	587743	621711	557886	672133	585175	607047	604090
C31H39NO10S	Labriformin;	NULL		107984	41316.8	43322.9	102000	101079	40176.8	116189	119025	81859
C30H29N3O7S	7,8-Dihydro-7-hydroxy-8-S-glutathionyl-benzo[a]pyrene;	map00980 Metabolism of xenobiotics by cytochrome P450; map05204 Chemical carcinogenesis		146131	121485	86367.3	184909	125747	86117	170127	124969	112085
C35H34MgN4O5	Bacteriochlorophyllide g;	NULL		4.24151e+06	6.28572e+06	7.57088e+06	5.27031e+06	7.39819e+06	6.64625e+06	4.8799e+06	6.0419e+06	4.69751e+06
C25H45FeN6O8	Ferroxamine; Ferrioxamine; Desferal-iron(III);	NULL		176719	249889	365391	351300	487300	234145	168557	115901	100605
C24H42O21	Cellotetraose;	NULL		1.32909e+06	8.31386e+06	1.08458e+07	1.25167e+06	4.79954e+06	8.61441e+06	1.05742e+06	2.36294e+06	3.01941e+06
C27H42FeN9O12	Ferrichrome;	map02010 ABC transporters		16377.6	10940.3	10428.8	22343.2	19741	13626.9	20819.6	17439.6	17070.1
C36H37O18+	Pelargonidin 3-O-(6-caffeoyl-beta-D-glucoside) 5-O-beta-D-glucoside; Bisdemalonylsalvianin;	map00942 Anthocyanin biosynthesis		547546	590359	622569	529543	650205	699701	516950	696288	691795
C40H47NO12	3'-N-Debenzoyl-2'-deoxytaxol; beta-Phenylalanoyl baccatin III; 13-O-beta-Phenylalanoylbaccatin III;	map00904 Diterpenoid biosynthesis; map01110 Biosynthesis of secondary metabolites		12123.8	22549.1	37605.5	15968.9	22507.7	31717.2	13281.9	18152.4	9074.52
C28H48N9O16P	2''-Adenylylgentamicin A;	NULL		85303.2	126075	202187	79372	180900	157339	79107.2	137666	114672
C30H52O26	Verbascose; beta-D-Fructofuranosyl O-alpha-D-galactopyranosyl-(1-6)-O-alpha-D-galactopyranosyl-(1-6)-O-alpha-D-galactopyranosyl-(1-6)-alpha-D-glucopyranoside;	NULL		363214	583313	440073	378416	276550	528018	280545	313724	409145
C39H49NO21	Anthemis glycoside A;	NULL		35703.4	96679	63976.2	31645.6	55632.5	89174.4	29103.1	58078.5	43355.5
C5H9NO2	L-Proline; 2-Pyrrolidinecarboxylic acid;	map00330 Arginine and proline metabolism; map00332 Carbapenem biosynthesis; map00333 Prodigiosin biosynthesis; map00401 Novobiocin biosynthesis; map00404 Staurosporine biosynthesis; map00970 Aminoacyl-tRNA biosynthesis; map01100 Metabolic pathways; map01110 Biosynthesis of secondary metabolites; map01130 Biosynthesis of antibiotics; map01230 Biosynthesis of amino acids; map02010 ABC transporters;…		7537.83	5593.62	7655.27	8617.68	10165.2	9492.53	8185.65	8579.39	9681.11
C36H62O31	alpha-Galactosyl-(1-6)-alpha-galactosyl-(1-6)-alpha-galactosyl-(1-6)-alpha-galactosyl-(1-6)-alpha-glucosyl-(1-2)-beta-fructose; Ajugose;	NULL		98030.5	162311	134409	103590	60052.3	128096	61801.9	72619	115795
C6H9NO	N-Vinyl-2-pyrrolidone; 1-Ethenyl-2-pyrrolidinone;	NULL		148059	133791	172788	147933	146246	148605	147848	147971	158662
C6H8N2O2	Dihydrourocanate; Deaminohistidine; 3-(1H-Imidazol-4-yl)propanoate;	map00340 Histidine metabolism		472045	393099	495689	440903	453715	480105	452422	513957	504216
C6H7NO3	6-Oxo-1,4,5,6-tetrahydronicotinate; 1,4,5,6-Tetrahydro-6-oxonicotinate; 1,4,5,6-Tetrahydro-6-oxonicotinic acid;	map00760 Nicotinate and nicotinamide metabolism; map01120 Microbial metabolism in diverse environments		49097.7	49340.7	55029.5	48278.9	45081.7	48586.3	45309.1	47084.4	48188.3
C6H8N2O	1-(1-Oxopropyl)-1H-imidazole; N-Propanoylimidazole; N-Propionylimidazole;	NULL		31917.9	39719.4	47171.7	45894.9	44335.4	48885.4	43418.4	47670.6	45618.8
C6H6O3	Triacetate lactone; 4-Hydroxy-6-methyl-2-pyrone;	NULL		636187	516075	515963	545428	507949	634068	533608	459513	662799
C7H9NO3	(1R,6S)-6-Amino-5-oxocyclohex-2-ene-1-carboxylate;	map00405 Phenazine biosynthesis; map01130 Biosynthesis of antibiotics		1.60343e+07	1.45125e+07	1.62337e+07	1.40468e+07	1.28009e+07	1.60227e+07	1.38182e+07	1.46988e+07	1.54557e+07
C7H10ClN3	Crimidine;	NULL		20611	18768.2	22396.3	20231	20062.1	21039.1	20150.2	20606.8	19687.2
C6H12N2O3	N(alpha)-Acetyl-L-2,4-diaminobutyrate; N-alpha-Acetyl-L-2,4-diaminobutyrate; N2-Acetyl-L-2,4-diaminobutanoate; (2S)-2-Acetamido-4-aminobutanoate;	map00260 Glycine, serine and threonine metabolism; map01100 Metabolic pathways		130971	115067	108082	123174	123176	129226	130700	115900	121588
C7H7FO4	3-Fluorocyclohexadiene-cis,cis-1,2-diol-1-carboxylate;	map00364 Fluorobenzoate degradation; map01120 Microbial metabolism in diverse environments		15621.2	16843.6	16221.7	13180.4	12892.9	17169.6	13489.7	14710.8	13845.9
C6H18N3OP	Hexamethylphosphoramide; HMPA;	NULL		78420.5	77706.7	110768	74204.1	61308.1	79069.9	73738.9	80119.2	82242.2
C10H10O4	Methyl caffeate;	NULL		60772.1	53048.3	68533.7	54537.6	52764.3	62932.5	58007.1	52003	59180.6
C7H9N5O2	6-(Hydroxymethyl)-7,8-dihydropterin; 6-Hydroxymethyl-7,8-dihydropterin; 2-Amino-4-hydroxy-6-hydroxymethyl-7,8-dihydropteridine;	map00790 Folate biosynthesis; map01100 Metabolic pathways		46522.6	38360	66489.7	39717.1	45106.5	74432.7	39079.7	43014.4	52818.2
C8H15N3O2	Isocarbamid;	NULL		298765	253982	315087	299276	316120	351295	280417	314172	322006
C8H16N2O4	N6-Acetyl-N6-hydroxy-L-lysine; N6-Acetyl-N6-hydroxylysine;	map00310 Lysine degradation; map01120 Microbial metabolism in diverse environments		232473	232144	240844	259385	267502	269263	249275	220702	233182
C12H14O3	3-Dimethylallyl-4-hydroxybenzoate;	map00401 Novobiocin biosynthesis; map01130 Biosynthesis of antibiotics		181563	167393	185901	153552	153549	165144	158857	151435	160884
C8H15NO5	N-Acetyl-D-quinovosamine; 2-Acetamido-2,6-dideoxy-D-glucose;	NULL		79604.9	83390	91635.3	89076.8	80277.8	92420	83266.2	74671.9	73121.1
C15H18O3	7alpha-Hydroxydehydrocostus lactone;	NULL		14515.2	13609.9	14346.5	15326.4	20563.3	14806.8	14856.2	14574.3	13595.4
C11H14O5	Genipin;	NULL		62619.4	58421.6	64762.6	54061.9	49378.8	54200.6	50761.2	59621.9	64648.6
C11H14N2O5	2-Hydroxyfelbamate;	map00982 Drug metabolism - cytochrome P450		213385	165723	227827	196322	210253	218364	200375	251044	232952
C11H11ClN2O2	7-Chloro-L-tryptophan;	map00404 Staurosporine biosynthesis; map01130 Biosynthesis of antibiotics		72429	64732.9	74654.4	69509.4	68523.5	71181.9	68835.5	72800	70172
C10H14N2O6	Spongothymidine;	NULL		2.0028e+06	1.38718e+06	2.07363e+06	2.02081e+06	2.33409e+06	1.46537e+06	2.31965e+06	2.30494e+06	1.85917e+06
C13H12N4O	2-Hydroxyamino-1-methyl-6-phenylimidazo[4,5-b]pyridine; 2-Hydroxyamino-PhIP;	map05204 Chemical carcinogenesis		120817	88698.4	105688	116272	95383.5	88444	106939	102755	117355
C11H14N4O4	8-Oxodeoxycoformycin;	NULL		231059	187465	152686	195561	161122	157623	185988	160246	251163
C17H11NO5	N-(6-Oxo-6H-dibenzo[b,d]pyran-3-yl)maleamic acid;	NULL		13086.5	13113.1	12508.1	16007.7	15508.2	20879.7	14197.2	14528	12788.9
C9H14N3O8P	CMP; Cytidine-5'-monophosphate; Cytidylic acid;	map00240 Pyrimidine metabolism; map01100 Metabolic pathways		17415.2	29246.3	28263.4	23260	32989.2	38372.4	23858.9	18101.5	22417.5
C12H20O10	Bis-D-fructose 2',1:2,1'-dianhydride; Difructose anhydride I;	NULL		1.01417e+06	745834	441244	805746	618884	610853	754039	554498	1.10035e+06
C11H15N2O8P	Nicotinamide D-ribonucleotide; NMN; Nicotinamide mononucleotide; Nicotinamide ribonucleotide; Nicotinamide nucleotide; beta-Nicotinamide D-ribonucleotide; beta-Nicotinamide ribonucleotide; beta-Nicotinamide mononucleotide;	map00760 Nicotinate and nicotinamide metabolism; map01100 Metabolic pathways		382305	376241	358562	391402	342546	341208	405874	290648	345185
C18H28N2O3	Iprovalicarb;	NULL		13838	17889.4	23233	21035.4	21069.2	18715.9	18757.6	15962.7	20630.1
C10H14N5O7P	AMP; Adenosine 5'-monophosphate; Adenylic acid; Adenylate; 5'-AMP; 5'-Adenylic acid; 5'-Adenosine monophosphate; Adenosine 5'-phosphate;	map00230 Purine metabolism; map00908 Zeatin biosynthesis; map01060 Biosynthesis of plant secondary metabolites; map01065 Biosynthesis of alkaloids derived from histidine and purine; map01070 Biosynthesis of plant hormones; map01100 Metabolic pathways; map01110 Biosynthesis of secondary metabolites; map01130 Biosynthesis of antibiotics; map01523 Antifolate resistance; map04022 cGMP-PKG signaling p…		44673.9	204245	132684	49722.2	123097	123832	62539.6	23316.8	58746.9
C17H29NO3S	Sethoxydim;	NULL		3623.82	1704.9	4812.12	4623.98	3610.09	4295.53	4112.31	2884.69	5916.91
C18H16O8	Irigenin;	NULL		26542	29967	29753.5	27589.3	21986.6	23077.2	26954.7	27463.9	21292.4
C23H27ClN	Butenafine hydrochloride;	NULL		43841.8	38453.5	48142.4	46697.6	39542.9	34750.1	48701	46716.7	39423.3
C9H14N2O12P2	UDP; Uridine 5'-diphosphate;	map00240 Pyrimidine metabolism; map00908 Zeatin biosynthesis; map01100 Metabolic pathways; map04080 Neuroactive ligand-receptor interaction		13495	90970.9	143290	9647.77	44467.8	88072.2	10177.3	2107.35	8293.91
C13H22N4O8S2	S-Glutathionyl-L-cysteine;	map00270 Cysteine and methionine metabolism		244336	122667	103826	76263.7	79857.7	106217	91732.3	80940.2	74787.1
C21H20N2O7	4-Methylamino-4-de(dimethylamino)anhydrotetracycline;	NULL		46185.9	24014.6	12565.6	50731.4	34062.4	22343.3	40755.3	32351.3	47712.4
C24H27NO8	Medermycin;	map01057 Biosynthesis of type II polyketide products; map01130 Biosynthesis of antibiotics		323723	210143	100294	297930	355555	176473	316581	320069	465735
C22H29NO12	5-O-(Indol-3-ylacetyl-myo-inositol) D-galactoside;	NULL		14347.3	20574.3	17587.7	16577	10836.9	10220.9	18792.8	16374.2	8483.06
C17H27N4O14P	CMP-8-amino-3,8-dideoxy-beta-D-manno-octulosonate; CMP-Kdo8N;	NULL		5.88369e+06	7.53779e+06	5.68877e+06	5.40477e+06	4.4829e+06	7.4023e+06	4.55794e+06	5.30563e+06	5.72867e+06
C24H40O20	Cyclobis-1,6-alpha-nigerosyl; Cycloalternan;	NULL		458910	307117	133435	402821	216909	210582	298957	217219	542759
C4H9NO	4-Aminobutyraldehyde; 4-Aminobutanal;	map00330 Arginine and proline metabolism; map00410 beta-Alanine metabolism; map01100 Metabolic pathways		11762.5	10586.2	16551	13364.5	18965.2	14233.8	14513	17737.8	18214
C36H37O17+	Pelargonidin 3-O-beta-D-glucoside 5-O-(6-coumaroyl-beta-D-glucoside);	map00942 Anthocyanin biosynthesis		25356.6	31704.6	36700.6	33369.8	32311.7	39123.5	27596.1	29298.2	24905.2
C4H6O3	Acetoacetate; 3-Oxobutanoic acid; beta-Ketobutyric acid; Acetoacetic acid;	map00072 Synthesis and degradation of ketone bodies; map00280 Valine, leucine and isoleucine degradation; map00310 Lysine degradation; map00350 Tyrosine metabolism; map00640 Propanoate metabolism; map00643 Styrene degradation; map00650 Butanoate metabolism; map01100 Metabolic pathways; map01120 Microbial metabolism in diverse environments; map02020 Two-component system		49274.5	41837.4	56593.3	42772.1	49079.1	50624.3	45535.8	38650.2	48981.1
C43H42ClN3O13	C-1027 Chromophore; C-1027;	map01059 Biosynthesis of enediyne antibiotics; map01130 Biosynthesis of antibiotics		54571.1	28846.1	18290.4	42279.2	36965.8	22965.5	46037.7	34407	42007.4
C5H6O3	Tulipalin B; (4S)-4-Hydroxy-3-methylideneoxolan-2-one;	NULL		525026	485127	599209	427097	464084	600180	416609	358911	549996
C5H6O2	Furfuryl alcohol; 2-Furancarbinol; 2-Furanmethanol;	map00365 Furfural degradation; map01120 Microbial metabolism in diverse environments		345243	281652	307723	340466	488955	440464	371660	422956	492613
C37H66N7O18P3S	(S)-3-Hydroxyhexadecanoyl-CoA;	map00062 Fatty acid elongation; map00071 Fatty acid degradation; map01100 Metabolic pathways; map01212 Fatty acid metabolism		31424	535434	938161	30575.4	350461	743515	34434.9	87158.3	264624
C39H62N7O19P3S	3-Oxo-OPC8-CoA;	map00592 alpha-Linolenic acid metabolism; map01100 Metabolic pathways; map01110 Biosynthesis of secondary metabolites		27243.2	100775	99049.7	31428.5	56034.6	59543.9	25765.2	38955.4	45648.3
C7H14N2O3	N5-Ethyl-L-glutamine; L-Theanine;	NULL		60721.1	53576.7	64640.7	66587.9	69213.7	52810.3	82879.4	59523.5	64858.5
C6H8O6	D-Glucurono-6,2-lactone;	NULL		107879	91762.7	86622.5	110682	98727.7	109797	113660	88426.9	79397.6
C7H9N3O2	2,4-Diamino-6-nitrotoluene;	map00633 Nitrotoluene degradation; map01120 Microbial metabolism in diverse environments		4277.15	9346.27	24298.8	6564.41	3732.04	3948.25	5267.12	5181.17	5081.4
C10H8ClN3O2	Drazoxolon;	NULL		129232	133001	108843	145485	101929	133292	117825	123303	98052.3
C8H14N2O4	Proclavaminic acid; Proclavaminate;	map00331 Clavulanic acid biosynthesis; map01130 Biosynthesis of antibiotics		22276.8	15250.2	9767.81	21472.2	16656.4	12284	20822.4	23173.5	21823.5
C12H12N2O2S	Dapsone; 4,4'-Sulfonylbisbenzenamine; Diaphenylsulfone;	NULL		193487	195903	184368	181930	167406	180242	170131	217129	182761
C10H17N3O6	N-Succinyl-L-citrulline;	NULL		1.05703e+06	694258	702137	1.14758e+06	1.20322e+06	684804	1.32338e+06	1.42999e+06	912535
C21H21NO2S	Tazarotene;	NULL		71894.4	58601.4	70400.9	87152.8	51974.5	60310.9	73637.9	68753.4	57676.9
C12H22O11	Kojibiose; 2-O-alpha-D-Glucopyranosyl-D-glucose;	NULL		1.81057e+08	1.29481e+08	6.70463e+07	1.78044e+08	1.39901e+08	1.02285e+08	1.70564e+08	1.50381e+08	1.81811e+08
C13H19N2O10P	5'-Butyrylphosphouridine;	NULL		1.10534e+08	7.51292e+07	6.92531e+07	1.25016e+08	1.21339e+08	8.3581e+07	1.28607e+08	1.14793e+08	1.24875e+08
C24H30O11	Harpagoside;	NULL		58842.8	53274.1	40556.5	86590.3	92176.7	122402	76307.2	61712.8	61398.3
C14H22N2O16P2	UDP-apiose; UDP-D-apiose; UDP-alpha-D-apiose;	map00520 Amino sugar and nucleotide sugar metabolism		28599.8	122826	198690	23438.4	92237.8	136822	21593.3	7113.79	21319.5
C15H24N2O17P2	UDP-glucose; UDPglucose; UDP-D-glucose; Uridine diphosphate glucose; UDP-alpha-D-glucose;	map00040 Pentose and glucuronate interconversions; map00052 Galactose metabolism; map00053 Ascorbate and aldarate metabolism; map00240 Pyrimidine metabolism; map00500 Starch and sucrose metabolism; map00520 Amino sugar and nucleotide sugar metabolism; map00524 Neomycin, kanamycin and gentamicin biosynthesis; map00561 Glycerolipid metabolism; map00908 Zeatin biosynthesis; map01051 Biosynthesis of …		668461	3.52288e+06	5.6189e+06	506338	2.12984e+06	3.08333e+06	613802	102915	522095
C40H54O2	3'-Hydroxyechinenone;	map00906 Carotenoid biosynthesis		28349.1	214917	176140	39384	209337	253798	39050.8	89255.5	123766
C29H36O15	Verbascoside; Acteoside;	NULL		186135	179260	173472	284791	229255	186343	264488	205171	219846
C27H37N9O7S3	Cefotiam hexetil;	NULL		182214	397731	354805	146661	194427	379764	134557	216686	238561
C25H48N6O14	N3'-Acetylneomycin;	NULL		16393	58738.1	81975.3	11739.8	8562.25	55512.1	13532.5	14308.2	14758.3
C42H32O9	Canaliculatol;	NULL		180590	300998	258189	184087	274926	364640	188351	210290	218464
C37H42N4O9S3	Alphazurine FG;	NULL		2.64178e+06	1.44517e+07	2.9614e+07	2.86276e+06	8.40102e+06	2.122e+07	2.70226e+06	4.48128e+06	4.93484e+06
C35H44N4O16	Formylmethanofuran;	map00680 Methane metabolism; map01100 Metabolic pathways; map01120 Microbial metabolism in diverse environments; map01200 Carbon metabolism		90669.2	137388	254344	110324	154525	177405	105322	122745	109731
C42H47O23+	Delphinidin-3-(p-coumaroyl)-rutinoside-5-glucoside;	map00942 Anthocyanin biosynthesis		193195	560447	801421	212042	389770	724659	186865	309085	291393
C44H50CoN4O16	Cobalt-precorrin 4;	map00860 Porphyrin and chlorophyll metabolism; map01100 Metabolic pathways		8685.96	73767.1	116807	8778.05	21025.4	59204.5	9175.89	7562.65	10654.8
C37H60N7O19P3S	3-Hydroxy-OPC6-CoA;	NULL		14628.5	96462.2	127372	11451.3	42136	69350.4	20121.3	17681.2	20249.8
C4H6O4	(3R)-3-Hydroxy-4-oxobutanoate;	NULL		79014.6	102780	73243.5	67640	60581.9	84334.8	58950.4	73788.9	46390.1
C7H13NO2	Stachydrine; Proline betaine; L-Proline betaine;	NULL		4535.32	3536.86	5646.67	5003.17	6068.06	6328.81	5804.94	5502.67	6786.51
C5H11N3O2	4-Guanidinobutanoate; 4-Guanidinobutyric acid;	map00330 Arginine and proline metabolism; map01100 Metabolic pathways		64361.8	130528	189580	60001.4	65361.3	71507.7	59887.2	87773	148141
C6H6O6	cis-Aconitate; cis-Aconitic acid;	map00020 Citrate cycle (TCA cycle); map00630 Glyoxylate and dicarboxylate metabolism; map00660 C5-Branched dibasic acid metabolism; map00720 Carbon fixation pathways in prokaryotes; map01060 Biosynthesis of plant secondary metabolites; map01061 Biosynthesis of phenylpropanoids; map01062 Biosynthesis of terpenoids and steroids; map01063 Biosynthesis of alkaloids derived from shikimate pathway; map…		334462	410228	290784	282289	245395	333544	235422	315989	204654
C3H7NO2S	L-Cysteine; L-2-Amino-3-mercaptopropionic acid;	map00260 Glycine, serine and threonine metabolism; map00270 Cysteine and methionine metabolism; map00311 Penicillin and cephalosporin biosynthesis; map00332 Carbapenem biosynthesis; map00430 Taurine and hypotaurine metabolism; map00460 Cyanoamino acid metabolism; map00480 Glutathione metabolism; map00730 Thiamine metabolism; map00770 Pantothenate and CoA biosynthesis; map00920 Sulfur metabolism; …		28947.8	26359	39968.3	28387.4	23987	41408.3	32022.9	28976.7	31633.8
C6H8O7	D-Galactaro-1,5-lactone;	map00053 Ascorbate and aldarate metabolism		4.1024e+06	4.82938e+06	3.74765e+06	3.80781e+06	3.10197e+06	4.25036e+06	3.01602e+06	4.26954e+06	2.8039e+06
C9H12O4	cis-3-(Carboxy-ethyl)-3,5-cyclo-hexadiene-1,2-diol; cis-3-(2-Carboxy-ethyl)-3,5-cyclo-hexadiene-1,2-diol; 3-(cis-5,6-Dihydroxycyclohexa-1,3-dien-1-yl)propanoate;	map00360 Phenylalanine metabolism; map01120 Microbial metabolism in diverse environments; map01220 Degradation of aromatic compounds		87956.9	76723.1	97918.8	84705	82330.6	239567	79868.5	75869.9	96404.2
C8H13NO4	N-(3-(S)-Hydroxybutyryl)homoserine lactone;	map02020 Two-component system		61340.6	76361.4	64483	78652.9	62328.7	74172.9	71104.8	71186.6	61042.5
C6H7NO4	5-Nitro-2-furfuryl methyl ether; NF 45;	NULL		54825	51369.2	53642.4	62473.6	49424	57123.2	58622.7	56640	52508
C5H6O6	(4R)-4-Hydroxy-2-oxoglutarate; (R)-2-Hydroxy-4-oxopentanedioate; D-4-Hydroxy-2-oxoglutarate;	map00330 Arginine and proline metabolism; map01100 Metabolic pathways		78033.8	199194	114712	65611.1	84913.2	178456	67608.1	109606	179710
C8H14N2O5	gamma-L-Glutamyl-D-alanine; L-gamma-Glutamyl-D-alanine;	NULL		17353.6	12868.1	13637	20498.3	16701.8	12950.6	18142.9	16483.8	19738.4
C5H9O8P	D-Xylono-1,4-lactone 5-phosphate;	NULL		63332.5	47947.1	66034.3	72793.1	68234.2	79766.3	73815.6	56893.7	57370.5
C8H10N2O4	L-Mimosine; Leucenol; (S)-2-Amino-3-(3-hydroxy-4-oxo-4H-pyridin-1-yl)propanoate;	NULL		142879	120189	129831	155524	122509	110554	145381	151957	132882
C16H12N2O4	3,3'-Dimethoxybenzidine-4,4'-diisocyanate;	NULL		54434	52896.8	68495.7	66377.9	59979.1	55537.7	62594.2	66909.1	61755.3
C18H19ClN2O2	Halofenozide;	NULL		75162.3	73451.6	65559.6	99522.5	69943.6	71518	87512.6	88741.5	69275.7
C10H14N5O7P	dGMP; 2'-Deoxyguanosine 5'-monophosphate; 2'-Deoxyguanosine 5'-phosphate; Deoxyguanylic acid; Deoxyguanosine monophosphate;	map00230 Purine metabolism; map01100 Metabolic pathways		54954.3	217942	139746	62164.2	126050	120782	68640.9	28488.7	73007.6
C18H20N3NaO3S	Rabeprazole sodium;	NULL		91428	108435	111447	87470.3	96680.8	97924.4	85249.7	81925.7	92188.8
C12H23NO10	6-(alpha-D-Glucosaminyl)-1D-myo-inositol;	NULL		45106.8	42939.2	43702.2	43428.4	21434.7	19394.8	42558.7	50521.3	36725.7
C16H28O7	(2S,3S)-2-Hydroxytridecane-1,2,3-tricarboxylate;	NULL		352638	242659	150128	338588	242219	182574	350630	283339	361503
C21H18O8	Dihydro-NAME; Dihydro-nogalonic acid methyl ester;	map01057 Biosynthesis of type II polyketide products; map01130 Biosynthesis of antibiotics		5.05465e+07	3.8939e+07	1.96781e+07	5.05837e+07	3.85541e+07	3.05228e+07	4.75602e+07	4.30371e+07	5.13098e+07
C20H28N2O3	Oxyphencyclimine;	NULL		157812	106483	63230.2	144721	121278	98007.1	162513	127233	157748
C26H28ClNO	Clomiphene;	NULL		325153	217983	85945	299956	243880	147872	323210	251688	307609
C20H20O7	Tangeretin; 5,6,7,8,4'-Pentamethoxyflavone;	NULL		42563.8	43613.6	60914.7	44989.7	39353.7	51859.7	52544.8	48254.1	44202
C12H14N6O7S	Pyrazosulfuron;	NULL		147031	137040	172091	150470	114099	134613	154310	137656	145013
C22H22N2O7	Anhydrotetracycline;	map00253 Tetracycline biosynthesis; map01057 Biosynthesis of type II polyketide products; map01130 Biosynthesis of antibiotics		18351.6	11808.1	9781.15	21858.5	18090.2	13393.6	20406.7	14293.2	27540
C20H35NO14	Validamycin B;	map00525 Acarbose and validamycin biosynthesis; map01130 Biosynthesis of antibiotics		3850.37	142641	92.7832	1976.08	60596.2	41150.1	4504.19	1150.22	3878.5
C27H32O14	Naringin chalcone;	NULL		191858	139483	77937.3	190060	139428	111393	186590	153745	141884
C27H32O14	Cascaroside A;	NULL		735719	1.71052e+06	2.3323e+06	645194	910838	1.88742e+06	600256	1.07114e+06	868473
C6H6O4	(S)-5-Oxo-2,5-dihydrofuran-2-acetate; (+)-Muconolactone;	map00362 Benzoate degradation; map01100 Metabolic pathways; map01120 Microbial metabolism in diverse environments; map01220 Degradation of aromatic compounds		5007.27	9504.03	22985.8	4852.3	5274.02	16122.3	4065.79	5218.42	6107.67
C6H13NO3	Fagomine;	NULL		605930	564751	733719	638795	646372	612426	652711	694020	750923
C7H15NO3	L-Carnitine; L-gamma-Trimethyl-beta-hydroxybutyrobetaine; Vitamin BT; 3-Carboxy-2-hydroxy-N,N,N-trimethyl-1-propanaminium hydroxide, inner salt; Levocarnitine; (R)-Carnitine;	map04714 Thermogenesis; map04976 Bile secretion		18005.9	20582.3	23700.9	17747.5	16139.1	18921.6	18410.5	19023.4	18090.3
C7H10O5	Shikimate; Shikimic acid; 3,4,5-Trihydroxy-1-cyclohexenecarboxylic acid;	map00400 Phenylalanine, tyrosine and tryptophan biosynthesis; map01060 Biosynthesis of plant secondary metabolites; map01061 Biosynthesis of phenylpropanoids; map01063 Biosynthesis of alkaloids derived from shikimate pathway; map01070 Biosynthesis of plant hormones; map01100 Metabolic pathways; map01110 Biosynthesis of secondary metabolites; map01130 Biosynthesis of antibiotics; map01230 Biosynth…		5284.55	7909.81	19163.1	6204.37	6689.49	14734.7	6138.41	6754.81	8835.62
C11H20O2	11-Undecanolactone;	NULL		15802.1	48233.6	299371	51529.5	40966.6	48542.2	42625.2	49893	39846.6
C9H18N2O5	2,6-Diamino-7-hydroxy-azelaic acid;	NULL		6432.89	6657.75	7344.51	7337.09	7331.05	7519.14	7631.99	7519.18	6979.03
C18H19N3O2	Diacetylaminoazotoluene; Pellidole; Periphermine;	NULL		107474	125481	146506	187647	157974	154197	151051	136279	105310
C25H29N3O2	Pleurostyline;	NULL		104021	25180	15432.9	102730	58371.6	32078.1	71594.1	44694.5	214490
C31H36O10	Lappaol D;	NULL		12426.5	13509.1	19255.2	17141.5	21025.3	19210.6	16961.9	13551.5	16837.8
C17H27N3O16P2	UDP-2-acetamido-2,6-dideoxy-beta-L-talose; UDP-N-acetyl-beta-L-pneumosamine;	NULL		62699.7	10119.3	9236.05	31139.4	47877.3	15706.3	48541.6	23508.6	19366.3
C35H48ClN3O10S	Mertansine; DM 1;	NULL		47775.8	50904	45308.7	41476.6	41244.2	49570.7	35196.2	44310.3	43422.5
C5H11NO	5-Aminopentanal;	map00310 Lysine degradation; map00960 Tropane, piperidine and pyridine alkaloid biosynthesis; map01100 Metabolic pathways; map01110 Biosynthesis of secondary metabolites; map01120 Microbial metabolism in diverse environments		42868.6	39035.3	48295.6	44055.2	47027.2	44332.1	47168.5	47255.2	53874.7
C40H50O18	Premithramycin A3';	map01057 Biosynthesis of type II polyketide products; map01130 Biosynthesis of antibiotics		17557	26408.5	34678	16927.6	17131.2	26423.5	16081.4	16134.8	23021.3
C39H42N6O18	Corynebactin; Bacillibactin;	map01053 Biosynthesis of siderophore group nonribosomal peptides; map01110 Biosynthesis of secondary metabolites; map01130 Biosynthesis of antibiotics		27978.5	49741.1	43385.9	27306.3	32287.8	45720.7	22205.8	22282.6	35217.9
C27H46N7O18P3S	(S)-Hydroxyhexanoyl-CoA; (S)-3-Hydroxyhexanoyl-CoA;	map00062 Fatty acid elongation; map00071 Fatty acid degradation; map01100 Metabolic pathways; map01212 Fatty acid metabolism		115926	10041.3	6716.38	17145.3	28921.7	7910.94	64573.1	35837.7	16336.5
C45H52CoN4O16	Cobalt-precorrin 5A;	map00860 Porphyrin and chlorophyll metabolism; map01100 Metabolic pathways		20416.2	26985.1	36816	21788.9	28126.3	32899.8	22938.6	18817.6	24525.2
C11H19N3O6	Ophthalmate; gamma-L-Glutamyl-L-2-aminobutyrylglycine;	map00270 Cysteine and methionine metabolism; map01100 Metabolic pathways		11542.9	9756.38	12196.6	42408	48129.2	29592	33956.6	36700.1	8487.64
C15H15N4NaO4	Sodium caffeine benzoate;	NULL		54064.4	64063	97150	61237.1	51607.9	60167.6	57301.9	57855.5	47092
C18H21ClN2O3	Compound VII; 5-(5-(6-Chloro-4-(4,5-dihydro-2-oxazolyl)phenoxy)pentyl)-3-methylisoxazole;	NULL		65633	50607.2	61001.8	70315.9	42833.7	47501.9	56124.7	73609	45661.6
C15H23N5O14P2	Phosphoribosyl-AMP; N1-(5-Phospho-D-ribosyl)-AMP; 1-(5-Phosphoribosyl)-AMP; 1-(5-Phospho-beta-D-ribosyl)-AMP;	map00340 Histidine metabolism; map01100 Metabolic pathways; map01110 Biosynthesis of secondary metabolites; map01230 Biosynthesis of amino acids		85913	130711	114355	54934	148305	127879	85331.4	25584.8	72049.9
C30H28O11	Protoaphin aglucone; Protoaphin aglycone;	NULL		68296.2	59874	48696.6	79582.7	57087.7	53416.5	75747	66803.2	62521.8
C20H31N4O16P	CMP-N-acetylneuraminate; CMP-N-acetyl-beta-neuraminate;	map00520 Amino sugar and nucleotide sugar metabolism; map01100 Metabolic pathways		45642.9	82536.3	54886.6	46353.8	54161.7	63142	45933.7	49762.9	61532
C23H38N7O17P3S	Acetyl-CoA; Acetyl coenzyme A;	map00010 Glycolysis / Gluconeogenesis; map00020 Citrate cycle (TCA cycle); map00061 Fatty acid biosynthesis; map00062 Fatty acid elongation; map00071 Fatty acid degradation; map00072 Synthesis and degradation of ketone bodies; map00254 Aflatoxin biosynthesis; map00280 Valine, leucine and isoleucine degradation; map00290 Valine, leucine and isoleucine biosynthesis; map00300 Lysine biosynthesis; ma…		82257.3	120957	91621.1	104160	94620.2	84778.3	93321.3	112434	97817.9
C30H43N8O18P3S	2-Aminobenzoylacetyl-CoA;	map00405 Phenazine biosynthesis; map01130 Biosynthesis of antibiotics		42575.1	42546	43495.9	83027.3	106129	42871.9	80438	46522.9	67271.6
C30H45N8O17P3S	beta-Phenylalanoyl-CoA; (R)-beta-Phenylalanoyl-CoA; (R)-3-Amino-3-phenylpropanoyl-CoA; Amino phenylpropanoyl-CoA;	NULL		1.39467e+06	230671	155988	236976	443116	194113	609035	402273	275709
C37H60N8O25P2	UDP-N-acetylmuramoyl-L-alanyl-D-glutamyl-L-lysyl-D-alanine; UDP-N-acetylmuramoyl-L-alanyl-D-gamma-glutamyl-L-lysyl-D-alanine;	map01502 Vancomycin resistance		20121.8	32841.9	34531.6	17622.7	28125	26529.2	22653.2	26321.9	30937.3
C4H2O3	Moniliformin;	NULL		121913	89555.8	109157	134872	128562	135001	142447	109520	104766
C6H6N2O3	3-Imidazole-2-oxopropanoate;	NULL		14975	15093.8	10802	231300	252712	223953	120329	240848	192420
C8H10N4O3	1,3,7-Trimethyluric acid; 1,3,7-Trimethylurate;	map00232 Caffeine metabolism; map01120 Microbial metabolism in diverse environments		9736.77	30195.8	140612	8639.63	12466.4	68620.7	8996.62	9893.32	14604.9
C15H22O	(+)-8-Hydroxycalamenene;	NULL		291592	305080	396626	374309	354172	374039	368764	307560	285296
C15H20O4	Artemisiifolin;	NULL		10487.7	7315.34	8504.75	8664.69	7999.44	8149.82	9703.16	8540.82	9836.01
C17H16O5	Coelogin;	NULL		48280.7	75048.8	88117.7	47114.6	54456.8	88333.3	51000.8	31794.4	19093.4
C20H25ClO8	Eupachloroxin;	NULL		43401	46458	53572.2	40560.8	44113.6	49944.2	40601.4	41697.9	44741.2
C21H30O8S	Cortisol 21-sulfate;	NULL		1.04788e+07	4.90656e+06	3.63448e+06	1.16027e+07	9.65131e+06	5.49587e+06	1.10223e+07	9.1996e+06	1.45579e+07
C30H50O2	Betulin;	NULL		109993	5286.87	11894.7	150449	84287.2	12718.5	124216	76735.5	107359
C20H22O10	Plicatic acid;	NULL		30111.3	30163	30954.6	297531	512047	552400	355518	166757	525654
C15H24N2O16P2	UDP-L-rhamnose; UDP-rhamnose; UDP-beta-L-rhamnose;	map00520 Amino sugar and nucleotide sugar metabolism		67231.2	99643.3	130360	54662.4	62252.4	74977.7	58177.9	46707.6	51844.4
C25H30N8O10	(6R)-10-Formyltetrahydropteroyldiglutamate; 10-Formyl-THF-L-glutamate; (6R)-10-HCO-H4PteGlu2;	NULL		280482	1.14454e+06	1.21749e+06	198449	495947	1.53149e+06	210837	338261	362311
C17H26N4O17P2	UDP-2-acetamido-3-amino-2,3-dideoxy-alpha-D-glucuronate;	map00520 Amino sugar and nucleotide sugar metabolism		87261	118994	112806	84358.6	117227	121972	82612.5	96977.8	114278
C27H35N9O15P2	FADH2;	map00740 Riboflavin metabolism; map01100 Metabolic pathways; map04714 Thermogenesis		15169.5	23138.3	19492	24487.9	28534.6	23096.8	20673.4	16225.6	21682
C28H41N8O17P3S	Anthraniloyl-CoA; 2-Aminobenzoyl-CoA;	map00405 Phenazine biosynthesis; map00627 Aminobenzoate degradation; map00999 Biosynthesis of secondary metabolites - unclassified; map01120 Microbial metabolism in diverse environments; map01130 Biosynthesis of antibiotics		35840.7	41716.5	31043.6	49505.3	42606.6	40504.9	48433.1	49044.8	47834.6
C7H8O2	3-Hydroxybenzyl alcohol; 3-Hydroxybenzenemethanol;	map00623 Toluene degradation; map01120 Microbial metabolism in diverse environments; map01220 Degradation of aromatic compounds		19466.2	22018.9	13044.3	17074.2	20311.5	24784.3	21256.9	15089	15080.4
C4H6O5	(S)-Malate; L-Malate; L-Apple acid; L-Malic acid; L-2-Hydroxybutanedioic acid; Malate; Malic acid;	map00020 Citrate cycle (TCA cycle); map00620 Pyruvate metabolism; map00630 Glyoxylate and dicarboxylate metabolism; map00680 Methane metabolism; map00710 Carbon fixation in photosynthetic organisms; map00720 Carbon fixation pathways in prokaryotes; map01060 Biosynthesis of plant secondary metabolites; map01061 Biosynthesis of phenylpropanoids; map01062 Biosynthesis of terpenoids and steroids; map…		1.38111e+07	1.7416e+07	1.60681e+07	9.66977e+06	1.15375e+07	2.00425e+07	1.05407e+07	1.26117e+07	1.14826e+07
C10H10O3	Vermelone; 3,4-Dihydro-3,8-dihydroxy-1(2H)-naphthalenone;	NULL		13501.4	16423.3	21803.5	15763.7	16119.7	41101	15235.7	15653.7	15257.9
C10H10O2	Eugenol quinone methide;	NULL		12250.2	63341.1	62197.3	13770.5	82666.5	1.39971e+06	14944.8	14596.1	21763.6
C6H8O3	Dihydrophloroglucinol;	map00627 Aminobenzoate degradation; map01120 Microbial metabolism in diverse environments		45177.4	39353.7	45661.8	43260.8	45829.7	48688.9	59563.1	43572.1	37126.3
C11H12O2	Prenylbenzoquinone;	NULL		313965	368045	362384	295841	323235	334467	330509	341188	237502
C17H23N3O4	Primidolol;	NULL		131427	89187.3	77816	156504	144834	134371	150960	122600	112191
C15H12F3NO4	Fluazifop;	NULL		41010.4	24127.9	56056	49765.2	48939.8	34159.9	62535	53309.4	33027.9
C16H18N4O7S	Bensulfuron-methyl; Bensulfuron methyl; Methyl bensulfuron;	NULL		15451.8	14802.7	14924.4	16338.5	15591.2	16968	16807.1	15448.8	13320.1
C8H17NO12P2	N-Acetyl-D-glucosamine 1,6-bisphosphate; N-Acetyl-alpha-D-glucosamine 1,6-bisphosphate;	NULL		39702.2	216868	270243	44044.6	206068	289841	46291.8	27490.7	52307.1
C14H14N8O4S3	Cefazolin;	map04976 Bile secretion		155301	155015	381098	162126	130708	179726	162355	109678	132123
C20H28O10	Furcatin;	NULL		7841.83	8526.14	18266.9	8566.93	11010.8	13365	8923.47	5971.11	6088.81
C10H16N5O12P3	dATP; 2'-Deoxyadenosine 5'-triphosphate; Deoxyadenosine 5'-triphosphate; Deoxyadenosine triphosphate;	map00230 Purine metabolism; map01100 Metabolic pathways		75032.1	43746.3	37487.7	72329.9	64856	41125.1	76381.6	62354	74926.2
C19H19ClN3NaO6S	Sodium cloxacillin monohydrate; Cloxacillin sodium;	NULL		15899.9	20475.9	25590.6	19903.3	19844.3	24156.3	21655.7	21174	25495.7
C33H25F3O4	Flocoumafen;	NULL		197953	139163	59102.6	166224	137421	95734.8	163856	161034	157539
C27H29N3O9	Myxochelin C;	NULL		497345	434203	35966.2	385061	417509	358838	530607	212542	360996
C21H28N7O14P2+	NAD+; NAD; Nicotinamide adenine dinucleotide; DPN; Diphosphopyridine nucleotide; Nadide; beta-NAD+;	map00190 Oxidative phosphorylation; map00730 Thiamine metabolism; map00760 Nicotinate and nicotinamide metabolism; map00983 Drug metabolism - other enzymes; map01100 Metabolic pathways; map04152 AMPK signaling pathway; map04211 Longevity regulating pathway; map04212 Longevity regulating pathway - worm; map04925 Aldosterone synthesis and secretion; map04977 Vitamin digestion and absorption		250488	217996	314945	259083	199351	155226	351008	244453	209253
C4H6	1,3-Butadiene;	NULL		11731.2	7193.95	9447.04	13507	12581.4	10832.2	13386.2	11882.9	15590.3
C9H6O3	Umbelliferone; 7-Hydroxycoumarin;	map01061 Biosynthesis of phenylpropanoids; map01110 Biosynthesis of secondary metabolites		370524	390398	424044	304237	357893	513339	334382	298076	383266
C13H18ClNO2	Dimethachlor;	NULL		24084.6	22587.7	24280.8	24431.2	20828.4	22416.6	22950	23156.9	19002.2
C24H16O11	11-O-Demethylpradinone II;	NULL		17878.4	14849.8	12740	20378.5	22128.8	17492.8	23844.7	20655.2	13866.7
C6H18O24P6	Phytic acid; Phytate; myo-Inositol hexakisphosphate; 1D-myo-Inositol 1,2,3,4,5,6-hexakisphosphate; D-myo-Inositol 1,2,3,4,5,6-hexakisphosphate; myo-Inositol 1,2,3,4,5,6-hexakisphosphate; Inositol 1,2,3,4,5,6-hexakisphosphate; 1D-myo-Inositol hexakisphosphate;	map00562 Inositol phosphate metabolism; map01100 Metabolic pathways; map04070 Phosphatidylinositol signaling system		406242	601011	351560	137208	303160	436055	164495	541719	235236
C7H13NO3	(-)-Betonicine; Betonicine; trans-4-Hydroxy-L-proline betaine;	NULL		6439.32	6835.44	7463.23	8065.85	6435.44	6852.34	7485.22	8970.09	8926.27
C15H12Cl2O4	Diclofop;	NULL		20764.2	22990.7	37514.7	16178	19037.5	35010.5	20092.6	18693.6	16903.6
C6H14O12P2	beta-D-Fructose 1,6-bisphosphate;	map00010 Glycolysis / Gluconeogenesis; map00030 Pentose phosphate pathway; map00051 Fructose and mannose metabolism; map01060 Biosynthesis of plant secondary metabolites; map01061 Biosynthesis of phenylpropanoids; map01062 Biosynthesis of terpenoids and steroids; map01063 Biosynthesis of alkaloids derived from shikimate pathway; map01100 Metabolic pathways; map01110 Biosynthesis of secondary meta…		213944	270943	407643	226012	444285	562966	209420	207243	250056
C20H13N3O8	Xanthommatin;	NULL		56452	51753.6	52733.3	43684.6	61671.8	64815.6	55750.1	48937.4	48015
C2H7O4P	2-Hydroxyethylphosphonate; (2-Hydroxyethyl)-phosphonic acid;	map00440 Phosphonate and phosphinate metabolism; map01130 Biosynthesis of antibiotics		1253.15	903.564	1191.04	8206.75	13813.3	13799.4	7416.39	5883.8	11505.5
W	Tungsten;	map02010 ABC transporters		18845.3	15964.7	16184.1	20560.8	19689.3	14958.1	22225.4	19263.7	17627.5
C7H13N3O5	1D-1-Guanidino-1-deoxy-3-dehydro-scyllo-inositol; Amidino-3-keto-scyllo-inosamine;	map00521 Streptomycin biosynthesis; map01130 Biosynthesis of antibiotics		72369.4	55288.8	52896	51999.7	48813.7	36960.5	52347.5	53877	67092
C12H7Cl3O2	Triclosan;	NULL		34087	34959.3	47579.1	25994.7	30538.4	45142.4	31230.6	34290.5	29457.6
C19H12O5	Dehydrorabelomycin;	map01057 Biosynthesis of type II polyketide products; map01130 Biosynthesis of antibiotics		56785.3	38295.9	71665.6	49114	55510.9	58587.4	54026.9	40356.9	49489.7
C10H6Cl6O	1-Hydroxychlordene; Chlordene hydroxide;	NULL		10043.1	4270.23	9792.41	10973.2	12177.1	6657.07	14309.9	9989.54	10818.2
C12H15AlO9	Aluminum acetoacetate;	NULL		11282.1	12648.9	39330.7	6777.71	10809.8	19387.4	7970.34	7370.61	9959.88
C16H14O8	5,5'-Dehydrodivanillate;	map00627 Aminobenzoate degradation; map01120 Microbial metabolism in diverse environments		33060.8	18755.5	43545.5	40112.3	39495.8	25612.4	52011.6	43964.6	25986.5
C6H15O15P3	D-myo-Inositol 1,4,5-trisphosphate; 1D-myo-Inositol 1,4,5-trisphosphate; Inositol 1,4,5-trisphosphate; Ins(1,4,5)P3;	map00562 Inositol phosphate metabolism; map01100 Metabolic pathways; map04010 MAPK signaling pathway; map04012 ErbB signaling pathway; map04014 Ras signaling pathway; map04020 Calcium signaling pathway; map04022 cGMP-PKG signaling pathway; map04024 cAMP signaling pathway; map04062 Chemokine signaling pathway; map04064 NF-kappa B signaling pathway; map04066 HIF-1 signaling pathway; map04070 Phosph…		147168	153037	160525	96309.6	123555	178224	107664	133348	89755.6
C9H16N3O14P3	CTP; Cytidine 5'-triphosphate; Cytidine triphosphate;	map00240 Pyrimidine metabolism; map00515 Mannose type O-glycan biosynthesis; map01100 Metabolic pathways		31344.6	78704.4	79683.7	48940	156214	296730	48504.9	26431.1	60023.6
C6H16O18P4	1D-myo-Inositol 3,4,5,6-tetrakisphosphate; D-myo-Inositol 3,4,5,6-tetrakisphosphate; Inositol 3,4,5,6-tetrakisphosphate;	map00562 Inositol phosphate metabolism		1.41406e+06	1.53301e+06	882364	774244	856125	1.08487e+06	1.09394e+06	1.2971e+06	683467
C22H23ClN2O9	11a-Hydroxy-7-chlortetracycline;	map00253 Tetracycline biosynthesis; map01130 Biosynthesis of antibiotics		13522.6	9519.41	10964.9	8587.08	9282.11	6646.93	9782.07	10896.7	12856.8
H2O4S	Sulfate; Sulfuric acid;	map00230 Purine metabolism; map00261 Monobactam biosynthesis; map00270 Cysteine and methionine metabolism; map00920 Sulfur metabolism; map01100 Metabolic pathways; map01120 Microbial metabolism in diverse environments; map01130 Biosynthesis of antibiotics; map02010 ABC transporters; map02024 Quorum sensing		1.78725e+07	1.14847e+07	1.92546e+07	1.85908e+07	2.15994e+07	1.39993e+07	2.26252e+07	1.73061e+07	1.90483e+07
C6H8O5	2,4-Diketo-3-deoxy-L-fuconate; 2,4-Diketo-3-deoxy-L-rhamnonate; 2,4-Didehydro-3-deoxy-L-rhamnonate;	map00051 Fructose and mannose metabolism; map01120 Microbial metabolism in diverse environments		111341	112438	108885	114002	109862	133555	114911	107895	97327.8
C9H15N3O11P2	CDP; Cytidine 5'-diphosphate; Cytidine diphosphate;	map00240 Pyrimidine metabolism; map01100 Metabolic pathways		1853.11	4768.37	6381.44	2340.91	13715.4	26059.8	1701.31	970.582	2251.66
C33H34O24	Luteolin 7-O-[beta-D-glucuronosyl-(1->2)-beta-D-glucuronide]-4'-O-beta-D-glucuronide;	map00944 Flavone and flavonol biosynthesis		19421.3	10334.5	9058.94	23563.6	19271.8	9412.99	29289.6	20364.1	21175.1
C6H12N2S4Zn	Ziram;	NULL		83999	73420.3	121875	63921.5	75168.7	93683.3	80792.1	73891.7	79827.9
C6H15O2PS3	Thiometon;	NULL		28999.3	40504	46446.7	18268.7	24831.9	45984.7	24576.3	23064.3	24021.8
C9H6Br2O4	3,5-Dibromo-4-hydroxyphenylpyruvate;	NULL		11057.1	13688.3	23556.6	13685.9	12148.7	15401.3	13460.5	18324.9	12838.5
C13H6Cl6O2	Hexachlorophene;	NULL		17109.8	23757.7	29665.1	10829.2	15193.3	35431.1	9217.99	23136	8724.86
C8H9NO2S	p-Hydroxyphenylacetothiohydroximate;	map00966 Glucosinolate biosynthesis; map01210 2-Oxocarboxylic acid metabolism		5294.95	11882.8	16436.1	4705.12	8038.72	21160.4	5435.22	7936.51	3338.29
C10H12N2O5S	7-Aminocephalosporanic acid; 7-Aminocephalosporinic acid; 7-ACA; (7R)-7-Aminocephalosporanate;	map00311 Penicillin and cephalosporin biosynthesis; map01130 Biosynthesis of antibiotics		22072.8	19558.9	24236.5	19618.5	20343.5	21981	19322.4	17591.5	19929.4
C13H11ClN4O6S	Chlorimuron;	NULL		12908.1	30426	37623.7	11639.3	21882.4	70567.6	14824.3	12614.5	20764.3
C7H13Cl2N2O3P	4-Ketocyclophosphamide;	map00982 Drug metabolism - cytochrome P450		7402.32	6374.24	4548.47	7093.55	5536.28	4287.49	9360.46	6233.85	8795.54
C18H10Cl2F5N5S	Pyriprole;	NULL		1.39878e+06	810847	583432	1.28649e+06	1.17692e+06	707684	1.46495e+06	1.17636e+06	1.38902e+06
C12H8O2S	1,2-Dihydroxydibenzothiophene;	NULL		44534.7	38852.4	45348.9	40655.8	40725.4	36573.2	47029.8	38389.6	46078.5
C12H20ClN3O6S	S-(2-Chloroethyl)glutathione;	map05204 Chemical carcinogenesis		247033	161514	144117	209648	202912	140973	220826	175421	245860
C24H22O13	Malonylgenistin;	map00943 Isoflavonoid biosynthesis		65702.1	55834.9	25558.8	31005.3	53053.9	38928	55036.6	32910.5	50235.6
C26H28O12	Flavonol 3-O-D-xylosylglycoside; Flavonol 3-O-[D-xylosyl-(1->2)-beta-D-glycoside]; Flavonol 3-[beta-D-xylosyl-(1->2)-beta-D-glycoside];	NULL		4098.03	18328	11140.9	3546.21	5359.92	9432.5	6026.53	4584.98	20438.6
C26H30O12	Dalpanin;	NULL		122100	76067.5	43777.2	108909	141583	61898	159127	71096.4	118375
C19H23N6O10P	3-Hydroxy-L-tyrosyl-AMP; 3,4-Dihydroxy-L-phenylalanyl-AMP;	NULL		615461	506331	423126	565337	792323	999492	555965	473102	632543
C15H23N3O15P2	CDP-4-dehydro-6-deoxy-D-glucose;	map00520 Amino sugar and nucleotide sugar metabolism		879593	669402	433409	474475	697744	522285	716859	535500	713552
C30H27N3O15	Enterochelin; Enterobactin; Tri-(2,3-dihydroxy-N-benzoyl-L-serine)-ester; Tri-(N-(2,3-dihydroxybenzoyl)-L-serine)-ester;	map01053 Biosynthesis of siderophore group nonribosomal peptides; map01061 Biosynthesis of phenylpropanoids; map01110 Biosynthesis of secondary metabolites; map01130 Biosynthesis of antibiotics		21276.8	8554.19	3690.29	16034.9	10443.5	5110.56	11958.6	7172.98	22627.2
C6H6O3	Benzene-1,2,4-triol; Hydroxyhydroquinone; 1,2,4-Benzenetriol; 1,2,4-Trihydroxybenzene; Hydroxyquinol;	map00361 Chlorocyclohexane and chlorobenzene degradation; map00362 Benzoate degradation; map00627 Aminobenzoate degradation; map01100 Metabolic pathways; map01120 Microbial metabolism in diverse environments		250603	179072	153781	232578	216142	176152	216879	189063	281240
C26H28ClNO	Toremifene;	NULL		468178	280758	123358	379028	311120	196537	379879	289458	476506
C20H23Cl3N2O2S	Barbamide;	NULL		40888.1	28396.4	35380.1	37824.7	39416.5	28261.4	45425.7	32720.8	42854.1
C24H23O14+	Cyanidin 3-O-(6-O-malonyl-beta-D-glucoside); Cyanidin 3-O-(6'-O-malonylglucoside); Cyanidin-3-(6'-malonylglucoside);	map00942 Anthocyanin biosynthesis		78600.5	78091.6	51701.6	92275	72978.4	72250	98309.1	77130.1	80162.6
C5H6O3	2-Hydroxy-2,4-pentadienoate; cis-2-Hydroxypenta-2,4-dienoate; Oxopent-4-enoate; 2-Oxopent-4-enoate; 2-Hydroxypenta-2,4-dienoate;	map00360 Phenylalanine metabolism; map00362 Benzoate degradation; map00621 Dioxin degradation; map00622 Xylene degradation; map00642 Ethylbenzene degradation; map00643 Styrene degradation; map01100 Metabolic pathways; map01120 Microbial metabolism in diverse environments; map01220 Degradation of aromatic compounds		193074	154472	163814	180096	180620	167540	167153	142490	230319
C27H30Cl2O6	Mometasone furoate;	NULL		213671	166464	73814.6	285374	185022	135027	218740	200432	260265
C15H22N2O15P2	dTDP-4-oxo-alpha-D-xylose; dTDP-4-keto-alpha-D-xylose; dTDP-4-dehydro-alpha-D-xylose;	map00523 Polyketide sugar unit biosynthesis; map01130 Biosynthesis of antibiotics		29125.7	22325.9	14367	22727.6	25996	16130.8	27640.6	20605.2	24193.4
C17H25N3O17P2	UDP-2-acetamido-3-dehydro-2-deoxy-alpha-D-glucopyranose;	NULL		1.96803e+06	1.76012e+06	1.11751e+06	2.56998e+06	1.59598e+06	1.4172e+06	1.88275e+06	2.34352e+06	2.20223e+06
C30H44N7O18P3S	Dihydro-4-coumaroyl-CoA;	map00941 Flavonoid biosynthesis; map01110 Biosynthesis of secondary metabolites		15096.3	12178.8	2551.65	18226.1	15050.8	7464.71	14529.8	14274.2	18221.8
C10H13Cl2FN2O2S2	Tolylfluanid;	NULL		40868.4	41206.7	36255.3	38115.8	35742.4	42559.5	46477.9	41748.7	32861.9
C17H27N3O17P2	UDP-N-acetyl-alpha-D-glucosamine; UDP-N-acetyl-D-glucosamine; UDP-N-acetylglucosamine;	map00520 Amino sugar and nucleotide sugar metabolism; map00524 Neomycin, kanamycin and gentamicin biosynthesis; map00540 Lipopolysaccharide biosynthesis; map00550 Peptidoglycan biosynthesis; map01100 Metabolic pathways; map01130 Biosynthesis of antibiotics; map01502 Vancomycin resistance; map04931 Insulin resistance		43675.1	59003.8	73034	53455.4	138221	244387	75253.3	7335.87	73346.8
C27H22O18	Corilagin;	NULL		128036	167024	107502	162874	128467	139140	124334	157417	132339
C7H7BrN2S	4-Bromophenylthiourea; N-p-Bromophenylthiourea;	NULL		55672.3	60244.8	81085.2	51567.1	46554.4	65987.8	48483.4	57496.1	57604.7
C13H10O8	Tricrozarin A;	NULL		195711	357280	352503	99308.6	156995	436161	135924	176744	139607
C7H11NO7P2	Risedronic acid; Risedronate;	NULL		8816.16	10635.7	27244.8	3554.35	3740.79	9337.33	4620.3	5094.44	7528.15
C10H17NO9S2	Sinigrin; 2-Propenyl glucosinolate;	NULL		112584	128800	91346.2	117365	104771	137831	162484	141451	71287.3
C4H3F7O	Sevoflurane;	NULL		19871	26773.7	28884	16106.1	18829.4	27412.1	16821	22338.6	10918.7
C9H15N5O4	5,6,7,8-Tetrahydromonapterin;	map00790 Folate biosynthesis		3053.64	9431.62	25756.4	2515.1	5240.7	18883.6	2097.71	2439.11	7934.31
C16H15NO4	Arborinine;	NULL		7932.91	13173.8	12227	9198.87	13967.8	14919.4	9738.65	7527.75	10435.1
C13H9Cl2NO4	Chlomethoxyfen;	NULL		37886.1	50754.3	44608.9	32023	32697.2	45766.7	39283	41068.1	33252.7
C18H16OSn	Fentin hydroxide; Fentin;	NULL		27042.8	32868.9	41208.5	25240.6	24373.7	34852.1	32050.8	26220.1	22223.4
C10H13N4O9P	Xanthosine 5'-phosphate; Xanthylic acid; XMP; (9-D-Ribosylxanthine)-5'-phosphate;	map00230 Purine metabolism; map01060 Biosynthesis of plant secondary metabolites; map01065 Biosynthesis of alkaloids derived from histidine and purine; map01100 Metabolic pathways; map01110 Biosynthesis of secondary metabolites		15343.2	20981.2	20918.1	13984.8	19210.5	15187.1	20168.6	14593	17612.7
C8H8Na2O5	Endothal-disodium;	NULL		16420.3	16015.5	16095.8	16486.5	18779.2	13034.1	24844.6	11406.5	16156.6
C7H4Cl3NO3	Trichlopyr; Triclopyr;	NULL		45754.2	30405.8	35476.9	48599.7	40781.9	29221.5	48383.9	48405.2	44365
C8H15NO9S	N-Acetyl-D-glucosamine 6-sulfate;	NULL		61268.9	62223.4	53332.6	68303	69706.8	70540	66371.1	55400.4	45192.2
C5H6O5	2-Oxoglutarate; Oxoglutaric acid; 2-Ketoglutaric acid; alpha-Ketoglutaric acid;	map00020 Citrate cycle (TCA cycle); map00040 Pentose and glucuronate interconversions; map00053 Ascorbate and aldarate metabolism; map00220 Arginine biosynthesis; map00250 Alanine, aspartate and glutamate metabolism; map00300 Lysine biosynthesis; map00310 Lysine degradation; map00340 Histidine metabolism; map00365 Furfural degradation; map00430 Taurine and hypotaurine metabolism; map00471 D-Gluta…		32514.7	30918	22095.5	26311.9	24154	28412.7	40104.5	30900.4	18996.8
C9H5ClN4	CCCP; Carbonyl cyanide m-chlorophenyl hydrazone;	NULL		153014	139877	125202	147360	127430	124312	173186	138272	138646
C10H15N5O10P2	ADP; Adenosine 5'-diphosphate;	map00190 Oxidative phosphorylation; map00195 Photosynthesis; map00230 Purine metabolism; map00908 Zeatin biosynthesis; map01100 Metabolic pathways; map01110 Biosynthesis of secondary metabolites; map01130 Biosynthesis of antibiotics; map04068 FoxO signaling pathway; map04080 Neuroactive ligand-receptor interaction; map04142 Lysosome; map04152 AMPK signaling pathway; map04611 Platelet activation; …		91256.2	99584.6	86145	87248.9	79257.1	98632.8	90258.1	87568.2	66547.9
C18H16N2O8	Betanidin; (2S)-4-[2-[(2S)-2-Carboxy-2,3-dihydro-5,6-dihydroxy-1H-indol-1-yl]ethenyl]-2,3-dihydro-2,6-pyridinedicarboxylic acid;	map00965 Betalain biosynthesis; map01110 Biosynthesis of secondary metabolites		260100	162532	160365	301442	260318	211259	273675	235605	232082
C7H10O5	(2S)-2-Isopropyl-3-oxosuccinate; 3-Carboxy-4-methyl-2-oxopentanoate; 2-Oxo-4-methyl-3-carboxypentanoate;	map00290 Valine, leucine and isoleucine biosynthesis; map01100 Metabolic pathways; map01110 Biosynthesis of secondary metabolites; map01210 2-Oxocarboxylic acid metabolism		55272.9	67085.2	63575.3	51801.1	64639.7	57444.4	68129.2	41998.5	52084.3
C7H7FO2S	Phenylmethanesulfonyl fluoride; Benzenemethanesulfonyl fluoride; PMSF;	NULL		38082.3	24809.3	20448.7	38135.5	33461.7	20939.8	39929.9	34080.1	27582.4
C8H6N4O5	Nitrofurantoin;	NULL		2044.1	20500.1	58828.5	1681.68	9030.77	45732.9	2017.04	2824.51	7911.71
C5H12O10P2	2-Deoxy-D-ribose 1,5-bisphosphate;	NULL		23913.8	19572.7	22969.5	24369.4	24194.7	18425.7	22791.8	21904.2	21970.5
C14H11Cl2NO4	Diloxanide furoate;	NULL		5419.45	12978.4	42011.1	4970.45	6101.99	19887.2	4753.34	5919.94	7125.5
C18H18N2O7	Portulacaxanthin II;	map00965 Betalain biosynthesis; map01110 Biosynthesis of secondary metabolites		2379.83	52569.9	145939	2522.36	27992	113589	3907.16	6503.18	26227.2
C13H15O13S-	Turgorin;	NULL		6853.09	24959.3	84404.6	6876.01	10612.8	67654.4	8071.81	6486.64	13386.7
C6H5NO2	Picolinic acid; 2-Pyridinecarboxylic acid;	map00380 Tryptophan metabolism; map01100 Metabolic pathways		26180.5	22838.3	23089.8	24159.9	19815	22136.5	21633.1	22229	24284.5
C12H19NO2S2	Brugine;	NULL		24528.9	20939.1	20415.4	21562.6	18444.4	21213.7	20370.3	21927.2	24481.7
C11H17N5O8P+	7-Methylguanosine 5'-phosphate; N7-Methyl-GMP;	NULL		1370.39	11329.7	26781.5	1370.26	5512.46	14407.2	854.345	1932.21	5041.64
C4H9N	3-Buten-1-amine;	NULL		4809.28	3472.82	5030.28	5619.87	5835.11	5725.7	5758.44	5282.83	7716.97
C5H4O3	2-Furoate; 2-Furoic acid; 2-Furancarboxylic acid; Pyromucic acid;	map00365 Furfural degradation; map01120 Microbial metabolism in diverse environments		2410.23	556.965	1757.89	261.307	369.243	1418.16	6849.23	928.612	334.238
C34H44O19	Myricoside;	NULL		27452.6	84410.3	82753.6	24313.2	11744.3	32588.4	26790.2	2757.42	137878
C35H42O21	Rindoside;	NULL		4243.34	22949.8	44674.5	1746.44	7018.04	12249	3474.7	2254.51	6935.81
C40H44N2O18	Pradimicin A;	NULL		16066.2	67033.2	72004	7183.85	5312.62	23262.1	11906.8	8998.58	14479.6
C27H44N7O20P3S	(S)-3-Hydroxy-3-methylglutaryl-CoA; Hydroxymethylglutaryl-CoA; Hydroxymethylglutaroyl coenzyme A; HMG-CoA; 3-Hydroxy-3-methylglutaryl-CoA;	map00072 Synthesis and degradation of ketone bodies; map00280 Valine, leucine and isoleucine degradation; map00650 Butanoate metabolism; map00900 Terpenoid backbone biosynthesis; map01060 Biosynthesis of plant secondary metabolites; map01062 Biosynthesis of terpenoids and steroids; map01066 Biosynthesis of alkaloids derived from terpenoid and polyketide; map01070 Biosynthesis of plant hormones; m…		64223.7	579758	798681	57316.9	241449	709359	40053.2	122714	165911
C6H8N2O2	4,5,6,7-Tetrahydroisoxazolo(5,4-c)pyridin-3-ol; THIP; Gaboxadol;	NULL		156467	107438	151726	137543	136771	153399	133607	191477	209122
C17H16N3NaO6S2	Cephapirin sodium; Cefapirin sodium; Sodium cefapirin;	NULL		204459	517287	572403	226042	517212	585928	222841	177599	272133
C18H26N5O8PS2	Lipoyl-AMP;	map00785 Lipoic acid metabolism; map01100 Metabolic pathways		16803.2	95884.8	150326	16021.5	46990.3	114033	14961.9	24597.1	49011.5
C45H38O16	ent-Fisetinidol-(4beta->8)-catechin-(6->4beta)-ent-fisetinidol;	NULL		3532.72	50779.2	104569	4087.59	16382.8	66131.3	4073.33	5099.47	15859.9
C12H15NO9PS2+	Pyridinium-3,5-bisthiocarboxylate mononucleotide; P2TMN; Pyridin-1-ium-3,5-bisthiocarboxylate mononucleotide;	NULL		171764	168248	104277	155682	121985	131057	172819	162621	122943
C5H6N2O2	Thymine; 5-Methyluracil;	map00240 Pyrimidine metabolism; map01100 Metabolic pathways		1549.32	3448.96	4029.79	2757.28	3029.52	3288.28	3027.6	2913.36	3666.95
C5H6N2O	Imidazole-4-acetaldehyde; Imidazole acetaldehyde;	map00340 Histidine metabolism		19782.4	28148.3	32274.8	25609.4	27535.4	36235.5	25930.1	32107.8	42286.6
C6H10N2O2	Ectoine; L-Ectoine; (4S)-2-Methyl-1,4,5,6-tetrahydropyrimidine-4-carboxylate;	map00260 Glycine, serine and threonine metabolism; map01100 Metabolic pathways; map01120 Microbial metabolism in diverse environments		9366.26	20160	26764.8	22114.4	22490.9	20703.5	21772	23427.4	30638.4
C7H7N3O2	N-Methyl-N,4-dinitrosoaniline; N,4-Dinitrosomethylaniline;	NULL		52182.1	55613.6	47089.9	47436.7	48217.6	54365.6	50887.1	53077.5	43146.4
C8H9N3O4	Nicorandil;	NULL		1128.52	3865.47	16120.4	840.658	645.18	1804.16	1936.09	562.433	775.754
C9H16O9	2-O-(alpha-D-Mannosyl)-D-glycerate; alpha-Mannosylglycerate; 2-O-(alpha-D-Mannopyranosyl)-D-glycerate;	map00051 Fructose and mannose metabolism; map02060 Phosphotransferase system (PTS)		35583.3	36980.5	36421.3	36459.5	29754.6	30922.4	53848.5	32931.6	42485.9
C28H29N2O12-	SN38 glucuronide carboxylate form;	NULL		3726.62	20020.6	52682.7	2679.02	13460.2	20316	5944.98	3089.35	16057.7
C11H19NO9S2	Gluconapin; 3-Butenylglucosinolate;	NULL		11951.4	26531.8	42536.1	12802	21781.3	34055.7	12642.5	13457.2	28227.3
C20H15N3O8	5,12-Dihydroxanthommatin;	NULL		8960.89	14369.5	11685	6805.36	13226.8	14272.7	6564.14	8513.28	15235
C19H24N7O8P	N6,N6,O-Tridemethylpuromycin-5'-phosphate;	map00231 Puromycin biosynthesis; map01130 Biosynthesis of antibiotics		2878.09	21478.7	45438.7	6068.54	11102.7	31216.9	4835.1	3282.74	11332.3
C19H37N5O12	6''-O-Carbamoylkanamycin A;	map00524 Neomycin, kanamycin and gentamicin biosynthesis; map01130 Biosynthesis of antibiotics		2430.11	5525.65	10574.4	1406.35	3858.22	8009.38	1134.57	2390.2	4831.91
C6H6N2O3	Imidazol-5-yl-pyruvate; 3-(Imidazol-5-yl)pyruvate; Imidazole pyruvate; Imidazole pyruvic acid;	map00340 Histidine metabolism		2252.07	3190.01	4209.71	455121	511674	351988	305608	422445	434952
C18H32O16	D-Gal alpha 1->6D-Gal alpha 1->6D-Glucose; D-Gal-alpha1->6D-Gal-alpha1->6D-Glucose; Manninotriose;	map00052 Galactose metabolism		1.84928e+06	6.87658e+06	1.36031e+07	1.72352e+06	5.2354e+06	8.34003e+06	2.00231e+06	2.36945e+06	5.03535e+06
C20H34O17	alpha-1,5-L-Arabinotetraose;	map02010 ABC transporters		8446.01	8932.81	17409.1	11975.1	17828	9539.65	17005.3	4685.15	13581
C27H32O12	Flavanone 7-O-[alpha-L-rhamnosyl-(1->2)-beta-D-glucoside];	NULL		5588.22	85610.4	81217.9	9856.26	45496	44564.7	15770.9	21410	560982
C32H40BrN5O5	Bromocriptine;	NULL		21129.7	35009.6	243470	4010.59	31385.4	44327.9	40235.9	6624.75	29166.6
C21H36N7O16P3S	CoA; Coenzyme A; CoA-SH;	map00071 Fatty acid degradation; map00332 Carbapenem biosynthesis; map00770 Pantothenate and CoA biosynthesis; map01100 Metabolic pathways; map01130 Biosynthesis of antibiotics; map04216 Ferroptosis; map04714 Thermogenesis; map04725 Cholinergic synapse; map04975 Fat digestion and absorption; map04977 Vitamin digestion and absorption		554429	1.58812e+06	1.73977e+06	463628	1.02869e+06	1.73048e+06	387628	703017	956350
C34H26O22	Tellimagrandin I; 1-Desgalloyleugeniin;	NULL		5933.85	25319.7	23331.5	6196.01	25757.5	23605.6	8370.28	9404.35	16731.4
C14H19NO7S	p-Hydroxybenzyldesulphoglucosinolate; Desulfo-p-hydroxybenzylglucosinolate;	map00966 Glucosinolate biosynthesis; map01210 2-Oxocarboxylic acid metabolism		54500.1	152617	152713	44826.2	100848	156285	36725.3	67561.4	86269.8
C11H20N4O11P2	CDP-ethanolamine; Cytidine diphosphate ethanolamine;	map00564 Glycerophospholipid metabolism; map01100 Metabolic pathways		3318.9	12287.2	12647.6	3383.04	9015.81	15391.6	2895.16	6096.93	6926.55
C10Cl10O	Chlordecone; Kepone;	NULL		2394.18	22069.2	37509.5	4459.3	11049.9	30351.3	4519.37	2151.54	11805.4
C30H22O12	Luteoskyrin;	NULL		10782.9	39020.8	48917.7	8804.5	23885	43525.1	7183.34	14960.1	25674.9
C9H13N2O9P	Pseudouridine 5'-phosphate;	map00240 Pyrimidine metabolism		131100	249087	378161	122052	223440	207565	176796	39307.6	128929
C13H8O5	Gentisein; 1,3,7-Trihydroxyxanthone;	NULL		16335.7	39531.8	19831.1	31307.9	34997.9	18261.4	24954	47976.8	219224
C5H8N2O2	(R)-5,6-Dihydrothymine; (5R)-Dihydrothymine;	map00240 Pyrimidine metabolism; map01100 Metabolic pathways		32926.4	135866	166105	22519	32109.6	30133.5	21875.2	70316.8	159609
C9H10N4O4	Xanthopterin-B2; 1-(7,8-Dihydro-2,4-dihydroxypteridin-6-yl)-2-hydroxypropan-1-one;	NULL		24858.8	27773.9	26585.5	27773.9	29388.9	35879	30446.6	24945.8	26424.6
C5H5N5	Adenine; 6-Aminopurine;	map00230 Purine metabolism; map00908 Zeatin biosynthesis; map01100 Metabolic pathways		84846.8	704772	1.05712e+06	56145.8	309795	902265	94172.6	169423	406092
C8H18N2O4	Actinamine; Spectinamine;	map01130 Biosynthesis of antibiotics		46911.2	29010.4	40707.1	48300.5	61342.8	57871.9	53864.7	46817.1	85566.9
C11H12O3	cis-1,2-Dihydroxy-1,2-dihydro-7-hydroxymethylnaphthalene;	map00626 Naphthalene degradation; map01120 Microbial metabolism in diverse environments		123152	109346	101030	127456	108037	107681	121300	101968	120104
C5H8O2S	THTC; 2-n-Tetrahydrothiophenecarboxylic acid;	NULL		6.04236e+06	3.47162e+06	3.43422e+06	6.15326e+06	5.33056e+06	3.28102e+06	6.50629e+06	5.76001e+06	6.98731e+06
CH3Hg+	Methylmercury; Methylmercury ion; CH3Hg+;	NULL		26189.1	15551.6	17491.2	29232.9	25735.1	14448.6	29833.2	26776.6	28650.1
C6H10Hg2I2O2	2,5-Bis[(iodomercuri)methyl]-p-dioxane;	NULL		53051.8	72794.3	73091.6	56943.4	85651.9	84829.1	76064.8	119146	52053.1
C9H13NO3	L-Normetanephrine;	map00350 Tyrosine metabolism; map01100 Metabolic pathways		10393.1	78167.2	6027.06	15669.9	23243.7	23627.9	12381.2	12475.9	17261.4
C4H9ClO4S2	2-Chloro-2-hydroxyethyl-CoM;	map00625 Chloroalkane and chloroalkene degradation; map01120 Microbial metabolism in diverse environments		147941	127915	129490	141283	120340	113945	136574	130511	142314
C4H13NO7P2	Alendronic acid; Alendronate; (4-Amino-1-hydroxybutylidene)bisphosphonic acid;	NULL		1.25494e+06	1.19764e+06	1.06249e+06	1.18122e+06	1.13453e+06	1.03204e+06	1.27482e+06	1.24537e+06	1.06809e+06
C14H13Cl2N2O2PS	Phosacetim;	NULL		110219	72689.9	92556.1	153122	95371.9	78860	133271	119781	146762
C8H7Cl2NO2	SWEP;	NULL		252226	253550	207764	230468	220454	205931	237272	247652	205247
C12H18O11	L-Ascorbic acid-2-glucoside; AA-2G;	NULL		7798.26	7970.82	10099.6	9355.37	5705.25	8569.39	7269.81	6888.35	8333.77
C18H15Cl3N2S	Sulconazole;	NULL		63314.1	66308.7	17595.2	46897.3	51318.9	61921.8	71876.7	27756.1	50978.8
C7H4O6	2-Pyrone-4,6-dicarboxylate;	map00362 Benzoate degradation; map00627 Aminobenzoate degradation; map01120 Microbial metabolism in diverse environments		291918	273589	381943	265120	329762	407711	286615	213491	353087
C10H11N4O7P	3',5'-Cyclic IMP; Inosine 3',5'-cyclic monophosphate;	NULL		15039.3	110845	81909.1	22372.6	66250.1	65500.2	26797.2	7545.28	27855
C5H8O5	2-Dehydro-3-deoxy-D-xylonate; 2-Dehydro-3-deoxy-D-arabinonate; 2-Dehydro-3-deoxy-D-pentonate; (4S)-4,5-Dihydroxy-2-oxopentanoate;	map00040 Pentose and glucuronate interconversions		550068	626419	426658	479761	470991	575263	476719	542878	442946
C11H14O4	Sinapyl alcohol; Sinapoyl alcohol;	map00940 Phenylpropanoid biosynthesis; map01061 Biosynthesis of phenylpropanoids; map01100 Metabolic pathways; map01110 Biosynthesis of secondary metabolites		67330.3	84231.9	51853.3	59680.4	72098.4	62750.4	69475	70470.5	71897.4
C9H7Cl5N2O	Chloraniformethan;	NULL		234706	247671	215956	223616	220212	235261	224806	234126	213666
C5H6O5	Dehydro-D-arabinono-1,4-lactone; (5R)-3,4-Dihydroxy-5-(hydroxymethyl)furan-2(5H)-one;	NULL		75538.1	79603.5	66942.5	67407.7	61880	69277.7	60887.6	72941.6	60965.1
C5H6O4	2,5-Dioxopentanoate; 2-Oxoglutarate semialdehyde;	map00040 Pentose and glucuronate interconversions; map00053 Ascorbate and aldarate metabolism; map00330 Arginine and proline metabolism; map01100 Metabolic pathways		3.59092e+07	3.96135e+07	2.93131e+07	3.28037e+07	2.90686e+07	3.73886e+07	2.95847e+07	3.73703e+07	2.66194e+07
C4H4O5	Oxaloacetate; Oxalacetic acid; Oxaloacetic acid; 2-Oxobutanedioic acid; 2-Oxosuccinic acid; keto-Oxaloacetate;	map00010 Glycolysis / Gluconeogenesis; map00020 Citrate cycle (TCA cycle); map00250 Alanine, aspartate and glutamate metabolism; map00362 Benzoate degradation; map00620 Pyruvate metabolism; map00630 Glyoxylate and dicarboxylate metabolism; map00680 Methane metabolism; map00710 Carbon fixation in photosynthetic organisms; map00720 Carbon fixation pathways in prokaryotes; map01060 Biosynthesis of p…		885774	990953	743336	810733	748492	954743	739924	927819	681280
C8H10O4	Penicillic acid; 3-Methoxy-5-methyl-4-oxo-2,5-hexadienoic acid;	NULL		71452.1	60964.4	55019.1	48316.5	36682.7	52079.1	41293.6	44896.3	54587.6
C6H6O8	3-Oxalomalate; 3-Oxalomalic acid;	map00630 Glyoxylate and dicarboxylate metabolism		144684	148770	115109	126843	119749	121407	125741	138859	115184
C4H8N4O4	Allantoate; Allantoic acid;	map00230 Purine metabolism; map01100 Metabolic pathways; map01120 Microbial metabolism in diverse environments		63871	68369.9	64111.1	54749.8	43980.4	51058.4	45478.8	62420.9	47530.9
C5H7N3O4	Azaserine;	NULL		1.62474e+06	1.74496e+06	1.26707e+06	1.38438e+06	1.26515e+06	1.35761e+06	1.29522e+06	1.55921e+06	1.18294e+06
C6H8O7	2,5-Didehydro-D-gluconate; 2,5-Diketogluconic acid;	NULL		3.55201e+06	4.11402e+06	3.18701e+06	2.91419e+06	2.54485e+06	3.07913e+06	2.61742e+06	3.39686e+06	2.58794e+06
C14H9Cl2N3S	CGH 2466;	NULL		101276	104284	77849.3	93372.9	81211.4	89975.5	89653	96382.1	79921.2
C2H7O11P3	Glycolaldehyde triphosphate;	NULL		409783	429015	386133	392943	373399	420163	382927	420262	373156
C12H12BrN3OS	Thiadiazolidinone; 5-(4-Bromophenylimino)-3,4-tetramethylene-1,3,4-thiadiazolidin-2-one;	NULL		133107	131532	94071	117783	91414.4	101018	123392	114474	101879
C5H13O13P3	Deoxyribose triphosphate;	NULL		78343.6	72482.1	59930	72304.6	60118.2	64135.2	75390.7	68291.9	65039.7
C17H11ClF4N2S	Quazepam;	NULL		3.43212e+06	3.66011e+06	2.92625e+06	3.23419e+06	2.82605e+06	3.54603e+06	2.96061e+06	3.59234e+06	2.72781e+06
C15H16N2O6S2	Ticarcillin;	NULL		1.06184e+06	1.03944e+06	859683	1.08201e+06	918836	994917	1.03577e+06	1.11227e+06	868975
C14H8Cl3F3N2O	Fluopicolide;	NULL		232811	216373	187735	221719	200263	209551	219453	221199	201279
C16H8Cl2F6N2O3	Hexaflumuron;	NULL		421604	439542	327280	372468	324101	360064	344194	426255	309313
C18H9NNa2O8S2	Quinoline yellow WS; C.I. Acid yellow 3;	NULL		1.02597e+06	958852	849497	957343	853839	924827	932298	966882	910106
C16H24N2O17P2	dTDP-D-glucuronate;	map00523 Polyketide sugar unit biosynthesis; map01130 Biosynthesis of antibiotics		2.81015e+06	2.85751e+06	2.03601e+06	2.44929e+06	2.19394e+06	2.61909e+06	2.27558e+06	2.78251e+06	1.87846e+06
C6H14O3	1,2,6-Hexanetriol;	NULL		13314.7	13428.7	12833.5	12532.9	9472.33	12497.8	10639.9	11836.7	11858.7
ClH3NO	Hydroxylamine hydrochloride;	NULL		6351.37	6390.25	4442.96	5623.39	4416.94	5762.34	4598.17	6163.46	4423.2
C18H16N6Na2O8S3	Cefonicid sodium;	NULL		219168	243222	157150	189933	172517	206187	177746	220466	129761
C8H11NO2	Dopamine; 4-(2-Aminoethyl)-1,2-benzenediol; 4-(2-Aminoethyl)benzene-1,2-diol; 3,4-Dihydroxyphenethylamine; 2-(3,4-Dihydroxyphenyl)ethylamine;	map00350 Tyrosine metabolism; map00950 Isoquinoline alkaloid biosynthesis; map00965 Betalain biosynthesis; map01060 Biosynthesis of plant secondary metabolites; map01063 Biosynthesis of alkaloids derived from shikimate pathway; map01100 Metabolic pathways; map01110 Biosynthesis of secondary metabolites; map04024 cAMP signaling pathway; map04080 Neuroactive ligand-receptor interaction; map04540 Ga…		1900.64	20511.5	643.94	1392.53	7126.2	8256.92	1423.71	1159.51	1726.99
C4H10O2S2	Dithiothreitol; 1,4-Dithiothreitol; threo-1,4-Dimercapto-2,3-butanediol; DL-threo-1,4-Dimercapto-2,3-butanediol;	NULL		2552.67	2976.46	3377.94	2978.75	2857.12	2475.11	2778.14	2624.11	2454.52
C19H20O10	Khellol glucoside; Khelloside;	NULL		2673.15	2728.69	1873.95	8179.75	46499	86069.2	14168.8	9012.92	28605.6
C13H20O2	4-Heptyloxyphenol; p-n-Heptyloxyphenol;	NULL		436.71	686.844	988.663	476.564	3680.24	19483.2	244.892	581.444	952.989
C6H10O2S4	Dixanthogen; EXD;	NULL		25453.3	31145.8	39486.2	25415.2	27701	30628.5	28536.7	27927.9	32472.8
C12H20N4O7	Zanamivir;	NULL		29976.3	13504	32038.4	31047.8	31731.5	26657.2	28576.6	11613	15766
C14H17ClNO4PS2	Dialifor;	NULL		82677.1	65627.7	56469	100073	46254.8	43156.9	93851.7	83187.9	69897.4
C21H20O8	Flavonol 3-O-D-galactoside;	NULL		187.929	144.832	128.087	3936.18	30278.8	55755.5	3277.64	6315.53	19519.5
C5H4N4O3	Urate; Uric acid;	map00230 Purine metabolism; map01100 Metabolic pathways; map01120 Microbial metabolism in diverse environments; map04976 Bile secretion		13247.4	3513.87	13720.8	13931.1	1898.21	2038.54	26840	9012.43	10286.6
C11H21NO9S2	Glucocochlearin; 1-Methylpropyl glucosinolate;	map00966 Glucosinolate biosynthesis; map01110 Biosynthesis of secondary metabolites; map01210 2-Oxocarboxylic acid metabolism		26568.2	19044.5	16289.4	34826.4	40961.1	33293.3	40020.3	38997.6	48339.5
C14H13NO7	Narciclasine;	NULL		50366.7	36048.4	30101	63888.3	47627.6	39797.7	62744.5	58753.5	44951.1
C21H18NO4+	Nitidine;	NULL		25176.9	21604	28547.9	31754.7	22766.9	22829	28159.5	29424.9	22479.8
C15H11ClF3NO4	Haloxyfop; (RS)-2-[4-(3-Chloro-5-trifluoromethyl-2-pyridyloxy)phenoxy]propionic acid;	NULL		35975.7	31603.5	30139	37163.7	52502	44760.1	38538.8	41818.4	58294.4
C6H11NO2S	S-Allyl-L-cysteine;	NULL		25266.7	21557.8	17336.4	31987.1	23665.4	22648.5	28910.7	26877.6	26233.7
C16H15Cl3O2	Methoxychlor;	NULL		23505.8	24155.7	31515.7	31829.4	33826.3	38337.5	32138.1	37542.2	39928.5
C29H36O15	Methyl hesperidin;	NULL		22861.3	31319.6	37169.3	67201	66902.8	34555.1	68221.5	33460.3	51447.5
C5H9NO4	O-Acetyl-L-serine; O3-Acetyl-L-serine;	map00270 Cysteine and methionine metabolism; map00908 Zeatin biosynthesis; map00920 Sulfur metabolism; map00999 Biosynthesis of secondary metabolites - unclassified; map01100 Metabolic pathways; map01110 Biosynthesis of secondary metabolites; map01120 Microbial metabolism in diverse environments; map01130 Biosynthesis of antibiotics; map01200 Carbon metabolism; map01230 Biosynthesis of amino acid…		3.91455e+06	3.01755e+06	2.78391e+06	5.70069e+06	3.57266e+06	3.40584e+06	6.212e+06	4.82258e+06	4.2496e+06
C5H12O5	Ribitol; Adonitol;	map00040 Pentose and glucuronate interconversions; map00740 Riboflavin metabolism; map01100 Metabolic pathways		31818.6	54603.2	351449	32044	39121.5	111187	30148.3	169348	276212
C11H13NO4	Bendiocarb; 2,2-Dimethyl-1,3-benzodioxol-4-ol methylcarbamate;	NULL		1039.09	2963.04	7359.77	3648.61	7082.38	75202.3	1592.03	4534.96	5905.84
C5H11NO3Se	Selenomethionine Se-oxide;	NULL		325990	292487	266491	348560	301184	307951	342606	320105	318559
C7H6Cl2O4	3,5-Dichloro-2-methylmuconolactone;	map00623 Toluene degradation; map01120 Microbial metabolism in diverse environments		53397.9	53947.3	51936.7	64584	51539.4	52508.1	61343.5	62596.6	58907.2
C17H17NO6	Maculosine;	NULL		236896	172230	232196	249792	165866	153820	205739	257714	185284
C17H12O7	Aflatoxin M1;	map00980 Metabolism of xenobiotics by cytochrome P450		42965.3	20110.4	24890.9	63487.6	66699	48986	63943.3	57648.1	87246.7
C13H23NO9	Streptobiosamine;	NULL		54747.4	27256.4	53843.3	100896	61161.2	65985.8	86711.1	78751.9	72176.5
C14H13N5O5S2	Cefdinir;	NULL		109244	54012.5	42945.8	168041	103518	94067.7	239168	91909.4	124945
C9H7Cl2NO3	N-(3,4-Dichlorophenyl)-malonamate;	NULL		89942.2	62271.4	63302.5	116038	63707	49603.8	120590	92358.9	89200.6
C9H10Cl2N2O2	Linuron;	NULL		67995.9	51698.8	52719.8	86589.7	54941.9	48078.6	88282.4	71729.1	78095.4
C13H12N4O4S	N-Sulfonyloxy-PhIP;	map05204 Chemical carcinogenesis		25943.5	15840.3	17155.5	43364.7	16621.1	14093.2	50800.9	29299.9	28767.2
C9H9N3OS	Benzthiazuron;	NULL		13571.8	13198.2	10837.2	18509.5	12728.6	11104.9	16804.3	16392.4	13309.3
C9H8Cl3NO2S	Captan;	NULL		180323	206894	184328	181097	169316	192125	184521	172987	176373
C10H13N3O5S	Nifurtimox;	NULL		16996.5	12633.5	12011.2	23837	8065.83	10113	12833.5	17375.4	15423.9
C8H12NO6P	Pyridoxine phosphate; Pyridoxine 5-phosphate; Pyridoxine 5'-phosphate; Pyridoxol 5'-phosphate;	map00750 Vitamin B6 metabolism; map01100 Metabolic pathways		23380.8	22874.9	21266.9	31730.1	17766.1	21864.6	22304.2	28889.3	25815.6
C8H19O3PS3	Oxydisulfoton;	NULL		18985.5	8837.76	10139.9	31745.4	15681.2	17829	35866.2	21164.2	23325.8
C18H10O5	Kinobscurinone; 4,9-Dihydroxy-2-methyl-11H-benzo[b]fluorene-5,10,11-trione;	map01057 Biosynthesis of type II polyketide products; map01130 Biosynthesis of antibiotics		9766.73	8317.79	13656.2	14516.4	22375.8	29720.4	15377.6	16299.6	27426.6
C5H11NOS	4-Methylthiobutanaldoxime; (E)-4-(Methylthio)-butanaldoxime;	map00966 Glucosinolate biosynthesis; map01110 Biosynthesis of secondary metabolites; map01210 2-Oxocarboxylic acid metabolism		27865.3	18397.2	17406.3	36176.4	88909	175694	36238.1	38000.9	42148.7
C10H13NO3	2-Phenyl-1,3-propanediol monocarbamate;	map00982 Drug metabolism - cytochrome P450		1954.61	4337.89	7723.28	6045.82	7566.75	50096.4	3549.24	7436.07	9443.71
C6H5Hg+	Arylmercury;	NULL		13162.3	15715.4	12771.1	18688.6	8897.15	10860.8	15912.8	17601.7	11067.4
C14H8N2O4	Phenazine-1,6-dicarboxylic acid; Phenazine-1,6-dicarboxylate;	map00405 Phenazine biosynthesis; map01130 Biosynthesis of antibiotics		7869.96	4466.18	6913.37	16757.3	10324.5	7400.47	9945.54	13597	20672.1
C11H19N3O6	Tabtoxin; beta-Tabtoxin;	map00261 Monobactam biosynthesis; map01130 Biosynthesis of antibiotics		22164.9	24329.8	37683.3	107133	181715	105829	129441	100928	16361
C10H18N4O5	N2-Succinyl-L-arginine; (2S)-2-(3-Carboxypropanoylamino)-5-(diaminomethylideneamino)pentanoic acid;	map00330 Arginine and proline metabolism; map01100 Metabolic pathways		2820.82	15709.7	25302.2	5082.13	3357.7	3998.26	3789.44	4775.72	16782.2
C10H7Cl2NO2	N-(3,5-Dichlorophenyl)succinimide; NDPS;	NULL		17246.2	9120.1	11447.9	14580.9	4262.28	7293.76	12053.1	14742.9	10707.2
C4H6N4O3	(S)-Allantoin; (S)(+)-Allantoin;	map00230 Purine metabolism; map01100 Metabolic pathways; map01120 Microbial metabolism in diverse environments		45357.4	37041.5	36548	39233.6	21714.4	24947.1	34487.4	38439.5	25881.6
C6H6O5S	3-Sulfocatechol; 2,3-Dihydroxybenzenesulfonate;	map00362 Benzoate degradation; map01120 Microbial metabolism in diverse environments		2808.58	1559.3	1646.11	2172.3	8209.73	28560.5	2242.54	8639.2	111679
C9H14N3O8P	3'-CMP; Cytidine 3'-phosphate;	map00240 Pyrimidine metabolism		49225.5	25724.8	31648.6	59562.9	34044.9	39906.3	42822.4	53095	45614.4
C13H8N2O2	Phenazine-1-carboxylate;	map00405 Phenazine biosynthesis; map01130 Biosynthesis of antibiotics		2471.27	2212.89	2183.71	2469.11	3663.37	8901.04	2287.36	5064.86	32670.5
C11H22NO7PS	Coenzyme B; N-(7-Mercaptoheptanoyl)threonine 3-O-phosphate; N-(7-Mercaptoheptanoyl)threonine O3-phosphate; HTP; CoB;	map00680 Methane metabolism; map01100 Metabolic pathways; map01120 Microbial metabolism in diverse environments; map01200 Carbon metabolism		55222.6	44857.1	52704.1	68667.5	60003	66256.2	57528.5	58171.7	77159.8
C6H9NO2	(S)-2,3,4,5-Tetrahydropyridine-2-carboxylate; Delta1-Piperideine-6-L-carboxylate;	map00310 Lysine degradation; map00960 Tropane, piperidine and pyridine alkaloid biosynthesis; map01060 Biosynthesis of plant secondary metabolites; map01064 Biosynthesis of alkaloids derived from ornithine, lysine and nicotinic acid; map01100 Metabolic pathways; map01110 Biosynthesis of secondary metabolites		67575.2	74723.7	75416.3	62146	73904	114734	62597.7	76237.8	66753.7
CoH14O11S	Cobalt sulfate; Cobalt(II) sulfate;	NULL		166702	159285	147825	147575	86426.4	92902.8	142706	126261	128047
C16H32O2	Hexadecanoic acid; Hexadecanoate; Hexadecylic acid; Palmitic acid; Palmitate; Cetylic acid;	map00061 Fatty acid biosynthesis; map00062 Fatty acid elongation; map00071 Fatty acid degradation; map00073 Cutin, suberine and wax biosynthesis; map01040 Biosynthesis of unsaturated fatty acids; map01060 Biosynthesis of plant secondary metabolites; map01100 Metabolic pathways; map01212 Fatty acid metabolism		9.11654e+06	9.39926e+06	8.63334e+06	9.18099e+06	9.11089e+06	8.72349e+06	9.36836e+06	9.31895e+06	9.01343e+06
C22H16N4O	Sudan III; C.I. Solvent Red 23;	NULL		71427.5	65259.9	57507.9	69433.1	65524.1	61491.4	68073.5	72781.6	69166.7
C21H24O5	Rutamarin;	NULL		7.77889e+06	7.44639e+06	7.2235e+06	7.42742e+06	7.1472e+06	7.12093e+06	7.53599e+06	7.58063e+06	7.4288e+06
C21H23ClFNO2	Haloperidol;	NULL		369847	348230	330051	356272	344566	324940	355385	349655	352699
C21H27ClN2O3	Compound II(R/S); 5-(7-(6-Chloro-4-(5-hydro-4-methyl-2-oxazolyl)phenoxy)heptyl)-3-methylisoxazole;	NULL		485895	456829	444003	466107	439374	438765	469489	475474	464080
C23H32O3	Estradiol valerate;	NULL		2.69986e+06	2.60357e+06	2.57379e+06	2.65587e+06	2.56534e+06	2.5002e+06	2.64172e+06	2.64564e+06	2.57267e+06
C23H34O3	16-Butyl-3-methoxy-estra-1,3,5(10)-triene-16beta,17beta-diol;	NULL		33218.1	25822.8	33315	31565	30967.8	22464.2	29168.9	30512.1	30166.6
C20H18O6	Licoisoflavone A; 2',4',5,7-Tetrahydroxy-3'-(3,3-dimethylallyl)isoflavone;	NULL		32775.3	30594.3	28288.1	31173.4	30687.8	30090.9	34215.2	31110.4	29989.6
C23H18N2O5	Saphenamycin;	NULL		32117.3	27611.7	26255	28459.5	28165	28612.1	29558.9	30519.8	30074.4
C23H37NO5	Cammaconine; Columbiananine;	NULL		22541.4	27919.9	26225.2	24181.2	23169.6	22078.1	23312.5	25939.3	24597.4
C24H30O6	Eplerenone;	NULL		950157	940414	897371	929282	911764	901539	959228	942720	939589
C28H54O2	Decyl oleate;	NULL		141508	134547	130543	141896	137687	133177	140893	141937	138249
C21H36O10	Atractyloside A;	NULL		505308	476860	489599	473175	476070	451458	496269	493752	466694
C25H36O4	Ophiobolin A;	NULL		594015	634575	608255	588291	671975	508832	568099	694319	523172
C22H31NO6	Icacine;	NULL		366220	350409	357104	347168	336407	331243	361499	368800	348940
C24H31FO5	Fluorometholone 17-acetate; 9-Fluoro-11beta,17-dihydroxy-6alpha-methylpregna-1,4-diene-3,20-dione 17-acetate; 6alpha-Methyl-9alpha-fluoro-17-acetoxy-21-deoxyprednisolone;	NULL		198089	181011	193979	193841	237446	201479	193489	191970	182313
C25H34O7	Glycinoeclepin A;	NULL		25130	21824.9	24626.1	25841.9	26133.4	23836.9	26970.7	25709.3	28450.8
C28H54O8	13-beta-D-Glucosyloxydocosanoate;	NULL		603524	718021	683066	578633	617776	934032	543045	581214	577689
C26H53NO7P+	1-Oleoylglycerophosphocholine; 1-Oleoyl-sn-glycero-3-phosphocholine;	NULL		1.19845e+06	1.39248e+06	1.28674e+06	1.19923e+06	1.28136e+06	1.70768e+06	1.18844e+06	1.17897e+06	1.15414e+06
C40H50O2	Rhodoxanthin;	NULL		20632.1	21537.5	17156.3	20343.6	18900.7	21778.6	22184	19179.1	20213.8
C27H31NO10	13-Dihydrodaunorubicin;	map01057 Biosynthesis of type II polyketide products; map01130 Biosynthesis of antibiotics		190906	167666	174759	175138	157335	137770	169167	150681	170302
C27H32O15	Isobutrin;	NULL		535141	532199	529523	500109	502863	498984	519577	522000	488757
C41H58O2	Spheroidenone; Spheroiden-2-one;	map00906 Carotenoid biosynthesis; map01100 Metabolic pathways; map01110 Biosynthesis of secondary metabolites		351284	364845	354040	335867	334336	338620	336974	363679	337198
C29H30O15	8-Demethyl-8-(2-O-methyl-alpha-L-rhamnosyl)tetracenomycin C;	map01057 Biosynthesis of type II polyketide products; map01130 Biosynthesis of antibiotics		168803	187844	202696	155769	154030	159766	154966	168002	155757
C37H56N8O9	Nostocyclopeptide A1;	NULL		69290.8	74680	71405.7	67074.2	75272.4	72186.4	73253.3	74824.4	63581.5
C42H66O14	Spinasaponin A;	NULL		461382	487528	473247	518871	476450	454015	498188	501101	461267
C42H65NO16	Monoammonium glycyrrhizinate;	NULL		15177.8	16448.2	14009	13700.7	21197.4	18005.3	15880.7	18349.3	17179.7
C46H54N4O10	Catharine;	NULL		306583	325723	298037	355978	327962	307422	321839	324821	318512
C42H64O19	Thevetin A; Cannogenin 3-O-gentiobiosylthevetoside;	NULL		161180	166055	167084	177563	183825	171879	177463	167497	151074
C46H60N4O13S	Vinblastine sulfate;	NULL		104256	99062.7	101004	111826	111480	106124	110744	110486	107648
C6H6Cl2O2	2,5-Dichloro-2,5-cyclohexadiene-1,4-diol; 1,4-Dihydroxyl-2,5-dichloro-2,5-cyclohexadiene;	map00361 Chlorocyclohexane and chlorobenzene degradation; map01100 Metabolic pathways; map01120 Microbial metabolism in diverse environments		17622.6	16410.6	14637.7	17980.1	16830.7	16061.4	16054.9	17184.6	16015.7
C9H7N3S	Tricyclazole;	NULL		33669.7	31484.9	28557.6	33002.2	34482.8	31663.6	34962.9	35036.8	32393.7
C10H22N4	Guanethidine;	NULL		16887.7	15667.7	15621	17481.3	16084	14775.4	17272.9	15175.2	15827.8
C15H22O2	Dehydrocurdione;	NULL		35057	35326.9	33560.5	32099.6	31891.3	30201.9	33185.8	32487.7	31830.2
C20H22O4	Pulverochromenol;	NULL		78708.6	78024.1	76393.3	81564.1	76739	75236.3	78949.3	78896.2	75843.1
C18H30O3	17-Hydroxylinolenic acid; (9Z,12Z,15Z)-17-Hydroxyoctadecatri-9,12,15-enoic acid;	map00592 alpha-Linolenic acid metabolism		11075.9	16066.9	13820	11638.2	12132.3	18174.9	10748	12106.2	20937.9
C19H24NO3+	Magnocurarine;	NULL		254693	238692	236116	261926	259597	257521	265208	255706	243153
C12H25N3O7	Paromamine; Neomycin D;	map00524 Neomycin, kanamycin and gentamicin biosynthesis; map01130 Biosynthesis of antibiotics		1.57882e+06	1.47134e+06	1.39334e+06	1.5556e+06	1.49858e+06	1.43158e+06	1.54182e+06	1.52615e+06	1.51609e+06
C22H31NO	Tolterodine;	NULL		418153	397115	387475	408688	403604	390568	415257	407577	397055
C22H27NO4	Thalicsessine; 21-(2-Hydroxyethyl)-6,21-secohetisan-6,11,19-trione;	NULL		919597	867571	832440	902084	873498	835206	891430	863032	871363
C25H30O4	Kazinol A;	NULL		7.13972e+06	6.79353e+06	6.46539e+06	6.89269e+06	6.81409e+06	6.50612e+06	6.9255e+06	6.98133e+06	6.71229e+06
C25H24F6N4	Hydramethylnon; Amdro;	NULL		76196.8	78438.3	73542.7	78072.6	72565.7	78829	76209.5	70675.8	84803.4
C24H28ClN2O5	Benazepril hydrochloride;	NULL		50926.4	41647	44894.1	47990.1	39973.5	46915	49778.9	46367.2	51725.4
C28H47NO4S	Tiamulin;	NULL		84583	85422.3	81688.6	83556.2	82800.3	92126.3	81415.6	79235.9	77985.2
C40H54O	Echinenone; beta,beta-Caroten-4-one;	map00906 Carotenoid biosynthesis; map01110 Biosynthesis of secondary metabolites		261930	263001	257328	263193	253249	263693	261475	250943	245256
C40H54O4	4-Ketomyxol;	NULL		163189	180721	171984	158287	167852	215159	158747	158303	155242
C44H66O16	Acetylgitaloxin; alpha-Acetylgitaloxin;	NULL		183625	203465	186394	195438	194364	176932	190206	184418	196458
C18H37NO	Octadecanamide; Stearamide; Stearic acid amide;	NULL		2.17214e+06	3.44595e+06	3.02768e+06	2.6607e+06	1.53429e+06	1.87754e+06	1.6431e+06	1.8167e+06	1.48293e+06
C17H32O2	omega-Cyclohexylundecanoic acid; Cyclohexaneundecanoic acid;	NULL		309510	284457	292265	290447	267278	283859	288789	295424	282404
C18H28N2O2	RU 5135;	NULL		116835	119345	128340	124111	112125	104910	114935	119809	104465
C21H26NO3+	Mepenzolate;	NULL		1.3785e+06	1.33273e+06	1.28836e+06	1.32509e+06	1.28415e+06	1.26474e+06	1.35694e+06	1.33162e+06	1.32427e+06
C20H26O6	Enmein;	NULL		6.39188e+06	6.15011e+06	6.19528e+06	6.10172e+06	5.95609e+06	5.97567e+06	6.22003e+06	6.35077e+06	6.17711e+06
C23H44O5	1,2-Didecanoylglycerol; 1,2-Didecanoyl-sn-glycerol;	NULL		268675	254608	245287	259779	251875	245395	256119	257354	248717
C22H30N6O4S	Sildenafil;	NULL		3.22041e+06	3.13279e+06	3.19571e+06	3.25899e+06	3.17957e+06	3.11529e+06	3.25073e+06	3.28999e+06	3.13464e+06
C21H26N2O4	Aspidodasycarpine;	NULL		421295	403107	406208	398602	389056	394510	414857	404040	393403
C35H36N2O6	Daphnoline;	NULL		97726.7	98298.1	95881.4	103830	98720.5	93234.6	103732	105211	97077.6
C19H32	5alpha-Androstane;	NULL		157255	148227	151094	156298	162120	147889	158218	164996	154978
C24H34O	3-(2,4-Cyclopentadien-1-ylidene)-5alpha-androstan-17beta-ol;	NULL		22554.1	20232.1	23064.8	23191.7	21142.7	20605.7	20362.2	21114.8	21246.2
C22H25NO3	Tamibarotene; Am 80;	NULL		50422.7	49735.2	52750.6	50548	48350.6	49582.7	51709.1	54452.8	49082
C27H48O6	Scymnol; 5beta-Scymnol; 5beta-Cholestane-3alpha,7alpha,12alpha,24,26,27-hexol;	NULL		284663	264708	260333	261322	254440	261803	275094	282207	266575
C31H42O10	Asclepin;	NULL		291069	257894	252498	266584	243426	214228	263993	225458	256196
C36H36FeN4O8	Fe-coproporphyrin III; Coproheme III;	map00860 Porphyrin and chlorophyll metabolism; map01100 Metabolic pathways; map01110 Biosynthesis of secondary metabolites		97208.3	88266	90219.4	86092.8	86355	81552.3	91373.8	91666.5	83438
C40H54O3	Adonixanthin; 4-Ketozeaxanthin; 3,3'-Dihydroxy-beta,beta-carotene-4-one;	map00906 Carotenoid biosynthesis; map01110 Biosynthesis of secondary metabolites		902317	893621	860965	858139	850532	860563	860093	911351	877965
C41H60O	3,4-Dihydroanhydrorhodovibrin;	map00906 Carotenoid biosynthesis; map01100 Metabolic pathways		414387	475364	341818	433495	385320	389372	405824	430235	364140
C18H22O4	Arnebinone;	NULL		3.94734e+06	3.74851e+06	3.71047e+06	3.77039e+06	3.62148e+06	3.62876e+06	3.83374e+06	3.85252e+06	3.74091e+06
C23H35N3O5	N-Formyl-norleucyl-leucyl-phenylalanyl-methylester; f-NLP-ME;	NULL		19258.8	18830.8	15801.5	20347.2	15922.5	18932.8	17053.5	20839	16921.4
C41H64O13	Digitoxin;	NULL		189183	160470	156261	203990	184992	165531	183977	207830	165188
C42H64O19	k-Strophanthoside; Strophanthidin 3-diglucosylcymarose;	NULL		23283.1	33076.5	26967.7	30713.7	28509.5	23591.2	28993.2	28341.4	24318.2
C21H24N2O4	Dialdehyde;	map00901 Indole alkaloid biosynthesis		20529.8	17288.7	13971.5	21402.1	18637.1	16408	20658.1	22182.9	17708.9
C42H56O4	2,2'-Diketospirilloxanthin; 2,2'-Dioxospirilloxanthin;	map00906 Carotenoid biosynthesis; map01100 Metabolic pathways		13421.6	10677	9214.84	15306.2	14557.9	12182.6	13911	14404.1	13359
C10H16O	(+)-Camphor; d-Camphor;	map00902 Monoterpenoid biosynthesis; map01110 Biosynthesis of secondary metabolites; map04750 Inflammatory mediator regulation of TRP channels		6744.87	6513.39	5057.3	6170.41	4579.63	4775.9	6567.58	6838.14	5571.03
C17H28O	Heptadecatrienal; (8Z,11Z,14Z)-8,11,14-Heptadecatrienal;	map00592 alpha-Linolenic acid metabolism		30120.9	26262.4	27337.8	27180.5	27079.9	26483.1	28591.5	28206.9	27643.3
C18H30	Estrane; 19-Norandrostane;	NULL		80361.4	65245.9	42249.9	99332.2	76409.4	62600.4	78491.8	107179	69836.2
C19H32O2	5alpha-Androstane-11beta,17beta-diol;	NULL		97682.3	139124	117339	115386	68721.6	76670.2	80961.8	72784.2	66453.2
C21H32O2	20alpha-Hydroxy-4-pregnen-3-one; 20alpha-Hydroxypregn-4-en-3-one; 20alpha-Hydroxyprogesterone; (S)-20-Hydroxypregn-4-en-3-one;	map00140 Steroid hormone biosynthesis		144768	132851	130339	141684	141110	136713	140263	140286	136274
C21H32N2O	Stanozolol; Androstanazole;	NULL		1.7983e+06	1.55208e+06	1.14424e+06	1.99442e+06	1.72752e+06	1.38593e+06	1.79539e+06	2.12119e+06	1.60741e+06
C24H32O4	Megestrol acetate;	NULL		119844	112615	107108	118652	112340	108466	116329	135933	108934
C21H28N2O5	Trimethobenzamide;	NULL		109828	96351	88376.1	106369	103276	93139.6	107829	112123	101364
C22H25N3O5	12alpha,13alpha-Dihydroxyfumitremorgin C; 12,13-Dihydroxyfumitremorgin C;	map00404 Staurosporine biosynthesis; map01130 Biosynthesis of antibiotics		1.61567e+06	1.51072e+06	1.45339e+06	1.57123e+06	1.49996e+06	1.44131e+06	1.57852e+06	1.65925e+06	1.55052e+06
C21H32N4O6	HC-toxin;	NULL		973943	915260	895480	967620	925799	883840	953653	997357	922268
C23H32N4O4	Nummularine F;	NULL		289596	283394	281919	292329	280966	267792	293471	291889	284062
C18H35N3O12	Kanamycin X;	map00524 Neomycin, kanamycin and gentamicin biosynthesis; map01130 Biosynthesis of antibiotics		318356	306586	297533	314810	293857	292419	308607	326332	307454
C24H32N2O6	Dimetacrine tartrate; Dimetacrine bitartrate;	NULL		234256	218643	209595	238915	222813	210031	225914	247904	220219
C24H34O9	T-2 Toxin;	NULL		126179	122816	122409	131698	122397	117732	130831	136758	122653
C31H32N4O3	PD 123319;	map07229 Angiotensin receptor and endothelin receptor antagonists		104857	96774.4	97011.4	109653	100449	92271.9	106994	108740	102537
C29H40O10	Archangelolide;	NULL		415986	416263	539090	659485	507003	462946	508354	513286	409484
C40H54O2	3-Hydroxyechinenone;	map00906 Carotenoid biosynthesis; map01110 Biosynthesis of secondary metabolites		154055	166652	172050	160251	148878	161628	147125	176776	153466
C40H68O7P2	all-trans-Octaprenyl diphosphate; Farnesylfarnesylgeraniol;	map00130 Ubiquinone and other terpenoid-quinone biosynthesis; map00900 Terpenoid backbone biosynthesis; map01110 Biosynthesis of secondary metabolites		42590.2	50177.1	39203.3	54811.6	51134.7	41942.4	51718.7	47372	42340
C19H34O2	Sterculic acid;	map01060 Biosynthesis of plant secondary metabolites		43765	43993.4	41577.6	44033.5	44543.4	42441.3	45471.2	45395.1	43589.7
C18H34O2	(9Z)-Octadecenoic acid; (Z)-Octadec-9-enoic acid; Oleate; Oleic acid;	map00061 Fatty acid biosynthesis; map00073 Cutin, suberine and wax biosynthesis; map01040 Biosynthesis of unsaturated fatty acids; map01060 Biosynthesis of plant secondary metabolites; map04212 Longevity regulating pathway - worm		266730	244348	245717	248422	243276	238064	253348	264014	249808
C28H29F2N3O	Pimozide;	NULL		90425.4	88823	90232.1	94045	90000.8	92058.5	92371.6	93140.6	89074.8
C42H58N2O	Staphidine;	NULL		295631	274401	281896	295579	263860	265953	308863	324672	276337
C29H44O2	alpha-Tocotrienol;	map00130 Ubiquinone and other terpenoid-quinone biosynthesis; map01110 Biosynthesis of secondary metabolites		37816.1	39823.1	40113.6	39136.8	37861.9	37930.4	40041.3	38754.2	37064.9
C18H36O	Octadecanal;	NULL		25528.1	24898.6	27850.6	22646	21950.4	22215.6	23025.9	26052.7	21186.4
C23H39NO	Irehine;	NULL		22118.5	18710.1	20539.5	20161.4	20227.3	18024	20419.8	21458.2	19449.2
C20H38O2	Prostanoic acid;	NULL		413566	395282	388774	397300	379540	381824	405919	406133	395312
C23H33N2O+	Isopropamide;	NULL		165100	166114	154420	157948	154802	153373	162830	164446	153647
C26H38O7	10-Desacetyltaxuyunnanin C;	NULL		139777	132604	141475	135527	126363	124489	127208	139294	141234
C33H61N5O9	Pepsinostreptin; N-Isobutyrylpepstatin; Isobutyryl-Val-Val-Sta-Ala-Sta;	NULL		923637	896024	857202	897045	860794	866366	909443	906825	878130
C24H35NO5	Batrachotoxinin A;	NULL		165964	150920	147861	167355	157365	148156	162149	158145	157831
C22H35NO4	Karakoline; Aconitane-1,8,14-triol, 20-ethyl-16-methoxy-4-methyl-, (1-alpha,14-alpha,16-beta)-;	NULL		267001	241782	252650	263989	244635	237445	259120	272724	249060
C35H54O7	Ilexolide A;	NULL		123746	112697	111363	119487	111461	109388	116202	119417	109896
C20H34O4	11,12-DHET; (5Z,8Z,14Z)-11,12-Dihydroxyeicosa-5,8,14-trienoic acid; (5Z,8Z,14Z)-11,12-Dihydroxyicosa-5,8,14-trienoic acid;	map00590 Arachidonic acid metabolism; map01100 Metabolic pathways; map04726 Serotonergic synapse		84342.1	76929	81565.1	79801.6	78516.7	82471.2	83632.4	83249.1	79244
C22H28O6	Quassin; Nigakilactone D;	NULL		417154	400632	402168	403833	387422	384003	417820	411790	407109
C21H22O9	Barbaloin; Aloin; Aloin A;	NULL		66226	63128.5	60470	64696.9	59845.2	57749.1	65290.7	63171.9	57572.3
C20H31N3O7S	OA-6129 A;	map00332 Carbapenem biosynthesis; map01130 Biosynthesis of antibiotics		227122	220139	227863	221279	209175	206379	221077	217142	219865
C28H42N4O6	Kukoamine D;	NULL		44356.1	44643.4	43343.3	48162.6	45223.3	46819.9	42006.9	44369.8	45229.9
C42H58O3	2-Ketospirilloxanthin; 2-Oxospirilloxanthin;	map00906 Carotenoid biosynthesis; map01100 Metabolic pathways		301091	299759	271856	274332	268556	306607	288410	323364	279354
C28H44O3	Nandrolone decanoate;	NULL		149459	153089	142344	146487	143412	137979	148820	148591	144653
C26H37N5O2	Cabergoline;	NULL		41565.2	40697.1	40420.7	40633.3	41839.7	39784.4	41635.4	43204.9	50391.7
C27H50O6	Tricaprilin; Trioctanoylglycerol;	NULL		226445	226866	227932	230714	211605	223001	231862	223120	207039
C16H32O4	10,16-Dihydroxyhexadecanoic acid; Hexadecanoic acid, 10,16-dihydroxy-;	map00073 Cutin, suberine and wax biosynthesis		100959	301910	1.01106e+06	73915.5	85170.8	142226	78390.6	75708.7	73900.5
C27H44O3	Calcitriol; 1alpha,25-Dihydroxyvitamin D3; (1S,3R,5Z,7E)-9,10-Seco-5,7,10(19)-cholestatriene-1,3,25-triol;	map00100 Steroid biosynthesis; map01100 Metabolic pathways; map04928 Parathyroid hormone synthesis, secretion and action; map04961 Endocrine and other factor-regulated calcium reabsorption; map04978 Mineral absorption; map05152 Tuberculosis		302803	282124	276801	288306	274712	270230	296288	289267	283671
C49H74O4	Ubiquinone-8; Coenzyme Q8;	map00130 Ubiquinone and other terpenoid-quinone biosynthesis; map01110 Biosynthesis of secondary metabolites		107222	101406	100364	104248	101532	96137.3	102773	107389	115708
C17H15N3	Yellow OB; 1-[2-(2-Methylphenyl)diazenyl]-2-naphthalenamine;	NULL		216308	207629	201529	209618	205984	199781	217587	209377	202186
C24H38O4	Bis(2-ethylhexyl)phthalate; Di(2-ethylhexyl)phthalate; Dioctyl phthalate; DEHP;	NULL		1.14168e+07	1.07942e+07	1.05305e+07	1.07736e+07	1.0659e+07	1.03348e+07	1.10202e+07	1.08808e+07	1.10166e+07
C30H32N2O2	Diphenoxylate;	NULL		42161.6	39621.3	39282.3	39586.4	42220.3	39710.9	40404.3	41661.8	45551.3
C40H52O3	Phoenicoxanthin; Adonirubin;	map00906 Carotenoid biosynthesis; map01110 Biosynthesis of secondary metabolites		61234.1	58129.4	60323.8	64178.3	52427.7	53158.6	56422	57246.1	52518.8
C24H42O4	Petromyzonol; 5alpha-Cholan-3alpha,7alpha,12alpha,24-tetrol;	NULL		89180.4	85391.8	81595.7	83782.7	83289.4	81720.7	87488	86422.4	82294
C21H29FO6	9alpha-Fluoro-11beta,16alpha,17alpha,21-tetrahydroxypregn-4-ene-3,20-dione; 9alpha-Fluoro-16alpha-hydroxyhydrocortisone;	NULL		404464	386482	380222	380412	363811	370262	388081	390350	380040
C27H44O7	Ajugasterone C;	NULL		139080	135570	128888	132995	135750	140395	131233	138260	139399
C24H46O4	Lauroyl peroxide; Dilauroyl peroxide;	NULL		95686.7	91422.3	89598.9	93431.1	92607.5	88927.7	96506	95035.4	87518.8
C27H41NO5S	Epothilone D; Desoxyepothilone b;	NULL		156548	156268	164386	146913	138514	153139	154782	155574	156174
C23H27FN4O3	Paliperidone; 9-Hydroxyrisperidone;	NULL		2.42192e+06	2.20457e+06	2.18866e+06	2.31018e+06	2.18506e+06	2.1417e+06	2.35404e+06	2.285e+06	2.23987e+06
C20H27FO3	9-Fluoro-17-methyl-11-oxotestosterone; 9alpha-Fluoro-17beta-hydroxy-17alpha-methylandrost-4-ene-3,11-dione;	NULL		380877	349359	364025	349729	345112	344363	370716	359660	358419
C20H24O4	Crocetin; 8,8'-Diapocarotene-8,8'-dioic acid;	map00999 Biosynthesis of secondary metabolites - unclassified; map01110 Biosynthesis of secondary metabolites		85431.6	77374.5	76887.8	78426.4	88934.4	73706.6	86983.2	102920	83308.7
C6H14O2	2-Butoxyethanol;	NULL		12234.3	12821.9	10673.2	11735.2	12055.4	11743.2	12954.5	12841.6	11844.6
C23H41NO2	Terminaline;	NULL		113247	103031	103036	104436	102858	100922	106864	106785	102206
C20H40O3	L-2-Hydroxyphytanate;	NULL		117019	128495	91695.1	71130.5	61782.4	74916	74595.8	140153	89918.4
C7H6N4S	1-Phenyl-5-mercaptotetrazole; 1-Phenyltetrazole-5-thiol;	NULL		46287.9	46209.6	42688.6	40358.7	43892.6	44599	44645.2	46451.7	45286.6
C30H50O2	Pre-alpha-onocerin; (21S)-21,22-Epoxypolypoda-8(26)-13,17-trien-3beta-ol;	NULL		853486	823820	808571	815050	814700	823146	828138	844665	818168
C20H36O2	Sclareol; (13R)-Labd-14-ene-8alpha,13-diol;	map00904 Diterpenoid biosynthesis; map01110 Biosynthesis of secondary metabolites		31751.6	28206.6	24622.2	27957.5	24355	24649.6	27300.9	28186.6	26174.9
C29H48O	Stigmasterol;	map00100 Steroid biosynthesis; map01060 Biosynthesis of plant secondary metabolites; map01062 Biosynthesis of terpenoids and steroids; map01110 Biosynthesis of secondary metabolites		11660.7	20317	21336.6	11881.1	19683.4	41136.8	14888.3	19280.8	14313.1
C28H48O	Campesterol;	map00100 Steroid biosynthesis; map00905 Brassinosteroid biosynthesis; map01060 Biosynthesis of plant secondary metabolites; map01062 Biosynthesis of terpenoids and steroids; map01070 Biosynthesis of plant hormones; map01100 Metabolic pathways; map01110 Biosynthesis of secondary metabolites		229338	437582	389268	231395	401571	729743	258994	332021	291659
C57H88O8	1,2-Di-(9Z,12Z,15Z-octadecatrienoyl)-3-(8-(2E,4Z-decadienoyloxy)-5,6-octadienoyl)-sn-glycerol;	NULL		45741	44978.5	51908.7	66376.9	47375.2	97961.9	133923	68112.7	43073.1
C22H38O2	13,16,19-Docosatrienoic acid; (13E,16E,19E)-Docosa-13,16,19-trienoic acid;	NULL		80086.4	80276	79975.9	77753.7	73123.9	75536.3	77054	82382.7	80216.5
C30H52O	24,25-Dihydrolanosterol;	map00100 Steroid biosynthesis		43943.5	37536.7	36946.5	38825	37084.9	35038.7	40536.5	39144	38040.6
C18H36O2	Octadecanoic acid; Stearate; Stearic acid;	map00061 Fatty acid biosynthesis; map01040 Biosynthesis of unsaturated fatty acids; map01060 Biosynthesis of plant secondary metabolites; map04745 Phototransduction - fly		1.31309e+07	1.18198e+07	1.1931e+07	1.17856e+07	1.12844e+07	1.16232e+07	1.19849e+07	1.21766e+07	1.24034e+07
C23H28O6	Cortancyl; Prednisone 21-acetate; 21-Acetoxy-17alpha-hydroxypregna-1,4-diene-3,11,20-trione;	NULL		687833	663329	666332	656246	623959	662954	672319	678136	656460
C26H37NO6	Militarinone A;	NULL		105363	96588.9	94545	95237.8	98897.4	96143.8	98997.3	103714	97011.3
C29H31NO2	Nafoxidine;	NULL		174407	165229	149109	150273	143338	150492	159667	165585	166209
C18H36N4O11	3''-Deamino-3''-hydroxykanamycin B; Nebramycin factor 3;	map00524 Neomycin, kanamycin and gentamicin biosynthesis; map01130 Biosynthesis of antibiotics		3.66866e+06	3.51305e+06	3.47378e+06	3.48963e+06	3.38851e+06	3.39456e+06	3.55278e+06	3.61964e+06	3.50008e+06
C27H24N4O3	3'-Demethylstaurosporine; 3'-Demethoxy-3'-hydroxystaurosporine;	map00404 Staurosporine biosynthesis; map01130 Biosynthesis of antibiotics		235766	222063	226980	219616	214888	217587	226368	230173	219056
C31H34O8	Sarothralin;	NULL		416591	399882	417437	395491	371417	383434	395804	403449	392809
C26H34ClNO6	20-O-Methyl-19-chloroproansamitocin;	map01051 Biosynthesis of ansamycins; map01130 Biosynthesis of antibiotics		117538	107482	117205	111990	103541	111436	118179	113087	111400
C29H36O11	Labriformidin;	NULL		166100	157879	163115	153014	149317	160815	164940	165516	163289
C31H29N5O4	Asperlicin;	map07117 Benzodiazepine family		79088.5	77027.5	80024.1	73714.5	71843.3	73919.6	73916.6	81591.9	77405.4
C38H70O4	Coixenolide;	NULL		976807	871772	863513	886940	832732	861877	878585	899830	919332
C24H44O6.[C2H4O]w.[C2H4O]z.[C2H4O]y.[C2H4O]x	Tween 80; Polysorbate 80;	NULL		278135	259247	248895	243329	233458	247205	266172	269666	250231
C35H64O7	Annonacin;	NULL		70406	60858.2	70114.4	66551.1	64644.8	65501.4	64354.1	67322.1	62470.7
C41H64O12	Flaccidin B;	NULL		505343	442764	474021	453765	441246	439094	450366	483472	462830
C42H64O12	Avermectin A2a monosaccharide;	map00522 Biosynthesis of 12-, 14- and 16-membered macrolides		132890	122670	130123	120279	122000	118416	127784	123278	128012
C43H58N4O12	Rifampicin; Rifampin;	map04976 Bile secretion		141001	131041	131952	124981	122554	132085	125127	132461	132909
C40H62N12O9	Alamandine;	map04614 Renin-angiotensin system		302404	294989	287702	281273	258572	275982	282153	274079	286174
C10H12N4O7	Urate-3-ribonucleoside; Uric acid ribonucleoside;	map00230 Purine metabolism		173782	164734	160495	164758	161369	157872	173087	167188	162028
C19H40O3	1-O-Hexadecyl-sn-glycerol; 1-O-Hexadecylglycerol; Chimyl alcohol; Glycerol hexadecyl ether;	NULL		812462	740749	706529	730568	695598	691310	722245	753230	748944
C20H28O4	Gibberellin A14 aldehyde;	map00904 Diterpenoid biosynthesis		3.91854e+06	3.61118e+06	3.60853e+06	3.76764e+06	3.51295e+06	3.3997e+06	3.78417e+06	3.67292e+06	3.62076e+06
C21H27FO4	17,21-Epoxy-9-fluoro-11beta-hydroxypregn-4-ene-3,20-dione; 17,21-Epoxy-9-fluoro-11beta-hydroxyprogesterone;	NULL		1.05973e+06	974898	961438	970917	946381	925888	994965	984984	1.00808e+06
C29H50O	beta-Sitosterol; Sitosterol;	map00100 Steroid biosynthesis; map01060 Biosynthesis of plant secondary metabolites; map01062 Biosynthesis of terpenoids and steroids; map01110 Biosynthesis of secondary metabolites		118239	118057	155540	223051	145042	353374	484182	269382	126064
C20H33NO7	Candoxatrilat;	NULL		1.00095e+06	930034	908439	926067	907950	889618	940518	959672	948903
C23H29NO3	Propiverine;	NULL		291628	264259	265451	273992	265864	255569	283639	272159	271418
C21H38O7	Erythronolide B;	map00522 Biosynthesis of 12-, 14- and 16-membered macrolides; map01130 Biosynthesis of antibiotics		1.90362e+06	1.78572e+06	1.73826e+06	1.78536e+06	1.73934e+06	1.71866e+06	1.80248e+06	1.83944e+06	1.78729e+06
C27H46O5	3alpha,7alpha,12alpha-Trihydroxy-5beta-cholestanoate; 3alpha,7alpha,12alpha-Trihydroxy-5beta-cholestan-26-oate; 3alpha,7alpha,12alpha-Trihydroxy-5beta-cholestanate;	map00120 Primary bile acid biosynthesis; map01100 Metabolic pathways		263411	239512	236188	237798	237813	234472	250886	246756	236717
C21H35N3O8S	OA-6129 E;	NULL		249385	207117	242234	1.18488e+06	2.29851e+06	1.20965e+06	718227	889616	691661
C30H42N4O2	Homaline;	NULL		76530.8	70435.3	68878.3	69855.6	67332.1	66599.1	73041.8	72597.7	71138.8
C28H42Cl2N4O2+2	Ambenonium;	NULL		15565	11777	13447	19936.1	25683.2	19386.6	17763.1	20226	16924.5
C39H61NO14	Rimocidine;	NULL		31700.6	29436.6	28502.1	28008	32397.1	32926.3	25927.5	34657.2	28530.4
C6H6NO6P	4-Nitrophenyl phosphate;	map00627 Aminobenzoate degradation; map01120 Microbial metabolism in diverse environments		21496.7	21868.7	21861.8	24310.5	20973.4	23615	23694.7	23980.7	22185.6
C16H16O4	Deoxyshikonin;	map00130 Ubiquinone and other terpenoid-quinone biosynthesis; map01110 Biosynthesis of secondary metabolites		21290.5	20674.9	18593.1	20157.1	18558	17377	20721.4	19510.8	19942.1
C21H20O6	8-(1,1-DMA)kaempferide; 8-(1,1-Dimethylallyl)kaempferide;	NULL		40954.9	37291.6	38322	37632.4	37030.3	34736.8	39426.2	38653.8	39217.8
C28H36N2O4	Psychotrine;	NULL		368436	342881	374931	366346	337686	345060	356177	349920	335564
C50H70O14	Brevetoxin B;	NULL		104995	101117	100842	97958.2	96096.1	89201.4	96657.9	88351.8	98396.2
C5H11NS3	Thiocyclam; Evisect;	NULL		32487.8	30107.3	29010.6	29693	30392.1	29389.3	30943.6	30867.4	29228.6
C14H20O2	Glutinosone;	NULL		115286	104081	102070	104821	102871	98339.9	106858	106007	107389
C13H16O5	Trinexapac-ethyl;	NULL		39140.1	37382.5	36515.1	38551.5	36380.3	37413.3	40442.7	41301.2	38133.6
C11H16N4O5	Coformycin;	NULL		1.92919e+06	1.83802e+06	1.78208e+06	1.85217e+06	1.81676e+06	1.75442e+06	1.89588e+06	1.8509e+06	1.82042e+06
C22H31FO3	9alpha-Fluoro-11beta-hydroxy-6alpha-methylpregn-4-ene-3,20-dione;	NULL		1.02001e+06	978088	973350	996999	967993	958488	982908	1.00469e+06	975027
C27H44O2	Spirostan;	NULL		387650	355329	355663	364549	358842	361356	383592	372813	361671
C24H40O2	5beta-Cholanic acid; Ursocholanic acid;	NULL		835695	760381	747146	752444	711521	724309	771894	762357	752375
C29H36O4	16alpha,17alpha-Dihydroxyprogesterone acetophenide;	NULL		2.89985e+06	2.23082e+06	3.63428e+06	2.89905e+06	3.24077e+06	2.80461e+06	2.60838e+06	3.42746e+06	3.1458e+06
C20H33N3O8S	OA-6129 D;	NULL		231821	172284	292466	238026	258003	229413	211991	258683	243909
C19H38N6O10	Nebramycin 5'; Nebramycin factor 5'; 6''-O-Carbamoyltobramycin;	map00524 Neomycin, kanamycin and gentamicin biosynthesis; map01130 Biosynthesis of antibiotics		4.27891e+06	4.06695e+06	4.17468e+06	4.22811e+06	4.00148e+06	3.99062e+06	4.20247e+06	4.25386e+06	4.08626e+06
C44H70O9	Mycolactone;	map01052 Type I polyketide structures		541035	506537	497180	513542	494975	484278	532485	510230	508965
C18H37O7P	(9S,10S)-10-Hydroxy-9-(phosphonooxy)octadecanoate;	NULL		660183	625725	630602	612985	593069	603311	636328	633050	626850
C30H48O2	Oleanolic aldehyde;	NULL		9419.09	26283	40521.5	8590.16	114105	156762	9973.3	10983.6	10726.4
C23H28O8	Salvinorin A;	NULL		65117.5	57752	56430.1	57470.7	55686.6	53697.5	59088	60845.7	58279.6
C33H38N4O4	Integerressine;	NULL		2.69955e+06	2.6148e+06	2.85132e+06	2.75458e+06	2.56741e+06	2.61099e+06	2.75532e+06	2.71129e+06	2.54742e+06
C32H44O7	Condurangogenin C;	NULL		143662	132226	134942	133317	126835	126930	136911	135290	129999
C33H38N4O7	Oxidized dinoflagellate luciferin;	NULL		129121	129290	129264	120804	119133	129429	126376	122152	123332
C32H32O14	Chartreusin;	NULL		155576	154089	153256	165568	162400	149013	149419	152395	146934
C28H34O13	Podorhizol beta-D-glucoside;	NULL		895196	903952	944411	866204	862489	871030	906993	878406	887053
C24H47NO7	Psychosine; Galactosylsphingosine; O-Galactosylsphingosine;	map00600 Sphingolipid metabolism		37836.1	36172.2	41132.2	40120.3	39355.6	38708.5	38123.6	35401.3	39321.9
C30H46O4	Glycyrrhetinate; Enoxolone; Glycyrrhetinic acid;	NULL		181617	171692	173599	172276	158631	164127	169592	176619	164343
C28H50O5	6alpha-Hydroxy-castasterone;	map00905 Brassinosteroid biosynthesis; map01100 Metabolic pathways; map01110 Biosynthesis of secondary metabolites		307944	288899	292604	291548	297731	285678	300477	293330	296338
C29H38O9	Uscharidin;	NULL		132669	119994	122773	355026	701097	397525	266700	310343	264959
C23H41O6P	3-(O-Geranylgeranyl)-sn-glycerol 1-phosphate;	map00564 Glycerophospholipid metabolism		923782	856127	849535	2.11363e+06	4.08912e+06	2.39718e+06	1.62063e+06	1.96184e+06	1.6857e+06
C19H36N4O10	6'-Oxogentamicin X2;	map00524 Neomycin, kanamycin and gentamicin biosynthesis; map01130 Biosynthesis of antibiotics		17837.6	16061.9	22321.6	307521	897541	403814	189893	257077	198445
C24H34O11	Iridodial glucoside tetraacetate;	NULL		9933.17	7626.04	6794.09	102667	293171	132742	61848.6	84064.6	68686.4
C20H40O	Phytol;	NULL		19985.6	22537	17015.3	13591.6	13817.6	14425.2	13497.7	20251.8	14124
C24H49NO7	D-Glucosyldihydrosphingosine;	NULL		22357.4	19587.8	24211.8	24199.7	25581.6	20255.1	22264.4	24297.7	18970.8
C11H19NO3	N-Heptanoylhomoserine lactone;	map02024 Quorum sensing		16180.6	14696.1	13146.2	14068.4	13891.6	14252.2	15503.8	14161	15336.8
C28H46O4	3-Dehydroteasterone;	map00905 Brassinosteroid biosynthesis; map01100 Metabolic pathways; map01110 Biosynthesis of secondary metabolites		139233	132425	125676	130676	128356	126038	135830	134347	130615
C15H27NO	4-Keto-2-undecylpyrroline; 4-Keto-2-undecyl-4,5-dihydropyrrole;	map00333 Prodigiosin biosynthesis; map01130 Biosynthesis of antibiotics		35922.3	36336.2	38372.3	37199.2	36082.3	35500.1	42182	37475.7	37451.8
C30H50	Squalene; Spinacene; Supraene;	map00100 Steroid biosynthesis; map00909 Sesquiterpenoid and triterpenoid biosynthesis; map01060 Biosynthesis of plant secondary metabolites; map01062 Biosynthesis of terpenoids and steroids; map01066 Biosynthesis of alkaloids derived from terpenoid and polyketide; map01070 Biosynthesis of plant hormones; map01100 Metabolic pathways; map01110 Biosynthesis of secondary metabolites; map01130 Biosynt…		248022	233485	228538	236437	233704	227120	241679	241075	233258
C41H54O2	Okenone;	map00906 Carotenoid biosynthesis		149694	145773	144751	146017	141230	134720	145269	141209	142365
C26H44O10	L-Olivosyl-oleandolide;	map00522 Biosynthesis of 12-, 14- and 16-membered macrolides; map01130 Biosynthesis of antibiotics		817329	758348	752840	764596	771769	727082	787940	777864	752047
C30H38N4O4	Sativanine B;	NULL		1.32053e+06	1.21764e+06	1.19449e+06	1.26693e+06	1.23085e+06	1.17042e+06	1.27878e+06	1.26614e+06	1.24024e+06
C28H48O3	(22R,23R)-22,23-Dihydroxycampesterol;	map00905 Brassinosteroid biosynthesis		162098	157159	146240	146581	150735	149074	152016	153083	153569
C46H68O6	1'-Hydroxy-gamma-carotene glucoside;	map00906 Carotenoid biosynthesis		103247	92744	96488.3	98353.5	114245	104842	111721	97310.2	105179
C36H65NO12	Erythromycin D;	map00522 Biosynthesis of 12-, 14- and 16-membered macrolides; map01130 Biosynthesis of antibiotics		70315.2	66202.9	67078.9	71067.5	65891.2	66463.2	71867.4	68625.7	71047.1
C19H38O2	Nonadecanoic acid; Nonadecylic acid;	NULL		260720	248816	241316	251503	233253	245131	251148	254385	249189
C28H50O	Campestanol; 5alpha-Campestanol; (24R)-5alpha-Ergostan-3beta-ol;	map00905 Brassinosteroid biosynthesis; map01100 Metabolic pathways; map01110 Biosynthesis of secondary metabolites		149888	145715	144808	142245	154987	153817	149073	144710	144091
C28H50N2O4	Carpaine;	NULL		972065	936364	921764	928957	943438	930073	962152	952907	915553
C21H41N5O8	N2'-Acetylgentamicin C1a;	NULL		407644	422579	424112	391119	375066	385040	392300	386372	378480
C4H4N2O2	Uracil;	map00240 Pyrimidine metabolism; map00410 beta-Alanine metabolism; map00770 Pantothenate and CoA biosynthesis; map01100 Metabolic pathways		9456.23	8496.62	6906.06	9227.48	9024.79	8114.63	8022.82	7967.06	8966.83
C19H36O2	Lactobacillic acid; 11R,12S-Methylene-octadecanoic acid;	NULL		37054.6	33253.5	33030.8	37501.2	33266.3	33129.8	40078.2	34809.7	37881.8
C37H56O2	2-Hexaprenyl-6-methoxyphenol;	map00130 Ubiquinone and other terpenoid-quinone biosynthesis; map01110 Biosynthesis of secondary metabolites		353224	321332	312848	331346	317460	309907	339573	330928	328139
C55H91O4P	di-trans,poly-cis-Undecaprenyl phosphate; Undecaprenyl phosphate; ditrans,octacis-Undecaprenyl phosphate;	map00550 Peptidoglycan biosynthesis		1.58087e+07	1.48391e+07	1.45746e+07	1.49592e+07	1.47326e+07	1.42605e+07	1.538e+07	1.50733e+07	1.50534e+07
C22H44O3	22-Hydroxydocosanoate;	map00073 Cutin, suberine and wax biosynthesis		261789	316708	202451	170594	164006	187707	176424	252886	208437
C20H36O6	8,8a-Deoxyoleandolide;	map00522 Biosynthesis of 12-, 14- and 16-membered macrolides; map01130 Biosynthesis of antibiotics		45655.5	42964.2	42683.4	43759.4	43142.3	41918.2	42164.1	43453.1	45122.3
C30H50O4	Bryodulcosigenin;	NULL		31115.4	32931.9	35544	37739.7	33984.4	34297.6	31031.5	31064.8	31561.9
C11H19NO10S2	Progoitrin; 2(R)-2-Hydroxy-3-butenyl glucosinolate; Glucorapiferin;	NULL		40844.8	37878	38173	38319.3	36428.5	36370.9	37869.1	38100.8	39952.6
C27H44O	7-Dehydrocholesterol; Provitamin D3; Cholesta-5,7-dien-3beta-ol;	map00100 Steroid biosynthesis; map00981 Insect hormone biosynthesis; map01100 Metabolic pathways		114845	105499	106362	108320	107933	106597	110634	109113	106601
C26H44O2	(11Z,14Z,17Z,20Z)-Hexacosatetraenoic acid; 11Z,14Z,17Z,20Z-Hexacosatetraenoic acid; (11Z,14Z,17Z,20Z)-Hexacosa-11,14,17,20-tetraenoic acid;	NULL		33583.4	32837.7	30536.8	30342.4	28617.9	30359.4	28352.4	31771.8	29394.1
C27H40O3	Testosterone cypionate;	NULL		26795	29305.2	23923.3	28912.5	26242.9	27859.8	26831.4	26533.1	25056.6
C28H48O2	gamma-Tocopherol;	map00130 Ubiquinone and other terpenoid-quinone biosynthesis; map01100 Metabolic pathways; map01110 Biosynthesis of secondary metabolites		3.92042e+06	3.60357e+06	3.57088e+06	3.71559e+06	3.58613e+06	3.47228e+06	3.7692e+06	3.70834e+06	3.65312e+06
C22H30N4O4	Tentoxin;	NULL		111882	107911	105258	108041	104217	104222	106774	112470	108581
C12H26N8O3.[C6H12N4O]n	Polyarginine;	NULL		43312.7	42267	39925.7	48583.2	52227.4	46082.9	47325.9	47900.3	43045.1
C27H38O4	Azafrin;	NULL		779319	703305	707423	795050	787261	711311	767001	783211	725362
C10H19O7PS	Malaoxon;	NULL		171791	163757	159678	162552	154376	161867	167225	171481	163305
C22H36O	17-Propyl-5alpha-androst-2-en-17beta-ol;	NULL		327347	298025	296566	308336	304179	294334	316936	317656	300463
C23H38O	Geranylgeranylacetone; Teprenone;	NULL		19716.6	16860.6	18358.2	17203.1	17163.2	16710.3	17421.8	18773.3	17981.4
C24H46O2	(15Z)-Tetracosenoic acid; Nervonic acid; (Z)-15-Tetracosenoic acid;	map01040 Biosynthesis of unsaturated fatty acids		1.49449e+06	1.4229e+06	1.39368e+06	1.4099e+06	1.37137e+06	1.39416e+06	1.43044e+06	1.44246e+06	1.40554e+06
C26H44O9	Mupirocin;	NULL		115646	166207	221811	251065	193980	143520	176874	176066	169901
C20H32F2O	3,3-Difluoro-17-methyl-5alpha-androstan-17beta-ol;	NULL		33903.5	32610.2	32768.5	34584.7	34149.8	32935.8	34032.9	34938.4	31365.1
C2H6ClO3P	Ethephon;	NULL		34379	32752.4	34571.4	33065.1	35443.8	32068.3	38614.5	34250	36473.7
C27H46O2	Cerebrosterol; 24-Hydroxycholesterol; Cholest-5-ene-3,24-diol; (24S)-24-Hydroxycholesterol; (24S)-Cholest-5-ene-3beta,24-diol;	map00120 Primary bile acid biosynthesis		39403.8	36994.7	28106.1	28399.3	29062.1	29091.7	32724.2	36941.8	34780.7
C46H66O6	(2'S)-Deoxymyxol 2'-alpha-L-fucoside;	map00906 Carotenoid biosynthesis		648402	584497	571343	603840	594283	579565	636926	649137	612085
C32H64O3	Corynomycolic acid;	NULL		745955	689495	678793	691548	682601	662988	720076	720276	686375
C35H60O6	Eleutheroside A; Sitogluside; beta-Sitosterol D-glucoside;	NULL		126032	119558	123754	118920	108982	110120	121224	175233	302226
C28H48O5	7-Oxateasterone; (22R,23R,24S)-3beta,22,23-Trihydroxy-7-oxa-5alpha-ergostane-6-one;	map00905 Brassinosteroid biosynthesis		513413	485055	467966	464719	470667	462725	487400	490401	470359
C25H33NO6	Proansamitocin;	map01051 Biosynthesis of ansamycins; map01130 Biosynthesis of antibiotics		712833	641434	629158	1.83666e+06	2.62107e+06	1.6851e+06	1.17204e+06	1.31036e+06	997525
C30H46O5	Quillaic acid;	NULL		2.82396e+06	2.62008e+06	2.60786e+06	2.67377e+06	2.65321e+06	2.5591e+06	2.74065e+06	2.70011e+06	2.6365e+06
C33H42O4	Kolanone;	NULL		278665	259963	263160	341579	408878	305059	318880	325016	303168
C27H32O10	Spicatin;	NULL		6983.94	14149	23740.3	86225.9	145662	55414.5	38724.5	43836.5	21464.5
C19H34N8O8	Streptothricin F; Racemomycin A;	NULL		9183.81	8168.97	9104.86	157923	245469	122371	74902	89503.5	48037.9
C32H54O2	Hopane-29-acetate;	map01062 Biosynthesis of terpenoids and steroids; map01110 Biosynthesis of secondary metabolites		234292	212150	213024	225653	217952	209014	218942	223622	214619
C12H21NO3	N-Octanoyl-L-homoserine lactone; C8-HSL; N-[(3S)-Tetrahydro-2-oxo-3-furanyl]octanamide;	map02024 Quorum sensing		18619.3	18196.9	16318.4	16402.9	14871.8	16148	17498.9	16168.4	16607.6
C21H44O3	1-O-Octadecyl-sn-glycerol; 1-O-Octadecylglycerol; Batyl alcohol; Glycerol octadecyl ether;	NULL		149437	144012	139520	140337	133359	141646	144659	147830	138709
C29H48O2	(24R,24(1)R)-Fucosterol epoxide; (24R,28R)-Fucosterol epoxide; (3beta,24R,28R)-24,28-Epoxystigmast-5-en-3-ol; (24R,24'R)-Fucosterol epoxide;	NULL		36371.9	34942.3	33930.4	33639.3	31608.1	32281.6	32078.4	39611.1	35898.9
C37H50N2O	Methanophenazine; 2-(2,3-Dihydro-all-trans-pentaprenyloxy)phenazine; 2-(2,3-Dihydropentaprenyloxy)phenazine;	NULL		530204	497521	494708	482320	473892	453247	505795	493595	492911
C37H45NO4	Penitrem D;	map00403 Indole diterpene alkaloid biosynthesis		118325	103649	98931.5	111550	105587	99765.5	109921	111047	109221
C32H63NO3	N-(Tetradecanoyl)-sphing-4-enine;	NULL		87648.4	56149.2	66655.2	70919.2	54596.3	64135.4	63842.2	70482	69261
C14H21NO4	Codonopsine;	NULL		36581.8	33003.7	30953.3	32603.3	31316.9	31124.6	32132.5	32507.3	33713.9
C38H48N4O2	Santiaguine;	NULL		48862.1	42262.8	49111.8	46295.8	47525	48160.2	50983.4	51901.8	48009.6
C27H34O3	Nandrolone phenpropionate; Nandrolone phenylpropionate;	NULL		2.00197e+06	1.65132e+06	1.78435e+06	2.14436e+06	2.19737e+06	1.95601e+06	1.90685e+06	1.95867e+06	1.83659e+06
C22H32O6	Isodomedin;	NULL		80020	73889.9	71677.6	74788	70485.5	69197.8	74522.7	74224.5	72026.4
C30H34N4	Usambarine;	NULL		649656	614122	1.41965e+06	889157	754697	1.06251e+06	1.18161e+06	1.0998e+06	887254
C19H26Cl2N2O	U50488; trans-3,4-Dichloro-N-methyl-N-[2-(1-pyrrolidinyl)cyclohexyl]-benzeneacetamide;	NULL		25677.1	24995.2	14723.3	21557.6	22139.4	20876.2	25405.9	21586.2	22889.8
C32H52O4	3beta-Hydroxylanostane-7,11-dione acetate;	NULL		71843.7	81496.8	86504.1	87164.9	78001.6	82621.5	81814.2	82777.8	79818.8
C28H50	Ergostane;	NULL		163773	149689	153683	156519	152781	148449	163642	153431	156581
C28H48O2	(13Z,16Z,19Z,22Z)-Octacosatetraenoic acid; 13Z,16Z,19Z,22Z-Octacosatetraenoic acid; (13Z,16Z,19Z,22Z)-Octacosa-13,16,19,22-tetraenoic acid;	NULL		571931	558018	520125	525171	503246	524020	539442	548434	549920
C30H52O3	Protopanaxadiol; Dammar-24-ene-3beta,12beta,20-triol; (20S)-Protopanaxadiol;	NULL		151637	154760	148318	145478	127567	129562	136449	143979	134889
C24H39N5O6	Syringolin A;	NULL		22901	18797.7	19175.3	17932.7	17313.8	17859.7	19209	19254	17741.5
C52H78O3	3-Nonaprenyl-4-hydroxybenzoate; Nonaprenyl-4-hydroxybenzoate;	map00130 Ubiquinone and other terpenoid-quinone biosynthesis; map01110 Biosynthesis of secondary metabolites		1.3051e+06	1.2027e+06	1.18429e+06	1.22096e+06	1.21404e+06	1.14851e+06	1.24267e+06	1.22962e+06	1.21893e+06
C27H44O2	Calcidiol; 25-Hydroxyvitamin D3; Calcifediol; Calcifediol anhydrous; (3S,5Z,7E)-9,10-Seco-5,7,10(19)-cholestatriene-3,25-diol;	map00100 Steroid biosynthesis; map01100 Metabolic pathways; map04928 Parathyroid hormone synthesis, secretion and action; map05152 Tuberculosis		345447	316384	316706	330262	323743	317125	357987	336313	324545
C25H43NO6	10-Deoxymethymycin; YC-17;	map00522 Biosynthesis of 12-, 14- and 16-membered macrolides; map01130 Biosynthesis of antibiotics		331754	297020	298432	313596	309359	291138	321900	319345	309174
C21H20O6	Curcumin; Kacha haldi;	map00945 Stilbenoid, diarylheptanoid and gingerol biosynthesis; map01110 Biosynthesis of secondary metabolites		398075	386138	366609	384217	405221	365914	386746	382424	386298
C49H76O3	Tocoretinate; Tretinoin tocoferil;	NULL		4.61343e+06	4.23184e+06	4.22798e+06	4.29703e+06	4.30122e+06	4.11048e+06	4.42299e+06	4.35207e+06	4.32382e+06
C35H64O6	Giganin;	NULL		64499.1	57651.4	62629.8	56625	67001.7	68639.5	72539.5	78726.8	76566.9
C30H50O4	Sapelin A;	NULL		290862	258524	259141	265790	263890	259790	279296	273022	251475
C12H25NaO4S	SDS; Sodium lauryl sulfate; Sodium dodecyl sulfate;	NULL		2.03306e+06	1.97236e+06	1.89564e+06	1.95962e+06	2.24016e+06	1.83862e+06	2.00055e+06	1.95499e+06	1.96256e+06
C29H44O3	Pfaffic acid;	NULL		26604.4	22675.1	20836.6	23466.8	22649.8	21530.6	23986.7	23513.4	22891.6
C28H43NO6	Borrelidin;	NULL		1.89879e+06	1.85682e+06	1.84121e+06	1.84145e+06	1.77181e+06	1.73863e+06	1.86325e+06	1.84991e+06	1.85631e+06
C28H36N4O4	Mucronine B;	NULL		32671.7	32389.3	35803.3	32155.6	34194.9	35037.8	34948.4	35651.5	34252.9
C30H40O4	Pristimerin;	NULL		646372	541451	582375	4.58442e+06	3.52544e+06	1.28481e+06	2.5779e+06	2.99225e+06	1.95781e+06
C16H26N2O5S	Cilastatin;	NULL		380790	374946	353892	365099	386266	355653	378230	371606	362826
C33H62O8	PM-toxin B;	NULL		877002	790369	792935	807317	798660	783174	834061	824222	798644
C29H46O3	Testosterone decanoate; 17beta-Hydroxyandrost-4-en-3-one decanoate;	NULL		106719	98518	96414.1	99598.6	107773	96131.8	105221	104320	102568
C24H48O3	2-Hydroxytetracosanoic acid;	NULL		148560	145283	142439	137980	131510	136234	144461	141878	145931
C30H36O4	Sophoranone;	NULL		107110	89452.6	99008.5	908937	1.2665e+06	745380	480903	532069	330410
C40H60	all-trans-zeta-Carotene;	map00906 Carotenoid biosynthesis; map01100 Metabolic pathways; map01110 Biosynthesis of secondary metabolites		460596	424383	425516	428516	423772	412899	437104	432048	422319
C21H27NO4	Nalbuphine;	NULL		3.79062e+06	3.62554e+06	3.57901e+06	3.60549e+06	3.47595e+06	3.52427e+06	3.70506e+06	3.71066e+06	3.65041e+06
C26H50O2	Ximenic acid; (17Z)-Hexacosenoic acid; 17Z-Hexacosenoic acid; (17Z)-Hexacos-17-enoic acid; (Z)-Hexacos-17-enoic acid;	NULL		637034	595384	671139	666397	643660	631303	662499	658204	638968
C31H52O3	Soyasapogenol D;	NULL		99185.7	88080.4	94025	106526	84203.1	87564.2	93116.8	94341.5	86623.7
C22H38N6O4	Chaksine;	NULL		78363.5	69494.7	70199.5	72913.1	72768.5	68508.6	72118.3	71029.1	75038.9
C43H74O7	Ecdysone palmitate; Ecdysone 3-palmitate;	NULL		1.68859e+06	1.56187e+06	1.53694e+06	1.58688e+06	1.5608e+06	1.51895e+06	1.63025e+06	1.59854e+06	1.56234e+06
C25H30N6O2	MC-207,110;	NULL		1.78668e+06	1.11759e+06	1.56221e+06	2.30392e+06	2.41933e+06	1.82935e+06	1.60637e+06	1.81409e+06	1.57873e+06
C21H34O11	Patrinoside;	NULL		497998	322025	435246	628642	671230	526386	452582	515643	453829
C29H33ClN2O2	Loperamide;	NULL		93652.2	76666.8	87113	1.31416e+06	1.92722e+06	1.06892e+06	650710	736890	428184
C25H25N7O3	Dabigatran;	NULL		55663.2	41669.7	36093.2	90216.5	58358.8	37356.2	69715.3	87918	70000.3
C42H83NO8P+	1-Hexadecanoyl-2-(9Z-octadecenoyl)-sn-glycero-3-phosphocholine;	NULL		6.03136e+06	5.6088e+06	5.52567e+06	5.69516e+06	5.62453e+06	5.43161e+06	5.84255e+06	5.74465e+06	5.63177e+06
C15H11I4NO4	Thyroxine; Levothyroxin; L-Thyroxine; O-(4-Hydroxy-3,5-diidophenyl)-3,5-diiodo-L-tyrosine; 3,5,3'5'-Tetraiodo-L-thyronine; T4;	map00350 Tyrosine metabolism; map01100 Metabolic pathways; map04080 Neuroactive ligand-receptor interaction; map04918 Thyroid hormone synthesis; map04919 Thyroid hormone signaling pathway; map04976 Bile secretion; map05320 Autoimmune thyroid disease		4.78408e+06	4.44998e+06	4.37996e+06	4.55788e+06	4.50853e+06	4.31657e+06	4.65801e+06	4.575e+06	4.4742e+06
C17H26N2O4S	Sultopride;	NULL		82182.9	83501.8	78372.7	80254.6	83478.1	77985.1	81303.2	88159.8	84743.2
C18H34O4	(8E,10S)-10-Hydroperoxyoctadeca-8-enoate; (8E,10S)-10-Hydroperoxy-8-octadecenoate;	NULL		370079	357487	354860	353048	348679	349556	358239	369680	358445
C28H54O4	(R)-3-(Tetradecanoyloxy)tetradecanoic acid; (R)-3-(Myristoyloxy)myristic acid;	NULL		1.65765e+06	1.54161e+06	1.51665e+06	1.49364e+06	1.45694e+06	1.44456e+06	1.55706e+06	1.52914e+06	1.51565e+06
C36H48N2O8	Ansatrienin A;	NULL		121813	78827.4	117100	103010	104648	111073	107413	134136	157740
C33H64O2	Tritriacontane-16,18-dione; N-Tritriacontane-16,18-dione;	NULL		54591.7	47455.1	46723.2	52528.4	47049	47679.1	51033.3	50761.9	49113.5
C12H19N3O	CGP 28014;	map07216 Catecholamine transferase inhibitors		90766.7	86018.8	76035.8	73454.7	78329.7	84361.5	82765.1	92471.2	75890.3
C15H30O2	12-Methyltetradecanoic acid;	map02020 Two-component system		389443	359627	348861	377054	386717	368453	377448	394057	393506
C30H42O8	Proscillaridin;	NULL		88266.3	92222.7	283173	241448	133000	185170	198603	176014	107283
C22H34N4O	1-Naphthylacetylspermine;	NULL		130445	118079	118802	119722	119989	111270	123936	123564	115369
C12HCl7O2	1,2,3,4,6,7,8-Heptachlorodibenzodioxin; 1,2,3,4,6,7,8-Heptachlorodibenzo-p-dioxin; 1,2,3,4,6,7,8-HpCDD; PCDD 73;	map00621 Dioxin degradation		346302	366780	353388	353695	372285	360068	378784	387737	327538
C31H60O5	1,2-Dimyristyl-sn-glycerol; 1,2-Ditetradecanoyl-sn-glycerol;	NULL		2.01723e+06	1.84554e+06	1.8373e+06	1.87268e+06	1.86638e+06	1.76483e+06	1.93664e+06	1.89644e+06	1.87683e+06
C41H62O	3,4-Dihydrospheroidene; Methoxyneurosporene;	map00906 Carotenoid biosynthesis; map01100 Metabolic pathways; map01110 Biosynthesis of secondary metabolites		312836	280264	270183	291251	271303	271662	273073	281181	279203
C21H39O7P	Oleoylglycerone phosphate;	NULL		452880	521520	1.0766e+06	482182	1.74991e+06	1.14585e+06	430929	442212	625885
C45H74O10	1,2-Di-(9Z,12Z,15Z-octadecatrienoyl)-3-O-beta-D-galactosyl-sn-glycerol;	NULL		227244	195370	197265	204378	206478	191805	212858	206579	199995
C29H58O	Nonacosan-10-one; Ginnone;	NULL		240979	234893	217785	237688	216998	222693	222060	242776	237332
C30H52O2	Lupan-3beta,20-diol; 3beta,20-Dihydroxylupane; Monogynol A;	map00909 Sesquiterpenoid and triterpenoid biosynthesis		915351	894337	874615	890532	866143	842488	891800	907580	876683
C39H51NO8	Lolitrem J;	NULL		56141.1	43571.3	40589	43069.3	40124.1	33894	55187.9	61278.3	56253.5
C27H43NO2	Solasodine;	map01066 Biosynthesis of alkaloids derived from terpenoid and polyketide		33619.6	33110.6	32037.8	32170.6	31212.9	29106.4	33354.9	32013.3	32611.4
C30H52O4	Sarcoaldesterol A; (3beta,5alpha,6beta,11alpha)-Gorgostane-3,5,6,11-tetrol;	NULL		2.353e+06	2.17255e+06	2.15801e+06	2.16175e+06	2.16758e+06	2.07379e+06	2.25662e+06	2.20429e+06	2.20809e+06
C35H60O4	Ribosylhopane;	NULL		2.64223e+06	2.42523e+06	2.40932e+06	2.48304e+06	2.45883e+06	2.3604e+06	2.54095e+06	2.51488e+06	2.49108e+06
C14H9Cl3	1-Chloro-2,2-bis(4'-chlorophenyl)ethylene; DDMU;	NULL		6.99586e+06	6.65135e+06	6.54175e+06	6.55046e+06	6.41951e+06	6.40593e+06	6.72973e+06	6.83766e+06	6.63831e+06
C22H24N2O5	Benazeprilat;	NULL		2.62208e+06	2.51528e+06	2.42914e+06	2.54411e+06	2.45444e+06	2.37972e+06	2.56176e+06	2.58305e+06	2.52344e+06
C19H20N2O3	Oxyphenbutazone;	NULL		341081	313864	320780	322944	312842	303970	323029	328355	328052
C40H58	beta-Zeacarotene;	map00906 Carotenoid biosynthesis		4.0074e+06	3.71337e+06	3.68882e+06	3.75803e+06	3.73407e+06	3.5461e+06	3.83798e+06	3.78542e+06	3.74459e+06
C37H72O4	1-O-Hexadecyl-2-(9Z-octadecenoyl)-sn-glycerol;	NULL		1.18369e+06	1.08646e+06	1.05942e+06	1.09523e+06	1.09309e+06	1.0401e+06	1.11709e+06	1.10301e+06	1.11588e+06
C27H44O	Desmosterol; 24-Dehydrocholesterol; Cholesta-5,24-dien-3beta-ol;	map00100 Steroid biosynthesis; map01100 Metabolic pathways		518732	478543	470661	479638	485349	464336	493723	486008	486137
C29H50O2	alpha-Tocopherol; Vitamin E;	map00130 Ubiquinone and other terpenoid-quinone biosynthesis; map01060 Biosynthesis of plant secondary metabolites; map01100 Metabolic pathways; map01110 Biosynthesis of secondary metabolites; map04216 Ferroptosis; map04977 Vitamin digestion and absorption		3.94743e+06	3.65205e+06	3.62903e+06	3.70906e+06	3.68276e+06	3.48901e+06	3.77862e+06	3.72792e+06	3.68717e+06
CH4N2O	Urea; Carbamide;	map00220 Arginine biosynthesis; map00230 Purine metabolism; map00240 Pyrimidine metabolism; map00330 Arginine and proline metabolism; map00780 Biotin metabolism; map00791 Atrazine degradation; map01100 Metabolic pathways; map01120 Microbial metabolism in diverse environments; map02010 ABC transporters; map05120 Epithelial cell signaling in Helicobacter pylori infection		4053.64	3608.07	3852.36	3758.46	3653.25	3548.29	3829.63	3855.64	3478.93
C27H46O	Cholesterol; Cholest-5-en-3beta-ol;	map00100 Steroid biosynthesis; map00120 Primary bile acid biosynthesis; map00140 Steroid hormone biosynthesis; map00981 Insect hormone biosynthesis; map00984 Steroid degradation; map01066 Biosynthesis of alkaloids derived from terpenoid and polyketide; map01100 Metabolic pathways; map01120 Microbial metabolism in diverse environments; map04913 Ovarian steroidogenesis; map04925 Aldosterone synthes…		9.12451e+06	8.54691e+06	8.37698e+06	8.58265e+06	8.53433e+06	8.09041e+06	8.7831e+06	8.62814e+06	8.62951e+06
C28H46O	4alpha-Methylzymosterol;	map00100 Steroid biosynthesis; map01100 Metabolic pathways; map01130 Biosynthesis of antibiotics		42789.5	38801.2	39559.5	45231.1	42182.1	41766.7	47322.2	45771.2	38648.7
C16H18N2O7S2	Sulbenicillin;	NULL		2.85047e+06	2.74398e+06	2.64451e+06	2.67743e+06	2.65227e+06	2.61475e+06	2.73775e+06	2.78894e+06	2.70826e+06
C10H8Cl8	Octachlorocamphene;	NULL		1.6445e+06	1.6863e+06	1.67284e+06	1.66658e+06	1.73691e+06	1.66309e+06	1.6706e+06	1.77182e+06	1.54203e+06
C35H60N2O4+2	Pancuronium;	NULL		581223	532340	532775	537868	538367	524878	548482	538031	537449
C47H70O3	3-Octaprenyl-4-hydroxybenzoate; 4-Hydroxy-3-octaprenylbenzoate;	map00130 Ubiquinone and other terpenoid-quinone biosynthesis; map01110 Biosynthesis of secondary metabolites		331774	290390	295769	296705	298210	280122	313789	305719	305267
C24H48O2	Tetracosanoic acid; Lignoceric acid;	map01040 Biosynthesis of unsaturated fatty acids		5.5989e+06	5.33919e+06	5.29863e+06	5.32898e+06	5.25454e+06	5.20178e+06	5.42689e+06	5.54729e+06	5.44891e+06
C27H48O4	3alpha,7alpha,12alpha,26-Tetrahydroxy-5beta-cholestane; 5beta-Cholestane-3alpha,7alpha,12alpha,26-tetraol; 5beta-Cholestane-3alpha,7alpha,12alpha,26-tetrol;	map00120 Primary bile acid biosynthesis; map01100 Metabolic pathways		244857	228256	242234	237378	237846	231668	234999	256551	255230
C31H48O3	3-Hydroxy-vitamin K; 3-Hydroxy-2-methyl-3-phytyl-2,3-dihydronaphthoquinone; 3-Hydroxy-2-methyl-3-phytyl-2,3-dihydro-1,4-naphthoquinone;	NULL		68337.7	66390	64413.6	70435.5	62013.9	59681	64873.5	76406.8	66722.7
C29H47NO6	Mycinamicin VIII;	map01130 Biosynthesis of antibiotics		275767	266683	258595	270578	255247	250237	263329	266614	261436
C29H44O8	Cyasterone;	NULL		59393.6	61480.9	67293.9	68825.2	59407.9	60566.1	68803.4	57121.4	64454.9
C33H40N4O6	D-Urobilin;	map00860 Porphyrin and chlorophyll metabolism; map01100 Metabolic pathways; map01110 Biosynthesis of secondary metabolites		37369.3	39584.6	35251.1	39098.6	39504.7	38093.5	39609.9	43586.1	36977
C6H7NO4	2-Aminomuconate; 2-Aminomuconic acid; o-Aminomuconate;	map00380 Tryptophan metabolism; map01100 Metabolic pathways		37546.7	37229.4	36699.6	35927.1	35317	36506.7	37349.6	41325.5	40614.2
C35H46O	4'-Apo-beta,psi-caroten-4'-al; beta-Apo-4'-carotenal;	map00906 Carotenoid biosynthesis; map01100 Metabolic pathways		60460.6	55469.7	54499.6	63135.6	60312.6	49979	57245	61649	58495.3
C32H52O2	Lupeol acetate; 3-Acetyllupeol;	NULL		502027	464698	452823	472781	468545	452506	482893	477852	474071
C35H47NO10	Proansamycin X;	map01051 Biosynthesis of ansamycins; map01130 Biosynthesis of antibiotics		12600.8	10662.3	16559.4	12938.6	12849.5	14710.6	13912.6	14519.5	20452.8
C24H51NO7P+	1-Palmitoylglycerophosphocholine; 1-Palmitoyl-sn-glycero-3-phosphocholine;	NULL		43423.4	42416.5	41273.2	42588.9	44255.3	40998.3	45380.4	45258.7	41386.6
C45H78O2	Cholesteryl oleate; Cholest-5-en-3-beta-yl oleate; Cholesteryl cis-9-octadecenoate;	NULL		1.4542e+06	1.33601e+06	1.33244e+06	1.34614e+06	1.36137e+06	1.29523e+06	1.37603e+06	1.35675e+06	1.35809e+06
C29H50O	4,4-Dimethyl-5alpha-cholesta-8-en-3beta-ol;	map00100 Steroid biosynthesis		416176	390699	506566	621793	462316	963257	1.29895e+06	834199	385525
C13H10BrCl2O3PS	Leptophos;	NULL		227040	210372	208131	215068	223686	219247	246218	234348	205830
C9H16O5S	2-(4'-Methylthio)butylmalic acid; 2-(4'-Methylthio)butylmalate;	map00966 Glucosinolate biosynthesis; map01210 2-Oxocarboxylic acid metabolism		39503.6	35256	36907.7	38587	36091.1	35233.5	37466.7	37768.1	37876.2
C40H56	beta-Carotene; all-trans-beta-Carotene;	map00830 Retinol metabolism; map00906 Carotenoid biosynthesis; map01060 Biosynthesis of plant secondary metabolites; map01062 Biosynthesis of terpenoids and steroids; map01070 Biosynthesis of plant hormones; map01100 Metabolic pathways; map01110 Biosynthesis of secondary metabolites; map04977 Vitamin digestion and absorption		468083	445727	428562	437931	440026	434303	462140	448087	443671
C6H8N2O3	N-Nitrosoguvacine;	NULL		496428	459365	452630	462375	459333	438813	479690	471427	464459
C30H38O	4,4'-Diapolycopen-4-al;	NULL		1.05044e+06	960887	941480	970399	974025	915289	1.0253e+06	983169	974449
C53H80O4	3-Demethylubiquinone-9;	NULL		3.59249e+06	3.32321e+06	3.28906e+06	3.38495e+06	3.36907e+06	3.22029e+06	3.46837e+06	3.41446e+06	3.37302e+06
C28H50O2	3-epi-6-Deoxocathasterone;	map00905 Brassinosteroid biosynthesis		24278.2	25854.9	25174.4	26736.5	27669.9	26150.1	28291.7	27730.8	29149.2
C30H58O4	(R)-3-(Tetradecanoyloxy)hexadecanoic acid;	NULL		1.70861e+06	1.5754e+06	1.56436e+06	1.599e+06	1.60292e+06	1.5285e+06	1.65013e+06	1.60689e+06	1.59976e+06
C39H58O4	Ubiquinone-6; Coenzyme Q6;	map00130 Ubiquinone and other terpenoid-quinone biosynthesis; map01110 Biosynthesis of secondary metabolites		278456	251977	247616	259827	257076	248565	262704	261073	259883
C53H80O2	Plastoquinone-9; Plastoquinone A;	NULL		1.66217e+06	1.51551e+06	1.51262e+06	1.55157e+06	1.54246e+06	1.45546e+06	1.59474e+06	1.57054e+06	1.54814e+06
C38H51NO6	Lolicine B;	NULL		193691	128692	171433	151773	167797	200378	186388	215994	218729
C26H36N6O5	Angiotensin (5-8); Angiotensin-(5-8);	map04614 Renin-angiotensin system		102303	88808.6	91662.1	100980	98603.2	92703.4	100526	100467	101479
C34H48O7	6,8a-Seco-6,8a-deoxy-5-oxoavermectin ''1a'' aglycone;	map00522 Biosynthesis of 12-, 14- and 16-membered macrolides; map01130 Biosynthesis of antibiotics		154173	136268	137256	141474	140862	131194	143765	145922	145985
C8H5NO2	Indole-5,6-quinone;	map00350 Tyrosine metabolism; map01100 Metabolic pathways		9180.58	9188.48	9048.93	9099.85	8687.93	8481.36	8886.69	9149.31	8927.9
C6H6N2O2	Urocanate; Urocanic acid;	map00340 Histidine metabolism; map01100 Metabolic pathways		69197	65417.3	65068.7	64322.6	65239.4	60356.6	67887	67717.4	66834.5
C14H12O4	Wyerone acid;	NULL		318122	301232	299395	297939	291608	291458	305237	306317	304676
C6H8N2O3	(S)-3-(Imidazol-5-yl)lactate;	NULL		1.73887e+06	1.67201e+06	1.64595e+06	1.65252e+06	1.60407e+06	1.61095e+06	1.68643e+06	1.71018e+06	1.6568e+06
C13H6	1-Tridecene-3,5,7,9,11-pentayne; Tridec-1-ene-3,5,7,9,11-pentayne;	NULL		635801	578701	564591	590843	587127	560387	613292	601048	576744
C12H13NO2S	Carboxin;	NULL		2.7926e+06	2.67522e+06	2.63387e+06	2.65881e+06	2.59846e+06	2.59624e+06	2.74341e+06	2.77451e+06	2.68008e+06
C12H10O5	2-O,3-Dimethylflaviolin;	NULL		2.47832e+06	2.37093e+06	2.30689e+06	2.35103e+06	2.31223e+06	2.3028e+06	2.40057e+06	2.43287e+06	2.3709e+06
C14H14O6	3-Hydroxy-6,7,8-trimethoxy-2-naphthoate;	map01059 Biosynthesis of enediyne antibiotics; map01130 Biosynthesis of antibiotics		1.05947e+06	1.00695e+06	983990	997220	983441	973480	1.01803e+06	1.03743e+06	1.00169e+06
C19H16Cl2N2O4S	Pyrazolate; 4-(2,4-Dichlorobenzoyl)-1,3-dimethyl-5-pyrazolyl p-toluenesulfonate;	NULL		4.71577e+06	4.52381e+06	4.36415e+06	4.44217e+06	4.37021e+06	4.33457e+06	4.5325e+06	4.69326e+06	4.45657e+06
C10H15N4O14P3	dXTP;	NULL		2.26357e+06	2.17964e+06	2.09284e+06	2.13206e+06	2.06794e+06	2.07748e+06	2.22442e+06	2.25135e+06	2.13802e+06
C41H62O2	3',4'-Dihydrorhodovibrin;	map00906 Carotenoid biosynthesis; map01100 Metabolic pathways		203590	188234	202320	194115	198337	192540	200230	202248	192381
C19H22O7	Gibberellin A8-catabolite;	map00904 Diterpenoid biosynthesis		757082	730873	717470	735750	705716	705151	730606	745829	733489
C28H50O4	6-Deoxocastasterone;	map00905 Brassinosteroid biosynthesis; map01100 Metabolic pathways; map01110 Biosynthesis of secondary metabolites		125595	136491	135134	130339	117201	123846	142468	146609	127233
C48H72O4	2-Octaprenyl-3-methyl-5-hydroxy-6-methoxy-1,4-benzoquinone;	map00130 Ubiquinone and other terpenoid-quinone biosynthesis; map01110 Biosynthesis of secondary metabolites		49937	51862.1	48560.4	54916.3	47127.4	53137.3	61910.2	53615.4	48796.7
C5H9NO4	N-Methyl-D-aspartic acid; N-Methyl-D-aspartate; NMDA;	NULL		88216.3	82733.9	80287.5	82387	82301.3	79976.8	84885.5	84525.3	81700.6
C9H12N5O6P	7,8-Dihydroneopterin 2',3'-cyclic phosphate;	map00790 Folate biosynthesis; map01100 Metabolic pathways		79032.6	73300.7	67785.3	73695.9	72088.3	68134.2	74017.3	75569.6	71618.6
C25H18N4O3	Asperlicin E;	NULL		20188.1	17578.9	19087.7	18626.4	17542.7	15457.8	20970.8	17558.6	20961.1
C27H47N7O6	JSTX-3; Joro spider toxin;	NULL		78115.3	67637.2	71015.6	71243.9	69207.4	71558.9	74310.2	72875.2	67068.7
C2H7AsO	Dimethylarsinous acid;	map05204 Chemical carcinogenesis		63214.5	57376.1	54414.7	59309.5	58712.5	57529	66309.3	62568.1	61201.9
C27H48O3	3alpha,7alpha,26-Trihydroxy-5beta-cholestane; 5beta-Cholestane-3alpha,7alpha,26-triol;	map00120 Primary bile acid biosynthesis; map01100 Metabolic pathways		1.08165e+06	993496	984201	1.00898e+06	983290	963978	1.02508e+06	998045	1.01597e+06
C6H10O6Zn	Zinc lactate;	NULL		115684	115134	114497	117971	119710	112163	119431	122881	112392
C14H9BrCl2	1-[2-Bromo-1-(4-chlorophenyl)ethenyl]-2-chlorobenzene;	NULL		58823.4	60395.2	57760.5	59081.4	59386.8	61512.7	68692.8	64515.5	58580.6
C42H68O8	Mycolactone F;	map01052 Type I polyketide structures		309886	288859	290919	265881	281075	268073	297625	296363	293776
C33H56O6	Cholesteryl-beta-D-glucoside;	NULL		355747	323055	319863	338482	332578	313817	351782	347134	321892
C3H6O3S	3-Mercaptolactate; L-3-Mercaptolactate; (R)-3-Mercaptolactate;	map00270 Cysteine and methionine metabolism		4.37085e+06	4.06508e+06	3.95308e+06	4.06763e+06	4.02922e+06	3.85235e+06	4.21809e+06	4.11758e+06	4.07043e+06
C6H8O3	Dihydro-4,4-dimethyl-2,3-furandione; 2-Dehydropantoyl lactone; 2-Dehydropantolactone;	NULL		1.57108e+06	1.42885e+06	1.42637e+06	1.46354e+06	1.44719e+06	1.38823e+06	1.52788e+06	1.48437e+06	1.47862e+06
C43H73O6P	2,3-Bis-O-(geranylgeranyl)glycerol 1-phosphate; 2,3-Bis-O-(geranylgeranyl)-sn-glycerol-1-phosphate; 2,3-Digeranylgeranyl sn-glycerol 1-phosphate;	map00564 Glycerophospholipid metabolism		1.3256e+06	1.21257e+06	1.19605e+06	1.23932e+06	1.22543e+06	1.16561e+06	1.25905e+06	1.24799e+06	1.22682e+06
C31H52O3	alpha-Tocopherol acetate; Tocopherol acetate;	map04977 Vitamin digestion and absorption		739659	685458	679962	694178	692108	648862	718587	719415	713036
C12H4Br6O	2,2',4,4',5,5'-Hexabromodiphenyl ether; BDE 153;	NULL		113872	110146	100708	107416	103171	99234.8	103401	105658	110037
C3H3N3O2S	2-Amino-5-nitrothiazole; Aminonitrothiazole;	NULL		119413	116413	113604	115481	111766	110990	118418	115028	115023
C10H10N2O2	4-Methoxy-2,2'-bipyrrole-5-carbaldehyde; 4-Methoxy-2,2'-bipyrrole-5-carboxaldehyde;	map00333 Prodigiosin biosynthesis; map01130 Biosynthesis of antibiotics		6.39904e+06	5.97015e+06	5.79451e+06	6.01542e+06	5.96228e+06	5.67828e+06	6.19595e+06	6.13235e+06	6.06631e+06
C49H94O6	1-Dodecanoyl-2-hexadecanoyl-3-octadecanoyl-sn-glycerol;	NULL		3.7708e+07	3.5337e+07	3.45481e+07	3.52892e+07	3.51419e+07	3.34995e+07	3.60874e+07	3.56089e+07	3.53309e+07
C3H6ClNO2	3-Chloro-D-alanine;	NULL		108715	105594	98532.3	102740	100645	98193.8	101958	105722	97571
C10H12BrN5O4	8-Bromoadenosine;	NULL		2.01766e+06	1.96056e+06	1.908e+06	1.90489e+06	1.85217e+06	1.86278e+06	1.95367e+06	1.98402e+06	1.94284e+06
C35H62O4	Bacteriohopanetetrol; Tetrahydroxybacteriohopane; Bacteriohopane-32,33,34,35-tetrol;	NULL		126888	108949	112260	120589	113366	107636	121051	120625	114841
C10H6N2O2S2	Oxidized Photinus luciferin; Firefly oxyluciferin; 4,5-Dihydro-2-(6-hydroxy-1,3-benzothiazol-2-yl)thiazol-4-one;	NULL		219624	218264	217292	231533	218064	218077	229806	223036	224227
C27H34O4	2,2-Dibutyl-3-(4-methoxyphenyl)-4-methyl-2H-1-benzopyran-7-ol acetate;	NULL		85443	80041.7	75969.3	87543.3	82499.9	80156.9	81039.6	78630.1	78540.3
C21H28N2O5S2	Hycanthone mesylate;	NULL		2.29844e+06	2.18904e+06	2.15435e+06	2.19822e+06	2.11739e+06	2.10708e+06	2.21973e+06	2.2393e+06	2.1841e+06
C46H70O	2-Octaprenylphenol;	map00130 Ubiquinone and other terpenoid-quinone biosynthesis; map01110 Biosynthesis of secondary metabolites		59530.8	54020.7	50703.4	50190.6	60513.4	46989.7	56117.3	55783.8	59583.2
ClNa	Sodium chloride;	NULL		10578.7	12277.8	9515.1	9640.63	8560.22	11648.7	10827.5	11965.3	11061.6
C6H5F	Fluorobenzene;	map00364 Fluorobenzoate degradation; map01120 Microbial metabolism in diverse environments; map01220 Degradation of aromatic compounds		540449	491853	489685	497617	494150	470177	512720	509327	503485
C24H23O13+	Pelargonidin 3-O-(6-O-malonyl-beta-D-glucoside);	map00942 Anthocyanin biosynthesis		219454	206116	204668	208621	201065	201012	211452	220456	206908
C3H4Cl2	trans-1,3-Dichloropropene; trans-3-Chloroallyl chloride;	map00625 Chloroalkane and chloroalkene degradation; map01100 Metabolic pathways; map01120 Microbial metabolism in diverse environments		63509.6	60519.6	58652.3	58895.2	58776.3	55244.4	59977	59414.9	57120.7
C4H4Na2O5	Disodium malate; Disodium DL-malate;	NULL		131157	117901	112879	121508	122099	113953	122438	123788	116965
C12H14N4O4S	Sulfadoxine;	NULL		1.14626e+06	1.09316e+06	1.06883e+06	1.0772e+06	1.05823e+06	1.04695e+06	1.09691e+06	1.11649e+06	1.07019e+06
C42H85NO7P+	1-O-Hexadecyl-2-(9Z-octadecenoyl)-sn-glycero-3-phosphocholine;	NULL		6.38887e+06	5.83187e+06	5.77674e+06	5.97222e+06	5.92154e+06	5.62125e+06	6.11583e+06	6.02354e+06	5.91588e+06
C8H8N2O2	Ricinine;	NULL		24151.2	23524.1	22547.8	22904.9	24071.1	22202.5	24626	23625.7	23753.4
C19H28O4	Testolate;	NULL		166448	149286	153122	154618	152376	143136	159776	164506	156687
C27H31ClO15	Cyanidin-3-rhamnoglucoside chloride; Cyanidin 3-rutinoside chloride; Keracyanin chloride;	NULL		2.86227e+06	2.69551e+06	2.68749e+06	2.73194e+06	2.64025e+06	2.62752e+06	2.79264e+06	2.8206e+06	2.75578e+06
C36H62O9	Ginsenoside F1;	NULL		329087	303365	301555	310910	297078	293771	303503	308536	298089
C14H11Cl3	1-Chloro-2,2-bis(4'-chlorophenyl)ethane; DDMS;	NULL		126291	111724	103792	107525	105258	106224	109921	107237	110253
C31H60O2	14,16-Hentriacontanedione; Hentriacontane-14,16-dione;	NULL		54902.2	52511.6	52977.3	52107.1	53351.6	48372.5	55643.2	57896.4	58032.8
C7H10N2O4	AMPA; alpha-Amino-3-hydroxy-5-methyl-4-isoxazolepropionic acid;	NULL		5.26873e+06	4.92959e+06	4.85004e+06	4.96975e+06	4.96665e+06	4.69909e+06	5.13767e+06	5.02678e+06	4.96515e+06
C26H52O2	Cerotic acid; Hexacosanoic acid;	NULL		2.28933e+06	2.18714e+06	2.12648e+06	2.11955e+06	2.13209e+06	2.11712e+06	2.18639e+06	2.1767e+06	2.1913e+06
C28H48O6	Brassinolide;	map00905 Brassinosteroid biosynthesis; map01060 Biosynthesis of plant secondary metabolites; map01062 Biosynthesis of terpenoids and steroids; map01070 Biosynthesis of plant hormones; map01100 Metabolic pathways; map01110 Biosynthesis of secondary metabolites; map04075 Plant hormone signal transduction		44055	44520.4	45442.7	46230.9	40989.7	45581	39402.3	45851.6	50792.6
C37H47NO6	Lolitrem K;	NULL		38534.1	37865.6	40864.7	33950.5	37533.4	42990.2	39348	38458.4	39841.8
C41H79N3O12	Tulathromycin A;	NULL		48286.9	46174.9	42688.7	48702.2	43754	45800.8	45250	45599.8	44135.3
C55H92O7P2	di-trans,poly-cis-Undecaprenyl diphosphate; Undecaprenyl diphosphate; Bactoprenyl diphosphate; ditrans,octacis-Undecaprenyl diphosphate;	map00550 Peptidoglycan biosynthesis; map00900 Terpenoid backbone biosynthesis; map01062 Biosynthesis of terpenoids and steroids; map01110 Biosynthesis of secondary metabolites		197678	173786	172694	180739	177336	176349	188661	180942	180398
C5H10O4S2	2-Oxopropyl-CoM; 2-(2-Oxopropylthio)ethanesulfonate;	NULL		15999.2	14428.1	14151.9	14410.6	14931.7	12800.2	15052.5	15845.9	14104.8
C12H9NaO2	1-Naphthaleneacetic acid sodium salt;	NULL		668543	646128	599021	645807	634843	598779	637715	650653	624410
C9H4N2S3	Thioquinox;	NULL		1.06538e+06	979518	954368	977633	957427	942554	1.02228e+06	1.02101e+06	978447
C6H11N3O3	5-Guanidino-2-oxopentanoate; 5-Guanidino-2-oxo-pentanoate; 2-Oxo-5-guanidinopentanoate; 2-Oxo-5-guanidino-pentanoate; 2-Oxoarginine;	map00330 Arginine and proline metabolism; map00472 D-Arginine and D-ornithine metabolism; map01100 Metabolic pathways		114442	107196	108786	102182	102822	108256	108780	107733	108384
C12H6Cl4	3,4,3',4'-Tetrachlorobiphenyl; PCB 77;	map00621 Dioxin degradation		1.00657e+06	978761	897201	928137	907057	888795	939135	961041	920766
C14H4N2O2S2	Dithianon;	NULL		849695	778847	733455	766269	758857	737475	799599	800003	753439
C48H72O3	2-Octaprenyl-3-methyl-6-methoxy-1,4-benzoquinone;	map00130 Ubiquinone and other terpenoid-quinone biosynthesis; map01110 Biosynthesis of secondary metabolites		5.14981e+06	4.8036e+06	4.70635e+06	4.83793e+06	4.78811e+06	4.5831e+06	4.958e+06	4.88882e+06	4.80056e+06
C14H11Cl4O4P	Phosdiphen;	NULL		344862	335800	318859	324927	309828	317574	325933	331291	326888
C3H7NO4S	3-Sulfino-L-alanine; L-Cysteinesulfinic acid; 3-Sulphino-L-alanine; 3-Sulfinoalanine;	map00270 Cysteine and methionine metabolism; map00430 Taurine and hypotaurine metabolism; map01100 Metabolic pathways		792257	768264	759259	769352	739952	747703	788379	785904	767232
C32H60NO10P	1-Palmitoyl-2-(5-hydroxy-8-oxo-6-octenoyl)-sn-glycero-3-phosphocholine; 1-Palmitoyl-2-(5-hydroxy-8-oxooct-6-enoyl)-sn-glycero-3-phosphocholine;	NULL		249452	240531	246869	252083	281119	261268	249662	312125	324139
C13H15NO6	4-Hydroxyphenylacetylglutamic acid; p-Hydroxyphenylacetylglutamic acid; 4-Hydroxyphenylacetylglutamate; p-Hydroxyphenylacetylglutamate;	map00350 Tyrosine metabolism		1.43207e+06	1.36754e+06	1.36518e+06	1.35166e+06	1.32264e+06	1.29892e+06	1.37588e+06	1.37993e+06	1.35701e+06
C9H13N2O8P	dUMP; Deoxyuridylic acid; Deoxyuridine monophosphate; Deoxyuridine 5'-phosphate; 2'-Deoxyuridine 5'-phosphate;	map00240 Pyrimidine metabolism; map01100 Metabolic pathways; map01523 Antifolate resistance		2.52802e+06	2.42453e+06	2.39126e+06	2.39665e+06	2.34056e+06	2.31563e+06	2.44584e+06	2.47012e+06	2.40455e+06
C23H30N2	Emopamil;	NULL		6.14259e+06	5.88404e+06	5.81883e+06	5.83911e+06	5.69106e+06	5.65654e+06	5.92596e+06	5.9846e+06	5.87646e+06
C25H32O13	Oleuropein;	NULL		466176	462388	457094	470025	443390	444044	458859	463143	452815
C16H23N6O10P	L-2-Aminoadipate adenylate; 5-Adenylyl-2-aminoadipate; alpha-Aminoadipoyl-C6-AMP;	map00300 Lysine biosynthesis		795891	771929	742868	759074	725728	709338	770565	772956	746635
C35H37ClN2O11	Clorobiocin; Chlorobiocin;	map00401 Novobiocin biosynthesis; map01130 Biosynthesis of antibiotics		172645	160121	149938	156353	149085	151929	164907	166851	143249
C26H39NO5S	Epothilone C;	NULL		283688	272663	278089	271159	267859	256154	264448	274184	272901
C35H62O3	Epoxymurin-A;	NULL		99963.3	93591.6	100717	104767	112548	105364	106695	107302	102545
C6H7MgO9P	Magnesium L-ascorbic acid-2-phosphate; VC-PMG; AP;	NULL		1.14196e+06	1.08941e+06	1.08066e+06	1.09352e+06	1.04868e+06	1.04142e+06	1.11857e+06	1.11635e+06	1.08415e+06
C7H15Cl2N2O4P	Carboxyphosphamide; Carboxycyclophosphamide;	map00982 Drug metabolism - cytochrome P450		4.47594e+06	4.27707e+06	4.18474e+06	4.2407e+06	4.13323e+06	4.11357e+06	4.32762e+06	4.39937e+06	4.23038e+06
H6N2O3S	Ammonium sulfamate;	NULL		44893.8	42780.6	43549	42410.1	42352.1	38631.7	42597.4	44054.1	42544.6
C8H4O3S2	Thiotropocin;	NULL		1.52949e+06	1.47181e+06	1.45076e+06	1.46419e+06	1.42289e+06	1.41171e+06	1.49097e+06	1.50568e+06	1.46372e+06
C3H7NO5S	L-Cysteate; L-Cysteic acid; 3-Sulfoalanine; 2-Amino-3-sulfopropionic acid;	map00270 Cysteine and methionine metabolism; map00430 Taurine and hypotaurine metabolism; map01100 Metabolic pathways; map04080 Neuroactive ligand-receptor interaction		510446	494598	486773	494507	474110	472779	500484	497965	486439
C6H14NO7P	2-Amino-1,5-anhydro-2-deoxyglucitol;	NULL		567753	534630	534198	531000	514602	507444	548606	551211	537962
C21H31FO3	5alpha-Androstane-2beta-fluoro-17beta-ol-3-one acetate; (2beta,5alpha,17beta)-17-(Acetyloxy)-2-fluoro-androstan-3-one;	NULL		218672	203060	203189	208894	197091	195218	204621	213792	203116
C9H5Cl3O2	2-(4'-Chlorophenyl)-3,3-dichloropropenoate;	map00621 Dioxin degradation; map01120 Microbial metabolism in diverse environments; map01220 Degradation of aromatic compounds		688507	658169	660125	658671	640481	638541	684868	685569	657548
C2H2CaO4	Calcium formate; Formic acid, calcium salt;	NULL		558379	521019	524708	529939	507001	504603	534350	533219	532978
C7H5Cl2FN2O3	Fluroxypyr;	NULL		863987	808148	804525	808582	777723	776027	832734	818772	814879
C9H15N2O14P3	dUTP; 2'-Deoxyuridine 5'-triphosphate;	map00240 Pyrimidine metabolism; map01100 Metabolic pathways		3.22765e+06	3.04586e+06	2.99569e+06	3.00862e+06	2.90887e+06	2.92957e+06	3.1187e+06	3.13068e+06	3.10732e+06
C20H24N10O13P2	Cyclic GMP-AMP; Cyclic Gp(2'-5')Ap(3'-5'); cGAMP(2'-5');	map04623 Cytosolic DNA-sensing pathway; map05163 Human cytomegalovirus infection; map05170 Human immunodeficiency virus 1 infection		221468	218336	211508	207753	201488	199870	222706	222932	219339
H2MoO4	Molybdate;	map02010 ABC transporters		802885	763756	761240	773696	744445	752492	787389	794385	776479
C8H13N2O3PS	Thionazin;	NULL		3.31567e+06	3.15968e+06	3.14027e+06	3.16735e+06	3.08798e+06	3.06494e+06	3.22311e+06	3.26266e+06	3.14996e+06
C6H13O7P	(R)-Mevalonate 3-phosphate; (R)-3-Phosphomevalonate;	map00900 Terpenoid backbone biosynthesis; map01110 Biosynthesis of secondary metabolites; map01130 Biosynthesis of antibiotics		8.42716e+06	7.98071e+06	7.91152e+06	7.94805e+06	7.69565e+06	7.69716e+06	8.14293e+06	8.14903e+06	8.04912e+06
C10H8O6S2	1,6-Naphthalenedisulfonic acid;	map00626 Naphthalene degradation		8.04419e+06	7.66022e+06	7.55771e+06	7.57815e+06	7.33694e+06	7.31852e+06	7.78178e+06	7.77631e+06	7.69978e+06
C6H13NO3S	Cyclohexylsulfamate; Cyclohexylsulfamic acid; Cylamic acid; Cyclohexylamide sulfate;	map00930 Caprolactam degradation; map01120 Microbial metabolism in diverse environments		206256	194354	194664	194329	188891	189208	199638	196814	192766
C6H9O9P	L-Ascorbate 6-phosphate;	map00053 Ascorbate and aldarate metabolism; map01100 Metabolic pathways; map01120 Microbial metabolism in diverse environments; map02060 Phosphotransferase system (PTS)		73584.8	66972.3	63761.6	67222.1	62925.1	64149.1	63406.3	69680.7	65600.9
C22H20N2O7	Adifoline;	NULL		312238	306372	298432	299638	296856	285318	303437	303398	299712
C4H9O6P	L-3,4-Dihydroxybutan-2-one 4-phosphate; 1-Deoxy-L-glycero-tetrulose 4-phosphate; 2-Hydroxy-3-oxobutyl phosphate;	map00740 Riboflavin metabolism; map01100 Metabolic pathways; map01110 Biosynthesis of secondary metabolites		1.78749e+07	1.69602e+07	1.68003e+07	1.68556e+07	1.62512e+07	1.62532e+07	1.72707e+07	1.72746e+07	1.71128e+07
C19H39O7P	1-Palmitoylglycerol 3-phosphate; 1-Hexadecanoyl-sn-glycero-3-phosphate;	NULL		28046.3	26095.7	52268.2	22166	70331.1	42544	20314.5	21371.1	22987.3
C3H4Cl2F2O	Methoxyflurane;	NULL		29990.4	26658.8	27133.5	26887.5	23808.9	23789.6	28089.3	26998.8	26609.9
C12H8O3	5-Methylangelicin;	NULL		926589	886798	885978	883427	869564	863753	907754	909588	886543
C14H11N3O3S	Nocodazole;	NULL		354249	335141	331987	337624	330260	325767	340994	342330	337998
C14H16N2O6S	Asparenomycin A;	NULL		2.13489e+06	2.06647e+06	2.03443e+06	2.02419e+06	1.99994e+06	1.9763e+06	2.08328e+06	2.11049e+06	2.05183e+06
C3H7CaO6P	Calcium glycerophosphate; Calcium beta-glycerophosphate;	NULL		35173.2	30533.3	28295.2	30218.8	29161.6	28709.3	30493	31100.1	31056.5
C13H10Cl2O2	Dichlorophen; 2,2'-Methylenebis(4-chlorophenol);	NULL		22324.8	18305.4	20270.6	20016.2	17856.7	17699.6	20394.1	20878.6	18021
C7H4NNaO3S	Saccharin sodium anhydrous;	map04742 Taste transduction; map04973 Carbohydrate digestion and absorption		3.03006e+06	2.93125e+06	2.87842e+06	2.88973e+06	2.78726e+06	2.77897e+06	2.93305e+06	2.96438e+06	2.85335e+06
C13H10O3	4,4'-Dihydroxybenzophenone;	map00363 Bisphenol degradation; map01120 Microbial metabolism in diverse environments		1.74225e+06	1.66476e+06	1.65103e+06	1.65168e+06	1.59871e+06	1.60412e+06	1.68551e+06	1.70199e+06	1.65147e+06
C14H16ClN3O4S2	Cyclothiazide;	NULL		282782	254450	256621	266892	259135	257075	267404	276074	259551
C6H10O10S	L-Iduronate 2-sulfate;	NULL		76318.2	75419.2	70662.6	74474.9	59865.6	68608.1	65893.1	65958.6	73078.6
C9H14N2O5	N1-Acetyl-tabtoxinine-beta-lactam;	map00261 Monobactam biosynthesis; map01130 Biosynthesis of antibiotics		52256.6	38361.7	50285.6	54717.9	80056.3	49669.1	63577.2	52602.7	49402.1
C10H14N5O7PS	6-Thioguanosine monophosphate;	map00983 Drug metabolism - other enzymes		1975.48	723.858	1517.08	5980.83	36753.1	68351.3	6714.74	7488.55	31684.2
C4H6O4	Succinate; Succinic acid; Butanedionic acid; Ethylenesuccinic acid;	map00020 Citrate cycle (TCA cycle); map00190 Oxidative phosphorylation; map00250 Alanine, aspartate and glutamate metabolism; map00310 Lysine degradation; map00350 Tyrosine metabolism; map00360 Phenylalanine metabolism; map00361 Chlorocyclohexane and chlorobenzene degradation; map00620 Pyruvate metabolism; map00630 Glyoxylate and dicarboxylate metabolism; map00640 Propanoate metabolism; map00650 …		30910.7	33466.8	26451.9	28454.3	19744.7	28203.9	24923.8	26664.4	25133.6
C8H13NO4	6-Acetamido-2-oxohexanoate; 2-Oxo-6-acetamidocaproate;	map00310 Lysine degradation		17288.6	6472.86	4447.44	21625.1	12751.1	7886.99	14973.6	19408.6	16635.8
C9H12N3O7P	2',3'-Cyclic CMP;	map00240 Pyrimidine metabolism		18942.7	14640.6	15205.7	22968.8	23130.9	22284.1	19514.6	18443.4	24948.6
C14H14O	4-Phenethylphenol; 4-(2-Phenylethyl)phenol;	NULL		67831.3	65459.4	59210.1	69982.4	63262.5	70200.7	66134	65690.8	68383.7
C4H10O4	Erythritol; Erythrol; Phycitol; Phycite; Erythrite;	map02010 ABC transporters		7235.56	7179.76	6884.57	6831.36	15037.1	21778.2	6350.04	8943.39	13287.7
C9H18O8	3-beta-D-Galactosyl-sn-glycerol; Galactosylglycerol;	map00052 Galactose metabolism; map00561 Glycerolipid metabolism		4890.48	2654.31	407.068	7812.56	118535	191144	7878.42	19969.1	78925.7
C12H14N4O2S	Sulfamethazine;	NULL		9252.16	3426.26	6035.16	11807.9	13303.5	7160.89	3673.17	7377.27	11001.2
C8H11Cl2NO	Dichlormid;	NULL		329.058	243.924	197.995	324.188	2349.28	6056.11	244.308	398.081	2775.66
C16H8N2O4	1,8-Dinitropyrene;	NULL		684.597	657.349	1330.02	5930.29	43374.4	57414.6	5622.06	12664.1	36474
C9H12FN2O8P	5-Fluorodeoxyuridine monophosphate;	map00983 Drug metabolism - other enzymes		1206.16	789.338	1871.75	15220.2	133892	178468	16068.2	36341.1	89866.6
C6H15NO3	Triethanolamine; Trolamine;	map00564 Glycerophospholipid metabolism		536588	307817	457352	593988	673766	607329	662936	586034	956921
C7H11NO5	N-Acetyl-L-glutamate; N-Acetyl-L-glutamic acid;	map00220 Arginine biosynthesis; map01100 Metabolic pathways; map01110 Biosynthesis of secondary metabolites; map01130 Biosynthesis of antibiotics; map01210 2-Oxocarboxylic acid metabolism; map01230 Biosynthesis of amino acids		68574.3	15770.1	19328.7	70548	115995	102333	87398	25278.6	23556.8
C10H4Cl2FNO2	Fluoroimide;	NULL		61621.8	60494.7	76530.9	53397.8	47836.2	54369.3	49086.7	50274.6	64331.2
C12H18O7S	12-Sulfooxyjasmonate; 12-Hydroxyjasmonate sulfate;	NULL		6073.17	2642.47	9099.75	7138.92	9755.28	9976.8	6506.86	5339.68	16745.5
C12H7Cl2NO3	Nitrofen;	NULL		95652.3	69027	95605.2	100781	100047	89717.7	97584.6	87611.2	116901
C16H24NO5+	Sinapine; Sinapoylcholine;	map00940 Phenylpropanoid biosynthesis		13948	4407.61	15471.9	17049.8	18683	18557.2	22260.3	16603.1	37590.7
C14H19NO2	Methylphenidate;	NULL		12334.9	10817.7	11840.4	19882.1	18467.9	14974.8	15148.6	16202	31010.4
C8H14N3O6P	Cidofovir; Cidofovir anhydrous;	NULL		124482	83452.4	113051	133739	143722	124018	135789	127774	164733
C4H13N3O7P2	N'-Phosphoguanidinoethyl methyl phosphate;	NULL		611833	416495	575693	657737	671884	606795	632794	608880	838640
C16H13ClO6	Peonidin; 3,5,7-Trihydroxy-2-(4-hydroxy-3-methoxyphenyl)-1-benzopyrylium chloride;	NULL		43008.5	26494.2	36905.8	47478	50412	46232.5	45125	43176.8	62621.2
C16H22O7	Hinokitiol glucoside; beta-Thujaplicin 2-O-beta-D-glucoside;	NULL		171027	71620.5	187645	214491	249377	230501	236171	181749	419605
C5H10O6	D-Xylonate;	map00040 Pentose and glucuronate interconversions		141986	180814	157927	142554	160814	256691	163665	162885	218717
C6H13NO2	L-Isoleucine; 2-Amino-3-methylvaleric acid;	map00280 Valine, leucine and isoleucine degradation; map00290 Valine, leucine and isoleucine biosynthesis; map00460 Cyanoamino acid metabolism; map00960 Tropane, piperidine and pyridine alkaloid biosynthesis; map00966 Glucosinolate biosynthesis; map00970 Aminoacyl-tRNA biosynthesis; map01060 Biosynthesis of plant secondary metabolites; map01064 Biosynthesis of alkaloids derived from ornithine, ly…		901172	506530	769381	1.04707e+06	1.06528e+06	958775	1.06849e+06	979737	1.34969e+06
C5H8	Isoprene; 2-Methyl-1,3-butadiene;	map00900 Terpenoid backbone biosynthesis; map01062 Biosynthesis of terpenoids and steroids; map01110 Biosynthesis of secondary metabolites		421413	229789	347346	493094	492719	436540	504854	451500	626003
C5H6N4O3	5-Ureido-4-imidazole carboxylate; 4-Ureido-5-imidazolecarboxylic acid;	map00230 Purine metabolism		6185.69	9102.08	27919.2	4297.39	2977.18	9906.2	6770.2	10990.4	16143.6
C14H8N2O8	PQQH2; Reduced pyrroloquinoline-quinone;	NULL		47695.4	20573.1	12361.7	47226.5	64595.5	52568.9	56462.3	50332.9	69275.8
C6H11NO2	L-Pipecolate; Pipecolinic acid; Pipecolic acid; 2-Piperidinecarboxylic acid; (S)-Piperidine-2-carboxylic acid;	map00310 Lysine degradation; map00960 Tropane, piperidine and pyridine alkaloid biosynthesis; map01060 Biosynthesis of plant secondary metabolites; map01064 Biosynthesis of alkaloids derived from ornithine, lysine and nicotinic acid; map01100 Metabolic pathways; map01110 Biosynthesis of secondary metabolites		22839.9	20738.3	18794.6	23157.5	24524.4	35846.1	20233.3	21636.7	31988.1
C9H13NO4	L-Anticapsin; Anticapsin;	map00999 Biosynthesis of secondary metabolites - unclassified; map01130 Biosynthesis of antibiotics		4.3629e+06	1.71904e+06	1.0423e+06	4.41326e+06	6.20151e+06	4.03578e+06	6.33625e+06	5.08914e+06	7.37494e+06
C9H10O4	(R)-3-(4-Hydroxyphenyl)lactate;	map00130 Ubiquinone and other terpenoid-quinone biosynthesis; map00350 Tyrosine metabolism; map01110 Biosynthesis of secondary metabolites		124303	40485.8	19401.4	125257	182454	114294	178882	144462	208966
C14H16O3	Encecalin; 1-(7-Methoxy-2,2-dimethyl-2H-1-benzopyran-6-yl)ethanone;	NULL		7374.54	6345.36	5992.36	11850	6745.21	6960.88	22529.4	8757.27	6942.3
C9H12N2O6	Uridine;	map00240 Pyrimidine metabolism; map01100 Metabolic pathways		108417	67591.8	104337	124517	164791	171070	166978	119306	166349
C9H11FN2O5	5'-Deoxy-5-fluorouridine; Doxifluridine;	map00983 Drug metabolism - other enzymes		37007.3	20441.9	30284.1	41121.5	50741.5	48001.7	56555.4	39942.2	52082.6
C14H24O12	Acetyl-maltose; 6-O-Acetyl-alpha-D-glucopyranosyl-(1->4)-D-glucose;	NULL		41298	3730.38	12061.6	46547.9	92272.7	48696.6	117556	57702.5	136198
C19H21N7O6	Dihydrofolate; Dihydrofolic acid; 7,8-Dihydrofolate; 7,8-Dihydrofolic acid; 7,8-Dihydropteroylglutamate;	map00670 One carbon pool by folate; map00790 Folate biosynthesis; map01061 Biosynthesis of phenylpropanoids; map01100 Metabolic pathways; map01523 Antifolate resistance		17393.7	5980.82	2652.51	22391.2	34429.6	21976.6	50317.9	23325.3	38754.8
C18H16N2	N,N'-Diphenyl-p-phenylenediamine; DPPD;	NULL		14312.9	10130.8	8313.88	15942	13842.3	15701.7	17157.9	17642.3	31095.4
C7H8O	Anisole; Methoxybenzene; Methyl phenyl ether; Phenol methyl ether;	NULL		319838	132607	87473.9	316593	412340	289282	393934	361908	611721
C9H8O3	cis-2-Hydroxycinnamate; 2-Coumarinate;	map00940 Phenylpropanoid biosynthesis; map01110 Biosynthesis of secondary metabolites		1.45665e+07	5.48195e+06	3.16548e+06	1.57768e+07	1.98848e+07	1.23821e+07	1.91068e+07	1.81155e+07	2.21007e+07
C11H17NO3	Mescaline;	map01063 Biosynthesis of alkaloids derived from shikimate pathway		368306	325216	388213	486814	404917	412695	443288	357912	450936
C10H15NO3	L-Metanephrine;	map00350 Tyrosine metabolism; map01100 Metabolic pathways		795.712	4329.03	3717.24	383.596	4720.34	97615.4	734.652	2059.23	481.922
C12H16N2O3	Carbetamide;	NULL		6789.84	1462.44	961.765	14054.2	4904.5	7638.78	10465.5	4147.87	4271.54
C5H15NO3P+	N-Trimethyl-2-aminoethylphosphonate; 2-Trimethylaminoethylphosphonate;	map00440 Phosphonate and phosphinate metabolism; map01100 Metabolic pathways		1112.17	750.402	1466.27	1072.83	1195.13	28670.4	1909.28	844.338	1272.67
C9H10O2	Phenylpropanoate; 3-Phenyl-propionic acid; 3-Phenylpropanoic acid; 3-Phenylpropionic acid;	map00360 Phenylalanine metabolism; map01120 Microbial metabolism in diverse environments; map01220 Degradation of aromatic compounds		3831.81	6166.54	7675.03	3863.76	6878.45	46182	4327.06	4216.43	4539.53
C10H10O2	trans-2-Phenylcyclopropanecarboxylic acid;	NULL		8448.26	62043.3	69565	10504.5	85663.7	1.29338e+06	9014.06	11506.6	22568.4
C11H14N2O4S	S-(Hydroxyphenylacetothiohydroximoyl)-L-cysteine;	map00966 Glucosinolate biosynthesis; map01210 2-Oxocarboxylic acid metabolism		3416.07	742.579	5034.25	36056.3	138579	151036	32034.4	88290.8	165422
C7H15N3O3	L-Homocitrulline;	NULL		1618.13	4939.73	2562.45	1492.1	24780.1	31865.4	596.727	9601.76	38651.4
C6H4Cl4	1,3,4,6-Tetrachloro-1,4-cyclohexadiene;	map00361 Chlorocyclohexane and chlorobenzene degradation; map01100 Metabolic pathways; map01120 Microbial metabolism in diverse environments		225055	215780	237698	226859	172803	161849	230842	196970	208323
C8H10O2	4-Hydroxyphenylethanol; Tyrosol;	map00350 Tyrosine metabolism		95571.6	313656	36486	84044.8	518168	782304	102043	89756.4	184946
C9H11FN2O5	5-Fluorodeoxyuridine; Floxuridine;	map00983 Drug metabolism - other enzymes		18578.7	16270.5	26276	24511	26370.1	32235.2	27395.6	21855.4	22164.6
C10H16NO3PS	Aminoparathion;	map00627 Aminobenzoate degradation		12456.5	11141.2	15718.1	15845.6	16385.3	24980.7	19241.1	13061.8	13796
C8H13NO6	O-Succinyl-L-homoserine; O4-Succinyl-L-homoserine; O-Succinylhomoserine;	map00270 Cysteine and methionine metabolism; map00920 Sulfur metabolism; map01100 Metabolic pathways; map01110 Biosynthesis of secondary metabolites; map01230 Biosynthesis of amino acids		36372.6	30187.7	39999.2	40061.4	32831.5	38716	47595.7	39274.9	29517.3
C13H7Br2N3O6	Bromofenoxim;	NULL		84574.4	97182.5	90808.5	72726.2	79243.3	87255.2	70605.2	87685.1	55953.1
C4H6N2O3	Ureidoacrylate; (Z)-3-Ureidoacrylate;	map00240 Pyrimidine metabolism		243773	173091	303242	255429	203088	213739	252245	239763	258619
C14H7ClF3NO5	Acifluorfen; 5-[2-Chloro-4-(trifluoromethyl)phenoxy]-2-nitrobenzoic acid;	NULL		15583	8089.79	19873.9	14822	8834.64	9060.6	17562.6	10863.6	12095.9
C27H44O6	3-Epiecdysone;	map00981 Insect hormone biosynthesis		325953	309186	304190	263927	214025	172533	226655	267649	196620
C7H13NO4	Calystegin B2; Calystegine B2;	NULL		46403.3	59714	41406.2	41026.2	43990.7	61361.8	45573.9	40162.2	48002.8
C20H36O.[C5H8]n	Dolichol;	map00510 N-Glycan biosynthesis; map01062 Biosynthesis of terpenoids and steroids; map01100 Metabolic pathways		258318	308655	225911	210536	196354	178527	243233	376027	182776
C4H7O7P	Phosphoenol-4-deoxy-3-tetrulosonate;	NULL		267503	244497	253701	252892	204934	185215	251497	225477	243800
C7H10O7	(R)-2-Hydroxybutane-1,2,4-tricarboxylate; Homocitrate; Homocitric acid; 3-Hydroxy-3-carboxyadipic acid; (R)-2-Hydroxy-1,2,4-butanetricarboxylic acid;	map00300 Lysine biosynthesis; map00620 Pyruvate metabolism; map01100 Metabolic pathways; map01120 Microbial metabolism in diverse environments; map01130 Biosynthesis of antibiotics; map01210 2-Oxocarboxylic acid metabolism; map01230 Biosynthesis of amino acids		27056.9	34676	28478.1	22253.6	26200.9	39467.1	25607.8	28137.3	26705.4
C11H15N4O6+	7-Methylxanthosine;	map00232 Caffeine metabolism; map01100 Metabolic pathways; map01110 Biosynthesis of secondary metabolites		99620.6	26475.8	5193.76	117585	34043.2	23953	118173	85173	84596.8
C5H10O3	3-Hydroxyisovalerate; 3-Hydroxy-3-methylbutyrate;	map00280 Valine, leucine and isoleucine degradation		14766.4	15980.8	26837.8	15681.5	29753.7	38918.4	16741.3	19358.2	27933.1
C12H3Cl5O	1,2,3,7,8-Pentachlorodibenzofuran; 1,2,3,7,8-PeCDF; PCDF 94;	map00621 Dioxin degradation		170608	159385	165092	160427	89600.6	83012.6	167115	152492	140884
C7H6O5S	4-Sulfobenzoate; 4-Sulfobenzoic acid;	map00623 Toluene degradation; map01120 Microbial metabolism in diverse environments; map01220 Degradation of aromatic compounds		1325.83	1950.5	2023.21	2074.22	328465	477762	1545.36	51396.4	132313
C4H7NaO3S	Sodium methallylsulfonate; Sodium methallyl sulfonate;	NULL		61.3035	488.97	217.213	926.003	10897.4	16019.5	558.539	1288.35	4114.33
C15H9NO3	7-Methylpyrido[3,4-c]psoralen;	NULL		504.64	890.727	1106.85	514.374	9656.54	15432.6	310.549	306.333	3043.01
C11H18N2O4S	2,3-Dihydrothienamycin;	map00332 Carbapenem biosynthesis; map01130 Biosynthesis of antibiotics		1147.11	1618.9	773.08	1483.58	33032.2	72705.3	3886.77	1669.83	5504.91
C9H10N2O6	5'-Dehydrouridine; Uridine-5'-aldehyde;	NULL		2444.36	821.503	530.596	505.83	88135.5	122789	330.557	11975.3	36647.8
C18H24O4S	Steroid O-sulfate; Phenolic steroid O-sulfate;	NULL		80.7399	18.1697	60.4921	54.3642	19246.7	41335.3	74.177	216.619	1976.65
C12H16NO9P	1-(2-Carboxyphenylamino)-1-deoxy-D-ribulose 5-phosphate;	map00400 Phenylalanine, tyrosine and tryptophan biosynthesis; map01100 Metabolic pathways; map01110 Biosynthesis of secondary metabolites; map01130 Biosynthesis of antibiotics; map01230 Biosynthesis of amino acids		40.9381	83.7731	63.4144	113.713	26554.5	53248.2	87.2579	133.24	2370.8
C6H12O4	(R)-2,3-Dihydroxy-3-methylpentanoate; (R)-2,3-Dihydroxy-3-methylvalerate; (2R,3R)-2,3-Dihydroxy-3-methylpentanoate;	map00290 Valine, leucine and isoleucine biosynthesis; map01100 Metabolic pathways; map01110 Biosynthesis of secondary metabolites; map01130 Biosynthesis of antibiotics; map01210 2-Oxocarboxylic acid metabolism; map01230 Biosynthesis of amino acids		538.286	501.163	619.115	651.998	111102	175255	590.123	10570.3	34431.9
C14H16ClN3O2	Triadimefon;	NULL		4293.77	9285	10143	5083.76	77729.2	150797	5770.27	4460.96	15346
C16H18N2O4S	Penicillin G; Benzylpenicillin;	map01130 Biosynthesis of antibiotics; map04976 Bile secretion		23178.1	21246.6	18913.1	22056.2	126341	238555	23320.5	22015.6	40118.6
C3H7NO4Se	Selenocysteine seleninic acid; Selenocysteine seleninate; 3-Seleninoalanine;	NULL		1.23961e+06	1.15847e+06	1.26929e+06	1.18344e+06	1.13914e+06	1.14095e+06	1.19146e+06	1.09553e+06	1.30866e+06
C6H14N2O4	Streptamine;	map01130 Biosynthesis of antibiotics		454.626	523.767	421.671	476.573	7629.45	9958.67	699.198	1739.05	3647.92
C12H15NO3	Metaxalone;	NULL		71880.1	68267.5	66892.2	65510.3	66911.2	63351.2	68625.2	69540.1	69415.8
C12H17NO3	Anhalonidine;	map01063 Biosynthesis of alkaloids derived from shikimate pathway		1.499e+06	1.42686e+06	1.361e+06	1.42671e+06	1.40642e+06	1.31937e+06	1.47021e+06	1.47711e+06	1.4186e+06
C17H9NO3	Liriodenine; Oxoushinsunine;	NULL		10977.1	8425.02	6312.12	9577.84	10911.6	8338.78	10062.2	9055.47	10948.6
C12H17N2O4P	Psilocybin; Psilocybine;	map00901 Indole alkaloid biosynthesis; map01063 Biosynthesis of alkaloids derived from shikimate pathway; map01110 Biosynthesis of secondary metabolites		2.99814e+06	3.21396e+06	2.43493e+06	2.97961e+06	1.86949e+06	1.48462e+06	3.08163e+06	2.58292e+06	2.36358e+06
C14H19N2O7P	N1-(5-Phospho-alpha-D-ribosyl)-5,6-dimethylbenzimidazole; alpha-Ribazole 5'-phosphate;	map00860 Porphyrin and chlorophyll metabolism; map01100 Metabolic pathways		34383.4	25979.6	18128.4	31734.9	26990.2	24138.5	28595.5	25587.2	39865.7
C15H19N3O4	Imazamox;	NULL		8819.32	5175.72	5238.52	10478.6	7305.12	7459.47	9610.54	7737.19	8714.5
C11H17NO3	Isoproterenol; Isoprenaline;	map04261 Adrenergic signaling in cardiomyocytes		162601	139234	168045	186395	157852	163825	175125	141171	197141
C13H18N5O8P	Propionyladenylate; Propionyl-adenosine monophosphate;	map00640 Propanoate metabolism		25033.3	6733.49	6275.42	14197.6	17357.9	9508.81	20481	9383.72	12708.3
C23H36N4O20P2	UDP-N-acetylmuramoyl-L-alanine; UDP-N-acetyl-alpha-D-muramoyl-L-alanine;	map00471 D-Glutamine and D-glutamate metabolism; map00550 Peptidoglycan biosynthesis; map01100 Metabolic pathways		84014.7	135092	165972	69481	68257.4	67204.1	69464.1	68822.1	65179.2
C6H15N	Hexylamine; 1-Hexanamine;	NULL		45673.7	44234.3	44864.8	43378.7	41797	39959.3	45660.9	45273.6	43961.2
C20H18O2	trans-5,6-Dihydro-5,6-dihydroxy-7,12-dimethylbenz[a]anthracene; trans-DMBA-5,6-dihydrodiol;	map00980 Metabolism of xenobiotics by cytochrome P450		60264.1	59625.7	53080.3	77001.1	66241.1	66331.2	66079.7	56017.4	70894.4
C13H19N4O12P	1-(5'-Phosphoribosyl)-5-amino-4-(N-succinocarboxamide)-imidazole; 1-(5'-Phosphoribosyl)-4-(N-succinocarboxamide)-5-aminoimidazole; 5'-Phosphoribosyl-4-(N-succinocarboxamide)-5-aminoimidazole; (S)-2-[5-Amino-1-(5-phospho-D-ribosyl)imidazole-4-carboxamido]succinate; SAICAR;	map00230 Purine metabolism; map01100 Metabolic pathways; map01110 Biosynthesis of secondary metabolites; map01130 Biosynthesis of antibiotics		46363.1	40144.6	11903.4	85341.2	44789	30585.6	119338	46680.9	46656.9
C6H10O4	(S)-2-Aceto-2-hydroxybutanoate; (S)-2-Hydroxy-2-ethyl-3-oxobutanoate;	map00290 Valine, leucine and isoleucine biosynthesis; map01100 Metabolic pathways; map01110 Biosynthesis of secondary metabolites; map01130 Biosynthesis of antibiotics; map01210 2-Oxocarboxylic acid metabolism; map01230 Biosynthesis of amino acids		5264.66	18450.6	30914.9	43070.7	1.29787e+06	815178	26670.8	414987	792624
C9H11NO3	L-Tyrosine; (S)-3-(p-Hydroxyphenyl)alanine; (S)-2-Amino-3-(p-hydroxyphenyl)propionic acid; Tyrosine;	map00130 Ubiquinone and other terpenoid-quinone biosynthesis; map00231 Puromycin biosynthesis; map00261 Monobactam biosynthesis; map00350 Tyrosine metabolism; map00360 Phenylalanine metabolism; map00400 Phenylalanine, tyrosine and tryptophan biosynthesis; map00401 Novobiocin biosynthesis; map00460 Cyanoamino acid metabolism; map00680 Methane metabolism; map00730 Thiamine metabolism; map00940 Phen…		16687.2	18576.5	34353.6	17162.3	12384.6	15477.1	14506.9	20859.3	17538.5
C8H13NO5	N2-Acetyl-L-aminoadipate;	NULL		61095.9	64276.9	54242.9	47459.1	42202.5	76379.2	47442.3	56523.5	51302
C9H10O6	2-Hydroxy-6-oxonona-2,4-diene-1,9-dioate; (2Z,4E)-2-Hydroxy-6-oxonona-2,4-diene-1,9-dioate;	map00360 Phenylalanine metabolism; map01120 Microbial metabolism in diverse environments; map01220 Degradation of aromatic compounds		17565.3	18014.6	17752.1	20189.6	70164	52878.7	18074.1	40763.4	53894
C11H7BrN2	Eudistomin N;	NULL		2147.25	4483.04	4259.45	5876.23	101019	94833.5	3184.53	42430.1	76160
C19H20F3NO4	Fluazifop butyl;	NULL		9164.43	17209.2	11467.4	16762.6	29618	37597.8	21581.2	42303.3	83642.4
C21H16O7	Tetracenomycin F1 methylester;	map01057 Biosynthesis of type II polyketide products; map01130 Biosynthesis of antibiotics		91516.8	62809.5	41863.2	96542	197795	302323	89430	70141.5	115099
C22H28N7O9P	N-Acetyl-N6,O-didemethylpuromycin-5'-phosphate;	map00231 Puromycin biosynthesis; map01130 Biosynthesis of antibiotics		27384.5	26785.9	21605.4	32673.1	31084.4	32134	29944.5	26272.8	26330
C17H31O18P	3-O-(6-O-alpha-D-Xylosylphospho-alpha-D-mannopyranosyl)-alpha-D-mannopyranose;	NULL		205473	385552	52260.1	360853	311013	256699	307742	398269	323155
C5H7N5O	4,6-Diamino-5-formamidopyrimidine; 4,6-Diamino-5-N-formamidopyrimidine;	NULL		559206	705126	525639	476953	461708	435574	535871	589892	381729
C8H12O5	2-Oxosuberate; 2-Oxooctanedionic acid; alpha-Ketosuberate;	map00680 Methane metabolism; map01120 Microbial metabolism in diverse environments; map01210 2-Oxocarboxylic acid metabolism		10560.4	1789.48	2849.39	3108.66	2706.16	3609.8	6571.13	7396.38	3374.96
Ra	Radium-226;	NULL		18148.2	19265	26198.3	14250.1	17775.8	23125	13395.4	8810.13	17827.4
C9H12N2O6	Pseudouridine;	map00240 Pyrimidine metabolism		10213.6	11398.8	15383.1	8646.56	10748.2	13185.3	8853.83	5285.53	9808.68
C13H13NO4	N-(4-Coumaroyl)-L-homoserine lactone;	map02024 Quorum sensing		11490.4	78646.3	3901.95	14332.8	88348.3	95700.3	17037.3	6865.3	19880
C11H11Cl2NO2	Benoxacor;	NULL		5340.32	6157.6	5043.52	5803.61	34220.4	24016.2	5624.32	15773.9	25875.7
C9H17NO8	Neuraminic acid; 5-Amino-3,5-dideoxy-D-glycero-D-galacto-2-nonulosonic acid;	NULL		2.14452e+06	2.68741e+06	1.99716e+06	1.79815e+06	1.75063e+06	1.59208e+06	2.04788e+06	2.28175e+06	1.44912e+06
C13H19ClNO3PS2	Anilofos;	NULL		84902.2	106132	86399.6	77647.7	66878.7	67820	85013	97606.3	66154.7
C21H19NO4	2-(Biaryl)carbapenems;	NULL		29164.4	19379.2	11739.3	35032.6	39279.9	33170.6	35845.7	26005.5	36470.9
C23H29FO6	9alpha-Fluoro-11beta,17alpha,21-trihydroxypregna-1,4-diene-3,20-dione 21-acetate; Isoflupredone acetate; U-6013;	NULL		8483.77	36778.2	4806.17	9978.63	55626.9	57925.1	11483.8	3539.77	16071.8
C10H13N5O4	Adenosine;	map00230 Purine metabolism; map01100 Metabolic pathways; map04022 cGMP-PKG signaling pathway; map04024 cAMP signaling pathway; map04071 Sphingolipid signaling pathway; map04080 Neuroactive ligand-receptor interaction; map04270 Vascular smooth muscle contraction; map04923 Regulation of lipolysis in adipocytes; map04924 Renin secretion; map05012 Parkinson disease; map05032 Morphine addiction; map05…		1.66976e+07	2.01744e+07	1.59227e+07	1.46646e+07	1.62129e+07	1.29502e+07	1.61895e+07	1.76559e+07	1.36711e+07
C2H6O2	Ethylene glycol; 1,2-Ethanediol; Ethane-1,2-diol;	map00625 Chloroalkane and chloroalkene degradation; map00630 Glyoxylate and dicarboxylate metabolism; map01100 Metabolic pathways; map01120 Microbial metabolism in diverse environments		10526.4	15646.1	8995.91	7860.82	9255.12	8672.53	9050.89	10949.9	4460.03
C7H8O5	3-Dehydroshikimate;	map00400 Phenylalanine, tyrosine and tryptophan biosynthesis; map01060 Biosynthesis of plant secondary metabolites; map01061 Biosynthesis of phenylpropanoids; map01063 Biosynthesis of alkaloids derived from shikimate pathway; map01100 Metabolic pathways; map01110 Biosynthesis of secondary metabolites; map01130 Biosynthesis of antibiotics; map01230 Biosynthesis of amino acids		124799	22111.5	3298.14	86515.9	73593	20560.4	92134.2	40378	55074.1
C8H10N2O5	(S)-ACPA; (S)-2-Amino-3-(3-carboxy-5-methyl-4-isoxazolyl)porionic acid;	NULL		28519.8	30420.7	25148.3	27912.3	54344.9	55376.7	30199.9	36986	49656.7
C11H17NO7	Cardiospermin;	NULL		47038.4	54464.3	36671.4	49991.9	48092.8	60709.1	55829.7	45227.9	45810.9
C10H15N2O9P	1-(5-Phosphoribosyl)imidazole-4-acetate;	map00340 Histidine metabolism		5.43632e+06	7.10156e+06	7.2972e+06	4.06673e+06	4.96293e+06	7.25652e+06	4.59839e+06	2.4458e+06	3.46694e+06
C15H27O4P	trans,trans-Farnesyl phosphate; Farnesyl phosphate; (2E,6E)-Farnesyl phosphate;	map00900 Terpenoid backbone biosynthesis; map01130 Biosynthesis of antibiotics		10978.3	26434.5	23889.8	7375.36	11378.7	23797	9056.06	4256.58	8844.11
C10H14N5O7P	Adenosine 2'-phosphate; 2'-Adenylic acid; Adenosine-2'-monophosphate; AMP 2'-phosphate;	NULL		91393.3	83407.5	87210.6	105800	120264	114087	110861	99718.5	100702
C14H13N8NaO4S3	Cefazolin sodium; Cefazolin sodium salt;	NULL		3995.41	7565.49	11584.8	4424.2	1972.22	7186.71	4023.02	3791.56	3385.34
C24H29N4O15P	Coenzyme F420-1;	map00680 Methane metabolism; map01120 Microbial metabolism in diverse environments		186523	44149	16451	155397	239483	59763.3	195982	98552.6	159574
C24H26N2O16S	Prebetanin;	NULL		245783	308274	222096	168758	271780	334276	205594	111510	155936
C5H10O4	Deoxyribose; 2-Deoxy-D-erythro-pentose; Thyminose; 2-Deoxy-D-ribose;	map00030 Pentose phosphate pathway		302.044	293.6	1066.45	169.823	147.748	330.843	306.362	8267.99	10114.5
C13H10O4	2-Hydroxy-4-(1-oxo-1,3-dihydro-2H-inden-2-ylidene)-but-2-enoic acid;	map00624 Polycyclic aromatic hydrocarbon degradation; map01120 Microbial metabolism in diverse environments		42343.6	47840.8	28244.5	60919.6	71762.6	62838.7	55603.2	49546.7	57207
C20H19F3N2O4	Trifloxystrobin;	NULL		81242.2	73799.9	56068.3	84405.7	78750.6	73716.4	101366	76877.8	84331.7
C10H15N5O9P2S	Adenosine 5-O-(3-thiodiphophate); ADP-gamma-S;	NULL		28201.1	38113.9	41805.8	18927.4	21054.5	38273.1	23186.1	18890.2	19037.3
C7H7NO3	4-Nitroanisole; p-Nitroanisole;	NULL		242320	260824	279350	273635	222601	228015	229162	212143	234596
C11H12O2	Lachnophyllum ester; 2-Decene-4,6-diynoic acid, methyl ester, (E)-;	NULL		1.26997e+06	1.23979e+06	1.22656e+06	1.1813e+06	1.1584e+06	1.13258e+06	1.20967e+06	1.20548e+06	1.17016e+06
C17H11N	Benz[a]acridine;	NULL		26856.6	24911.7	28231.1	31312.2	32972.8	36623.3	33728.2	24815.4	46032.2
C9H18NO8P	D-4'-Phosphopantothenate; (R)-4'-Phosphopantothenate;	map00410 beta-Alanine metabolism; map00770 Pantothenate and CoA biosynthesis; map01100 Metabolic pathways		33293.3	68182.9	52526.2	32445.1	62062.6	57460.5	26179.2	31676.9	32065.9
C40H30Cl2N10O6	Nitro blue tetrazolium;	NULL		179867	47935.9	15410.8	169650	282552	96857.2	241549	86277	147489
C6H8O7	Citrate; Citric acid; 2-Hydroxy-1,2,3-propanetricarboxylic acid; 2-Hydroxytricarballylic acid;	map00020 Citrate cycle (TCA cycle); map00250 Alanine, aspartate and glutamate metabolism; map00630 Glyoxylate and dicarboxylate metabolism; map00720 Carbon fixation pathways in prokaryotes; map01060 Biosynthesis of plant secondary metabolites; map01061 Biosynthesis of phenylpropanoids; map01062 Biosynthesis of terpenoids and steroids; map01063 Biosynthesis of alkaloids derived from shikimate path…		167781	172957	102249	152531	148982	175027	134693	164531	107099
C15H16O9	Sinapoyl malate; Sinapoyl-(S)-malate;	map00940 Phenylpropanoid biosynthesis		113903	67982	48143.2	137974	132751	79092.2	109252	78180.3	143781
C11H19NO10	N-Glycoloyl-neuraminate; N-Glycolylneuraminate; Neu5Gc;	map00520 Amino sugar and nucleotide sugar metabolism		4.70717e+06	7.45062e+06	5.18212e+06	5.138e+06	7.52516e+06	9.71745e+06	5.20588e+06	4.02095e+06	4.65146e+06
C24H38O20	beta-D-4-Deoxy-Delta4-GlcA-(1->4)-beta-D-Glc-(1->4)-alpha-L-Rha-(1->3)-D-Glc; beta-D-4-Deoxy-Delta4-GlcAp-(1->4)-beta-D-Glcp-(1->4)-alpha-L-Rhap-(1->3)-D-Glcp;	NULL		334725	177189	362020	610894	655753	511892	573036	374394	533851
C21H31N7O15P2	(6S)-6beta-Hydroxy-1,4,5,6-tetrahydronicotinamide-adenine dinucleotide; (S)-NADH-hydrate; (S)-NADHX; (6S)-6-Hydroxy-1,4,5,6-tetrahydronicotinamide-adenine dinucleotide; 6beta-Hydroxy-1,4,5,6-tetrahydronicotinamide-adenine dinucleotide;	NULL		110618	57493.5	35605.2	119557	122787	62759.4	133055	79324.9	86975
C27H32N8O15P2	Isonicotinoyl-NAD adduct; INH-NAD adduct;	map00983 Drug metabolism - other enzymes		35271.7	33325.4	16052.6	40355.3	58243.6	48072.8	52624.5	26743	36939.4
C5H4N4O	Hypoxanthine; Purine-6-ol;	map00230 Purine metabolism; map01100 Metabolic pathways		2668.98	3053.79	7601.85	3369.17	793.82	1344.36	2293.15	1632.26	1692.02
C3H7NO3	L-Serine; L-2-Amino-3-hydroxypropionic acid; L-3-Hydroxy-alanine; Serine;	map00260 Glycine, serine and threonine metabolism; map00261 Monobactam biosynthesis; map00270 Cysteine and methionine metabolism; map00460 Cyanoamino acid metabolism; map00600 Sphingolipid metabolism; map00630 Glyoxylate and dicarboxylate metabolism; map00680 Methane metabolism; map00920 Sulfur metabolism; map00970 Aminoacyl-tRNA biosynthesis; map00999 Biosynthesis of secondary metabolites - uncl…		26373.8	32701.3	39385	24176.9	36335.8	39684.2	28241.2	32923.3	30789.4
C6H15O4P	Diisopropyl phosphate;	NULL		11037	15858.5	13435.1	11759.2	14835	18729	11249.5	8964.59	12906.3
C9H16O9	3-Deoxy-D-glycero-D-galacto-non-2-ulosonic acid; 2-Keto-3-deoxy-D-glycero-D-galacto-nononic acid; KDN; Deaminated neuraminic acid; Ketodeoxynonulonic acid; 3-Deoxy-D-glycero-D-galacto-non-2-ulopyranosonic acid;	NULL		220664	251323	568924	297110	92182.3	99167.6	203047	175247	134856
C10H19O4P	Geranyl phosphate;	map00902 Monoterpenoid biosynthesis; map01110 Biosynthesis of secondary metabolites		12125	7944.82	11773.4	15633.4	10002.6	5877.88	15190.1	7784.46	8992.42
C8H15NO7	8-Amino-3,8-dideoxy-D-manno-octulosonate; Kdo8N;	NULL		722181	863679	1.07461e+06	666606	892891	1.09742e+06	782655	898851	913437
C12H23N3O7	6'-Dehydro-6'-oxoparomamine; 6'-Dehydroparomamine; 6'-Oxoparomamine;	map00524 Neomycin, kanamycin and gentamicin biosynthesis; map01130 Biosynthesis of antibiotics		48737.2	37419.3	38252	63740	48298.7	52953.4	59225.4	48280.6	50669.9
C15H16N4O6	Musca-aurin-VII; Muscaaurin VII;	NULL		202292	214886	198990	186650	206110	199270	218462	232370	188506
C11H22N3O6P	Bialaphos; Bilanafos; 2-Amino-4-(methylphosphino)butyrylalanylalanine; gamma-(Hydroxymethylphosphinyl)-L-alpha-aminobutyryl-L-alanyl-L-alanine; Phosphinothricin tripeptide;	map00440 Phosphonate and phosphinate metabolism; map01130 Biosynthesis of antibiotics		3.59026e+06	5.05174e+06	4.08736e+06	3.91866e+06	5.81746e+06	6.8358e+06	3.46777e+06	2.60217e+06	4.16657e+06
C20H19ClN3	Magenta; Fuchsin; Rosaniline hydrochloride;	NULL		296061	285455	257948	316264	294953	294423	352952	268134	297036
C12H21N3O5S3	Brinzolamide;	NULL		278418	349139	324759	299984	372916	419711	307891	264507	306587
C22H19NO6	Dihydromacarpine; 13,14-Dihydro-5,7-dimethoxy-13-methyl-[1,3]benzodioxolo[5,6-c]-1,3-dioxolo[4,5-i]phenanthridine;	map00950 Isoquinoline alkaloid biosynthesis; map01100 Metabolic pathways; map01110 Biosynthesis of secondary metabolites		3903.31	60113.1	5594.37	4616.04	8923.55	22772.7	4344.22	3777.78	4893.78
C17H22BrNOS2	Timepidium bromide; Timepidium bromide anhydrous;	NULL		126556	150570	122697	157777	178857	191977	158175	126938	163782
C5H5N5O	Guanine; 2-Amino-6-hydroxypurine;	map00230 Purine metabolism; map01100 Metabolic pathways		828975	939291	1.31136e+06	774469	994914	1.14429e+06	814811	947732	1.21617e+06
C10H10N4O5	5'-Oxoinosine; 5'-Dehydroinosine;	NULL		319208	351051	511244	295702	389804	445959	314698	371546	493636
C15H23NO4	Cycloheximide;	NULL		50508.7	33728.2	37527.3	64288.8	47274.5	48254	53123.3	44026.9	54665.3
C17H23NO4	Cetraxate;	NULL		26799.8	20906.9	24707.5	22939.3	25014.1	36617.4	23693.9	20117.5	37711.5
C16H15F2N3Si	Flusilazole;	NULL		33202.3	43396.6	56936.6	37319.1	46791.5	56998.6	41943.9	46867.4	49002.3
C3H8NO4P	Fosamine;	NULL		5482.06	6777.57	5176.68	4606.03	6440.76	7032.84	5643.41	5793.16	6851.54
C10H17N7O8S	Gonyautoxin 2;	NULL		61832.6	76694.4	86679.2	58367.2	81559.5	112262	57886.2	51335.9	101570
C8H5NO	Benzoyl cyanide; Benzoyl nitrile;	NULL		9402.61	6195.47	7925.04	7896.64	9440.3	7463.91	9758.29	7371.75	7748.96
C9H10N2	Dimethylbenzimidazole; 5,6-Dimethylbenzimidazole;	map00740 Riboflavin metabolism; map00860 Porphyrin and chlorophyll metabolism; map01100 Metabolic pathways		22501.6	21626	28717.2	20536.6	20831.9	24282.3	21386.9	21527	23664.5
Ra	Radium-224;	NULL		38003.8	34082.7	46448.8	37381.3	38571.8	68110.3	36393	34004.5	33078.1
C14H18O3	Strigolactone ABC-rings;	map00906 Carotenoid biosynthesis; map01110 Biosynthesis of secondary metabolites		34288.5	23245.6	29335.8	33394.3	33861.8	37792.7	36418.1	53674.3	74239.6
C10H14N4O5	6-Hydroxyl-1,6-dihydropurine ribonucleoside; (6R)-1,6-Dihydroinosine;	NULL		26167.4	23405.8	28658.8	29831.2	26906.1	29771	28776	26848.6	28393
C15H12N2O3	2,3-Dihydroxycarbamazepine;	map00982 Drug metabolism - cytochrome P450		48692.1	36970.8	78575.1	63089.9	64606.1	56812.9	59289	40237	43747.6
C18H22Cl2NO	Phenoxybenzamine hydrochloride;	NULL		52370.6	44986.1	63600.5	69875.6	69873	55916.4	60635.7	50721.6	62660.5
C20H14O4	8-O-Methyltetrangulol;	map01057 Biosynthesis of type II polyketide products; map01130 Biosynthesis of antibiotics		99158.8	82483.4	89952	124845	128433	104065	108586	95129.8	133486
C13H18N2O5S	N-Acetylthienamycin;	map00332 Carbapenem biosynthesis; map01130 Biosynthesis of antibiotics		106412	74996.4	148398	123971	130141	110023	122749	84335.9	88824.3
C16H26N2O13P2	dTDP-beta-L-rhodinose;	NULL		34677.9	25062.8	22366.5	36350.3	34646.4	31424.6	40682	29693.6	25180.8
C10H16N6S	Cimetidine;	NULL		2.35535e+06	1.82791e+06	3.4518e+06	3.04512e+06	3.40937e+06	3.02032e+06	2.92002e+06	1.84405e+06	1.81484e+06
C14H13N3O4S2	Meloxicam;	NULL		231858	159903	306833	223194	227260	211696	234198	166059	175217
C12H15NO11P+	Pyridinium-3,5-biscarboxylic acid mononucleotide; P2CMN; Pyridin-1-ium-3,5-dicarboxylate mononucleotide; Pyridinium-3,5-biscarboxylate mononucleotide;	NULL		27009.4	24899.8	30390.3	36360.3	38173.5	32395	39198.9	32815.9	29631
C30H52O26	Amylopectin;	NULL		11906.8	36856.6	120483	8597.2	62772.7	133365	11048.9	21562.2	80187.3
C16H20O4	1-(3,4-Dihydroxyphenyl)-1-decene-3,5-dione;	map00945 Stilbenoid, diarylheptanoid and gingerol biosynthesis; map01110 Biosynthesis of secondary metabolites		44201	30592.7	46510.6	51436.2	51675.4	46680.3	49373.9	36730.7	62312.8
C12H18O7	Dikegulac; Diprogulic acid;	NULL		1.355e+06	880110	1.82123e+06	1.64218e+06	1.70553e+06	1.37706e+06	1.55271e+06	987240	1.12611e+06
C15H34BrN	Lauryltrimethylaminium bromide; Dodecyltrimethylammonium bromide; LTAB;	NULL		166014	83029.1	72190.3	45726.8	464950	296047	76695.8	59374.6	51043.4
C15H18N2O6S	(S)-N-[3-(3,4-Methylenedioxyphenyl)-2-(mercaptomethyl)-1-oxoprolyl]glycine;	NULL		120619	98213	157494	146423	148064	128012	140229	105434	119342
C28H16	Dibenzo[h,rst]pentaphene;	NULL		56585.8	61289.6	42967.4	88964.6	64033.9	66495.6	116516	80956.2	98462.7
C17H34N3O14P	5''-Phosphoribosylparomamine;	map00524 Neomycin, kanamycin and gentamicin biosynthesis; map01130 Biosynthesis of antibiotics		21399.2	15716.9	50810.1	29451.7	28790.4	29739.5	24718.5	14584.9	19362.9
C37H30O17	Epigallocatechin-(4beta->8)-epicatechin-3-O-gallate ester;	NULL		94364.8	5673.08	4524.07	4991.05	17148.9	19979.1	35657.6	23299.9	4975.03
C13H10O3	Mycosinol; (2E)-2-Hexa-2,4-diynylidene-1,6-dioxaspiro(4.4)nona-3,7-dien-9-ol;	NULL		26784.9	23981.8	24414.8	27160	49485.1	64992.4	28263.6	32439.7	43627.9
C10H10Cl2O3	2,4-DB; 4-(2,4-Dichlorophenoxy)butyric acid;	NULL		2134.36	2830.29	2429.08	1815.7	10978.1	32496.7	1901.63	4207.95	10085.6
C26H21N3O3	Oplophorus luciferin; 8-Benzyl-2-(4-hydroxybenzyl)-6-(4-hydroxyphenyl)imidazo-[1,2a]pyrazin-3(7H)-one; Coelenterazine;	NULL		45503.2	40232.8	43274.1	50481.3	45326.8	53317	49335.6	41140.3	54510
C8H9NO3	L-4-Hydroxyphenylglycine;	map00261 Monobactam biosynthesis; map01055 Biosynthesis of vancomycin group antibiotics; map01130 Biosynthesis of antibiotics		21217.4	355659	25059.4	22695.3	39028.7	95059.1	22927.5	26430.1	25114.2
C7H13NO3	5-Acetamidopentanoate;	map00310 Lysine degradation		10205.9	13603.4	11233.4	10663.5	7653.43	14271.2	11827.4	11839.6	10671.5
C16H29NO2	Allopumiliotoxin 267A;	NULL		3792.23	3425.02	556.566	1415.09	13356.7	10508.8	1734.82	1825.77	2000.88
C19H16N2	Sempervirine;	NULL		7259.26	6591.39	4759.1	8169.57	26732.1	32122.7	10572.6	9474.27	11232.5
C6H10O3	4-Methyl-2-oxopentanoate; 2-Oxoisocaproate;	map00280 Valine, leucine and isoleucine degradation; map00290 Valine, leucine and isoleucine biosynthesis; map00966 Glucosinolate biosynthesis; map01100 Metabolic pathways; map01110 Biosynthesis of secondary metabolites; map01210 2-Oxocarboxylic acid metabolism; map01230 Biosynthesis of amino acids		4459.83	5270.4	6702.38	5117.48	5173.92	6858.68	5332.37	4607.83	3969.64
C8H7NO2	3-Hydroxyindolin-2-one; 1,3-Dihydro-3-hydroxy-2H-indol-2-one; Dioxindole;	map00402 Benzoxazinoid biosynthesis; map01110 Biosynthesis of secondary metabolites		2169.89	22500.8	3768.94	2704.11	4310.07	7731.7	2644.61	2610.15	3182.02
C9H10O5	(3E)-3-[(1R,5R,6S)-5-Hydroxy-7-oxabicyclo[4.1.0]heptan-2-ylidene]-2-oxopropanoate; Epoxy-3E-H2HPP;	map00999 Biosynthesis of secondary metabolites - unclassified; map01130 Biosynthesis of antibiotics		59923.6	49626.1	65725.7	59578.4	70240	65203.6	66343.7	52866	50628.2
C14H18N2O7	Humilixanthin;	NULL		46425.4	27031.3	31244.7	43772.4	39409.8	34657.3	57206.1	36590.7	41832.9
N3-	Azide; Nitrogen ion (N3-); Azide ion; Hydrazoate;	NULL		16042.4	23301.8	27300.4	20658	20292.8	26810.1	18996.7	16840.7	12808.4
C22H22N2O8	5a,11a-Dehydrotetracycline; 12-Dehydrotetracycline;	map00253 Tetracycline biosynthesis; map01057 Biosynthesis of type II polyketide products; map01130 Biosynthesis of antibiotics		294630	136911	133650	409724	376320	217840	474755	270288	343208
C17H26N3O15P	CMP-3-deoxy-D-manno-octulosonate; CMP-KDO; CMP-beta-KDO;	map00540 Lipopolysaccharide biosynthesis; map01100 Metabolic pathways		63122.7	12008.2	20108.6	13464.7	16162.8	20272.8	31481.2	21475.3	15252.4
C14H25N3O6S	delta-(L-2-Aminoadipyl)-L-cysteinyl-D-valine; N-[L-5-Amino-5-carboxypentanoyl]-L-cysteinyl-D-valine; L-delta-(alpha-Aminoadipoyl)-L-cysteinyl-D-valine; ACV;	map00311 Penicillin and cephalosporin biosynthesis; map01100 Metabolic pathways; map01130 Biosynthesis of antibiotics		32587.4	31025.9	31077.9	45339.5	44825.5	38421.6	44050.3	33341.8	31723.3
C30H26O14	Gallocatechin-(4alpha->8)-epigallocatechin;	NULL		1.85794e+07	385601	120615	3.79334e+06	8.71128e+06	868945	1.05203e+07	4.53668e+06	4.0796e+06
C19H30N4O16P2	UDP-2,4-bis(acetamido)-2,4,6-trideoxy-beta-L-altropyranose; UDP-2,4-diacetamido-2,4,6-trideoxy-beta-L-altrose;	map00520 Amino sugar and nucleotide sugar metabolism		560899	137302	63118	321805	465772	180987	468810	261788	331488
C20H26N10O15P2	5'-Phosphoguanylyl(3'->5')guanosine;	map02025 Biofilm formation - Pseudomonas aeruginosa; map05111 Biofilm formation - Vibrio cholerae		114451	30463.9	20202.4	71953.5	98686	46577.8	96149.2	57333.1	65765.3
C9H7NO	3-Methyleneoxindole;	NULL		3256.14	4165.94	2703.63	4198.41	4084.18	6031.87	4603.52	2878.65	33901
C6H17N2O5P	Glyphosate-isopropylammonium;	NULL		34289	37599.5	52634	40490.8	41171.3	48973.1	39909.3	34896.1	36194.3
C15H12N2O	Carbamazepine;	map00982 Drug metabolism - cytochrome P450		52253	10794.2	8021.37	27043.6	37523.5	20751.1	38964.5	24764.6	28712.8
C13H18O7	Salicin; Salicoside;	map00010 Glycolysis / Gluconeogenesis; map01061 Biosynthesis of phenylpropanoids; map02060 Phosphotransferase system (PTS); map04742 Taste transduction		218962	135065	62693.9	189859	205893	115666	245545	140673	193901
C21H20O5	8-(1,1-Dimethylallyl)-3-methylgalangin; 8-(1,1-DMA)-3-methylgalangin;	NULL		17002	12970.7	12279.2	18912	19435.6	17346.6	19921.3	12480.6	18415.6
C7H5BiO4	Bismuth subsalicylate;	NULL		3739	6033.73	9882.48	5740.09	4841.75	6360.57	4487.27	4246.05	3107.67
C19H18O10	Lancerin; 4-C-Glucosyl-1,3,7-trihydroxyxanthone;	NULL		122055	100167	127298	158036	187072	140769	166656	110741	132640
C22H21ClN2O7	Anhydrochlortetracycline; Anhydro-7-chlorotetracycline;	NULL		410644	35059.6	37987.4	100264	177539	54401.7	250642	131703	96896.2
C11H12N4O3S	Sulfamonomethoxine;	NULL		63116.6	10499.4	9041.58	22086.4	36034.3	16689.7	41957.4	25427.3	24320.4
C20H20O4	Glabranin;	NULL		31895.5	33021.5	23267	35326.2	31771.4	26000.5	34879.2	34223.1	42620.8
C16H22N4O7	5-Amino-5-(4-hydroxybenzyl)-6-(D-ribitylimino)-5,6-dihydrouracil;	map00680 Methane metabolism; map01120 Microbial metabolism in diverse environments		13111.2	10564.8	15689.1	17586.5	16857.7	14817.8	14444.8	12159.9	16979.4
C10H15N5O3	Penciclovir;	NULL		41720	50159.7	46630.4	39427.8	36647.2	52999.8	38554.4	45672.4	44106
C19H20O6	2,3-Dihydro-2-(4-methoxyphenyl)-5,6,7-trimethoxy-4H-1-benzopyran-4-one; 4',5,6,7-Tetramethoxyflavanone;	NULL		117054	229377	203971	149111	167894	240033	145317	128416	135261
C22H34N6O13S2	2-(S-Glutathionyl)acetyl glutathione;	map00980 Metabolism of xenobiotics by cytochrome P450		130430	77796	65691.6	172940	92935	61513.6	145106	110124	121793
C8H9NO4	3-Hydroxy-4-hydroxymethyl-2-methylpyridine-5-carboxylate; 5-Pyridoxate; 5-Pyridoxic acid;	map00750 Vitamin B6 metabolism		38368.8	41041.5	50149.3	37846	46456.5	45065.2	36981.7	39035.7	47316.6
C12H17NO2	3-(Dimethylamino)propyl benzoate;	map07015 Local analgesics		90510.5	82106.9	84947.6	83044.3	80808.5	78289.3	85637.8	84526.1	82821.4
C15H10N2O2	4,4'-Methylenediphenyl diisocyanate; Methylenebisphenyl diisocyanate;	NULL		3982.85	3918	5588.11	4957.1	3865.52	4583.46	4303.29	5385.19	5639.12
C12H21N3O6	Nicotianamine;	NULL		15351.5	13640.6	22119.8	26866.7	28710.7	25671.5	28250.5	18960.5	24353.9
C16H10O6	5-Hydroxypseudobaptigenin; 5,7-Dihydroxy-3',4'-methylenedioxyisoflavone;	map00943 Isoflavonoid biosynthesis		183327	66378.4	22787.5	142641	147385	67752.9	199098	105158	113045
C26H19Cl2N3O7	4'-O-Demethylrebeccamycin;	map00404 Staurosporine biosynthesis; map01130 Biosynthesis of antibiotics		14758.4	14177.2	25271	18816.3	11448.5	16149.6	21576	16392.2	18959.2
C5H12NO+	Betaine aldehyde;	map00260 Glycine, serine and threonine metabolism; map01100 Metabolic pathways		9155.55	9894.04	12124.9	9593	11521.6	14425.3	9417.55	10341.7	11754.3
C9H6O4	Caffeoquinone; Caffeic acid quinone;	NULL		90800.6	5378.28	2871.25	57221.2	76039.6	11049.9	88390.1	27377	35265.6
C12H11NO	N-Hydroxy-4-aminobiphenyl;	map05204 Chemical carcinogenesis		9504.27	7779.8	8485.31	14425.1	55024.5	43381.7	13678	13266.1	22700.1
C13H16N2O6	4-Nitrophenyl-3-ketovalidamine; p-Nitrophenyl-3-ketovalidamine; N-(4-Nitrophenyl)-3-ketovalidamine;	NULL		215613	179437	202397	250054	268891	202610	282461	246820	294370
C9H14N3O7P	dCMP; Deoxycytidylic acid; Deoxycytidine monophosphate; Deoxycytidylate; 2'-Deoxycytidine 5'-monophosphate;	map00240 Pyrimidine metabolism; map01100 Metabolic pathways		105681	127575	172273	108032	123476	128756	104108	112708	124183
C14H21NO14S	4-Deoxy-beta-D-gluc-4-enuronosyl-(1,3)-N-acetyl-D-galactosamine 6-sulfate; beta-D-4-Deoxy-Delta4-GlcAp-(1->3)-D-GalNAc6S;	NULL		168013	54955.7	82946.8	144590	176513	90740.7	178037	103697	125393
C11H15NO3	Tyr-OEt;	NULL		69376.3	44405.3	60978.2	94069.2	92741.6	56642.5	106803	59873	82665.2
C12H14Cl2N2	Methyl viologen; Paraquat dichloride; 1,1'-Dimethyl-4,4'-bipyridinium dichloride;	NULL		2327.45	4488.63	7322.88	2596.8	4788.5	21152.8	2592.66	2374.99	3146.03
C10H12N4O6	Xanthosine;	map00230 Purine metabolism; map00232 Caffeine metabolism; map01065 Biosynthesis of alkaloids derived from histidine and purine; map01100 Metabolic pathways; map01110 Biosynthesis of secondary metabolites		61701.5	73359.1	112218	72313.7	63020.6	68041.4	75120	83332.4	77827
C14H14N6O3	Dihydropteroate; 7,8-Dihydropteroate;	map00790 Folate biosynthesis; map01100 Metabolic pathways		105433	82137	96600.6	116373	116123	110187	121639	107763	125345
C19H18N4O7	Futalosine;	map00130 Ubiquinone and other terpenoid-quinone biosynthesis; map01110 Biosynthesis of secondary metabolites		132089	78272	128441	160654	165156	140112	150916	84609.6	126373
C29H25NO12	7-Methoxypradimicinone II;	NULL		215500	11782.9	20133.7	30140.8	48456	28278	93570.1	60920.3	29236.7
C8H17NO5	N-Ethylglycocyamine;	NULL		83195.4	84793.3	117458	68350.7	76788.8	148016	74420.5	84685.9	135891
C10H18N2O5	2,4-Bis(acetamido)-2,4,6-trideoxy-beta-L-altropyranose;	map00520 Amino sugar and nucleotide sugar metabolism		100425	88423.3	95946.2	108047	124729	101557	121697	121259	112485
C24H23N3O6S	Talampicillin;	NULL		213136	73507.3	85489.9	139835	139480	120914	170873	109921	120656
C6H13N	Cyclohexylamine; Cyclohexanamine;	map00930 Caprolactam degradation; map01120 Microbial metabolism in diverse environments		109000	107294	103970	101432	107232	95023.6	103835	103934	106756
C7H10O2	Toluene-cis-dihydrodiol; (1S,2R)-3-Methylcyclohexa-3,5-diene-1,2-diol;	map00623 Toluene degradation; map01120 Microbial metabolism in diverse environments; map01220 Degradation of aromatic compounds		13688.8	10782.8	13094.1	11117	12263	19709.9	11086.4	12125	23146.7
C8H17NO5	Miglitol;	NULL		35546.7	26720.5	32729.2	30885	32577.6	49294.6	31028.3	34550	64696.8
C12H14O	Capillanol;	NULL		74113.8	75417.5	78698.5	70721	69216.7	71232.9	72861.8	76204.7	72659.6
C10H14NO5P	p-Nitrophenyl-O-ethyl ethylphosphonate; Ethyl 4-nitrophenyl ethylphosphonate;	NULL		180237	182750	202495	173835	196599	155976	161234	168445	195492
C11H15NO9P+	Nicotinate D-ribonucleotide; beta-Nicotinate D-ribonucleotide; Nicotinate ribonucleotide; Nicotinic acid ribonucleotide;	map00760 Nicotinate and nicotinamide metabolism; map01100 Metabolic pathways		29753.3	28549.5	14149.5	46234.3	36614.8	32118.5	38761.3	41436	43696.5
C21H25N3O2	Tryprostatin B;	map00404 Staurosporine biosynthesis; map01130 Biosynthesis of antibiotics		7000.7	5152.51	6463.92	5986.62	5307.93	5374.45	6918.78	5744.97	7024.4
C16H20N2O6S	(S)-N-[3-(3,4-Methylenedioxyphenyl)-2-(mercaptomethyl)-1-oxoprolyl]-(S)-alanine;	NULL		77162.9	74829.5	87344.6	74604.5	91112	66423.5	72311.9	63396.1	90242.4
C22H18O7	Justicidin A;	NULL		151120	152795	197265	156508	186465	145282	151152	132238	180888
C43H53NO14	Docetaxel anhydrous; Docetaxel;	map04976 Bile secretion		94755.3	97029.9	70676.7	75092.7	84717.1	76340.5	96449.8	89837.2	65898
C9H10O3	3-(2-Hydroxyphenyl)propanoate; 2-Hydroxyphenylpropanoate; 3-(2-Hydroxyphenyl)propionic acid; Melilotate; 3-(2-Hydroxyphenyl)propionate;	map00360 Phenylalanine metabolism; map00624 Polycyclic aromatic hydrocarbon degradation; map01120 Microbial metabolism in diverse environments		118651	113857	130120	116801	144074	96471.7	106619	103889	135590
C9H11NO2	L-Phenylalanine; (S)-alpha-Amino-beta-phenylpropionic acid;	map00360 Phenylalanine metabolism; map00400 Phenylalanine, tyrosine and tryptophan biosynthesis; map00460 Cyanoamino acid metabolism; map00940 Phenylpropanoid biosynthesis; map00960 Tropane, piperidine and pyridine alkaloid biosynthesis; map00966 Glucosinolate biosynthesis; map00970 Aminoacyl-tRNA biosynthesis; map01060 Biosynthesis of plant secondary metabolites; map01061 Biosynthesis of phenylp…		1.41568e+06	1.33773e+06	1.5332e+06	1.39866e+06	1.70673e+06	1.13102e+06	1.30539e+06	1.20634e+06	1.60519e+06
C13H16O10	1-O-Galloyl-beta-D-glucose; 1-Galloyl-beta-glucose; beta-Glucogallin; 1-Galloyl-beta-D-glucose;	map01061 Biosynthesis of phenylpropanoids		130426	102723	96405.1	140287	163452	113017	166759	116759	144836
C14H20N2O9	Acalyphin;	NULL		119124	110828	112835	147273	141492	130563	146479	119680	124605
C17H22N2O10S2	4-Methoxyglucobrassicin; 4-Methoxy-3-indolylmethyl glucosinolate;	NULL		278074	283536	211273	457440	500065	421075	432394	297483	343542
C9H12O2	3-Isopropylcatechol;	NULL		1.53082e+06	1.3488e+06	1.5226e+06	1.52446e+06	1.84325e+06	1.14619e+06	1.38681e+06	1.26438e+06	1.82201e+06
C9H8O3	4-Coumarate; p-Coumaric acid; trans-4-Hydroxycinnamate; trans-p-Hydroxycinnamate; 4-Hydroxycinnamic acid; 4-Hydroxycinnamate;	map00130 Ubiquinone and other terpenoid-quinone biosynthesis; map00350 Tyrosine metabolism; map00360 Phenylalanine metabolism; map00940 Phenylpropanoid biosynthesis; map00950 Isoquinoline alkaloid biosynthesis; map01061 Biosynthesis of phenylpropanoids; map01100 Metabolic pathways; map01110 Biosynthesis of secondary metabolites; map01220 Degradation of aromatic compounds		30085.2	12995.4	9977.13	20285.8	37524.1	17330.2	22959.3	21284.6	25877.2
C9H18N2O4	D-Lysopine; N2-(D-1-Carboxyethyl)-L-lysine; Lysopine;	map00310 Lysine degradation		22179.6	11287	9378.3	21906.8	19276	18470.9	21757.3	19631.2	16108.1
C12H8S3	alpha-Terthienyl; Terthiophene;	NULL		12399.9	12442.3	16791.2	10493	11294.3	11136.4	9083.19	10620.2	12328.1
C16H22N2O2	Allyxycarb;	NULL		1.17662e+06	339087	3894.25	391922	2.28836e+06	682325	393546	861096	798117
C18H16O4	4-Ethyl-7-hydroxy-3-(p-methoxyphenyl)coumarin;	NULL		49603.1	47348.1	52046.7	53117.6	52840.2	53780	56647.1	57205.1	55339.3
C19H18O4	7-Hydroxy-3-(4-methoxyphenyl)-4-propyl-2H-1-benzopyran-2-one; 7-Hydroxy-3-(4-methoxyphenyl)-4-propylcoumarin;	NULL		216089	123476	99845.1	242312	217525	197855	219463	199397	177008
C20H13N3O2	Deoxyviolacein;	map00404 Staurosporine biosynthesis; map01130 Biosynthesis of antibiotics		118375	110274	113598	129012	129961	114361	137261	114658	123705
C12H22O11	Epimelibiose; 6-O-(alpha-D-Galactopyranosyl)-D-mannopyranose;	map00052 Galactose metabolism		577514	477125	314725	604455	567072	494254	564266	510540	702377
C23H30N4O4S2	BMS-268770;	NULL		23001.5	11948.7	7803.08	25588.3	23183.3	13441	16115.7	15909	23918.7
C33H30O9	Sanggenon B;	NULL		162793	91886.8	79993.8	213101	164775	115954	191204	164976	170218
C42H44FeN4O16	Siroheme;	map00860 Porphyrin and chlorophyll metabolism; map01100 Metabolic pathways; map01110 Biosynthesis of secondary metabolites		7.15153e+06	195077	18988.8	648932	1.44292e+06	261155	3.08885e+06	1.84302e+06	713707
C4H11NS	3-Methylthiopropanamine; 3-Methylthiopropylamine; 3-(Methylsulfanyl)propanamine;	NULL		4665.09	4633.08	5166.98	4560.43	5821.48	3997.66	4222.66	4160.09	6030.96
C15H21N5O5	O-beta-D-Xylosylzeatin; O-beta-D-Xyloxylzeatin;	map00908 Zeatin biosynthesis; map01110 Biosynthesis of secondary metabolites		92413.4	62353	71748.7	102548	87224.4	81535.9	105329	85975	150522
C12H14N2O5	Dinex;	NULL		22122.3	20580.8	13618.6	25143	17972.4	21172.5	22689.8	26581.4	30742.3
C16H22N2O7	Dinocton 6;	NULL		86903.9	88575.9	92020.8	99616	100200	96714.1	102522	90923.9	114354
C30H26O10	Afzelechin-(4alpha->8)-afzelechin;	NULL		171291	238497	126262	282475	274117	260257	264640	230759	265967
C6H8O2	cis-1,2-Dihydrobenzene-1,2-diol; cis-Benzeneglycol; cis-Cyclohexa-3,5-diene-1,2-diol;	map00361 Chlorocyclohexane and chlorobenzene degradation; map00362 Benzoate degradation; map01120 Microbial metabolism in diverse environments; map01220 Degradation of aromatic compounds		22961.1	29179.4	33808.5	22719.3	27661	30556.4	28184.6	22730.5	26914.2
C8H15NO5	N-Acetyl-D-fucosamine; 2-Acetamido-2,6-dideoxy-D-galactose;	NULL		15058.5	18902.1	19838.7	17178.5	17842.8	20352.2	16844.2	14849.1	13431.2
C9H16N2O5	gamma-L-Glutamyl-L-2-aminobutyrate;	map00270 Cysteine and methionine metabolism; map01100 Metabolic pathways		37674.8	43040.7	43750.8	41319	38204.4	50501.8	42378.5	38976.4	41076.2
C20H23NO3	Benalaxyl;	NULL		48048.1	51064.9	45358.4	49684.5	31436.2	38598.6	53230.9	48926.3	46729.7
C20H22N8O5	Methotrexate;	map04976 Bile secretion		3406.6	3175.83	22816.1	5422.98	3726.99	5484.87	3860.32	4578.25	6146.87
C11H12N2O4	L-Formylkynurenine; N-Formyl-L-kynurenine; N-Formylkynurenine;	map00380 Tryptophan metabolism; map01100 Metabolic pathways		27694.2	26044.6	28651	30449.6	27565.4	33791.1	28053.9	25200.1	31743
C18H14O8	Versiconal;	map00254 Aflatoxin biosynthesis; map01130 Biosynthesis of antibiotics		33927.6	18780.2	20663.6	79922.2	104966	87124.2	83995.9	100780	106583
C10H14N2O	Pseudooxynicotine; 4-(Methylamino)-1-(pyridin-3-yl)butan-1-one;	map00760 Nicotinate and nicotinamide metabolism; map01120 Microbial metabolism in diverse environments		3318.73	5049.23	8018.96	2960.79	5064.15	7559.29	3302.4	2339.58	3192.95
C16H12O7	Capillarisin;	NULL		14661	2836.11	2489.52	7169.94	9399.16	3781.03	9818.85	5288.12	5879.01
C19H24O3	Prallethrin;	NULL		245721	100821	13288	299316	226063	113648	306446	144448	167354
C12H18O5S2	Isoprothiolane sulfoxide; Propanedioic acid, 1,3-dithiolan-2-ylidene-, bis(1-methylethyl) ester, 5-oxide;	NULL		134258	131038	171760	413564	655665	649811	417641	606217	518966
C19H22FN3O4	Gatifloxacin; AM 1155;	NULL		51076.8	39694.7	29800.8	61114.9	179041	373974	58529.6	68178	101625
C21H26ClN3OS	Perphenazine; 4-(3-(2-Chlorophenothiazin-10-YL)propyl)-1-piperazineethanol;	NULL		315985	726747	1.31357e+06	167797	596612	1.12258e+06	225640	124473	163328
C24H29NO10	Demethylalangiside;	map00950 Isoquinoline alkaloid biosynthesis		51059.1	53331.5	61250.3	81867.8	69474.6	68275.1	62384.2	58603.1	77239
C20H32N6O12S2	Glutathione disulfide; GSSG; Oxiglutatione; Oxidized glutathione;	map00480 Glutathione metabolism; map04216 Ferroptosis; map04918 Thyroid hormone synthesis		3.20035e+07	3.1199e+06	288575	1.37433e+07	2.19454e+07	5.07077e+06	2.18361e+07	1.01613e+07	1.23682e+07
C13H10O6	Maclurin;	NULL		34822	12858	6931.7	26768.1	34590	15281.4	32187.5	18910	25134.2
C5H10O5	D-Ribose;	map00030 Pentose phosphate pathway; map02010 ABC transporters; map02030 Bacterial chemotaxis		41804.9	41204	34236.8	39616.5	33354.9	32180.8	34979.5	31102.9	31736
C6H7FO2	1-Fluorocyclohexadiene-cis,cis-1,2-diol;	map00364 Fluorobenzoate degradation; map01120 Microbial metabolism in diverse environments		32937	7725.62	3092.21	21598.3	28447.3	8726.53	28801.9	16120.5	19078
C7H12O3S	2-Oxo-6-methylthiohexanoic acid; 6-(Methylthio)-2-oxo-hexanoic acid;	map00966 Glucosinolate biosynthesis; map01110 Biosynthesis of secondary metabolites; map01210 2-Oxocarboxylic acid metabolism		111670	97137	112662	107824	235016	147002	113766	97605	111191
C11H14O4	Multifidol;	NULL		17729.9	3159.25	387.482	12104.3	16568.4	5082.45	15550.7	7038.25	10736.4
C11H10O5	Leptodactylone;	NULL		68305.8	13985.8	7225.29	47694.2	59113.5	21661.5	60507.6	32120.7	39955.1
C14H10O4	Cyperaquinone; 3-Methyl-6-prop-1-en-2-ylfuro[3,2-f][1]benzofuran-4,8-dione;	NULL		130905	53935.5	32745.8	110957	129330	61427.8	137455	86986.7	93842
C17H12O7	(-)-Acanthocarpan;	NULL		665221	164610	35163.5	526172	624777	258423	644973	377361	504597
C15H24O9	Leonuridine;	NULL		57268.8	51739.8	48684.7	67831.3	51866.5	43557.6	58048.7	50241.5	51394.2
C18H26O4	Capsiate;	NULL		47014.8	34295.5	47051.6	61106.8	57175.3	46238.6	55525.6	43540.6	49839.6
C16H22O11	Monotropein;	NULL		175455	127023	131803	152277	165775	141012	163221	127285	126534
C9H16N6O8S	Decarbamoylgonyautoxin 1;	NULL		75039.8	28092.3	14914.9	68477.7	80360.9	40422.6	78977.6	45642.3	62642.1
C17H26O11	Ipolamiide;	NULL		59305.2	47833.3	77240.3	106607	109520	79609.9	73798.6	53094.5	110061
C13H10Cl2FN5O3S	Diclosulam;	NULL		135547	30570.3	4299.67	112000	116819	45102.2	129438	71856.8	109433
C31H24O12	Kolaflavanone;	NULL		112103	113137	153990	145999	149908	152223	144296	119339	143450
C16H23N5O17P2	GDP-D-mannuronate; GDP-D-mannuronic acid;	map00051 Fructose and mannose metabolism; map00520 Amino sugar and nucleotide sugar metabolism		160047	21562.2	2847.51	102262	129718	27601.7	143066	54466.4	97205.3
C7H6O2	Tropolone;	map07216 Catecholamine transferase inhibitors		160762	87967	69366.5	125527	143019	92641.4	150976	110634	128664
C7H8O4	(1R,6S)-1,6-Dihydroxycyclohexa-2,4-diene-1-carboxylate; cis-1,2-Dihydroxycyclohexa-3,5-diene-1-carboxylate; cis-1,6-Dihydroxy-2,4-cyclohexadiene-1-carboxylic acid;	map00362 Benzoate degradation; map01100 Metabolic pathways; map01120 Microbial metabolism in diverse environments; map01220 Degradation of aromatic compounds		1.63205e+06	241151	44381.9	1.03616e+06	1.41534e+06	345893	1.49007e+06	646417	944382
C8H8O4	2-Acetylphloroglucinol; Monoacetylphloroglucinol;	NULL		383812	84953.4	44852.8	227707	316597	99233.3	334192	164314	213107
C8H14O5S	2-(3'-Methylthio)propylmalic acid; 2-(3'-Methylthio)propylmalate;	map00966 Glucosinolate biosynthesis; map01210 2-Oxocarboxylic acid metabolism		62614.2	14187.1	13533.7	24142.8	32440.2	16715.4	40975.9	25013.4	24846.3
C15H12O7	Pentahydroxyflavanone; Dihydrotricetin;	map00941 Flavonoid biosynthesis; map01110 Biosynthesis of secondary metabolites		1.05326e+06	175026	51341.8	662430	936808	231050	948921	405874	618521
C15H14O7	Leucocyanidin; 2-(3,4-Dihydroxyphenyl)-3,4-dihydro-2H-1-benzopyran-3,4,5,7-tetrol; 3,3',4,4',5,7-Flavanhexol; 3,4-Cyanidiol; Leucoanthocyanidol; Leucocianidol; Leucocyanidol; Leukocyanidine; Procyanidol; Resivit; 2,3-trans-3,4-cis-Leucocyanidin;	map00941 Flavonoid biosynthesis; map01061 Biosynthesis of phenylpropanoids; map01110 Biosynthesis of secondary metabolites		7.88749e+06	1.0235e+06	168708	4.58814e+06	6.56095e+06	1.50628e+06	7.03871e+06	2.99636e+06	4.27733e+06
C12H22O11	Palatinose; Isomaltulose; 6-O-alpha-D-Glucopyranosyl-D-fructofuranose;	NULL		83910.7	67277.7	45365.9	80946.6	55933.1	44777.4	75673.5	70611.6	72051
C16H15N2NaO6S2	Cephalothin sodium; Cefalotin sodium;	NULL		48771.1	21686	25872.6	34491.9	40783	22922.6	46359.5	27222.5	35930.3
C15H15ClFN3O3S2	Fluthiacet-methyl;	NULL		12479	2064.71	304.48	8261.75	11368.6	2431.31	12542.3	5703.91	8287.73
C6H8O3	5-Hydroxymethylfurfuryl alcohol; 2,5-Bis(hydroxymethyl)furan;	map00365 Furfural degradation; map01120 Microbial metabolism in diverse environments		19052.2	4624.53	3731.53	10853.1	16406.1	3721.22	12198.5	7467.42	7918.37
C8H10O4	3,4-Dihydroxyphenylethyleneglycol;	map00350 Tyrosine metabolism; map01100 Metabolic pathways		17409.3	8501.92	3643.05	13928.8	15597.4	7093.65	14026.1	10798.1	12978.3
C12H12O2	Butylidenephthalide;	NULL		21649.5	4271.71	1686.91	13817.2	17817.3	7256.41	19217.5	8331.13	13330.8
C15H12O8	2,3-Dihydrogossypetin;	NULL		121078	39213.9	12918.8	116391	138264	56151.5	134826	74909.5	101959
C14H10O5	Gentisin; 1,7-Dihydroxy-3-methoxyxanthone;	NULL		1.16697e+06	432569	90994.1	1.20059e+06	1.41804e+06	582091	1.29539e+06	731252	1.01614e+06
C20H30	Abieta-8,11,13-triene;	NULL		16104	2639.75	2443.93	8657.22	15304	3120.46	15977.4	7629.78	9899.99
C15H10O8	Gossypetin; 3,3',4',5,7,8-Hexahydroxyflavone;	NULL		26622.1	11845.9	6138.88	27197.8	27747.7	14948.6	29948.1	21553.5	24188.8
C22H23NO6	Aureothin;	NULL		9508.94	10963	19204	21951.3	338681	831810	15267.9	95864.5	196266
C22H30N2O2	Aspidospermine;	NULL		5700.37	4577.25	5446.39	12849	17871.2	35417.3	9668.71	17129.9	9253.23
C25H22ClNO3	Fenvalerate; Pydrin;	NULL		499.106	675.6	1753.06	823.914	19431	63002.4	822.66	4970.65	11744.3
C20H16O8	1'-Hydroxyversicolorone; Hydroxyversicolorone;	map00254 Aflatoxin biosynthesis; map01130 Biosynthesis of antibiotics		166827	97794.5	58025.9	175536	178341	108029	188369	144229	154199
BiH2N3O9	Bismuth subnitrate; Bismuth hydroxide nitrate oxide;	NULL		19606.9	7619.69	1366.75	20429.9	16129	11343.4	18126.8	17497.6	25051.7
C26H28N2O8	Deoxypumiloside;	map01063 Biosynthesis of alkaloids derived from shikimate pathway		19964.9	6777.22	1656.83	20025	26367.2	17325.1	24727.1	9850.95	13397.7
C5H11NO2	Betaine; Trimethylaminoacetate; Glycine betaine; N,N,N-Trimethylglycine; Trimethylammonioacetate;	map00260 Glycine, serine and threonine metabolism; map01100 Metabolic pathways; map02010 ABC transporters		4818.75	6167.71	10350	4690.33	5147.56	7077.34	11274.9	3984.11	7369.31
C9H12N2O2	5-Hydroxykynurenamine;	map00380 Tryptophan metabolism		54490.2	57248	64249.6	64619.6	52671.2	71792.8	62564.5	57498.7	60520.5
C13H16O2	Plastoquinone-1;	NULL		50975.4	44305.8	48008	54050.2	48848.7	54570.8	51638.6	46606.8	55276.5
C12H20N2O7	2'-Deoxymugineic acid;	NULL		18536.8	16484.6	19621.7	25414.9	23368.4	22937.2	23472.2	18808.4	24338.7
C22H21NO5	N-Methyl-2,3,7,8-tetramethoxybenzophenanthridine-6(5H)-one;	NULL		17295.3	11639.9	16945.5	27957.8	533025	988576	22703.3	105373	300417
C19H32N2O5	Perindopril;	NULL		12294	7153.67	8647.12	20704	28635.6	41243.6	15019.1	25219.8	15874
C27H34O15	Geniposide pentaacetate; Pentaacetyl geniposide;	NULL		282708	94099.8	62950.6	484204	777272	226485	661756	375313	392402
C27H42N7O18P3S	3,4-Didehydroadipyl-CoA semialdehyde; cis-3,4-Dehydroadipyl-CoA semialdehyde; (3Z)-6-Oxohex-3-enoyl-CoA;	map00362 Benzoate degradation		322490	260439	15093.5	690673	654164	228051	625338	359317	553782
C27H44N7O19P3S	3-Hydroxy-5-oxohexanoyl-CoA;	map00627 Aminobenzoate degradation; map01120 Microbial metabolism in diverse environments		5.21964e+06	425208	35953.1	1.25569e+06	1.72299e+06	449276	2.89546e+06	1.65123e+06	1.22172e+06
C9H14N4O5	Acadesine; AICA riboside; 5-Amino-1-beta-D-ribofuranosylimidazole-4-carboxamide; 5-Aminoimidazole-4-carboxamide-1-beta-D-ribofuranoside;	NULL		12632.9	17698.1	15442.5	23273.2	16606.1	18768.2	23744	19425.5	20711.7
C31H48N7O18P3S	4-Isopropenyl-2-oxy-cyclohexanecarboxyl-CoA; 4-Isopropenyl-2-ketocyclohexane-1-carboxyl-CoA;	map00903 Limonene and pinene degradation; map01220 Degradation of aromatic compounds		644351	384325	66804.8	875516	1.03312e+06	669483	906755	745750	827652
C6H8O6	5-Dehydro-4-deoxy-D-glucuronate; 4-Deoxy-L-threo-5-hexosulose uronate;	map00040 Pentose and glucuronate interconversions		16197.6	20325.6	20018	26356.2	26138.5	31385.6	19551.8	20308.4	21898.3
C6H10O7	2-Keto-D-gluconic acid; 2-Dehydro-D-gluconate; 2-Dehydro-D-gluconic acid; alpha-D-arabino-2-Hexulosonic acid;	map00030 Pentose phosphate pathway; map01100 Metabolic pathways; map01120 Microbial metabolism in diverse environments		275015	95288.5	58425.5	279299	389037	236703	333524	171800	212126
C9H8O5	3-(3,4-Dihydroxyphenyl)pyruvate; 3,4-Dihydroxyphenylpyruvate;	map00350 Tyrosine metabolism		164986	22421.4	2738.99	163237	197733	54049.4	189945	83454.4	122370
C10H9NOS	Brassicanal A;	NULL		43003.1	40105.9	38219.2	42681.4	52128.1	130820	41775.9	39547.6	41183.9
C13H13N5O2	N-Acetoxy-MeIQx;	map05204 Chemical carcinogenesis		14225.8	11194.6	9652.78	13651.7	11414.7	10301.9	12414.2	10662.7	14776.5
C19H25FO2	16beta-Fluoroandrost-4-ene-3,17-dione;	NULL		63113.7	134894	220945	29874.3	163438	1.2332e+06	26476	23353.6	31658.2
C17H12O8	Aflatoxin-M1-8,9-epoxide;	map00980 Metabolism of xenobiotics by cytochrome P450		446947	130719	43849.4	424700	506677	204571	508501	258003	326484
C11H17N2O8P	NMNH; Reduced nicotinamide nucleotide;	NULL		147068	61598.2	39947.5	149055	173822	82688.8	175635	98552.8	115136
C13H18N2O9S	Ritipenem acoxil hydrate; Penemac; FC/TA-891;	NULL		1.11957e+06	405733	372897	648979	898112	572850	854469	534064	677490
C21H20O13	Gossypin; Gossypetin 8-O-glucoside;	NULL		4.93849e+06	1.22894e+06	280401	5.55922e+06	6.80436e+06	2.23528e+06	6.76578e+06	2.97053e+06	3.5112e+06
C9H15N2O15P3	UTP; Uridine 5'-triphosphate; Uridine triphosphate;	map00240 Pyrimidine metabolism; map01100 Metabolic pathways; map04080 Neuroactive ligand-receptor interaction		79210.4	32102.5	51550.2	75419	46167.9	76410.7	73417.1	54700.5	53575.2
C9H14FN2O14P3	5-Fluorodeoxyuridine triphosphate;	map00983 Drug metabolism - other enzymes		139080	55688.6	85985.3	128920	78070.5	135918	119562	92659.8	87209.2
C10H11N5O	Pymetrozine;	NULL		23299.2	20089.7	19941.7	21023.4	18879.7	20640.1	19913.9	22055.7	21718.8
C13H10O5	Isopimpinellin; 5,8-Dimethoxypsoralen;	map01061 Biosynthesis of phenylpropanoids; map01110 Biosynthesis of secondary metabolites		339739	181201	124911	245563	294108	219698	290048	279350	454531
C8H12O8	8-Dehydro-3-deoxy-D-manno-octulosonate; 3,8-Dideoxy-8-oxo-D-manno-octulosonate;	NULL		101869	119119	97498.2	186902	180134	190953	135217	121719	144481
C10H7NO5	7,8-Dihydroxykynurenate;	map00380 Tryptophan metabolism		10238.5	6943.58	8379.66	12669.6	9454.82	8709.49	11680.8	10585.5	11567.5
C10H9NO3S	Probenazole;	NULL		10914.7	8507.6	10081.2	13677.3	10376	9403.76	10808.7	11702.3	12667.7
C15H10O6	Luteolin; 3',4',5,7-Tetrahydroxyflavone; 5,7,3',4'-Tetrahydroxyflavone;	map00941 Flavonoid biosynthesis; map00944 Flavone and flavonol biosynthesis; map01100 Metabolic pathways; map01110 Biosynthesis of secondary metabolites		940327	199072	79506.4	761526	990273	297479	981775	462623	660037
C17H20O4	Karwinaphthol B;	NULL		449799	213233	197695	410866	468704	231526	540545	483085	576822
C16H17N3O7S2	Cefoxitin;	NULL		157896	85123	82842.4	178006	193026	117939	195973	119499	143320
C21H20O13	4-o-Galloylbergenin;	NULL		1.42292e+06	283456	90136.5	1.69427e+06	2.07352e+06	588303	2.01933e+06	812647	1.04442e+06
C40H44O20	Scabraside;	NULL		3.52499e+06	157188	15692.6	535462	1.09656e+06	256034	1.46822e+06	909875	522263
C7H8O6	(Z)-But-1-ene-1,2,4-tricarboxylate; Homo-cis-aconitate; cis-Homoaconitate; (Z)-1,2,4-But-1-enetricarboxylic acid;	map00300 Lysine biosynthesis; map01100 Metabolic pathways; map01120 Microbial metabolism in diverse environments; map01130 Biosynthesis of antibiotics; map01210 2-Oxocarboxylic acid metabolism; map01230 Biosynthesis of amino acids		8693.64	8484.02	11902.3	8279.07	9990.89	11913.5	8717.77	8377.02	10502.6
C20H13ClN2	2-(4-Chlorophenyl)-3-phenyl-3-(2-pyridinyl)acrylonitrile;	NULL		639833	406434	471895	668432	719275	436952	789857	513030	565964
C13H18N4O3	N-Benzoyl-D-arginine;	NULL		36207.6	35824.1	45900.4	52767.1	41308.2	43779.6	40858	42013.7	42032.9
C18H27NO6	Rosmarinine; Senecionan-11,16-dione, 1,2-dihydro-2,12-dihydroxy-, (1alpha,2alpha)-;	NULL		16456.4	6269.12	4087.8	14521.4	11229.5	3380.83	13837.5	18300.5	16486.4
C17H24O12	Secogalioside;	NULL		1.31338e+06	1.1835e+06	1.16341e+06	1.41201e+06	1.19292e+06	1.38562e+06	1.352e+06	1.26822e+06	1.22382e+06
C10H18N2O3	Dethiobiotin; Desthiobiotin;	map00780 Biotin metabolism; map01100 Metabolic pathways		16586.4	5518.43	3509.65	13217.6	4606.19	2910.54	15485.6	12953.9	17711.5
C5H11N2O6P	N5-Phospho-L-glutamine;	NULL		105015	123691	118350	106613	114538	125371	109377	121837	108287
C19H10O2	10-Oxabenzo[def]chrysen-9-one; 9H-Pyreno[1,2-b]pyran-9-one;	map00624 Polycyclic aromatic hydrocarbon degradation; map01120 Microbial metabolism in diverse environments		39533.1	32783.4	32453.4	40128.3	35961.6	43152.7	45354.4	35792.7	36652.8
C18H20N2S	Methdilazine;	NULL		45680.9	44546	56018.2	82449.5	83378.4	71137.7	80524.3	57744.4	73233.4
C18H20N2O6	3-Methoxytyramine-betaxanthin;	map00965 Betalain biosynthesis		134208	137520	161446	170223	161605	175966	160414	152722	154078
C45H36O18	Cinnamtannin B1;	NULL		98173.3	102736	23819.5	91807.5	84026.9	71158.1	69301.2	78399.4	78174.5
C14H20N6O2	Discadenine; 3-(3-Amino-3-carboxypropyl)-N6-(Delta2-isopentenyl)-adenine;	map00908 Zeatin biosynthesis; map01110 Biosynthesis of secondary metabolites		4889.17	4240.69	59490.7	6172.03	4851.48	7701.25	5321.96	4622.32	5073.24
C18H26O5	alpha-Zearalanol; Zeranol;	NULL		72886	59346.5	74490.7	100531	92551.4	75185.1	86831.1	73891	92136.5
C22H30O3	Megestrol;	NULL		7186.1	5927.47	8198.6	11312.7	8628.06	8903.59	11668.4	9580.75	10351.9
C53H82O2	Plastoquinol-9; Plastoquinol A;	map00130 Ubiquinone and other terpenoid-quinone biosynthesis		1.25967e+06	683788	23097.4	2.06273e+06	3.32234e+06	673393	2.27849e+06	963073	2.12796e+06
C28H43N8O18P3S	2-Amino-5-oxocyclohex-1-enecarbonyl-CoA; 2-Amino-5-oxocyclohex-1-enecarboxyl-CoA;	map00627 Aminobenzoate degradation; map01120 Microbial metabolism in diverse environments		1.00351e+06	773026	146678	1.81477e+06	1.86056e+06	1.24147e+06	1.63362e+06	1.38494e+06	1.59831e+06
C8H16N2O3S2	S-(4-Methylthiobutylthiohydroximoyl)-L-cysteine;	map00966 Glucosinolate biosynthesis; map01110 Biosynthesis of secondary metabolites; map01210 2-Oxocarboxylic acid metabolism		12150.6	9225.75	9112.97	20648.4	16375.2	31304.3	19052	11630.3	15892.2
C13H8F2O3	Diflunisal;	NULL		26652.1	22622	28337.5	27520.1	34042.7	43287.8	28548.1	20268.2	27766.9
C13H21ClN4O2S	Tos-Arg-CH2Cl;	NULL		102515	105106	182958	117676	110700	130424	117703	98127.6	124110
C17H20N2O6S	Methicillin;	NULL		63578.8	60344.5	110017	74320.1	88709.7	91382.2	71087.2	61421.4	86586.9
C25H22O6	Cyclomorusin;	NULL		59110.6	10540.2	10600.4	315538	333640	143237	243639	107742	213296
C31H43N8O17P3S	S-2-(Indol-3-yl)acetyl-CoA;	NULL		1.10449e+06	973771	200158	1.74133e+06	1.8526e+06	1.01293e+06	1.67939e+06	1.47649e+06	1.50668e+06
C12H14O4	Coniferyl acetate;	map00940 Phenylpropanoid biosynthesis		74900.2	69438	68602.5	72435.4	76966.7	78053.9	78642.7	71832	79127.4
C12H17NO3	Cerulenin;	NULL		27554.7	50559.5	66464.1	43918.1	82247.2	47622.1	48482.7	34590.5	31867.3
C14H20O2	Oblongolide;	NULL		26910.3	11591.6	8574.11	23519	9302.89	8113.57	25704.3	22205.8	30345.2
C15H18O2	Dehydrocostus lactone;	NULL		214.431	46.6709	1592.84	5046.85	413.215	48.9732	178.748	32.5388	69.3265
C17H19N4O8P	Riboflavin cyclic-4',5'-phosphate;	NULL		90619.9	426828	812675	98283.5	302074	663860	98319.2	61729.2	99469.9
C30H24O12	Proanthocyanidin A2; Epicatechin-(2beta->7,4beta->8)-epicatechin;	NULL		803037	295563	83817.5	386270	422722	232196	415477	327477	337328
C21H35N9O15P2	N(omega)-(ADP-D-ribosyl)-L-arginine; Nomega-(ADP-D-ribosyl)-L-arginine;	NULL		262949	38465.2	26648.1	88720.9	109982	63900.2	112814	88845.7	75081.7
C30H22O13	Manniflavanone;	NULL		1.03085e+06	1.43543e+06	460291	2.03494e+06	1.79706e+06	1.15681e+06	1.78501e+06	1.62294e+06	1.78476e+06
C22H34N5O15P	CMP-pseudaminic acid;	map00520 Amino sugar and nucleotide sugar metabolism		46003.7	38994.4	8504.22	105522	110087	53163.9	115502	70906.3	88490
C10H21NOS	9-Methylthiononanaldoxime; (E)-9-(Methylthio)nonanaldoxime;	map00966 Glucosinolate biosynthesis; map01210 2-Oxocarboxylic acid metabolism		4026.07	4887.85	8960.27	4364.49	5832.27	4316.98	3976.96	5520.53	3584.12
C11H9NO4	5-Hydroxyindolepyruvate;	map00380 Tryptophan metabolism		31641.8	34711.8	46931.4	25699	29192.5	42201.3	25298.7	35758	36957.8
C12H15N3O4S	Albendazole sulfone;	NULL		30442.9	27265.6	42837.3	35966.3	31905.4	43251.9	33184.5	34834.1	39408.3
C14H19Cl2NO2	Chlorambucil;	NULL		153978	153771	211907	174218	174437	216982	164847	184692	204104
C9H10INO3	3-Iodo-L-tyrosine;	map00350 Tyrosine metabolism; map01100 Metabolic pathways; map04918 Thyroid hormone synthesis		10243.9	12464.3	17184.8	9866.3	6545.69	12415.3	10350.1	11492.7	10627.9
C28H35N3O7	Virginiamycin M1; Mikamycin A; Pristinamycin IIA; Streptogramin A;	NULL		66666.1	48668.3	25264.4	75208.8	44300.3	47534.6	71134.7	66326.8	68334.3
C27H42N7O19P3S	3-Methylglutaconyl-CoA; trans-3-Methylglutaconyl-CoA; (E)-3-Methylglutaconyl-1-CoA;	map00280 Valine, leucine and isoleucine degradation; map01100 Metabolic pathways		224076	207490	25447.7	454514	439194	145163	455975	248258	386588
C28H44N7O17P3S	Cyclohex-1-ene-1-carboxyl-CoA;	map00362 Benzoate degradation; map01120 Microbial metabolism in diverse environments; map01220 Degradation of aromatic compounds		631933	677914	168581	1.25384e+06	1.26123e+06	817506	1.13662e+06	923619	1.11623e+06
C5H11NO3S	L-Methionine S-oxide;	map00270 Cysteine and methionine metabolism		21023.5	28526.5	23363.5	25019.5	26635.4	25223.4	21671.7	18396.6	22765.4
C20H19NO5	Parfumine;	NULL		21545.4	14167.3	18576.6	24916.2	39859.7	221333	22286	22707.4	42299.6
C19H22KN3O4S	Hetacillin potassium;	NULL		205292	150913	171338	224454	280955	441429	196453	186044	259881
C5H11NO	Pentanamide; Valeramide;	NULL		32930.4	37247.6	31895.5	33459.2	30450.3	43443.8	36598.8	36360.8	39172.2
C7H6O4	Patulin;	NULL		86542.3	77835.1	56284.6	78906.6	58822.7	44467.9	76418.6	61971.9	66976.9
C9H10O3	3-Ethoxybenzoate; 3-Ethoxybenzoic acid;	NULL		93777.3	87038.6	69608.1	97625.3	82194.1	97165.5	96250.4	93032.4	109053
C9H17NO5	Pantothenate; Pantothenic acid; (R)-Pantothenate;	map00410 beta-Alanine metabolism; map00770 Pantothenate and CoA biosynthesis; map01100 Metabolic pathways; map01110 Biosynthesis of secondary metabolites; map04977 Vitamin digestion and absorption		2.70455e+06	2.99135e+06	2.49735e+06	2.75951e+06	2.35569e+06	3.31191e+06	2.8955e+06	2.9343e+06	2.9533e+06
C17H20O5	Angustibalin; Helenalin 6-acetate;	NULL		363838	326155	504289	497218	427852	381205	440502	353096	462430
C19H24O6S	2-Methoxyestrone 3-sulfate;	map00140 Steroid hormone biosynthesis		26102.8	19475.1	11596.8	19122.9	23032.1	11515.6	28902	24476.2	20663.1
C18H19NO5	3-Epimacronine;	NULL		20965.3	12136.6	8929.44	16959.1	34236.2	22087.2	19060.2	33527.6	27303.6
C20H25NO2S2	Tiagabine;	NULL		66721.9	28831.9	33453	52290.3	142062	64173.7	61717.3	136802	83330.2
C23H18O8	Tetracenomycin A2;	map01057 Biosynthesis of type II polyketide products; map01130 Biosynthesis of antibiotics		44158	277093	44156.6	50151	79271	117536	48409.8	38085.6	50619.4
C26H32O5	Licoricidin;	NULL		58940.7	75616.3	79908.1	55064.9	49338.2	93625.4	56605.1	67531.3	69526.2
C25H30N2O5	Quinapril;	NULL		65554.2	47561	39729.1	59823.7	50154.9	60579.4	60436.3	56830.5	71213.5
C17H19F3N6O6S	Triflusulfuron-methyl;	NULL		60308.8	101380	82928.4	98804.6	94267.7	175836	79498.7	78583.7	83763.8
C30H29N3O7S	4,5-Dihydro-4-hydroxy-5-S-glutathionyl-benzo[a]pyrene;	map00980 Metabolism of xenobiotics by cytochrome P450; map05204 Chemical carcinogenesis		7009.85	8728.04	43883.5	7528.89	7149.22	12162	5459.26	4187.99	5431.74
C16H25N5O16P2	GDP-mannose; GDP-D-mannose; GDP-alpha-D-mannose;	map00051 Fructose and mannose metabolism; map00053 Ascorbate and aldarate metabolism; map00510 N-Glycan biosynthesis; map00520 Amino sugar and nucleotide sugar metabolism; map01100 Metabolic pathways; map01110 Biosynthesis of secondary metabolites		99954.6	72728.3	31890.2	175062	138790	80927.4	150047	125906	143855
C11H8O5	3-[6-(Carboxymethylene)cyclohexa-2,4-dien-1-ylidene]-2-oxopropanate;	map00624 Polycyclic aromatic hydrocarbon degradation; map01120 Microbial metabolism in diverse environments		16987.8	7662.52	3597.44	33656.7	29912.7	12033.1	28394	16416.2	29333.8
C11H8O3	Plumbagin;	NULL		8471.21	2970.03	881.253	19918.5	14871.2	5766.93	16473.4	7508.22	15338
C13H10O4	Visnagin;	map01060 Biosynthesis of plant secondary metabolites		78460.9	64071.6	49820.3	122530	106471	71423.4	108336	81726.8	109864
C15H12O8	2,2',3-Trihydroxy-3'-methoxy-5,5'-dicarboxybiphenyl;	map00627 Aminobenzoate degradation; map01120 Microbial metabolism in diverse environments		1.09768e+06	472306	44447.3	2.70439e+06	2.26443e+06	775305	2.09411e+06	1.15285e+06	2.16752e+06
C19H19FN2O	Demethylcitalopram;	map00982 Drug metabolism - cytochrome P450		103158	122353	132632	105221	118879	136381	115558	103857	122561
C12H16O12	4-(4-Deoxy-alpha-D-gluc-4-enuronosyl)-D-galacturonate; 4-(4-Deoxy-alpha-D-galact-4-enuronosyl)-D-galacturonate; Unsaturated digalacturonate;	map00040 Pentose and glucuronate interconversions		25557.4	13853.3	8554.99	54782	44411	18064.6	40478.3	26146.4	46866.6
C11H14N4O4S	5'-S-Methyl-5'-thioinosine; 5'-Deoxy-5'-methylthioinosine; S-Methyl-5'-thioinosine;	map00270 Cysteine and methionine metabolism; map01100 Metabolic pathways		157703	67219.7	30000.2	289489	252622	89233.5	228065	124702	250958
C17H14O8	Aflatoxin B1 dialdehyde;	map00980 Metabolism of xenobiotics by cytochrome P450		408357	354514	392688	391352	386884	335216	428914	360670	338257
C7H14O5	Digitalose; beta-D-Digitalopyranose;	NULL		240348	220943	185677	234172	214837	228097	236835	226873	248210
C15H11ClN2O	Nordazepam; Desmethyldiazepam; 7-Chloro-1,3-dihydro-5-phenyl-(2H)-1,4-benzodiazepin-2-one;	NULL		357045	211911	208518	306458	340263	272706	315969	251500	272191
C17H18O8	6-[2,3-Dihydroxy-1-(hydroxymethyl)propyl]-1,2-dihydro-7-hydroxy-9-methoxy-cyclopenta[c][1]benzopyran-3,4-dione;	map00980 Metabolism of xenobiotics by cytochrome P450		154649	45782.9	63328.2	861122	1.29328e+06	311816	650022	297079	569643
C21H30O9	Abscisic acid glucose ester; Abscisic acid-beta-D-glucopyranosyl ester; beta-D-Glucopyranosyl abscisate;	map00906 Carotenoid biosynthesis; map01100 Metabolic pathways; map01110 Biosynthesis of secondary metabolites		7922.41	4578.77	5459.88	23394.6	32927.6	15943.9	19805.3	8795.33	18460.9
C22H23ClN2O8	Chlortetracycline; 7-Chlorotetracycline; Aureomycin;	map00253 Tetracycline biosynthesis; map01057 Biosynthesis of type II polyketide products; map01130 Biosynthesis of antibiotics		112720	100480	98020.8	141037	149529	125317	135828	89801.7	95754.5
C20H24N4O9S	1-Nitro-7-hydroxy-8-glutathionyl-7,8-dihydronaphthalene;	map00980 Metabolism of xenobiotics by cytochrome P450		39468.6	35604.9	42323.2	43013.6	43599.2	40151	41795.2	28698.3	27652.8
C24H22O14	Luteolin 7-O-(6''-malonylglucoside);	NULL		48109.2	23531.5	28038.1	37902.9	38940.2	34261.9	34615	24350.1	29910.7
C45H38O18	Cinnamtannin A1; Proanthocyanidin C1; Procyanidin C1;	NULL		850319	316251	27686.7	423445	514611	309603	423739	355480	376075
C7H6O2	Benzoate; Benzoic acid; Benzenecarboxylic acid; Phenylformic acid; Dracylic acid;	map00360 Phenylalanine metabolism; map00362 Benzoate degradation; map00621 Dioxin degradation; map00623 Toluene degradation; map00627 Aminobenzoate degradation; map01063 Biosynthesis of alkaloids derived from shikimate pathway; map01100 Metabolic pathways; map01110 Biosynthesis of secondary metabolites; map01120 Microbial metabolism in diverse environments; map01220 Degradation of aromatic compou…		3489.52	2947.26	7905.73	4018.32	5593.09	4522.56	5122.05	4181.69	5292.66
C8H10O3	Vanillyl alcohol; 4-Hydroxy-3-methoxy-benzenemethanol; 4-Hydroxy-3-methoxybenzyl alcohol; 4-Hydroxy-3-methoxybenzenemethanol;	map00627 Aminobenzoate degradation; map01120 Microbial metabolism in diverse environments		63026.6	76667.4	294842	27381.2	31069.9	71683.7	43850.1	32576.4	37040.6
C9H8O4	trans-2,3-Dihydroxycinnamate; (2E)-3-(2,3-Dihydroxyphenyl)prop-2-enoate;	map00360 Phenylalanine metabolism; map01120 Microbial metabolism in diverse environments; map01220 Degradation of aromatic compounds		12130.2	7886.41	5732.81	10745.7	12846.1	6636.63	12322.5	8325.87	10463.3
C7H9NO2	Gabaculine; 3-Amino-2,3-dihydrobenzoic acid;	NULL		203108	188212	208922	182287	153580	220696	154466	172909	180682
C10H13NO5	L-Arogenate; L-Arogenic acid; Pretyrosine;	map00400 Phenylalanine, tyrosine and tryptophan biosynthesis; map01100 Metabolic pathways; map01110 Biosynthesis of secondary metabolites; map01230 Biosynthesis of amino acids		32083.4	35491.2	34942.6	37923.8	30894.4	45032.4	34885.9	38727.9	36476.6
C10H13N5O3	5'-Deoxyadenosine;	NULL		8961.07	12757.9	12337.3	12790.3	11898.4	18288.2	9106.29	12262.5	16933
C8H9NO3	3-Methoxyanthranilate; 3-Methoxyanthranilic acid;	map00380 Tryptophan metabolism		47217.1	40815.9	44057.1	45672.9	39361.7	48144.8	39109.8	41891.2	47857.6
C6H9N3O	4-Amino-5-hydroxymethyl-2-methylpyrimidine; Toxopyrimidine; 4-Amino-2-methyl-5-pyrimidinemethanol;	map00730 Thiamine metabolism; map01100 Metabolic pathways; map02010 ABC transporters		47923.6	34107.7	52422.4	41990.5	51921.4	50501.5	47880.4	30664.8	45581.6
C10H11NO4	p-Hydroxyphenylacetylglycine; 4-Hydroxyphenylacetylglycine;	map00350 Tyrosine metabolism		31915.9	31126.7	34239.9	35344.8	34151.4	38916.7	32188.1	37404.8	42310.7
C9H21ClN2O2	Propamocarb hydrochloride;	NULL		4382.48	3799.66	8095.25	3810.13	4178.7	6641.51	3971.97	3535.91	4440.57
C19H24O2	1-Methylestra-1,3,5(10),6-tetraene-3,17beta-diol;	NULL		263843	197456	19955.9	250580	287481	177873	235017	235033	314780
C15H12O6	Dihydrokaempferol; Aromadendrin; (+)-Dihydrokaempferol; (+)-Aromadendrin;	map00941 Flavonoid biosynthesis; map01061 Biosynthesis of phenylpropanoids; map01100 Metabolic pathways; map01110 Biosynthesis of secondary metabolites		1.01309e+06	617440	202046	768157	770737	440614	779634	600634	712015
C14H18O8	Glucovanillin;	NULL		85444.7	80971.8	352534	108764	218682	246426	98629.6	191097	295256
C16H28N4O6	(Ac)2-L-Lys-D-Ala-D-Ala; (Ac)2-L-lysyl-D-alanyl-D-alanine;	NULL		2403.54	8008.75	8060.02	2220.58	5555.6	19323.1	3289.05	2332.59	3208.03
C30H26O12	Epicatechin-(4beta->8)-ent-epicatechin;	NULL		3.6972e+06	1.61277e+06	155977	2.26804e+06	2.66685e+06	1.25196e+06	2.42663e+06	1.7854e+06	1.90014e+06
C24H26N2O13	Gomphrenin-I;	map00965 Betalain biosynthesis		23509.3	28579.4	14080.7	46387.6	31283.5	29617.1	36891.2	35355.2	37599.1
C7H8O2	2,3-Dihydroxytoluene; 3-Methylcatechol;	map00622 Xylene degradation; map00623 Toluene degradation; map00626 Naphthalene degradation; map01100 Metabolic pathways; map01120 Microbial metabolism in diverse environments; map01220 Degradation of aromatic compounds		15191	19322	64606.2	6253.55	8715.76	20667.8	9952.34	8771.15	8808.08
C8H10O4	1,6-Dihydroxy-5-methylcyclohexa-2,4-dienecarboxylate; 1,2-Dihydroxy-3-methylcyclohexa-3,5-dienecarboxylate;	map00622 Xylene degradation; map01100 Metabolic pathways; map01120 Microbial metabolism in diverse environments; map01220 Degradation of aromatic compounds		9294.36	7799.68	27264.1	13593.9	23590.3	23359.1	12681.7	17131.1	25326.9
C12H17NO5	N-D-Glucosylarylamine;	NULL		32875.7	33667.1	36188.9	42093.9	35319.7	35643.9	41585.5	34952.8	36581.7
C9H12N6O4	8-Azaadenosine;	NULL		84860.8	101192	450355	113910	263557	352865	108843	237317	352891
C15H25N3O7S	2-(Glutathion-S-yl)-2-methylbut-3-en-1-ol;	NULL		25391.3	24699.3	35648.3	36251.9	44636.1	207433	32172.7	34257.5	45473.6
C22H16O8	Tetracenomycin E;	map01057 Biosynthesis of type II polyketide products; map01130 Biosynthesis of antibiotics		624506	372135	201133	461072	592381	686911	469393	398519	470403
C21H23NO6	Gloriosine; N-Deacetyl-N-formylcolchicine;	NULL		43108.7	39383.5	46275.4	52628.8	48879.8	46098.7	46845	42710.1	55030.3
C22H20O10	Granaticin;	map01057 Biosynthesis of type II polyketide products; map01130 Biosynthesis of antibiotics		589424	326045	187120	441081	525811	342668	454449	370657	396348
C25H24O13	Biochanin A 7-O-(6-O-malonyl-beta-D-glucoside); Biochanin A 7-O-beta-D-glucoside 6''-O-malonate;	map00943 Isoflavonoid biosynthesis		1.24145e+07	6.3736e+06	897753	8.56309e+06	9.5601e+06	5.06768e+06	8.97834e+06	7.13609e+06	7.09665e+06
C18H31N3O14P2	dTDP-D-mycaminose; dTDP-alpha-D-mycaminose;	map00522 Biosynthesis of 12-, 14- and 16-membered macrolides; map00523 Polyketide sugar unit biosynthesis; map01130 Biosynthesis of antibiotics		101818	119965	181103	137617	135328	164301	123096	114841	132649
C15H22N5O16P3	ADP-ribose 1'',2''-phosphate; ADP-ribose 1",2"-cyclic phosphate;	NULL		10047.2	10218.4	614.442	5523.17	5528.81	2868.56	5173.17	6117.88	4564.07
C4H9NO4	4-Hydroxy-L-threonine; Hydroxythreonine;	map00750 Vitamin B6 metabolism		1752.46	8027.06	17374.1	2960.23	8611.42	12691.4	4010.67	12899	10206.9
C7H9N5O	7-Aminomethyl-7-carbaguanine; 7-Aminomethyl-7-deazaguanine;	map00790 Folate biosynthesis; map01100 Metabolic pathways		26682.5	42234.5	61189.1	28006.9	50690.9	68432.9	33560.5	62221.3	67515.4
C11H10N4	2-Amino-3-methylimidazo[4,5-f]quinoline; IQ;	map05204 Chemical carcinogenesis		18534.4	16501.9	18533.3	17096.6	14848.3	15503.9	20431.4	16107.8	17284.4
C7H16ClN	Mepiquat chloride;	NULL		11754.5	17798.2	22785.3	12845.6	17756.8	21369.4	14551.8	23923.3	24176
C10H14N2O4	Porphobilinogen;	map00860 Porphyrin and chlorophyll metabolism; map01100 Metabolic pathways; map01110 Biosynthesis of secondary metabolites; map01120 Microbial metabolism in diverse environments		16722.9	15532.6	23625.1	15468.8	16289.6	34013.5	14909.5	14231	16225.5
C17H19NO3	(S)-Coclaurine; Coclaurine; (S)-1,2,3,4-Tetrahydro-1-[(4-hydroxyphenyl)methyl]-6-methoxy-7-isoquinolinol; 1-(p-Hydroxybenzyl)-6-methoxy-7-hydroxy-1,2,3,4-tetrahydroisoquinoline;	map00950 Isoquinoline alkaloid biosynthesis; map01063 Biosynthesis of alkaloids derived from shikimate pathway; map01100 Metabolic pathways; map01110 Biosynthesis of secondary metabolites		141613	23782.6	11081.7	111991	61542.6	45134.6	75697.7	39897	96675.8
C16H20NO4+	Pteleatine;	NULL		25095.1	24300.7	25070.4	33164.8	32764.1	31068.9	29901.2	28705	34234.4
C19H23NO3	Laurifine;	NULL		11001.8	4208.6	4565.48	9855.78	8111.06	5022.84	9429.29	6219.47	8358.09
C14H18O7	Picein;	NULL		56148.6	46639.5	53412	75695.9	68425.2	58560.4	67785.2	53186.8	74712.6
C12H22N2O8	2'-Deamino-2'-hydroxy-6'-dehydroparomamine;	map00524 Neomycin, kanamycin and gentamicin biosynthesis; map01130 Biosynthesis of antibiotics		74844.2	41769.8	38706.4	56129.6	59726.3	58177.5	61180	51585.4	49805.5
C14H16N2O7	Portulacaxanthin I;	NULL		68466.1	7023.75	5336.14	11456.2	6687.42	6762.39	33312.3	31317.2	10544
C19H20O6	Echinone; 6-((1S)-1-(Acetyloxy)-4-methyl-3-pentenyl)-8-hydroxy-5-methoxy-1,4-naphthalenedione;	NULL		462119	400218	462694	631013	544672	472674	551782	447418	579176
C20H24O7	Tripdiolide; Triptodiolide;	NULL		341167	282193	334374	479574	439554	376809	406883	331552	461011
C18H26BrNO3	Hyoscyamine methylbromide; Atropine methobromide; Atropine methylbromide;	NULL		257007	907014	1.61717e+06	311653	842209	1.21052e+06	488247	1.3734e+06	1.13648e+06
C15H21N5O7S	Cylindrospermopsin;	NULL		187223	186404	224045	243076	290357	246743	232526	248146	269214
C20H23N7O7	Folinic acid; Leucovorin; 5-Formyltetrahydrofolate; L(-)-5-Formyl-5,6,7,8-tetrahydrofolic acid;	map00670 One carbon pool by folate; map01100 Metabolic pathways		4.91984e+06	4.19451e+06	4.8463e+06	6.97881e+06	6.3844e+06	5.37899e+06	5.8959e+06	4.79152e+06	6.56151e+06
C17H19N3O6	Pyriminobac-methyl;	NULL		351874	1.25757e+06	2.15948e+06	429437	1.23521e+06	1.50244e+06	695723	2.05709e+06	1.88774e+06
C14H18O9	1-O-Vanilloyl-beta-D-glucose;	NULL		27689.4	24514.2	29483.2	33698.1	32442.5	36555.2	31634.7	31960	40481.5
C16H13F2N3O	Flutriafol;	NULL		3545.01	3067.46	37804.5	3432.53	2979.43	4631.41	3951.77	4025.6	4809.63
C16H20O9	Gentiopicrin; Gentiopicroside;	map01066 Biosynthesis of alkaloids derived from terpenoid and polyketide; map01110 Biosynthesis of secondary metabolites		66816.5	53641.5	56500.3	63694.7	59116.5	54889	62731.3	59756.9	68870.3
C32H18N8	Phthalocyanine; 29H,31H-Phthalocyanine; Pigment blue 16;	NULL		35426.3	29947.6	37743.5	38203.6	41146.3	37002.9	42746.3	33101.5	49480.5
C24H22N4O2	L-365260; N-[(3R)-2,3-Dihydro-1-methyl-2-oxo-5-phenyl-1H-1,4-benzodiazepin-3-yl]-N'-(3-methylphenyl)urea;	map07117 Benzodiazepine family		50192.8	56337	95524.4	95628	127215	101520	67619.9	41753.2	72275.7
C7H12O2	Cyclohexane-1-carboxylate; Cyclohexanecarboxylic acid; Hexahydrobenzoic acid;	map00362 Benzoate degradation; map01120 Microbial metabolism in diverse environments		1052.15	2185.72	5441.58	1792.92	2135.17	5447.12	1599.14	1695.7	8713.2
C13H11NO2	Benzyl nicotinate; Nicotinic acid benzyl ester;	NULL		1795.58	1365.61	2646.88	1850.13	1834.76	1952.25	3230.44	16903.3	45861.5
C15H18N2O5	N-Carbobenzoxyglycylproline; Z-Gly-Pro; Z-Gly-Pro-OH;	NULL		13344	13548.6	18879.7	15269.2	15441.9	18104.3	15576.9	14279.2	16733.8
C18H28O11	Lamioside;	NULL		214221	187913	296162	373784	501284	328467	261281	165811	287511
C26H24N4O3	Holyrine A;	map00404 Staurosporine biosynthesis; map01130 Biosynthesis of antibiotics		19049.2	15053.9	18254.8	27091	29220.4	21193	22443.2	17328.7	23999.3
C10H17N3O	Dolichotheline;	map01065 Biosynthesis of alkaloids derived from histidine and purine; map01110 Biosynthesis of secondary metabolites		6324.82	5087.37	6029.15	4385.67	9403.97	3638.24	4505.52	6546.15	5765.17
C24H26N2O7S	(S)-N-[3-(3,4-Methylenedioxyphenyl)-2-(acetylthio)methyl-1-oxoprolyl]glycine benzyl ester;	NULL		36749	28604.4	65522.4	40272.3	76274	80590.4	35712.4	26083.1	39982.5
C23H28CaN3Na3O11	Caloxetate trisodium;	NULL		508336	454951	278280	864144	888082	684633	774970	652367	755806
C15H10O7	Tricetin; 5,7,3',4',5'-Pentahydroxyflavone;	map00941 Flavonoid biosynthesis		51987.2	31400.2	13192.7	125834	164482	32590.4	139903	49566.1	117613
C20H18O10	Kaempferol 3-O-beta-D-xyloside;	NULL		60231.9	34146.3	17006.8	102107	142151	33121.5	119439	42046.6	96391.4
C27H32O14	Naringin; Naringenin 7-O-neohesperidoside; Naringenin 7-O-[alpha-L-rhamnosyl-(1->2)-beta-D-glucoside];	map00941 Flavonoid biosynthesis		22250.8	19806.6	10831.4	103557	106943	41768.2	57935.8	48297.1	65496.7
C9H14N2O6P+	Pyrimidine 5'-deoxynucleotide;	NULL		64032.6	49672.5	51661.4	70291.7	78034.6	59664.4	73917.3	62099.7	77124.8
C14H19NO8	Lithospermoside; Griffonin;	NULL		30255.3	24002.6	78285.2	36293.9	40359	41255.1	37497.2	30756.9	46326.2
C30H27O13+	Cyanidin 3-O-(6-O-p-coumaroyl)glucoside;	map00942 Anthocyanin biosynthesis		800607	589017	355761	1.04225e+06	1.11932e+06	660684	1.11053e+06	779172	958461
C7H13NO3S	N-Acetylmethionine; N-Acetyl-L-methionine;	NULL		21933	19237.1	23218.5	24738.9	32275	21518.1	28121.9	24941.5	29203.7
C12H22O11	Sucrose; Cane sugar; Saccharose; 1-alpha-D-Glucopyranosyl-2-beta-D-fructofuranoside;	map00052 Galactose metabolism; map00500 Starch and sucrose metabolism; map01100 Metabolic pathways; map02010 ABC transporters; map02060 Phosphotransferase system (PTS); map04742 Taste transduction; map04973 Carbohydrate digestion and absorption		59856.2	45380.6	33870.7	51078.2	45498.4	38896	50901.2	45789.7	53206.3
C21H18O11	Baicalin; Baicalein 7-O-glucuronide;	NULL		99101.3	109409	125271	142224	143760	128003	145240	125514	138855
C20H20O11	Irisxanthone;	NULL		54368.9	50373.5	69264.2	74379.8	71231.8	69473.5	79844.2	57796	65922
C15H18N4O7S	Ethoxysulfuron;	NULL		69032.1	61505.8	67077.8	71986.8	63626.6	66621.4	79323.8	63826.1	71056.2
C11H8O	1-Naphthaldehyde; 1-Formylnaphthalene;	map00626 Naphthalene degradation; map01120 Microbial metabolism in diverse environments; map01220 Degradation of aromatic compounds		8044.27	5770.71	7029.2	8347.67	12190.2	9466.24	14082	8185.49	23853.7
C15H21N5O4	Isopentenyl adenosine;	map00908 Zeatin biosynthesis; map01110 Biosynthesis of secondary metabolites		4499.44	10019.5	17453.3	8679.94	22507.7	30656.1	6525.75	19290.8	21238.2
C30H27O13+	Pelargonidin 3-O-(6-caffeoyl-beta-D-glucoside);	map00942 Anthocyanin biosynthesis		493412	230258	232544	303522	276138	159579	325673	309758	335333
C32H26O14	Actinorhodin; Actinorhodine;	map01057 Biosynthesis of type II polyketide products; map01130 Biosynthesis of antibiotics		64038	51400.1	51378.5	295679	318934	112905	184416	114804	205103
C10H11NO	Indole-3-ethanol; Tryptophol;	map00380 Tryptophan metabolism		13890.7	4237.23	13050.1	14955	27184.3	17636.6	27411.4	12839	43873.5
C10H10N2	Nicotyrine; beta-Nicotyrine;	NULL		1.54374e+06	657270	1.28926e+06	1.77217e+06	2.76982e+06	1.9225e+06	2.7908e+06	1.60458e+06	4.51098e+06
C10H12N2	Tryptamine; 3-(2-Aminoethyl)indole;	map00380 Tryptophan metabolism; map00901 Indole alkaloid biosynthesis; map01060 Biosynthesis of plant secondary metabolites; map01063 Biosynthesis of alkaloids derived from shikimate pathway; map01100 Metabolic pathways; map01110 Biosynthesis of secondary metabolites; map04080 Neuroactive ligand-receptor interaction		7327.55	2889.51	7043.56	8400.54	16555.7	10846.5	16583.4	7501.95	29131.4
C11H11NO3	(R)-(Indol-3-yl)lactate;	map00380 Tryptophan metabolism		9519.17	5673.65	9790.62	9444.1	20368.5	10490.4	15875.8	8577.32	36453.5
C13H22N2O	Isonoruron;	NULL		1630.75	3875.5	2675.79	2133.68	12087.9	7956.38	16547.7	1873.96	74371
C8H10N4O4	5-Acetylamino-6-formylamino-3-methyluracil; AFMU;	map00232 Caffeine metabolism; map01100 Metabolic pathways; map01110 Biosynthesis of secondary metabolites		360828	224656	328010	397986	473363	384177	460440	351850	558046
C10H16N2O4	(S)-ATPA;	NULL		39334.2	40554.1	43329.5	45630.9	41520.1	42248.5	47630.2	37595.6	60656.8
C9H21O2PS3	Terbufos;	NULL		148283	79308.4	131641	166970	202763	155004	186107	154590	216475
C20H14N4	Porphyrin;	map04080 Neuroactive ligand-receptor interaction		70000.5	69087.3	85321.3	92629.4	91007.9	97067.2	96466	78706.1	96244.1
C10H18O9	Xylobiose;	map02010 ABC transporters		39684.2	25390.9	30819.5	48630.2	51496.6	39358.1	50328.6	43761.1	54864.2
C16H10O7	Wedelolactone;	NULL		83852.8	46682.1	73083	92114.2	110065	86770.9	100055	87445.5	116678
C22H24O6	Schizandrin C; Wuweizisu C;	NULL		68149.1	19513.9	73906.7	78969.2	147298	106147	166463	71198.8	328845
C30H31ClN4O4	Erastin;	map04216 Ferroptosis		14953.1	4419.74	9683.7	21037.2	28789.2	11788.4	27169	13213.7	63309.7
C26H23Cl2N7O4	HR1917; 4',4''-Di-2-imidazolin-2-yl-2-nitroterephthalanilide dihydrochloride;	NULL		22595.2	16110.3	29311.3	32172.6	43825.9	33019.4	37513.6	27620	70851.4
C35H34MgN4O5	Chlorophyllide; Chlorophyllide a;	map00860 Porphyrin and chlorophyll metabolism; map01100 Metabolic pathways; map01110 Biosynthesis of secondary metabolites		2474.25	142.395	5404.05	4167.06	15496.5	10845.2	22251.4	2609.33	61619.2
C16H17N3O	Ergine; Lysergamide;	NULL		22004.1	21047.3	23160.9	22976.1	23939.1	23702.4	23101.1	22453.4	24434.1
C8H18N6O4	Streptidine;	NULL		20125.6	20277.4	21657.1	19611.6	23301.4	33599	21096.7	18766.3	23395.7
C21H21N	Naftifine;	NULL		809.052	302.082	460.79	464.563	357.909	328.19	571.209	2988.15	42865.4
C30H33O20+	Delphinidin 3-O-(6''-O-malonyl)-beta-glucoside-3'-O-beta-glucoside; Delphinidin 3-O-(6''-O-malonyl)-beta-D-glucoside-3'-O-beta-D-glucoside;	map00942 Anthocyanin biosynthesis		359154	512145	200491	663927	534207	390696	640247	488657	581557
C8H10O	4-Methylbenzyl alcohol; alpha-Hydroxy-p-xylene; 4-Tolylcarbinol;	map00622 Xylene degradation; map01100 Metabolic pathways; map01120 Microbial metabolism in diverse environments; map01220 Degradation of aromatic compounds		2836.62	844.053	2280.21	2341.61	2388.98	2374.45	2620.25	1525.16	4012.65
C8H9NO	2-Phenylacetamide; alpha-Phenylacetamide;	map00360 Phenylalanine metabolism; map00643 Styrene degradation; map01120 Microbial metabolism in diverse environments		605986	221280	513276	754480	1.0887e+06	712442	1.1112e+06	628494	2.08678e+06
C9H7NO2	Quinolin-2,8-diol;	NULL		14389.7	9371.08	13361	16169.7	19306.9	14898	20089.9	14251.5	33648.7
C9H7NO	Quinolin-2-ol; 2-Quinolone; 2-Hydroxyquinoline; 2-Quinolinol;	NULL		975572	367343	833673	1.22225e+06	1.7627e+06	1.1624e+06	1.8119e+06	1.02005e+06	3.37603e+06
C7H13NO3	Calystegin A3; Calystegine A3;	map00960 Tropane, piperidine and pyridine alkaloid biosynthesis		25116.7	12522.7	21001.3	29431.7	37153.1	26378.3	40822.8	26296.8	49560
C11H9NO2	3-Indoleacrylate; (2E)-3-(1H-Indol-3-yl)prop-2-enoate;	NULL		1.18348e+07	4.70235e+06	9.40239e+06	1.46101e+07	1.97694e+07	1.26502e+07	1.9189e+07	1.26462e+07	2.87818e+07
C12H13NO3	Aniracetam;	NULL		15695.4	12767.4	14680.7	17359	19512.1	15976.6	19158.5	15155	24169.9
C11H12N2O2	L-Tryptophan; Tryptophan; (S)-alpha-Amino-beta-(3-indolyl)-propionic acid;	map00260 Glycine, serine and threonine metabolism; map00380 Tryptophan metabolism; map00400 Phenylalanine, tyrosine and tryptophan biosynthesis; map00404 Staurosporine biosynthesis; map00901 Indole alkaloid biosynthesis; map00966 Glucosinolate biosynthesis; map00970 Aminoacyl-tRNA biosynthesis; map01060 Biosynthesis of plant secondary metabolites; map01061 Biosynthesis of phenylpropanoids; map010…		63206	39849.7	52157.2	61060.9	73894.8	58667.6	67989.8	59053.8	87914.9
C13H12N4	2-Amino-1-methyl-6-phenylimidazo[4,5-b]pyridine; PhIP;	map05200 Pathways in cancer; map05204 Chemical carcinogenesis; map05215 Prostate cancer		22851.2	15535.5	20203	26669.9	31092.7	23273.7	28499.9	23275.7	32600.4
C10H21NOS	Pebulate;	NULL		19220.6	17164.8	15658.2	17279.2	15343.1	16256.1	13931.3	18127.4	15653.8
C15H13Cl3O2	1,1,1-Trichloro-2-(4-hydroxyphenyl)-2-(4-methoxyphenyl)ethane; Monohydroxymethoxychlor;	NULL		3146.24	598.269	2889.67	4131.09	8396.04	4723.25	8473.08	3464.72	22641.9
C21H28O8	Vernoflexuoside;	NULL		4050.28	837.999	2323.09	4812.88	9371.31	5392.81	6343.37	3637.18	13849.2
C23H24N2O4S	Eprosartan;	NULL		14861.3	13581.8	25401.1	25165.5	31091.6	46034.1	25235	21313.3	37848.1
C16H26N2O14P2	dTDP-L-olivose;	map00522 Biosynthesis of 12-, 14- and 16-membered macrolides; map00523 Polyketide sugar unit biosynthesis; map01130 Biosynthesis of antibiotics		4624.21	1179.5	4269.26	5172.44	13110.3	6602.25	16219.9	4454.24	36559.9
C7H8O	4-Cresol; p-Cresol; 4-Hydroxytoluene; 4-Methylphenol;	map00623 Toluene degradation; map00633 Nitrotoluene degradation; map01100 Metabolic pathways; map01120 Microbial metabolism in diverse environments; map01220 Degradation of aromatic compounds; map04974 Protein digestion and absorption		48568	26749.8	39684.9	55445.5	75400.6	53654.9	74442.9	47957.6	119822
C10Cl12	Mirex;	NULL		668291	36250.4	74472	109539	204411	49413.2	214504	159376	118418
C31H45Cl3N6O13	Victorin C;	NULL		557607	643729	193008	974712	942768	797422	878623	761388	823324
C9H9NO3	Hippurate; Hippuric acid; N-Benzoylglycine; Benzoylaminoacetic acid;	map00360 Phenylalanine metabolism		44232.1	34174	33857.1	58621.1	51997.4	40460	54466.2	42145.6	50265.6
C10H9NO5	7,8-Dihydro-7,8-dihydroxykynurenate;	map00380 Tryptophan metabolism		108284	79112.1	62163.3	112777	112543	81481.4	116753	95471.8	100008
C16H19N2+	6,8-Dimethyl-6,7-didehydroergoline;	map00901 Indole alkaloid biosynthesis; map01130 Biosynthesis of antibiotics		18471.3	17518.7	17377.4	17039.8	16691.5	15799.7	16756.2	18144.6	15624.6
C6H8O6	L-xylo-Hexulonolactone; L-xylo-Hex-2-ulono-1,4-lactone;	map00053 Ascorbate and aldarate metabolism; map01100 Metabolic pathways		204688	155040	170931	250066	327235	282497	255191	170267	205857
C7H14O4	beta-Cymaropyranose; D-Cymarose; Cymarose; 2,6-Dideoxy-3-O-methyl-D-ribo-hexose;	NULL		3312.18	3376.09	3058.71	3093.29	7157.19	25211.9	3010.12	4515.19	8365.79
C6H10N4S	Imetit;	map07227 Histamine H2/H3 receptor agonists/antagonists		5708.35	13732.5	38876.6	5589.62	6978.03	12298.4	5743.7	5158.91	5633.83
C10H12N2O3	Formyl-5-hydroxykynurenamine;	map00380 Tryptophan metabolism		21783	18694.7	17285.2	21274.9	23473.2	20902.3	20675.4	17570.8	19547.1
C13H12O3	NOP; 2-(2-Naphthalenyloxy)propanoic acid; 2-(2-Naphthoxy)propionic acid;	NULL		22354.5	5823.59	6753.23	18644.7	19067.1	7366.67	22462.1	15461.5	17288
C16H12O5	Wogonin; Norwogonin 8-methyl ether;	NULL		84134.6	68165.2	62180.5	85009.9	84096	67419.3	92289.1	72066	75752.1
C16H24O5	Graphinone; Ovalicin;	NULL		1.2587e+06	1.11651e+06	1.1232e+06	1.5338e+06	1.75251e+06	1.34259e+06	1.46629e+06	1.20607e+06	1.56168e+06
C17H14O8	Eupatolitin;	NULL		446357	344980	230491	450427	492543	364414	476411	350994	366396
C16H12O6	Leptosidin;	NULL		219025	212457	170961	261517	293977	226322	258780	222660	228936
C21H20O12	Bracteatin 6-O-glucoside; Bracteatin 6-O-beta-D-glucoside;	map00941 Flavonoid biosynthesis		3.22081e+06	2.72973e+06	2.37875e+06	3.93288e+06	4.29178e+06	3.48595e+06	4.00865e+06	2.71311e+06	2.85516e+06
C17H19N4O11P	8-Carboxy-8-demethylriboflavin 5'-phosphate; 8-Demethyl-8-carboxyriboflavin 5'-phosphate;	map00999 Biosynthesis of secondary metabolites - unclassified		223343	216248	232574	260065	275990	253718	258769	195163	208119
C31H24O10	Aurasperone D;	NULL		6789.1	44817.7	183087	8993.46	12164.6	33973.7	8699.85	5981.73	14685.3
C12H24O17P2	Bis(1L-myo-inositol)-3,1'-phosphate 1-phosphate;	map00562 Inositol phosphate metabolism		76604	69538.2	72868.3	89127.8	89909.8	87762.8	88758.2	66228.6	72672.6
C21H35N7O13P2S	Dephospho-CoA; Dephosphocoenzyme A; 3'-Dephospho-CoA;	map00770 Pantothenate and CoA biosynthesis; map01100 Metabolic pathways		1.75027e+06	1.3509e+06	731048	2.46083e+06	2.58787e+06	1.68134e+06	2.49975e+06	1.95321e+06	2.27546e+06
C10H9NO5	4-(2-Amino-5-hydroxyphenyl)-2,4-dioxobutanoate;	map00380 Tryptophan metabolism		121896	97044.4	91511.4	158660	140227	112233	140191	119769	128629
C11H18N4O2	Pirimicarb;	NULL		457551	421918	394479	462876	481190	405130	449679	419612	440996
C31H34O15	8-Demethyl-8-(2,3,4-tri-O-methyl-alpha-L-rhamnosyl)tetracenomycin C;	map01057 Biosynthesis of type II polyketide products; map01130 Biosynthesis of antibiotics		168637	54243.7	64136.5	191494	238355	150860	171496	129309	184872
C4H4O4	Formylpyruvate;	NULL		11210.3	8256.76	7992.84	11331.8	13651.6	15148.1	12452.3	9597.47	9360.02
C11H9NO4	8-Methoxykynurenate; Xanthurenic acid 8-methyl ether;	map00380 Tryptophan metabolism		28956.7	25254.4	31637.6	21880.8	31664.3	38071.6	23232.9	27797.1	39447.9
C15H25BrO	beta-Snyderol;	NULL		126559	183993	72910.8	151200	147477	116828	131823	189212	180682
C15H18O8	Bilobalide;	NULL		518228	428673	277645	472088	658183	462303	500424	410363	464405
C21H18O12	Luteolin 7-O-glucuronide; Luteolin 7-O-beta-D-glucuronide;	map00944 Flavone and flavonol biosynthesis		74565.9	75788.8	76724.3	131210	141338	118598	114343	101475	108308
C30H34O10	Lappaol C;	NULL		11.4234	4999.92	4224.98	11.0609	30.1656	323.099	14.6332	16.4752	21.8997
C24H30O13	Inumakilactone A glycoside;	NULL		364102	373059	398718	326766	350328	303640	329657	328313	317340
C7H8O3S	Toluene-4-sulfonate; Tosylate;	map00623 Toluene degradation; map01100 Metabolic pathways; map01120 Microbial metabolism in diverse environments; map01220 Degradation of aromatic compounds		38480.5	43932.8	53835.7	33004.1	35665.2	36679.5	141666	34876.8	46481.1
C19H22O2	4-Prenyldihydropinosylvin;	NULL		1643.79	4289.16	8251.14	1567.83	4724.66	28419.7	1481.99	1812.47	3274.59
C15H10O5	Galangin; 3,5,7-Trihydroxyflavone;	map00941 Flavonoid biosynthesis		196049	179920	169507	220599	227325	188305	210184	153232	151595
C17H20O3	2,2-Dimethyl-8-prenylchromene 6-carboxylic acid;	NULL		19123.4	14531	14370.6	19286.5	18693.5	16443.4	20012.1	16357.7	18195.9
C16H29NO5	Butoctamide hydrogen succinate; Butoctamide semisuccinate;	NULL		86045.1	89885.9	86848.3	73969.7	65582.3	57218.9	67684.2	76768.1	66515.8
C15H16O9	Daphnin;	NULL		289989	908652	2.39155e+06	156110	1.0332e+06	2.09186e+06	240420	177717	589128
C21H20O12	Quercetin 3-O-glucoside; Isoquercitrin; 2-(3,4-Dihidroxyphenyl)-3-(beta-D-glucofuranosyloxy)-5,7-dihydroxy-4H-1-benzopyran-4-one; Isotrifoliin;	map00944 Flavone and flavonol biosynthesis; map01100 Metabolic pathways; map01110 Biosynthesis of secondary metabolites		809663	729744	734078	936200	963712	815976	892480	601859	591806
C25H16O12	Griseorhodin A;	NULL		26871.1	44189.4	128883	26254.2	45743.6	86140.7	26352.1	23968.6	42130
C12H12N2O3	Nalidixic acid;	NULL		9289.71	8586.46	9035.93	8758.09	9196.3	10824.5	9136.2	12159.2	29533.1
C19H27NO3	Protoemetine;	map00950 Isoquinoline alkaloid biosynthesis; map01063 Biosynthesis of alkaloids derived from shikimate pathway; map01110 Biosynthesis of secondary metabolites		31526.2	30894.8	27528	28424.7	25238.6	24741.9	26716.9	27213.1	25099.3
C30H26O11	Gambiriin C; Epiafzelechin-(4beta->8)-catechin;	NULL		88100.2	74542.9	39279	75280.5	81098.2	55087.8	72152	69055.6	74785.7
C9H8O3	Caffeic aldehyde; 3,4-Dihydroxycinnamaldehyde; Caffeyl aldehyde;	map00940 Phenylpropanoid biosynthesis; map01110 Biosynthesis of secondary metabolites		6090.64	3799.32	1256.73	5310.31	5331.78	2900.18	4972.71	2843.56	5184.22
C8H16O5	D-Mycinose; 6-Deoxy-2,3-di-O-methyl-D-allo-hexose;	NULL		552.869	547.504	680.63	695.266	843.096	878.198	3727.03	25971.1	48772.5
C10H12O4	Paeonilactone B;	NULL		8816.3	7151.21	3235.81	7975.67	11016.6	6227.09	8428.93	4513.89	7068.94
C16H16O8	5-O-Caffeoylshikimic acid;	map00940 Phenylpropanoid biosynthesis; map00941 Flavonoid biosynthesis; map00945 Stilbenoid, diarylheptanoid and gingerol biosynthesis; map01100 Metabolic pathways; map01110 Biosynthesis of secondary metabolites		14609	14064.2	5683.14	17121	13503	9511.58	15984.3	13428.8	12081.8
C20H24N8O6	5-Formiminotetrahydrofolate; 5-Formimidoyltetrahydrofolate;	map00670 One carbon pool by folate; map01100 Metabolic pathways		18739.7	15320.5	33889.9	25940.6	47083.3	42116.1	21122.3	19794.8	148368
C10H10O3	Coniferyl aldehyde; Coniferaldehyde; 4-Hydroxy-3-methoxycinnamaldehyde; Ferulaldehyde;	map00940 Phenylpropanoid biosynthesis; map01061 Biosynthesis of phenylpropanoids; map01100 Metabolic pathways; map01110 Biosynthesis of secondary metabolites		15422.6	14743.7	13786.4	16452.7	18547.6	16989.1	14913.5	14408.4	17137.5
C13H19NO2	Dioscorine;	NULL		17563.8	13207.2	13538.7	19740.7	15578.2	13101.6	16148	16462	17601.8
C14H20N2O3	Feruloylputrescine; Subaphyllin;	map00330 Arginine and proline metabolism		2092.8	11227.2	56097.5	1460.29	8744.73	91616.9	1384.05	1172.9	2182.29
C16H25N5O15P2	GDP-6-deoxy-D-talose; GDP-6-deoxy-alpha-D-talose;	map00051 Fructose and mannose metabolism; map00520 Amino sugar and nucleotide sugar metabolism		131105	112594	19336	277510	176843	109054	218430	202417	220075
C6H6O3	5-Hydroxymethyl-2-furaldehyde; HMF; 5-Hydroxymethylfurfural;	map00365 Furfural degradation; map01120 Microbial metabolism in diverse environments		39227.8	21244.2	7705.35	33622.3	34351	14626.8	34534.3	24136.7	23646.3
C7H8O4	4-Methyl-3-oxoadipate-enol-lactone;	map00623 Toluene degradation; map01120 Microbial metabolism in diverse environments; map01220 Degradation of aromatic compounds		80249.8	67150.6	63999.4	66792.4	71663.2	48015.9	74640	62119.7	68722.2
C11H12O2	cis-1,2-Dihydroxy-1,2-dihydro-7-methylnaphthalene;	map00626 Naphthalene degradation; map01120 Microbial metabolism in diverse environments		135460	86367.9	29436.2	113104	188998	217248	121901	92701	114667
C9H10O5	(R)-3-(3,4-Dihydroxyphenyl)lactate;	map00350 Tyrosine metabolism		40502.2	28189.9	29291.3	24775.1	45635	40026	29653.4	20378.4	32428.3
C9H9N3O3	Methyl 5-hydroxy-2-benzimidazole carbamate;	NULL		16777.1	8929.09	3922.62	11080.3	15707.3	8650.79	11766.8	8873.17	10438.8
C8H8O7	5-Carboxy-2-oxohept-3-enedioate; 5-Oxopent-3-ene-1,2,5-tricarboxylate;	map00350 Tyrosine metabolism; map01120 Microbial metabolism in diverse environments; map01220 Degradation of aromatic compounds		247.244	10333.2	17111.7	192.284	1075.85	6418.94	267.587	354.29	487.677
C13H14O3	Eupatoriochromene; 1-(7-Hydroxy-2,2-dimethyl-2H-1-benzopyran-6-yl)-ethanone;	NULL		24327.7	16412	9253.15	21900.4	22720.3	14152.5	22982.1	15324	17675.4
C14H14O4	Decursinol;	NULL		706044	470257	170420	576526	626373	347983	635341	484734	558259
C11H16O8	Ranunculin;	NULL		114418	87866.3	44579.6	94578.6	99793.4	68521.3	104467	84686.9	90689.1
C9H16N5O8P	2,5-Diamino-6-(5-phospho-D-ribosylamino)pyrimidin-4(3H)-one; 2,5-Diamino-6-(1-D-ribosylamino)pyrimidin-4(3H)-one 5'-phosphate;	map00740 Riboflavin metabolism; map00790 Folate biosynthesis; map01100 Metabolic pathways; map01110 Biosynthesis of secondary metabolites		339602	238472	111211	289929	304137	205319	304088	248024	268425
C10H22Cl4N2O4	Mannomustine dihydrochloride; Degranol;	NULL		331968	237909	101279	273413	293062	180589	301547	240346	246487
C19H17Cl3N2S	Butoconazole;	NULL		65745.2	48940.7	23558.7	52510.3	52088.9	35146	57084.7	48245.4	48089.8
C29H32FNaO9S	Dexamethazone metasulfobenzoate sodium; Dexamethasone metasulfobenzoate sodium;	NULL		436058	260300	65067.9	315562	320574	190046	375550	271186	289293
C34H32N2O8	Cannabisin B;	NULL		30962.8	16960.1	5001.48	25175.3	24134.5	11799.2	27157.9	16831.9	25964.2
C16H23N5O15P2	GDP-4-dehydro-6-deoxy-D-mannose; GDP-4-dehydro-6-deoxy-D-talose; GDP-4-oxo-6-deoxy-D-mannose; GDP-4-dehydro-D-rhamnose; GDP-4-keto-6-deoxy-D-mannose; GDP-4-dehydro-alpha-D-rhamnose; GDP-4-dehydro-6-deoxy-alpha-D-mannose;	map00051 Fructose and mannose metabolism; map00520 Amino sugar and nucleotide sugar metabolism; map01100 Metabolic pathways		110122	71933.6	24794.7	93728.9	102644	58707.5	101052	72573.4	86313.6
C6H8O3	(4E)-2-Oxohexenoic acid; 2-Oxohex-trans-4-enoate;	NULL		12155.9	9576.88	6103.17	11266.7	11572.3	8593.75	11377.2	9304.75	10427.5
C8H8O2	4-Hydroxyphenylacetaldehyde; 2-(4-Hydroxyphenyl)acetaldehyde;	map00350 Tyrosine metabolism; map00950 Isoquinoline alkaloid biosynthesis; map01060 Biosynthesis of plant secondary metabolites; map01063 Biosynthesis of alkaloids derived from shikimate pathway; map01110 Biosynthesis of secondary metabolites		38631.5	24309.6	27413.7	44021.8	60113.8	40826.7	56821.3	36935.5	96100.8
C7H10O3	4-Oxocyclohexanecarboxylate;	NULL		298883	200594	86250.6	259861	272878	151042	263637	201958	228775
C8H19N	Octylamine; N-Octylamine; Monoctylamine;	NULL		263265	248631	328696	303388	271329	181969	276084	182840	283764
C7H8O4	4-Methylmuconolactone; 4-Carboxymethyl-4-methylbut-2-en-1,4-olide;	map00623 Toluene degradation; map01120 Microbial metabolism in diverse environments		937928	586045	201302	763143	829759	408477	824622	587076	674848
C6H5N3O4	2,4-Dinitroaniline; 1-Amino-2,4-dinitrobenzene;	NULL		15973.7	10751	2240.6	10934.9	12807.8	8388.34	12911.6	9630.89	11330.5
C8H6O5	4-Hydroxyisophthalate; 4-Hydroxy-1,3-benzenedicarboxylate;	map00623 Toluene degradation; map01120 Microbial metabolism in diverse environments		13108.3	10849.8	5460.78	12111.6	12271.4	8524.22	12264.9	10327.6	11127.8
C11H10O4	Eugenin; 2-Methyl-5-hydroxy-7-methoxychromone;	NULL		23240.1	16074.3	11635.9	21492.6	23594.7	17454.3	20500.3	17126	19134.7
C7H6N2O2S2	2-Benzothiazolesulfonamide;	NULL		300710	274057	286030	273443	269961	248705	274756	285345	268483
C10H14N4O2	IBMX; 3-Isobutyl-1-methyxanthine;	NULL		433158	392730	345278	393626	394493	369330	425760	501408	651757
C16H19NO3	Lunacrine;	NULL		10444.2	14885	2396.67	8823.03	24510.8	25593.6	8315.8	14785.6	16771.5
C14H12O3S2	5-(3-Hydroxy-4-acetoxybut-1-ynyl)-2,2'-bithiophene;	NULL		52672.2	36309.5	19094.7	38670.4	40272.6	23223.7	42047.5	29561.5	31091.6
C17H14O6	Irisolidone;	NULL		42490.4	36233.6	36798	56692.9	62861.6	47037.8	53062.7	42376.4	51493.3
C8H14Cl3O5P	Butonate;	NULL		37822.3	21278.9	7424.25	24819.5	25293.9	12588.2	30419.1	19414	24738.2
C14H19NO9S2	Glucotropaeolin; Glucotropeolin; Benzyl glucosinolate;	map00966 Glucosinolate biosynthesis; map01110 Biosynthesis of secondary metabolites; map01210 2-Oxocarboxylic acid metabolism		18764.1	13219.6	8540.66	15932.1	15569.1	10095.6	15302.5	13035.6	11992.6
C20H24O9	Nodakenin;	NULL		1773.74	10400.8	24537.9	905.38	1918.61	8723.78	1103.77	1859.2	2363.48
C21H22O12	Plantagoside;	NULL		82256.9	54186.2	61848	79529.9	88538	76910.9	84489.8	57440.9	59003.8
C27H33N3O7	Verruculogen; TR 1; TR 1 toxin;	map00404 Staurosporine biosynthesis; map01130 Biosynthesis of antibiotics		2013.18	13340.8	17461.2	3457.31	5404.21	14314.1	1533.46	867.559	1813.07
C15H14O5	Phloretin;	map00941 Flavonoid biosynthesis; map01110 Biosynthesis of secondary metabolites		55859.3	47228.5	35491.1	53392.6	49541.5	41353.5	50093.2	41853	43305.8
C22H17ClN2	Clotrimazole;	NULL		59532.2	77844.1	111565	68680.1	77706.1	97664	71846.9	65524.3	78489.3
C8H12O7	(R)-(Homo)2-citrate; (R)-2-Hydroxy-1,2,5-pentanetricarboxylate; (R)-2-Hydroxy-1,2,5-pentanetricarboxylic acid;	map00680 Methane metabolism; map01120 Microbial metabolism in diverse environments; map01210 2-Oxocarboxylic acid metabolism		29566.2	8726.63	8710.39	8432.72	6567.71	10348.8	15879	15002	6251.73
C19H23NO4	(S)-Reticuline; (+)-Reticuline;	map00950 Isoquinoline alkaloid biosynthesis; map01063 Biosynthesis of alkaloids derived from shikimate pathway; map01100 Metabolic pathways; map01110 Biosynthesis of secondary metabolites		14030.8	9108.9	16558.2	20665.8	48295.9	10772.3	53654.9	39187.3	29670.6
C14H10N4O5	Dantrolene;	NULL		115893	105003	97848.2	137274	101763	91696.2	143924	107675	89769.1
C21H24NO4+	(S)-cis-N-Methylcanadine;	map00950 Isoquinoline alkaloid biosynthesis; map01110 Biosynthesis of secondary metabolites		35273.1	33112.3	32781.1	43214.5	38867.6	34905.1	40081.4	38297.7	39779.6
C10H20O	(-)-Citronellol;	map00281 Geraniol degradation		11267.7	8340.32	8313.33	8495.27	23618.8	9716.86	12798.4	12303.9	8425.6
C12H18N4O6S	Oryzalin;	NULL		150763	147448	116268	148850	112465	95442.1	137380	96679.5	68281.2
C16H24O8	8-Epiiridotrial glucoside; Boschnaloside;	NULL		15981.6	12536.9	12078.2	15441.9	13469.2	9586.43	15503.4	10390.4	8397.99
C18H34N4O11	2'-Dehydrokanamycin A; 2'-Oxokanamycin;	map00524 Neomycin, kanamycin and gentamicin biosynthesis; map01130 Biosynthesis of antibiotics		218.912	351.065	831.081	333.324	7364.57	40250.2	266.974	396.078	1059.84
C15H13FO2	Flurbiprofen;	NULL		1601.89	1245.46	999.066	1433.87	2282.95	14334.1	1385.3	1729.2	2598.61
C16H14O4	Strobopinin;	NULL		139672	106096	121053	507372	620818	541899	340928	275979	364934
C15H20O8	Paeonoside;	NULL		709118	934301	1.27172e+06	684289	1.06514e+06	1.0575e+06	797967	754930	886711
C15H20O8	Anisatin;	NULL		844748	1.00644e+06	1.0999e+06	763732	1.11849e+06	897415	832073	630109	602430
C17H13N3O3	CI Pigment Red 3; C.I. Pigment Red 3;	NULL		2443.94	1975.79	2591.34	5937.57	10616.9	10023.6	6289.25	3305.2	7584.62
C16H18N2O5S	Penicillin V;	NULL		223673	251222	326858	248965	297689	294702	251164	232114	272005
C22H18O11	Epigallocatechin 3-gallate;	map04152 AMPK signaling pathway		546521	587252	651599	806238	901857	907674	802358	591273	912863
C13H20N2O	Prilocaine;	NULL		16116.8	14767.3	13448.2	16113.6	15016.1	14881.2	13957.3	14910.9	16249.4
C17H18N2OS	10-(beta-Dimethylaminopropionyl)phenothiazine;	NULL		79269	77375.2	79757.7	91494.4	84323.4	89099.5	85200.6	80434.7	95404.9
C7H4Br2O3	3,5-Dibromo-4-hydroxybenzoate;	map00364 Fluorobenzoate degradation; map01120 Microbial metabolism in diverse environments		7105.73	6944.67	4164.32	6191.11	5171.47	5813.8	5064.66	5084.96	4227.85
C15H13N3O2S	Fenbendazole; Methyl [5-(phenylsulfanyl)-1H-benzimidazol-2-yl]carbamate;	NULL		217159	168256	157399	868287	1.05219e+06	965128	487045	410172	560952
C22H20Cl2N2O3	Benzofenap;	NULL		17359	26371.7	41238.8	18302.3	23677.8	27106.4	18897.3	16772.2	20593.8
C33H32MgN4O3	8-Ethyl-12-methyl-3-vinylbacteriochlorophyllide d;	map00860 Porphyrin and chlorophyll metabolism; map01110 Biosynthesis of secondary metabolites		141.548	119.693	229.004	103.897	107.114	154.854	671.036	13782.4	36898.6
C33H34MgN4O4	8-Ethyl-12-methylbacteriochlorophyllide d;	map00860 Porphyrin and chlorophyll metabolism		279.19	97.6752	503.619	277.362	407.656	467.082	353.987	4534.06	17561.8
C10H8O4	trans-o-Hydroxybenzylidenepyruvate; (3E)-4-(2-Hydroxyphenyl)-2-oxobut-3-enoate;	map00626 Naphthalene degradation; map01100 Metabolic pathways; map01120 Microbial metabolism in diverse environments; map01220 Degradation of aromatic compounds		1164.82	8250.09	61645.4	1172.41	1565.62	5479.27	1461.31	1289.37	1607.18
C16H18O9	Chlorogenate; Chlorogenic acid; Caffeoyl quinic acid; trans-5-O-Caffeoyl-D-quinate;	map00940 Phenylpropanoid biosynthesis; map00941 Flavonoid biosynthesis; map00945 Stilbenoid, diarylheptanoid and gingerol biosynthesis; map01110 Biosynthesis of secondary metabolites		47288.1	122657	528798	56864.6	71145.2	137156	71568.1	55542.3	81793.3
C16H22O10	Geniposidic acid;	map00902 Monoterpenoid biosynthesis; map01110 Biosynthesis of secondary metabolites		74057.3	156859	266367	86760.4	138030	170866	89310.2	89975.4	101811
C15H21N6O8P	(L-Prolyl)adenylate;	NULL		38776.9	46166.7	113645	42325.2	45688.3	56264.9	43765.1	39486	47102.8
C10H12O5	n-Propyl gallate; Propyl gallate;	NULL		17021.4	33898.6	43962.3	19360.4	43824.3	51316.1	17917.5	19540.8	23361.9
C6H14N4O3	N(omega)-Hydroxyarginine; N(omega)-Hydroxy-L-arginine;	map00330 Arginine and proline metabolism; map00999 Biosynthesis of secondary metabolites - unclassified; map01130 Biosynthesis of antibiotics		71662.1	65024.4	55087.3	68287.6	69442.4	62970.3	70910.2	66286.3	63352.3
C13H16N2O4	Formyl-N-acetyl-5-methoxykynurenamine;	map00380 Tryptophan metabolism		7312.12	7569.45	12799.8	8993.44	11544.9	9269.73	40721.7	138660	341307
C27H34O12	Eucommin A; Medioresinol 4'-O-beta-D-glucopyranoside;	NULL		220.079	263.754	852.706	461.625	332.441	639.434	767.288	6117.96	55344.8
C45H38O18	Robinetinidol-(4alpha->8)-catechin-(6->4alpha)-robinetinidol;	NULL		1.88532e+06	1.00427e+06	116519	1.1955e+06	1.40215e+06	899359	1.24874e+06	1.12122e+06	1.22971e+06
C20H25ClO7	Eupachlorin;	NULL		35352.1	38114.1	43280	34900.1	36326.3	42550.7	34769.6	38648.8	36787.4
C6H8O5	3D-3,5/4-Trihydroxycyclohexane-1,2-dione; D-2,3-Diketo-4-deoxy-epi-inositol; (3R,4S,5R)-3,4,5-Trihydroxy-1,2-cyclohexanedione; 3,5/4-Trihydroxycyclohexa-1,2-dione;	map00562 Inositol phosphate metabolism; map01100 Metabolic pathways; map01120 Microbial metabolism in diverse environments		24416.5	26341.7	18082.3	30207.5	15626.6	18361.6	24799.8	35292.5	25198
C7H6O5	Gallate; Gallic acid; 3,4,5-Trihydroxybenzoic acid; 3,4,5-Trihydroxybenzoate; Pyrogallol-5-carboxylic acid;	map00627 Aminobenzoate degradation; map01061 Biosynthesis of phenylpropanoids; map01120 Microbial metabolism in diverse environments		4962.93	10930.7	6960.09	10001.2	6195.58	7857.48	6812.07	8702.22	8423.24
C4H6N4O	5-Amino-4-imidazolecarboxyamide;	map00230 Purine metabolism		14049.5	25409	24960.5	27199	16142.2	19264.6	19661.5	28363.5	26205.9
C15H20N2S	Methaphenilene;	NULL		147689	113169	152623	142237	158786	151304	166317	161408	182985
C15H12ClNO2	Carprofen;	NULL		16515.4	17422.2	19706.2	17698.7	18745.1	21284.4	15580.5	16864.1	23857.2
C22H26O3	3,6-Dimethoxy-19-norpregna-1,3,5,7,9-pentaen-20-one;	NULL		2100.26	5521.81	19862.8	1750.81	2781.17	33854.6	1340.26	1461.79	1722.31
C18H25NO5	Senecionine;	map00960 Tropane, piperidine and pyridine alkaloid biosynthesis; map01064 Biosynthesis of alkaloids derived from ornithine, lysine and nicotinic acid; map01110 Biosynthesis of secondary metabolites		523.597	2438.75	12954.4	1326.85	1076.16	20309	896.049	943.161	2307.14
C18H12O9	Dothistromin;	NULL		30195.3	56789.8	43817.1	60133.4	38995.3	46153.2	40810.1	60285.7	54427.9
C17H26O10	Loganin;	map00902 Monoterpenoid biosynthesis; map01062 Biosynthesis of terpenoids and steroids; map01100 Metabolic pathways; map01110 Biosynthesis of secondary metabolites		70161.5	74918.7	96608.4	85386.8	81011.1	86311.2	71630.1	73995.1	80187.4
C20H30O8	Ptaquiloside; Braxin C;	NULL		1.33547e+06	1.20149e+06	1.50847e+06	1.56425e+06	1.40914e+06	1.61391e+06	1.4172e+06	1.3969e+06	1.41282e+06
C25H30O9	Robustaol A;	NULL		50262.1	56102	80655.4	53645.7	70100.1	72745.2	46309.4	43572.6	64086.2
C16H26N4O10S2	Bis-gamma-glutamylcystine; Oxidized gamma-glutamylcysteine; Bis-gamma-L-glutamyl-L-cystine; Oxidized gamma-L-glutamyl-L-cysteine;	map00480 Glutathione metabolism		78670.3	80278.7	119680	80692.4	96211.4	85852.4	84344.6	73359.3	61606
C7H8O5	2-Oxohept-3-enedioate; 2-Oxohept-3-ene-1,7-dioate;	map00350 Tyrosine metabolism; map01120 Microbial metabolism in diverse environments; map01220 Degradation of aromatic compounds		43675.2	58858.6	40663.6	70385.3	44865.2	45853.5	42918.8	63786	62105.9
C14H14O7	Cyclic dehypoxanthine futalosine;	map00130 Ubiquinone and other terpenoid-quinone biosynthesis; map01110 Biosynthesis of secondary metabolites		20762.2	21949.8	14792.1	30553.7	23904.5	22384.7	23152.9	24822.8	29587.5
C15H14O8	Leucodelphinidin;	map00941 Flavonoid biosynthesis; map01110 Biosynthesis of secondary metabolites		483054	364706	214344	543940	473983	316483	504203	448358	560150
C19H21NO4	(S)-Scoulerine; (13aS)-5,8,13,13a-Tetrahydro-3,10-dimethoxy-6H-dibenzo[a,g]quinolizine-2,9-diol;	map00950 Isoquinoline alkaloid biosynthesis; map01063 Biosynthesis of alkaloids derived from shikimate pathway; map01100 Metabolic pathways; map01110 Biosynthesis of secondary metabolites		15974.7	7595.67	14263.1	15131.3	13055.1	11847.4	12905.7	8348.81	11884.6
C16H31N2O8P	Oseltamivir phosphate;	NULL		70211.9	70375.6	77483.7	80716.6	93269.6	78745.9	56870	54337.8	65206.9
C22H32O8	Nigakilactone H;	NULL		28855.9	31430.8	70754	79657.2	109725	98868.9	48071.4	51313.6	59697.2
C6H8O4	2,3-Dimethylmaleate; Dimethylmaleic acid;	map00760 Nicotinate and nicotinamide metabolism; map01120 Microbial metabolism in diverse environments		6468.38	8702.11	4626.25	8224.31	6867.37	4978.36	4806.99	7295.72	5127.9
C6H6O5	2-Maleylacetate; 4-Oxohex-2-enedioate; Maleylacetate;	map00361 Chlorocyclohexane and chlorobenzene degradation; map00362 Benzoate degradation; map00364 Fluorobenzoate degradation; map00627 Aminobenzoate degradation; map01100 Metabolic pathways; map01120 Microbial metabolism in diverse environments; map01220 Degradation of aromatic compounds		2905.34	3603.68	3106.69	3940.08	2128.19	2894.98	1812.77	4545.15	3810.55
C6H10N4	4-Amino-5-aminomethyl-2-methylpyrimidine;	map00730 Thiamine metabolism; map01100 Metabolic pathways		7889.38	7720.66	9193.74	8152.19	11922.3	16019.7	22825.2	26941.7	40564.7
C12H14N2O2	N-Acetylserotonin; N-Acetyl-5-hydroxytryptamine;	map00380 Tryptophan metabolism; map01100 Metabolic pathways		53449.1	48247.7	49242.6	50945.2	51896.1	50392.4	121622	103927	83382.2
C14H20O7	Salidroside; p-Hydroxyphenethyl alcohol 1-O-beta-D-glucoside; Tyrosol glucoside;	map00350 Tyrosine metabolism		17144.3	19892.4	28279	17727.3	20523.5	26307.6	16337.6	19841.7	23639
C16H14Cl2O2	p,p'-Methoxychlor olefin; 1,1-Dichloro-2,2-bis(p-methoxyphenyl)ethylene; 1,1-Bis(p-methoxyphenyl)-2,2-dichloroethylene;	NULL		4930.26	4048.59	5179.8	5479.52	4427.59	4433.4	4877.89	4631.78	5825.37
C16H19NO7	Indole-3-acetyl-myo-inositol; Indol-3-ylacetyl-myo-inositol; Indole-3-ylacetyl-myo-inositol;	NULL		62272.3	68173.8	76489.3	81794	73569.6	74641.2	83633.4	74603.8	67743
C8H8O5	3,4-Dihydroxymandelate; 3,4-Dihydroxymandelic acid; Dihydroxymandelic acid;	map00350 Tyrosine metabolism; map01100 Metabolic pathways		7503.62	6813.24	4463.03	8083.4	7186.54	5270.53	7157.64	5079.52	8106.43
C20H22N2	Azatadine;	NULL		152.737	439.733	1346.54	209.312	1266.56	17095.3	180.471	281.954	342.669
C24H28O7	Pseudorhodomyrtoxin; psi-Rhodomyrtoxin;	NULL		5085.29	6735.76	27078.8	5947.33	7880.96	8687.2	4394.66	3280.92	5667.62
C8H15NO2	Homostachydrine;	NULL		13882.8	10624	11815.1	14517	10764.3	11677	12844.8	12020.2	12571.6
C3H8N4O2	Methylenediurea;	NULL		151969	162818	174508	169018	181346	136316	190299	142351	128549
C9H17NO3	(E)-2-Butenyl-4-methyl-threonine; 2-Butenyl-4-methylthreonine;	NULL		33337.5	28062.9	27399.2	30260	27187.8	41781.1	31087.6	29655.2	39354.7
C15H16N4O3S	(L-Cysteinylglycine-S-yl)(1H-indol-3-yl)acetonitrile;	NULL		395818	178743	171186	329706	347581	236490	397505	270524	300149
C16H16O9	4-Methylumbelliferone glucuronide; 4-Methylumbelliferyl glucuronide;	NULL		66689.9	76755.4	97940.5	75619.3	84350.1	86203	87326.8	72157.9	84626.2
C19H28O11	Zizybeoside I;	NULL		191112	712990	2.21135e+06	204708	286572	334263	195212	181747	267718
C25H24O7	Sanggenon A;	NULL		31339.7	28869.6	31379.7	35256.6	30046	27021	36662.9	28924.7	31988.2
C17H28N2O15P2	dTDP-5-dimethyl-L-lyxose; dTDP-4-O-demethyl-beta-L-noviose;	map00401 Novobiocin biosynthesis; map00523 Polyketide sugar unit biosynthesis; map01130 Biosynthesis of antibiotics		144322	152122	204174	141093	154854	147290	150842	126832	101744
C24H16F6N4O2	Metaflumizone;	NULL		48429.5	80431.1	67074.6	79921.3	92810	101014	77478.2	89739.7	94198.2
C17H24O9	Syringin; Eleutheroside B;	map00940 Phenylpropanoid biosynthesis		65003.9	57220.4	84941.3	72898.6	85548.2	90545.8	68052.8	65944.8	89842.7
C15H18O8	trans-beta-D-Glucosyl-2-hydroxycinnamate; beta-D-Glucosyl-2-coumarate;	map00940 Phenylpropanoid biosynthesis; map01110 Biosynthesis of secondary metabolites		89434.7	89247.5	90646.5	124224	216480	132287	124359	113306	276009
C15H18O9	Caffeic acid 3-glucoside;	NULL		221841	348222	325517	174162	277623	373221	162098	144147	180539
C11H22N2O4S	Pantetheine; (R)-Pantetheine;	map00332 Carbapenem biosynthesis; map00770 Pantothenate and CoA biosynthesis; map01130 Biosynthesis of antibiotics		261271	104013	218656	280107	285304	215769	354978	254153	254496
C16H22N2O6	Aziridyl benzoquinone; Benzoquinone aziridine;	NULL		167530	61315.1	141528	241670	238710	142802	280480	187589	211886
C18H19NO3	Tuduranine;	NULL		48557.2	47050.1	65452.3	52745.3	50135.5	72906.5	51539.8	60372.5	79385.7
C17H16O8	1,2,3,4-Tetrahydro-alpha,7-dihydroxy-beta-(hydroxymethyl)-9-methoxy-3,4-dioxocyclopenta[c][1]benzopyran-6-propanal;	map00980 Metabolism of xenobiotics by cytochrome P450		26662	22161.5	21644.8	42499	70437.8	39222.2	39408.9	32740	86967.1
C20H22N2S	Mequitazine;	NULL		114834	196228	356479	118647	162834	213758	127407	124166	153467
C17H18N4O5	202-791; PN 202-791;	NULL		16056.6	26227.1	100369	18603	24571.4	33379.7	16367.2	16669	24463.5
C21H27N3O3S	E-4031;	map07232 Potassium channel blocking and opening drugs		8682.23	31443	146398	10443.8	15407.7	25625.1	7196.02	8701.39	13061.9
C10H12O4	2,3-Dihydroxy-p-cumate;	map00622 Xylene degradation; map01120 Microbial metabolism in diverse environments; map01220 Degradation of aromatic compounds		2862.06	13398.5	30536.7	3341.97	5323.01	14605.8	4372.05	5168.65	7591.77
C8H14N2O4S	Phenelzine sulfate;	NULL		67080.3	27394	60349.3	110452	95179.8	51382.6	107452	75795	100964
C14H19NO6S	Desulfoglucotropeolin;	map00966 Glucosinolate biosynthesis; map01110 Biosynthesis of secondary metabolites; map01210 2-Oxocarboxylic acid metabolism		43756.3	29982.4	45061.1	66074.2	61542.1	44964	63190.8	51783.8	65465.5
C14H16F3N3O4	Profluralin;	NULL		9287.37	4776.34	13516.1	17928.9	18925.7	10226.4	20020.9	12550.5	18771.2
C10H14O3	Iridotrial; (1S,2R,3S)-2-Formyl-alpha-(hydroxymethylene)-3-methylcyclopentaneacetaldehyde;	map00902 Monoterpenoid biosynthesis; map01100 Metabolic pathways; map01110 Biosynthesis of secondary metabolites		16744.1	19449.8	28324.9	15515.5	19046.7	26766.8	14854.6	16507.6	23718.1
C4H7O5P	Deamino-alpha-keto-demethylphosphinothricin; 4-(Hydroxyphosphinyl)-2-oxobutyric acid; 2-Oxo-4-phosphinobutanoate; 4-Hydrohydroxyphosphoryl-2-oxobutanoate;	map00440 Phosphonate and phosphinate metabolism; map01130 Biosynthesis of antibiotics		43501.3	42901.6	41906	41847.5	41013.4	38574.2	39281.5	43460.5	33830.2
C13H13ClN4O2S	Cyazofamid;	NULL		15909.8	15063.5	5916.5	38969.1	32012.4	12160.8	27332.2	20317.4	24633.7
C7H17N4O7P	1D-1-Guanidino-3-amino-1,3-dideoxy-scyllo-inositol 4-phosphate;	NULL		37612.5	43507.1	77849.6	64897.7	69364.5	68544.3	57531.9	50406.8	63223.2
C12H11NO4	2-Hydroxy-6-oxo-(2'-aminophenyl)-hexa-2,4-dienoate;	map00621 Dioxin degradation; map01100 Metabolic pathways; map01120 Microbial metabolism in diverse environments; map01220 Degradation of aromatic compounds		12805.5	12127	26155.3	15634.1	34776.3	26825.3	16389.2	11374.1	13558.3
C17H20O3	Methallenestrilphenol; N-3-(6-Hydroxy-2-naphthyl)-2,2-dimethylpentanoic acid; alpha,alpha-Dimethyl-beta-ethylallenolic acid; beta-Ethyl-6-hydroxy-alpha,alpha-dimethyl-2-naphthalenepropanoic acid;	NULL		114064	88229.7	126998	126813	130320	102603	118848	116577	165128
C18H20O4	Toxyl angelate;	NULL		59347.2	52693.7	73723.4	59894.2	61002.4	85120.1	58963.2	52547.4	63160.5
C19H23NO3	Ethylmorphine;	NULL		363757	107122	108640	393313	293155	114463	421328	157906	313864
C17H18N2O6S	Carbenicillin;	NULL		63801.3	56905.7	76217.4	79004.4	110457	97953.2	79582.7	63135.9	109437
C17H24O11	Gardenoside;	NULL		149200	96946.5	129623	197877	241686	164378	203702	124340	174192
C25H23FNO4-	Pitavastatin; (3R,5S,E)-7-(2-cyclopropyl-4-(4-fluorophenyl)quinolin-3-yl)-3,5-dihydroxyhept-6-enoate;	map07024 HMG-CoA reductase inhibitors		83325.5	67728.7	86283	108021	104139	80631.9	98065.1	96105.2	119520
C30H26O13	Tribuloside;	NULL		118637	108898	207035	120974	99806.4	76418	103364	104098	107309
C11H12O5	2-Benzylmalic acid; 2-Benzylmalate;	map00400 Phenylalanine, tyrosine and tryptophan biosynthesis; map01210 2-Oxocarboxylic acid metabolism		48942.7	36451.2	42361.1	54980.4	62317.7	50453.1	53105.8	41734.1	56345.2
C16H12N2O3	1-(4-Hydroxyphenylazo)-naphthalene-2,6-diol; 4',6-diOH-Sudan I;	map05204 Chemical carcinogenesis		14200.8	10805.7	13483.6	12700.8	12719.9	13759.7	12920.1	9544.43	19130.6
C26H37NO8S2	Tiapamil;	NULL		1599.54	1514.88	3639.87	1864.12	1818.38	2703.01	7045.1	39306.9	111046
C15H12N2O2	Oxcarbazepine;	map00982 Drug metabolism - cytochrome P450		1728.92	963.334	834.092	1595.6	3088.37	16220.9	1971.05	1222.67	3117.44
C20H22O4	Uncinatone;	NULL		16171.5	14585.4	22124.4	15241.1	16652.1	25362.6	17270.9	15895.9	16294.8
C16H24O11	Shanzhiside;	NULL		91379.9	88400.6	121753	110991	126614	167344	126055	89967.2	204658
C26H34O14	Decuroside III;	NULL		70000.2	95367.8	107669	92740.4	136028	106121	77093.5	70587.6	95269.7
C27H36O15	Loganin pentaacetate;	NULL		41709.4	29829.2	16645.1	152112	187443	126635	109199	98438.6	119712
C31H45N6O16P	5,10-Methylenetetrahydromethanopterin; N5,N10-Methylenetetrahydromethanopterin;	map00680 Methane metabolism; map01100 Metabolic pathways; map01120 Microbial metabolism in diverse environments; map01200 Carbon metabolism		2118.76	2816.54	4113.26	5414.16	6677.09	5381.7	5867.93	17093.1	66612
C6H12O9S	D-Galactose 6-sulfate;	NULL		11726.3	14715.4	30805.8	6211.73	4792.52	16429.2	7734.33	32203.7	53618.1
C18H19NO6	Candimine;	NULL		13212.6	13878.2	24316.7	17485.9	19702.8	17616.6	18770.9	17601.1	17126.8
C16H22O10	Secologanate;	map00902 Monoterpenoid biosynthesis; map01110 Biosynthesis of secondary metabolites		31435	25739.7	33968.8	34228.5	32087.4	26719.7	39433.8	27939.3	26951.2
C11H8	5-Phenyl-1,3-pentadiyne;	NULL		14521.9	8825.86	8913.47	9028.64	41840.6	53304.1	8924.94	11677.4	35942.4
C7H8O3	4-Hydroxymethylcatechol; 3,4-Dihydroxybenzyl alcohol;	map00626 Naphthalene degradation; map01120 Microbial metabolism in diverse environments		59352.8	55619.3	54718.3	51343.9	44635.1	70616	59021.6	47326.8	53767.5
C8H8O5	3-O-Methylgallate; 3-O-Methylgallic acid;	map00627 Aminobenzoate degradation; map01120 Microbial metabolism in diverse environments		70412.2	73664.8	57129.4	68389.9	58994.1	70492.4	76964.1	68055.2	64389.7
C7H12O5	alpha-Isopropylmalate; (2S)-2-Isopropylmalate; (2S)-2-Hydroxy-2-isopropylsuccinic acid; 2-Isopropylmalic acid; 3-Carboxy-3-hydroxy-4-methylpentanoate; 3-Carboxy-3-hydroxyisocaproate;	map00290 Valine, leucine and isoleucine biosynthesis; map00620 Pyruvate metabolism; map01100 Metabolic pathways; map01110 Biosynthesis of secondary metabolites; map01210 2-Oxocarboxylic acid metabolism; map01230 Biosynthesis of amino acids		287771	530670	1.42112e+06	134122	141622	636879	102479	862863	2.70658e+06
C15H14O5	Ptaerochromenol;	NULL		39935	29080.7	17436	37523	36195	22894.6	39658.3	31460.9	37345.8
C15H10O2	Phenanthrene-4-carboxylate; 4-Phenanthroic acid;	map00624 Polycyclic aromatic hydrocarbon degradation; map01120 Microbial metabolism in diverse environments		7264.59	10744.2	26645.4	4581.61	5003.95	12639.3	4423.11	15834.2	41175.6
C18H12Cl2N2O	Boscalid;	NULL		99687.8	32165.5	11610	80712.9	111214	35786	108773	51845.2	72069
C21H29NO	Biperiden;	NULL		13377.4	13031.9	15386.3	13718.9	14984.4	16911	11765.1	11887.7	17024.4
C19H18O8	Chrysosplenetin; Chrysosplenetin B; Quercetagetin 3,6,7,3'-tetramethyl ether;	NULL		12122.2	11971.8	27703.6	13735	35562.1	121977	13312.6	14675.5	29749.1
C18H15ClFNO3	Flumipropyn; S-23121;	NULL		45508.1	15362.3	1999.53	42007.8	58532.4	18752.1	52965.2	26634.2	46889.5
C28H24O5	Marchantin A;	NULL		49162.5	130888	226116	48691.2	137486	138202	32577.9	50209.5	101461
C13H18N2O4S	PS-5; Antibiotic PS 5;	NULL		5696.81	5643.06	9346.73	20463	41100.7	17675.8	22768.5	52096.6	53182.9
C8H6O6	4,5-Dihydroxyphthalate; 4,5-Dihydroxyphthalic acid;	map00624 Polycyclic aromatic hydrocarbon degradation; map01100 Metabolic pathways; map01120 Microbial metabolism in diverse environments; map01220 Degradation of aromatic compounds		13536.7	2942.76	736.989	10495.1	15278.9	3471.9	11982.1	4369.69	6927.97
C13H10O5	2,3',4,6-Tetrahydroxybenzophenone;	NULL		44211.9	33570.8	27675.7	38989.4	42017.4	34226.1	41219	33207.9	38343.8
C13H16N2O3	6-Hydroxymelatonin;	map00380 Tryptophan metabolism		349.93	277.031	513.935	429.316	649.77	891.803	366.645	2774.68	20516.9
C14H10O5	Isogentisin; 1,3-Dihydroxy--7-methoxyxanthone;	NULL		17842.5	7555.74	4351.26	16575.6	21994.5	10919.6	18928.3	12119.3	16503.7
C12H16O7	Arbutin; Ursin; Uvasol; Hydroquinone-O-beta-D-glucopyranoside;	map00010 Glycolysis / Gluconeogenesis; map02060 Phosphotransferase system (PTS)		127155	112548	102820	126201	119487	104913	128414	122202	125789
C14H10O6	Athyriol; 3-Methoxy-1,6,7-trihydroxyxanthone;	NULL		33058.3	12677.5	6775.67	29100.1	36513.2	17897.2	34536.6	18908.3	26091.2
C14H9N4NaO5	Dantrolene sodium anhydrous;	NULL		40091.9	27760.8	8182.46	47260.8	57255.6	32297.4	54358.2	35105.7	42244.5
C15H12O8	Dihydromyricetin; Ampelopsin; (+)-Dihydromyricetin; (+)-Ampelopsin;	map00941 Flavonoid biosynthesis; map01110 Biosynthesis of secondary metabolites		304800	75120.7	16588.2	243599	340350	121950	327911	139254	217520
C17H14O7	(+)-Bisdechlorogeodin;	NULL		31228.9	24872.7	34358.2	49817.3	47766.5	37886.4	43106.6	42730.6	67900.5
C17H12O6	Aflatoxin B1;	map00254 Aflatoxin biosynthesis; map00980 Metabolism of xenobiotics by cytochrome P450; map01130 Biosynthesis of antibiotics; map05204 Chemical carcinogenesis; map05225 Hepatocellular carcinoma		43875	24278.1	23680.4	42541	47485.9	32510.9	44659.7	35118.9	42574.3
C14H13AlCaN2O8	Aluminoparaaminosalicylate calcium; Alumino-p-aminosalicylic acid calcium salt;	NULL		35871.8	9117.15	898.686	27887.5	38633.2	9301.58	37298.2	15263.6	19748.2
C23H31FO5	Flurogestone acetate; 9alpha-Fluoro-11-hydroxy,17alpha-acetoxyprogesterone; 9-Fluoro-11beta,17-dihydroxypregn-4-ene-3,20-dione 17-acetate;	NULL		65947.6	50827.6	53117.2	92099.8	70651.8	71238.5	85614.8	85433.5	79464.2
C27H30O8	Daphnetoxin;	NULL		14368.3	45596.9	96125.2	13349.8	29855.6	76659.2	13849.1	14939.7	26372.2
C15H14O6	Ptaeroglycol;	NULL		23323.7	6637.47	3184.32	24958.9	23288.5	8595.88	25459.1	17246.6	24025.6
C15H12O7	Taxifolin; Dihydroquercetin; (+)-Dihydroquercetin; (+)-Taxifolin; trans-Dihydroquercetin;	map00941 Flavonoid biosynthesis; map01061 Biosynthesis of phenylpropanoids; map01100 Metabolic pathways; map01110 Biosynthesis of secondary metabolites		38660.9	35606.8	38417.9	45122.8	50475.3	48237.5	44432.3	43294	55313
C21H22O11	2',3,4,4',6'-Peptahydroxychalcone 4'-O-glucoside; PHC 4'-O-glucoside; 2',3,4,4',6'-Pentahydroxychalcone 4'-O-beta-D-glucoside;	map00941 Flavonoid biosynthesis		754234	735328	507698	634209	763257	536410	715360	673978	728441
C14H26N4O11P2	CDP-choline; Cytidine 5'-diphosphocholine; Citicoline;	map00564 Glycerophospholipid metabolism; map01100 Metabolic pathways; map05231 Choline metabolism in cancer		48256.7	43904.3	38356.3	50164.7	63847.5	54325	55334	48728.8	81317.5
C8H10O4	Penicillic acid;	NULL		12275.4	1291.07	833.586	5658.65	7061.43	1191.74	9664.53	3394.83	5012.4
C14H16O7	Dehypoxanthine futalosine;	map00130 Ubiquinone and other terpenoid-quinone biosynthesis; map01110 Biosynthesis of secondary metabolites		14169.9	14900.7	18465.5	15147.6	16416.6	16351	16389.2	17159.6	12952.1
C28H28N2O2	Difenoxin;	NULL		353.449	269.913	291.987	232.88	188.854	676.422	4026.36	4856	11264
C23H24O5	2,2-Dimethyl-3-[4-(acetyloxy)phenyl]-4-ethyl-2H-1-benzopyran-7-ol acetate; 4-Ethyl-3-(p-hydroxyphenyl)-2,2-dimethyl-2H-1-benzopyran-7-ol diacetate;	NULL		12665.8	27792.2	37207.8	17186.7	16384.4	19728.6	14197.8	16298	23229.4
C11H12N2	Deoxypeganine; 3-Deoxyvasicine;	NULL		10478.6	12386.8	11601.6	8778.94	13543.7	9992.17	21074.1	11428.7	9927.82
C8H18N2O3S	Buthionine sulfoximine; S-Butyl-DL-homocysteine-[S,R]-sulfoximine;	NULL		38000.2	42805.2	60966.8	34470.4	43653.6	75487.7	33386.4	47744.6	80287.1
C13H18N4O3	Pentoxifylline;	NULL		235825	242525	271856	299566	265212	280277	256787	248538	206115
C20H24O10	Rutarin;	NULL		204702	43778.1	44998.2	76354.7	138879	55318.8	166216	89759.6	94077.3
C9H8O4	3-(4-Hydroxyphenyl)pyruvate; 4-Hydroxyphenylpyruvate; p-Hydroxyphenylpyruvic acid;	map00130 Ubiquinone and other terpenoid-quinone biosynthesis; map00261 Monobactam biosynthesis; map00350 Tyrosine metabolism; map00400 Phenylalanine, tyrosine and tryptophan biosynthesis; map00401 Novobiocin biosynthesis; map00950 Isoquinoline alkaloid biosynthesis; map01055 Biosynthesis of vancomycin group antibiotics; map01060 Biosynthesis of plant secondary metabolites; map01063 Biosynthesis o…		718652	43670	10231.2	563287	92816.6	26568.3	460171	167786	567534
C11H23N2O7PS	Pantetheine 4'-phosphate; 4'-Phosphopantetheine; Phosphopantetheine; D-Pantetheine 4'-phosphate;	map00332 Carbapenem biosynthesis; map00770 Pantothenate and CoA biosynthesis; map01100 Metabolic pathways; map01130 Biosynthesis of antibiotics		71359.9	70488.7	80953	69218.2	75056.9	60189.3	59468.7	64084.3	63789.3
C8H13NO4	N2-Acetyl-L-aminoadipate semialdehyde;	NULL		10665.2	10255.4	12422.7	10570.8	11017.8	11847.1	11703.6	15886.6	24425.3
C9H16O2	Chalcogran;	NULL		13928.1	12230.5	18498.2	14995.4	12925.8	20416.3	13603.3	13032.6	14004.4
C15H16O2	Bisphenol A; 2,2-Bis(4-Hydroxyphenyl)propane;	map00363 Bisphenol degradation; map01100 Metabolic pathways; map01120 Microbial metabolism in diverse environments		54.9018	138.535	112.854	112.397	149.347	162.886	4144.79	5340.43	6677.04
C15H24O2	Capsidiol;	map00909 Sesquiterpenoid and triterpenoid biosynthesis		2450.06	2312.35	5715.39	1605.74	2295.29	2417.45	3780.02	9787.07	33561.8
C17H20N4S	Olanzapine;	NULL		325611	304162	375653	373709	433009	720364	402320	519933	1.92381e+06
C14H15NO7	Isotan B;	NULL		21687.5	21376.4	37824.4	21772.4	27111.3	29818.4	24054.7	24050.2	34372.5
C16H14O4S2	5-(3,4-Diacetoxybut-1-ynyl)-2,2'-bithiophene;	NULL		22404.4	13313	15351	21236.3	18782.7	16796.1	21485.8	14993.3	21957
C7H13O10P	2-Dehydro-3-deoxy-D-arabino-heptonate 7-phosphate; 3-Deoxy-D-arabino-hept-2-ulosonate 7-phosphate; 3-Deoxy-arabino-heptulonate 7-phosphate; 3-Deoxy-D-arabino-heptulosonic acid 7-phosphate; DAHP; 2-Dahp;	map00400 Phenylalanine, tyrosine and tryptophan biosynthesis; map01070 Biosynthesis of plant hormones; map01100 Metabolic pathways; map01110 Biosynthesis of secondary metabolites; map01130 Biosynthesis of antibiotics; map01230 Biosynthesis of amino acids		42697.9	36752.9	39615.1	38178.1	45132	40488.1	46017.1	35931.6	38740.5
C16H25NO4	Serratanidine;	NULL		51444	24559.7	46868.4	62509.9	75197	38652.1	89270.4	57307.4	130230
C14H14ClN2O3PS	Azothoate;	NULL		15795.4	12604.9	10518.2	16159.2	19026.6	12049.5	17877.3	12869.5	14213.4
C19H15NO5	Atheroline;	NULL		26778.9	51256.3	165913	31034.8	35837.1	40574.6	33114.9	44186.2	70070
C19H24N2OS	Methotrimeprazine; Levomepromazine;	NULL		76742.1	68488.7	78228	83732.7	84066.7	72109.7	80921.4	73433.5	77794.2
C17H29N3O13P2	dTDP-L-epivancosamine; dTDP-beta-L-4-epi-vancosamine; dTDP-3-amino-2,3,6-trideoxy-3-methyl-beta-L-arabino-hexopyranose;	map01055 Biosynthesis of vancomycin group antibiotics; map01130 Biosynthesis of antibiotics		125726	72890.2	90021	90693.9	82751.1	63399.6	76505.3	65921.4	68848.2
C13H19ClN2O2	Chloroprocaine;	NULL		62287.2	244601	926368	55374.8	78829.8	89771.7	60366	56791.8	125745
C12H14N4O4S2	Thiophanate-methyl; 1,2-Di-(3-methoxycarbonyl-2-thioureido)benzene;	NULL		745.726	2623.87	13207	694.449	813.891	1359.49	552.658	504.959	995.285
C24H12O2	Vat Yellow 4; C.I. Vat Yellow 4; Dibenzo[b,def]chrysene-7,14-dione;	NULL		3467.63	19184.7	89313.7	3242.05	5237.7	6616.26	3676.5	3179.3	4140.43
C16H15F3N2O4	Bay-K-8644; BayK8644;	NULL		19046.1	29560.7	83722.2	21754.5	25838.2	29920.2	20368.1	20899.1	30957.5
C20H14O5	19-Hydroxy-8-O-methyltetrangulol;	map01057 Biosynthesis of type II polyketide products; map01130 Biosynthesis of antibiotics		399.332	2444.96	11630.2	434.317	669.88	963.819	513.892	459.055	473.952
C20H24O10	Ginkgolide B;	NULL		262580	477757	740653	277324	350301	305846	246472	234424	218897
C10H15N5O	Dihydrozeatin; 2-Methyl-4-(1H-purin-6-ylamino)butan-1-ol; N6-(4-Hydroxyisopentanyl)adenine;	map00908 Zeatin biosynthesis; map01110 Biosynthesis of secondary metabolites; map04075 Plant hormone signal transduction		5847.91	5268.5	5405.01	4761.87	4562.49	7360.74	4759.89	5906.13	7101.21
C3H7NO2Se	L-Selenocysteine;	map00450 Selenocompound metabolism; map01100 Metabolic pathways		29951.6	29002.7	31230.8	28057.9	28579.3	36417.2	30986.7	30620.4	33703.7
C10H9N5O	Kinetin; 6-Furfuryladenine;	NULL		12450.7	27871.7	57329	12799.8	12649.4	20868.3	24952.9	31408.1	47650.2
C12H10O6	2-Hydroxy-6-oxo-6-(2-hydroxyphenoxy)-hexa-2,4-dienoate;	map00621 Dioxin degradation; map01100 Metabolic pathways; map01120 Microbial metabolism in diverse environments; map01220 Degradation of aromatic compounds		35588.8	77101	50606.1	62811.5	50796.5	69453.6	66046	83132.8	69087.7
C17H19NO5	Haemanthidine; Hemanthidine;	NULL		5814.77	9171.33	30581.9	7344.81	7834.16	10902.8	6336.31	7321.07	9218.48
C13H28N4O7	Fortimicin KL1;	map01130 Biosynthesis of antibiotics		17374	24807.1	61146	9905.65	19840.6	23026.9	11181.7	7808.87	12904.5
C25H24N4O2	GF 109203X; Bisindolylmaleimide I;	NULL		412709	382545	657089	526624	689197	996154	555070	343644	701105
C25H24O5	Osajin;	NULL		30075.4	44242.8	74533.3	35959.6	44750.5	55715.9	37553.5	28099.1	46421.6
C28H37NO3	Paspaline B;	map00403 Indole diterpene alkaloid biosynthesis; map01110 Biosynthesis of secondary metabolites		8107.16	6540.54	7187.63	8335.56	7760.35	9831.53	9005.65	17588.3	48191.7
C27H34O9	Verrucarin A; Muconomycin A;	NULL		11155.8	8445.48	21678.3	13579	22299	31444.8	18624.7	10438.9	25156.5
C10H13ClN2O2	Metoxuron; Dosanex;	NULL		24193.9	31678.6	36376.2	33368.6	29616.9	38328.9	29981	33790.9	32891.5
C14H15N3O	4-(Dimethylamino)phenylazoxybenzene;	NULL		5224.56	28667.6	62857.5	6145.18	5595.84	5328.08	5836.25	4627.3	6747.33
C11H19NO6	Lotaustralin;	map00460 Cyanoamino acid metabolism; map01110 Biosynthesis of secondary metabolites		8532.28	5503.88	9379.52	9146.72	10244.7	11519.5	15612.8	12898.4	17801.4
C18H18ClNO5	Benzoximate;	NULL		33063.8	57807	72416.8	62888.2	65263.5	109515	55567.3	63848.5	67777.2
C22H16F3N3	Fluotrimazole;	NULL		46976.1	50753.2	62148.5	54449.5	56347.3	66170.5	47038.3	53059.1	64439.2
C25H32O11	Gibberellin 2-O-beta-D-glucoside;	NULL		7977.93	14059.3	26169.9	22258.9	41882.6	44414.1	24324.1	18920.5	38708.5
C30H27O15+	Delphinidin 3-O-(6-caffeoyl-beta-D-glucoside);	map00942 Anthocyanin biosynthesis		75491.1	37691.4	48192	54566.3	57014	46562.8	64272.1	52233.7	62346.8
C17H22O4	1-Dehydro-[6]-gingerdione;	map00945 Stilbenoid, diarylheptanoid and gingerol biosynthesis; map01110 Biosynthesis of secondary metabolites		5310.59	7632.85	30773.5	2445.48	6062.76	8440.71	1871.17	1482.33	7702.81
C17H21N5O6	8-Demethyl-8-(methylamino)riboflavin;	map00999 Biosynthesis of secondary metabolites - unclassified		487531	504715	420857	574953	639220	513986	533443	437991	343793
C10H8O3	1,3,8-Naphthalenertriol; 1,3,8-Trihydroxynaphthalene;	NULL		10125.7	10514.3	10245.2	9994.04	9675.14	10591.3	11262.8	13980.9	17115.3
[truncated: 1,580 more rows]

## Sheet: Neg
#	.Pathway	Count	All metbolites with pathway annotation (Count.All)	Pvalue	Pathway.ID
12	Amino sugar and nucleotide sugar metabolism	38	108	2.04763e-06	map00520
4	Flavonoid biosynthesis	36	74	1.56574e-10	map00941
1	Galactose metabolism	35	46	8.12036e-19	map00052
8	Tyrosine metabolism	34	78	1.76486e-08	map00350
7	Phenylpropanoid biosynthesis	31	66	8.50213e-09	map00940
3	Pentose and glucuronate interconversions	30	55	1.40447e-10	map00040
11	Phenylalanine metabolism	30	72	4.00674e-07	map00360

## Sheet: Positive
#	.Pathway	Count	All metbolites with pathway annotation (Count.All)	Pvalue	Pathway.ID
2	Sesquiterpenoid and triterpenoid biosynthesis	57	88	1.12624e-19	map00909
4	Isoquinoline alkaloid biosynthesis	56	122	1.27511e-10	map00950
1	Limonene and pinene degradation	47	64	5.90879e-20	map00903
3	Monoterpenoid biosynthesis	40	58	1.2238e-15	map00902
7	Phenylalanine metabolism	37	72	3.73289e-09	map00360
10	Flavonoid biosynthesis	32	74	5.55715e-06	map00941
8	Phenylpropanoid biosynthesis	31	66	8.95309e-07	map00940
11	Tyrosine metabolism	31	78	5.74951e-05	map00350

## Sheet: KEEG 00350
Formula	Mock 0d	Mock 6d	Mock 12d	Control 0d	Control 6d	Control 12d	Melatonin 0d	Melatonin 6d	Melatonin 12d	Description
C9H13NO3	10393.1	78167.2	6027.06	15669.9	23243.7	23627.9	12381.2	12475.9	17261.4	L-Normetanephrine;
C8H11NO2	1900.64	20511.5	643.94	1392.53	7126.2	8256.92	1423.71	1159.51	1726.99	Dopamine; 4-(2-Aminoethyl)-1,2-benzenediol; 4-(2-Aminoethyl)benzene-1,2-diol; 3,4-Dihydroxyphenethylamine; 2-(3,4-Dihydroxyphenyl)ethylamine;
C15H11I4NO4	4.78408e+06	4.44998e+06	4.37996e+06	4.55788e+06	4.50853e+06	4.31657e+06	4.65801e+06	4.575e+06	4.4742e+06	Thyroxine; Levothyroxin; L-Thyroxine; O-(4-Hydroxy-3,5-diidophenyl)-3,5-diiodo-L-tyrosine; 3,5,3'5'-Tetraiodo-L-thyronine; T4;
C8H5NO2	9180.58	9188.48	9048.93	9099.85	8687.93	8481.36	8886.69	9149.31	8927.9	Indole-5,6-quinone;
C13H15NO6	1.43207e+06	1.36754e+06	1.36518e+06	1.35166e+06	1.32264e+06	1.29892e+06	1.37588e+06	1.37993e+06	1.35701e+06	4-Hydroxyphenylacetylglutamic acid; p-Hydroxyphenylacetylglutamic acid; 4-Hydroxyphenylacetylglutamate; p-Hydroxyphenylacetylglutamate;
C10H15NO3	795.712	4329.03	3717.24	383.596	4720.34	97615.4	734.652	2059.23	481.922	L-Metanephrine;
C8H10O2	95571.6	313656	36486	84044.8	518168	782304	102043	89756.4	184946	4-Hydroxyphenylethanol; Tyrosol;
C8H10O4	17409.3	8501.92	3643.05	13928.8	15597.4	7093.65	14026.1	10798.1	12978.3	3,4-Dihydroxyphenylethyleneglycol;
C9H8O5	164986	22421.4	2738.99	163237	197733	54049.4	189945	83454.4	122370	3-(3,4-Dihydroxyphenyl)pyruvate; 3,4-Dihydroxyphenylpyruvate;
C9H10INO3	10243.9	12464.3	17184.8	9866.3	6545.69	12415.3	10350.1	11492.7	10627.9	3-Iodo-L-tyrosine;
C10H11NO4	31915.9	31126.7	34239.9	35344.8	34151.4	38916.7	32188.1	37404.8	42310.7	p-Hydroxyphenylacetylglycine; 4-Hydroxyphenylacetylglycine;
C9H10O5	40502.2	28189.9	29291.3	24775.1	45635	40026	29653.4	20378.4	32428.3	(R)-3-(3,4-Dihydroxyphenyl)lactate;
C8H8O7	247.244	10333.2	17111.7	192.284	1075.85	6418.94	267.587	354.29	487.677	5-Carboxy-2-oxohept-3-enedioate; 5-Oxopent-3-ene-1,2,5-tricarboxylate;
C8H8O2	38631.5	24309.6	27413.7	44021.8	60113.8	40826.7	56821.3	36935.5	96100.8	4-Hydroxyphenylacetaldehyde; 2-(4-Hydroxyphenyl)acetaldehyde;
C7H8O5	43675.2	58858.6	40663.6	70385.3	44865.2	45853.5	42918.8	63786	62105.9	2-Oxohept-3-enedioate; 2-Oxohept-3-ene-1,7-dioate;
C14H20O7	17144.3	19892.4	28279	17727.3	20523.5	26307.6	16337.6	19841.7	23639	Salidroside; p-Hydroxyphenethyl alcohol 1-O-beta-D-glucoside; Tyrosol glucoside;
C8H8O5	7503.62	6813.24	4463.03	8083.4	7186.54	5270.53	7157.64	5079.52	8106.43	3,4-Dihydroxymandelate; 3,4-Dihydroxymandelic acid; Dihydroxymandelic acid;
C9H10O4	408748	43013.4	24775.2	381266	68877.7	30492.2	314509	265324	673701	3,4-Dihydroxyphenylpropanoate; Dihydrocaffeic acid; 3,4-Dihydroxyphenylpropionic acid; 3-(3,4-Dihydroxyphenyl)propanoate;
C7H10O6	727.307	443.011	2478.23	72.831	985.302	1041.97	13649.8	22561.8	50527.9	2,4-Dihydroxyhept-2-enedioate; 2,4-Dihydroxyhept-2-1,7-dioate; 2,4-Dihydroxyhept-2-enedioic acid;
C6H6O	72.1198	67.0102	91.2023	70.1531	86.0599	104.791	2448.44	2769.24	2978.91	Phenol; Benzenol; Hydroxybenzene; Phenic acid; Phenylic acid;
C9H11NO4	2375.09	105164	61080.8	2312.15	4757.6	12348.2	2770.91	5011.85	8028.48	3,4-Dihydroxy-L-phenylalanine; L-Dopa; 3-Hydroxy-L-tyrosine; L-beta-(3,4-Dihydroxyphenyl)alanine; Levodopa; Dihydroxy-L-phenylalanine;
C9H13NO3
C8H11NO2
C15H11I4NO4
C8H5NO2
C13H15NO6
C10H15NO3
C8H10O2
C8H10O4
C9H8O5
C9H10INO3
C10H11NO4
C9H10O5
C8H8O7
C8H8O2
C7H8O5
C14H20O7
C8H8O5
C9H10O4
C7H10O6
C6H6O
C9H11NO4

## Sheet: KEEG 00360
Formula	Mock 0d	Mock 6d	Mock 12d	Control 0d	Control 6d	Control 12d	Melatonin 0d	Melatonin 6d	Melatonin 12d	Description
C9H12O4	87956.9	76723.1	97918.8	84705	82330.6	239567	79868.5	75869.9	96404.2	cis-3-(Carboxy-ethyl)-3,5-cyclo-hexadiene-1,2-diol; cis-3-(2-Carboxy-ethyl)-3,5-cyclo-hexadiene-1,2-diol; 3-(cis-5,6-Dihydroxycyclohexa-1,3-dien-1-yl)propanoate;
C5H6O3	193074	154472	163814	180096	180620	167540	167153	142490	230319	2-Hydroxy-2,4-pentadienoate; cis-2-Hydroxypenta-2,4-dienoate; Oxopent-4-enoate; 2-Oxopent-4-enoate; 2-Hydroxypenta-2,4-dienoate;
C9H10O2	3831.81	6166.54	7675.03	3863.76	6878.45	46182	4327.06	4216.43	4539.53	Phenylpropanoate; 3-Phenyl-propionic acid; 3-Phenylpropanoic acid; 3-Phenylpropionic acid;
C9H10O6	17565.3	18014.6	17752.1	20189.6	70164	52878.7	18074.1	40763.4	53894	2-Hydroxy-6-oxonona-2,4-diene-1,9-dioate; (2Z,4E)-2-Hydroxy-6-oxonona-2,4-diene-1,9-dioate;
C9H10O3	118651	113857	130120	116801	144074	96471.7	106619	103889	135590	3-(2-Hydroxyphenyl)propanoate; 2-Hydroxyphenylpropanoate; 3-(2-Hydroxyphenyl)propionic acid; Melilotate; 3-(2-Hydroxyphenyl)propionate;
C9H11NO2	1.41568e+06	1.33773e+06	1.5332e+06	1.39866e+06	1.70673e+06	1.13102e+06	1.30539e+06	1.20634e+06	1.60519e+06	L-Phenylalanine; (S)-alpha-Amino-beta-phenylpropionic acid;
C7H6O2	3489.52	2947.26	7905.73	4018.32	5593.09	4522.56	5122.05	4181.69	5292.66	Benzoate; Benzoic acid; Benzenecarboxylic acid; Phenylformic acid; Dracylic acid;
C9H8O4	12130.2	7886.41	5732.81	10745.7	12846.1	6636.63	12322.5	8325.87	10463.3	trans-2,3-Dihydroxycinnamate; (2E)-3-(2,3-Dihydroxyphenyl)prop-2-enoate;
C8H9NO	605986	221280	513276	754480	1.0887e+06	712442	1.1112e+06	628494	2.08678e+06	2-Phenylacetamide; alpha-Phenylacetamide;
C9H9NO3	44232.1	34174	33857.1	58621.1	51997.4	40460	54466.2	42145.6	50265.6	Hippurate; Hippuric acid; N-Benzoylglycine; Benzoylaminoacetic acid;
C11H13NO3	110216	119898	191900	135350	216160	207469	136202	110798	139701	N-Acetyl-L-phenylalanine;
C13H16N2O4	24294.8	28774.6	52931.6	21809.4	43428.7	75537.5	139878	217546	441640	Phenylacetylglutamine; alpha-N-Phenylacetyl-L-glutamine; N2-(2-Phenylacetyl)-L-glutamine;
C10H11NO3	1262.42	1621.83	2302.11	723.584	1271.88	1719.87	6712.18	9703.35	21255.9	Phenylacetylglycine;
C10H13NO	309.021	882.46	13867.9	509.907	398.576	1168.55	2624.35	3748.88	3720.62	(R)-2-Methylimino-1-phenylpropan-1-ol;
C8H8O	548.888	27206.3	40740.8	605.677	731.101	1672.76	713.446	953.04	959.712	Phenylacetaldehyde; alpha-Tolualdehyde;
C8H8O2	16769.4	16273.9	15631	16226.4	16764	12118.8	15110.7	15489.6	15998.3	Phenylacetic acid; Benzylformic acid; Phenylacetate; Benzeneacetic acid;
C8H10O	105399	126116	108569	124307	107934	112096	100259	118202	87286.6	Phenylethyl alcohol; Phenethyl alcohol; 2-Phenylethanol;
Formula
C9H12O4
C5H6O3
C9H10O2
C9H10O6
C9H10O3
C9H11NO2
C7H6O2
C9H8O4
C8H9NO
C9H9NO3
C11H13NO3
C13H16N2O4
C10H11NO3
C10H13NO
C8H8O
C8H8O2
C8H10O

## Sheet: KEEG 00941
Formula	Mock 0d	Mock 6d	Mock 12d	Control 0d	Control 6d	Control 12d	Melatonin 0d	Melatonin 6d	Melatonin 12d	Description
C28H34O15	597879	746589	587743	621711	557886	672133	585175	607047	604090	Neohesperidin; Hesperetin 7-O-neohesperidoside;
C30H44N7O18P3S	15096.3	12178.8	2551.65	18226.1	15050.8	7464.71	14529.8	14274.2	18221.8	Dihydro-4-coumaroyl-CoA;
C15H12O7	1.05326e+06	175026	51341.8	662430	936808	231050	948921	405874	618521	Pentahydroxyflavanone; Dihydrotricetin;
C15H14O7	7.88749e+06	1.0235e+06	168708	4.58814e+06	6.56095e+06	1.50628e+06	7.03871e+06	2.99636e+06	4.27733e+06	Leucocyanidin; 2-(3,4-Dihydroxyphenyl)-3,4-dihydro-2H-1-benzopyran-3,4,5,7-tetrol; 3,3',4,4',5,7-Flavanhexol; 3,4-Cyanidiol; Leucoanthocyanidol; Leucocianidol; Leucocyanidol; Leukocyanidine; Procyanidol; Resivit; 2,3-trans-3,4-cis-Leucocyanidin;
C15H10O6	940327	199072	79506.4	761526	990273	297479	981775	462623	660037	Luteolin; 3',4',5,7-Tetrahydroxyflavone; 5,7,3',4'-Tetrahydroxyflavone;
C15H12O6	1.01309e+06	617440	202046	768157	770737	440614	779634	600634	712015	Dihydrokaempferol; Aromadendrin; (+)-Dihydrokaempferol; (+)-Aromadendrin;
C15H10O7	51987.2	31400.2	13192.7	125834	164482	32590.4	139903	49566.1	117613	Tricetin; 5,7,3',4',5'-Pentahydroxyflavone;
C27H32O14	22250.8	19806.6	10831.4	103557	106943	41768.2	57935.8	48297.1	65496.7	Naringin; Naringenin 7-O-neohesperidoside; Naringenin 7-O-[alpha-L-rhamnosyl-(1->2)-beta-D-glucoside];
C21H20O12	3.22081e+06	2.72973e+06	2.37875e+06	3.93288e+06	4.29178e+06	3.48595e+06	4.00865e+06	2.71311e+06	2.85516e+06	Bracteatin 6-O-glucoside; Bracteatin 6-O-beta-D-glucoside;
C15H10O5	196049	179920	169507	220599	227325	188305	210184	153232	151595	Galangin; 3,5,7-Trihydroxyflavone;
C15H14O5	55859.3	47228.5	35491.1	53392.6	49541.5	41353.5	50093.2	41853	43305.8	Phloretin;
C15H14O8	483054	364706	214344	543940	473983	316483	504203	448358	560150	Leucodelphinidin;
C15H12O8	304800	75120.7	16588.2	243599	340350	121950	327911	139254	217520	Dihydromyricetin; Ampelopsin; (+)-Dihydromyricetin; (+)-Ampelopsin;
C15H12O7	38660.9	35606.8	38417.9	45122.8	50475.3	48237.5	44432.3	43294	55313	Taxifolin; Dihydroquercetin; (+)-Dihydroquercetin; (+)-Taxifolin; trans-Dihydroquercetin;
C21H22O11	754234	735328	507698	634209	763257	536410	715360	673978	728441	2',3,4,4',6'-Peptahydroxychalcone 4'-O-glucoside; PHC 4'-O-glucoside; 2',3,4,4',6'-Pentahydroxychalcone 4'-O-beta-D-glucoside;
C15H10O6	26783.3	14761.4	8717.96	19971.2	8081.04	8381.32	17392.3	7128.24	7244.44	Kaempferol; 3,4',5,7-Tetrahydroxyflavone; 3,5,7-Trihydroxy-2-(4-hydroxyphenyl)-4H-1-benzopyran-4-one; 5,7,4'-Trihydroxyflavonol; C.I. 75640; Indigo yellow; Kaempherol; Kempferol; Nimbecetin; Pelargidenolon; Populnetin; Rhamnolutein; Rhamnolutin; Robigenin; Swartziol; Trifolitin;
C15H10O8	50323.7	30128.2	13924.6	41679.1	46216.9	29627	53474	35087.3	58632.2	Myricetin; 3,5,7,3',4',5'-Hexahydroxyflavone;
C15H14O5	44957.4	20770.6	21384	46382.5	38450.1	20887.6	57521.2	25578.2	31926.2	Apiforol;
C21H24O10	121112	115748	60594.8	92768.5	109181	78214.6	89541.8	93474.5	131129	Phlorizin; Phlorhizin; Phloridzin;
C20H20O5	80229.4	32709.3	94600.6	59916.1	27363.3	52880.5	69545.1	61030	52860.2	Desmethylxanthohumol;
C15H12O4	26719.6	11517.1	27752	26350.4	18934	22423.9	24769.5	14519.7	32473.8	Isoliquiritigenin;
C15H14O6	87693.2	53032.9	56954.2	83501.7	47434.5	21116	141190	47459.6	106864	cis-3,4-Leucopelargonidin;
C16H14O6	9058.68	24638.3	47147.6	9890.56	8823.86	9901.35	8698.32	9270.44	8366.37	Homoeriodictyol chalcone;
C21H22O5	580143	552001	542248	566660	594080	590738	588258	551006	578602	Xanthohumol; (2E)-1-[2,4-Dihydroxy-6-methoxy-3-(3-methylbut-2-en-1-yl)phenyl]-3-(4-hydroxyphenyl)prop-2-en-1-one;
C28H34O15
C30H44N7O18P3S
C15H12O7
C15H14O7
C15H10O6
C15H12O6
C15H10O7
C27H32O14
C21H20O12
C15H10O5
C15H14O5
C15H14O8
C15H12O8
C15H12O7
C21H22O11
C15H10O6
C15H10O8
C15H14O5
C21H24O10
C20H20O5
C15H12O4
C15H14O6
C16H14O6
C21H22O5

## Sheet: KEEG00940
Formula	Mock 0d	Mock 6d	Mock 12d	Control 0d	Control 6d	Control 12d	Melatonin 0d	Melatonin 6d	Melatonin 12d	Description
C16H18O9	16114.1	17886.9	28486.4	18151.4	17608.3	22606.5	17358.3	16795.4	15785.8	Scopolin;
C11H14O4	67330.3	84231.9	51853.3	59680.4	72098.4	62750.4	69475	70470.5	71897.4	Sinapyl alcohol; Sinapoyl alcohol;
C16H24NO5+	13948	4407.61	15471.9	17049.8	18683	18557.2	22260.3	16603.1	37590.7	Sinapine; Sinapoylcholine;
C9H8O3	1.45665e+07	5.48195e+06	3.16548e+06	1.57768e+07	1.98848e+07	1.23821e+07	1.91068e+07	1.81155e+07	2.21007e+07	cis-2-Hydroxycinnamate; 2-Coumarinate;
C15H16O9	113903	67982	48143.2	137974	132751	79092.2	109252	78180.3	143781	Sinapoyl malate; Sinapoyl-(S)-malate;
C12H14O4	74900.2	69438	68602.5	72435.4	76966.7	78053.9	78642.7	71832	79127.4	Coniferyl acetate;
C9H8O3	6090.64	3799.32	1256.73	5310.31	5331.78	2900.18	4972.71	2843.56	5184.22	Caffeic aldehyde; 3,4-Dihydroxycinnamaldehyde; Caffeyl aldehyde;
C16H16O8	14609	14064.2	5683.14	17121	13503	9511.58	15984.3	13428.8	12081.8	5-O-Caffeoylshikimic acid;
C10H10O3	15422.6	14743.7	13786.4	16452.7	18547.6	16989.1	14913.5	14408.4	17137.5	Coniferyl aldehyde; Coniferaldehyde; 4-Hydroxy-3-methoxycinnamaldehyde; Ferulaldehyde;
C16H18O9	47288.1	122657	528798	56864.6	71145.2	137156	71568.1	55542.3	81793.3	Chlorogenate; Chlorogenic acid; Caffeoyl quinic acid; trans-5-O-Caffeoyl-D-quinate;
C17H24O9	65003.9	57220.4	84941.3	72898.6	85548.2	90545.8	68052.8	65944.8	89842.7	Syringin; Eleutheroside B;
C15H18O8	89434.7	89247.5	90646.5	124224	216480	132287	124359	113306	276009	trans-beta-D-Glucosyl-2-hydroxycinnamate; beta-D-Glucosyl-2-coumarate;
C17H22O10	561702	583796	561747	651720	716868	605674	606317	503356	440861	1-O-Sinapoyl-beta-D-glucose; 1-O-Sinapoyl beta-D-glucoside;
C10H10O5	32280.1	34295.1	33219.7	37403.3	39327.1	35345.8	37179.3	35400.4	34202.8	5-Hydroxyferulic acid methyl ester;
C9H6O2	100948	17121.3	21444.3	94706.9	19650.9	13073.8	72929.8	57522.7	187826	Coumarin; Coumarine; Cumarin; 2H-1-Benzopyran-2-one; 1,2-Benzopyrone; 2-Propenoic acid, 3-(2-hydroxyphenyl)-, delta-lactone; 5,6-Benzo-2-pyrone; Benzo-alpha-pyrone; cis-o-Coumarinic acid lactone; Coumarinic anhydride; o-Hydroxycinnamic acid lactone; Rattex; Tonka bean camphor;
C10H10O4	134532	33046.8	35588.7	88661.5	46190.1	36905.1	68558.8	37053.9	67785.5	Ferulate; Ferulic acid; 4-Hydroxy-3-methoxycinnamic acid; 3-Methoxy-4-hydroxy-trans-cinnamate; 4-Hydroxy-3-methoxycinnamate;
C9H8O	697.221	898.028	2247.1	591.449	2812.34	1412.48	223888	257426	294853	Cinnamaldehyde;
C15H20O7	12258.8	12836	19589.8	12606	28317.6	61166.2	26409.2	25094.7	37903.2	4-Hydroxycinnamyl alcohol 4-D-glucoside; p-Coumaryl alcohol 4-O-glucoside;
C9H8O2	3016.72	98205.5	74707.3	1833.27	3928.03	7962.91	10269.2	8398.32	11175.1	4-Hydroxycinnamyl aldehyde; p-Coumaraldehyde;
C11H14O2	17233.6	14809.8	17307	15535.2	15081.3	14665.3	16020	15500.8	16970.4	Methyleugenol; O-Methyleugenol; Eugenol methyl ether;
C10H12O3	397576	389344	394753	385534	384338	367236	391031	392607	383574	Coniferyl alcohol; Coniferol; 4-(3-Hydroxy-1-propenyl)-2-methoxyphenol; trans-Coniferyl alcohol;
C16H18O9
C11H14O4
C16H24NO5+
C9H8O3
C15H16O9
C12H14O4
C9H8O3
C16H16O8
C10H10O3
C16H18O9
C17H24O9
C15H18O8
C17H22O10
C10H10O5
C9H6O2
C10H10O4
C9H8O
C15H20O7
C9H8O2
C11H14O2
C10H12O3
